# Supplementary material
Source: Research Square preprint supplement (doi:10.21203/rs.3.rs-9411603/v1)
Supplement: Supplementary file 1 [file 1b2ebd460c70aaccaa30771e.xlsx]

## Sheet: non_aiml
k_number	device_name	applicant	decision_date	date_received	product_code	advisory_committee_description	device_class	ai_ml_status
K252951	Genesis Sleep	Neurofield, Inc.	2025-12-31	2025-09-16	QJQ	Neurology	2	Traditional/Hardware
K252901	Tyber Medical Trauma Screw	Tyber Medical, LLC	2025-12-31	2025-09-11	HWC	Orthopedic	2	Traditional/Hardware
K253888	MOLLI 2 System	Stryker Endoscopy	2025-12-31	2025-12-04	NEU	General, Plastic Surgery	2	Traditional/Hardware
K243627	Laryngoscope Junctional-Arterial Restriction Clamp (L-ARC); Arterial Restriction Clamp (ARC)	Arc Trauma, LLC	2025-12-31	2024-11-25	DXC	Cardiovascular	2	Traditional/Hardware
K253305	TENS AND EMS (TENS and Muscle Stimulator) (JT1065, JT1080, JT2080, JT9034)	Shenzhen Jiantuo Electronics Co., Ltd.	2025-12-31	2025-09-29	NUH	Neurology	2	Traditional/Hardware
K251091	Lipids	Truvian Health	2025-12-30	2025-04-10	CHH	Clinical Chemistry	1	Traditional/Hardware
K250168	Life Ultra 25L Tabletop Mono Chamber Steam Sterilizer	Lucas Lifecare	2025-12-30	2025-01-21	FLE	General Hospital	2	Traditional/Hardware
K242492	Multichem ID-G (09339892190); Multichem ID-G (SR102G); Multichem ID-G (SR102MG); Multichem ID-GNeg (09339906190); Multichem ID-GNeg (SR102N); Multichem ID-GNeg (SR102MN)	Techno-Path Manufacturing , Ltd.	2025-12-30	2024-08-21	QCH	Microbiology	2	Traditional/Hardware
K253895	Arthrex SwiveLock Suture Anchor, 3.5 x 10 mm	Arthrex, Inc.	2025-12-30	2025-12-04	MBI	Orthopedic	2	Traditional/Hardware
K251025	Mon-a-Therm_x0099_ Esophageal Stethoscope with Temperature Sensor 400TM (90041, 90042, 90043, 90049)	Covidien, LLC	2025-12-29	2025-04-02	BZT	Anesthesiology	2	Traditional/Hardware
K251123	Niti-S Biliary Stent; Niti-S Biliary Slim M Stent	Taewoong Medical Co., Ltd.	2025-12-29	2025-04-11	FGE	Gastroenterology, Urology	2	Traditional/Hardware
K251534	Oxygen Concentrator (J10A)	Foshan Kycare Medical Equipment Co., Ltd.	2025-12-29	2025-05-19	CAW	Anesthesiology	2	Traditional/Hardware
K253325	ZipToe_x0099_ Hammertoe Fusion System	Toetal Solutions	2025-12-29	2025-09-30	HTY	Orthopedic	2	Traditional/Hardware
K253343	Celebrace Software	Celebrace	2025-12-29	2025-09-30	PNN	Dental	2	Traditional/Hardware
K251313	Shiley_x0099_ Adult Flexible Tracheostomy Tube XLT with TaperGuard_x0099_ Cuff, Distal with Disposable Inner Cannula; Shiley_x0099_ Adult Flexible Tracheostomy Tube XLT with TaperGuard_x0099_ Cuff, Proximal with Disposable Inner Cannula; Shiley_x0099_ Adult Flexible Tracheostomy Tube XLT Cuffless, Distal with Disposable Inner Cannula ; Shiley_x0099_ Adult Flexible Tracheostomy Tube XLT Cuffless, …	Covidien, LLC	2025-12-29	2025-04-28	JOH	Anesthesiology	2	Traditional/Hardware
K253881	Intense Pulsed Light (IPL) System (Models: T033KQ, T033KD, T033KF, T033MQ, T033MD, T033MF, T055KQ, T055KD, T055KH, T505KQ, T505KH, T505KF, SL-B505WM)	Shenzhen Fansizhe Science And Technology Co., Ltd.	2025-12-29	2025-12-04	OHT	General, Plastic Surgery	2	Traditional/Hardware
K253342	PICO-K	Speclipse, Inc.	2025-12-24	2025-09-30	GEX	General, Plastic Surgery	2	Traditional/Hardware
K253279	Feather/numiere 05 06 07 (05)	Heat IN A Click, LLC	2025-12-24	2025-09-29	OHS	General, Plastic Surgery	2	Traditional/Hardware
K253400	LED Light Therapy Face Mask (FM60X, FM60X-B, FM60X-W, FM80-W, FM80, VAP1, FM100X, FM100X-B, FM100X-W)	Shenzhen Saidi Light Therapy Technology Co., Ltd.	2025-12-24	2025-09-30	OHS	General, Plastic Surgery	2	Traditional/Hardware
K253740	TENS&EMS (HZ9151B, HZ9151C, HZ9151D)	Hong Qiangxing (Shenzhen) Electronics Limited	2025-12-23	2025-11-24	NUH	Neurology	2	Traditional/Hardware
K253312	OrangeCAD Med Abutments	Orangecad Med GmbH	2025-12-23	2025-09-30	NHA	Dental	2	Traditional/Hardware
K251958	VEINOPLUS Back	Dynapulse Medical	2025-12-23	2025-06-25		Unknown		Traditional/Hardware
K253281	UpDoc	Updoc, Inc.	2025-12-23	2025-09-29	NDC	Anesthesiology	2	Traditional/Hardware
K252145	GEN5_x0099_ and GEN5+_x0099_ 3.3mmD Dental Implants	Paragon Implant Mfg., LLC	2025-12-23	2025-07-09	DZE	Dental	2	Traditional/Hardware
K254163	VarioSurg 4	Nakanishi, Inc.	2025-12-23	2025-12-22	DZI	Dental	2	Traditional/Hardware
K252633	UNITY DX (UDX)	Cylite Pty. , Ltd.	2025-12-23	2025-08-20	OBO	Ophthalmic	2	Traditional/Hardware
K253217	MiiS Horus Arthroscope (EJA 100); MiiS Horus Endoscope Display System -Tablet (EDS 500); MiiS Horus Endoscope Display System -Video Box (EVS 700)	Medimaging Integrated Solution, Inc (Miis)	2025-12-23	2025-09-29	HRX	Orthopedic	2	Traditional/Hardware
K253341	Custom Abutments AS	Medentika GmbH	2025-12-23	2025-09-30	NHA	Dental	2	Traditional/Hardware
DEN250004	QIKCAP System	Hai Solutions	2025-12-23	2025-01-30	SGX	General Hospital	2	Traditional/Hardware
K250476	NizPlant Dental Implant System	Paragon Implant Mfg., LLC	2025-12-23	2025-02-19	DZE	Dental	2	Traditional/Hardware
K251800	Healgen® URS Test Strips	Healgen Scientific, LLC	2025-12-23	2025-06-12	JMT	Clinical Chemistry	1	Traditional/Hardware
K252146	Multi-functional Facial Beauty Device ( SKB-1703,SKB-1803,SKB-1909, SKB-2003 SKB-2109,SKB-2129,SKB-2208PRO, SKB-2209)	Shenzhen Siken 3D Technology Development Co., Ltd.	2025-12-23	2025-07-09	NFO	Neurology	2	Traditional/Hardware
K252493	NOVEOS Specific IgE (sIgE); Capture Reagent F024, Shrimp (Shrimp spp.); Capture Reagent F207, Clam (Mercenaria mercenaria); Capture Reagent F256, Walnut (Juglans spp.) ; Capture Reagent I006, German Cockroach (Blatella germanica)	Hycor Biomedical	2025-12-23	2025-08-08	DHB	Immunology	2	Traditional/Hardware
K253122	Sim&Size	Sim&Cure	2025-12-23	2025-09-25	PZO	Radiology	2	Traditional/Hardware
K252835	Electric Scooter (S202572J, S2060, M2089, S2050)	Guangdong Prestige Technology Co., Ltd.	2025-12-23	2025-09-05	INI	Physical Medicine	2	Traditional/Hardware
K253072	Paruu Wearable Breast pump (P16, P16-A, P16-B, P16-C, P16-D, P20, P9, P10, P10 PRO, P21, P22, P23, P24, P25, P26, P27, P28, P29, P30, P20-A, P20-B, P20-C, P20-D)	Linhejiacheng (Shenzhen) E-Commerce Co., Ltd.	2025-12-23	2025-09-23	HGX	Obstetrics/Gynecology	2	Traditional/Hardware
K253239	Active-V Total Knee System; World Total Knee System	Signature Orthopaedics Pty, Ltd.	2025-12-23	2025-09-29	MBH	Orthopedic	2	Traditional/Hardware
K252187	Aura Glide (FC40)	Aura Medical, LLC	2025-12-23	2025-07-14	NFO	Neurology	2	Traditional/Hardware
K253567	Healgen Accurate Urine Drug Screen Dip Card; Healgen Accurate Home Urine Drug Test Dip Card	Healgen Scientific, LLC	2025-12-23	2025-11-17	NGL	Clinical Toxicology	2	Traditional/Hardware
K253754	Philips Lumea IPL	Philips Consumer Lifestyle B.V.	2025-12-23	2025-11-25	OHT	General, Plastic Surgery	2	Traditional/Hardware
K253675	OsteoRemedies Hip Spacer System	Osteoremedies, LLC	2025-12-23	2025-11-21	KWL	Orthopedic	2	Traditional/Hardware
K251991	SafeSecure Steam Sterilization Process Indicator (4012, 4013, 4014, 4016); SafeSecure Vaporized Hydrogen Peroxide Sterilization Process Indicator (4211, 4212, 4213)	Shenzhen Safesecure Medical Infection Control Tech Co. , Ltd.	2025-12-23	2025-06-27	JOJ	General Hospital	2	Traditional/Hardware
K253135	LED Light Therapy Device (HLGMZ-3W-G1V1,HLGMZ-3W-G2V1,HLG-GJXJ-G1V1,HGMZ-2W-G1V1, HGMZ-2W-G2V1,MRD-GJXJ-G1V1.)	Dongguan Yijiaming Technology Co., Ltd.	2025-12-23	2025-09-25	OHS	General, Plastic Surgery	2	Traditional/Hardware
K252743	STRATAFIX_x0099_ Spiral PDS_x0099_ Plus Knotless Tissue Control Device; STRATAFIX_x0099_ Spiral MONOCRYL_x0099_ Plus Knotless Tissue Control Device	Ethicon, Inc.	2025-12-22	2025-08-28	GAM	General, Plastic Surgery	2	Traditional/Hardware
K253661	TMINI Miniature Robotic System	THINK Surgical, Inc.	2025-12-22	2025-11-20	OLO	Neurology	2	Traditional/Hardware
K253781	InnoClip Clip Applier	Taiwan Surgical Corporation	2025-12-22	2025-11-26	FZP	General, Plastic Surgery	2	Traditional/Hardware
K253903	InnoClip Disposable Clip Applier	Taiwan Surgical Corporation	2025-12-22	2025-12-05	FZP	General, Plastic Surgery	2	Traditional/Hardware
K253876	HEDRON_x0099_ Cervical Spacers (HEDRON C-MIS_x0099_ Spacer)	Globus Medical, Inc.	2025-12-22	2025-12-04	OVE	Orthopedic	2	Traditional/Hardware
K253727	Syndesmosis TightRope PRO	Arthrex, Inc.	2025-12-22	2025-11-24	HTN	Orthopedic	2	Traditional/Hardware
K253769	Instylla Delivery Kit	Instylla, Inc.	2025-12-22	2025-11-25	FMF	General Hospital	2	Traditional/Hardware
K252611	aprevo® cervical plating system	Carlsmed, Inc.	2025-12-22	2025-08-18	KWQ	Orthopedic	2	Traditional/Hardware
K252673	LacertaMatrix	Lacerta Life Science	2025-12-22	2025-08-25	KGN	Unknown	U	Traditional/Hardware
K251605	DIMPLO Implant System	DIMPLO, Ltd.	2025-12-22	2025-05-27	DZE	Dental	2	Traditional/Hardware
K250756	Pression Wave PRO External Counter-Pulsation System	Pression, Inc.	2025-12-22	2025-03-12	DRN	Cardiovascular	2	Traditional/Hardware
K252616	Portable oxygen concentrator (JLO-190P)	Shenzhen Homed Medical Device Co., Ltd.	2025-12-22	2025-08-19	CAW	Anesthesiology	2	Traditional/Hardware
K252361	AccurECG Analysis System (v2.0)	Accurkardia, Inc.	2025-12-22	2025-07-29	DPS	Cardiovascular	2	Traditional/Hardware
K253339	Theracor	Stimlabs, LLC	2025-12-22	2025-09-30	KGN	Unknown	U	Traditional/Hardware
K252981	EmbraceMini	Empatica S.R.L.	2025-12-22	2025-09-17	LEL	Neurology	2	Traditional/Hardware
K251764	Oxygen Concentrator-P2-O5E	Qingdao Kingon Medical Science and Technology Co., Ltd.	2025-12-22	2025-06-09	CAW	Anesthesiology	2	Traditional/Hardware
K251783	Inspire HCR and HCR DUAL cardiotomy reservoirs	Sorin Group Italia S.R.L.	2025-12-22	2025-06-11	DTN	Cardiovascular	2	Traditional/Hardware
K243342	KP Protective Face Mask	Kp Trading Co., Ltd.	2025-12-22	2024-10-25	FXX	General, Plastic Surgery	2	Traditional/Hardware
K253664	SKOUT system	Iterative Health	2025-12-22	2025-11-20	QNP	Gastroenterology, Urology	2	Traditional/Hardware
K251105	Tetra (TM-20); Tetra (TM-50)	Emed Technologies Corporation	2025-12-22	2025-04-11	PKP	General Hospital	2	Traditional/Hardware
K251572	eRapid with eTrack System	Pari Respiratory Equipment, Inc.	2025-12-19	2025-05-22	CAF	Anesthesiology	2	Traditional/Hardware
K252892	SCOUT MD Surgical Guidance System	Merit Medical Systems, Inc.	2025-12-19	2025-09-11	NEU	General, Plastic Surgery	2	Traditional/Hardware
K252877	SANDRO Dual	Wontech Co., Ltd.	2025-12-19	2025-09-10	GEX	General, Plastic Surgery	2	Traditional/Hardware
K251074	Tru Liver Health Test Panel	Truvian Health	2025-12-19	2025-04-08	CJE	Clinical Chemistry	2	Traditional/Hardware
K251751	Spo2 Sensor CSS032D	Shenzhen Ykd Technology Co., Ltd.	2025-12-19	2025-06-09	DQA	Cardiovascular	2	Traditional/Hardware
K253733	STAR Apollo_x0099_ Mapping System	Rhythm AI, Ltd.	2025-12-19	2025-11-24	DQK	Cardiovascular	2	Traditional/Hardware
K253616	ProtekDilate Vascular Access Kit	Sorin Group Italia S.R.L.	2025-12-19	2025-11-18	DRE	Cardiovascular	2	Traditional/Hardware
K253613	Monkey Rings External Ring Fixation System	Paragon 28, Inc.	2025-12-19	2025-11-18	KTT	Orthopedic	2	Traditional/Hardware
K250314	Medline ReNewal Reprocessed Abbott Agilis Nxt Steerable Introducer	Surgical Instrument Service and Savings, Inc.	2025-12-19	2025-02-04	PNE	Cardiovascular	2	Traditional/Hardware
K252781	MSFX MIKRON PEEK CAGES	Mikron Makina Sanayi VE Tic. Ltd. Sti.	2025-12-19	2025-09-02	ODP	Orthopedic	2	Traditional/Hardware
K253373	Southern Craniomaxillofacial (CMF) System	Southern Medical (Pty) , Ltd.	2025-12-19	2025-09-30	JEY	Dental	2	Traditional/Hardware
K254063	iCEM Universal Plus	Kulzer, LLC	2025-12-19	2025-12-17	EMA	Dental	2	Traditional/Hardware
K253161	Balanced Knee System TriMax Porous Femoral Components	Ortho Development Corp.	2025-12-19	2025-09-26	MBH	Orthopedic	2	Traditional/Hardware
K251050	Pectus Versa System	Gm Dos Reis Industria E Comercio	2025-12-19	2025-04-03	HRS	Orthopedic	2	Traditional/Hardware
K252342	Electric Breast Pump (YM-8807, YM-8805, YM-8806, YM-8810)	Guangdong Youmeng Electrical Technology Co., Ltd.	2025-12-19	2025-07-28	HGX	Obstetrics/Gynecology	2	Traditional/Hardware
K253202	Hoffmann LRF System	Stryker GmbH	2025-12-19	2025-09-26	KTT	Orthopedic	2	Traditional/Hardware
K250864	MatriDerm pluS+ Bi-Layer	Medskin Solutions Dr. Suwelack AG	2025-12-19	2025-03-21	KGN	Unknown	U	Traditional/Hardware
K251143	Arm Blood Pressure Monitor (MJ1L, MJ2L, RN3L, RN4L,RN5L)	Ningbo Ranor Medical Science & Technology Co., Ltd.	2025-12-19	2025-04-14	DXN	Cardiovascular	2	Traditional/Hardware
K253409	C320LBB Delivery System (C320LBBS45), C320LBB Delivery System (C320LBBS48), C320LBB Delivery System (C320LBBL45), C320LBB Delivery System (C320LBBL48)	Medtronic, Inc.	2025-12-19	2025-09-30	DQY	Cardiovascular	2	Traditional/Hardware
K253086	LED Light Therapy Device (Models: SG-FM, SG-FE)	Sunglor Technology Co., Ltd.	2025-12-19	2025-09-23	OHS	General, Plastic Surgery	2	Traditional/Hardware
K250998	CO2 Laser Therapy System (Model: LFS-D9U)	Sanhe Lefis Electronics Co., Ltd.	2025-12-19	2025-04-01	GEX	General, Plastic Surgery	2	Traditional/Hardware
K252780	LCD Monitor (CL1902A, CL2103F)	Shenzhen Beacon Display Technology Co., Ltd.	2025-12-19	2025-09-02	PGY	Radiology	2	Traditional/Hardware
K251469	Endura_x0099_ Ureteral Stent and Stent Set	Cathegenix (Xiamen) Co., Ltd.	2025-12-19	2025-05-13	FAD	Gastroenterology, Urology	2	Traditional/Hardware
K232365	Vivo 45 LS	Oconnell Regulatory Consultants, Inc.	2025-12-19	2023-08-07	CBK	Anesthesiology	2	Traditional/Hardware
K252480	CE Deliver (DLV)	CapsoVision, Inc.	2025-12-19	2025-08-07	NEZ	Gastroenterology, Urology	2	Traditional/Hardware
K253054	LED Light Therapy Mask (M19, M19-1, M19-2, M19-3, M19-5, M19-6)	Shenzhen Xinlong Precision Plastic Mold Products Co., Ltd.	2025-12-19	2025-09-22	OHS	General, Plastic Surgery	2	Traditional/Hardware
K252167	Enhanced Silver Gelling Fiber Dressing (OTC) Extra Enhanced Silver Gelling Fiber Dressing (Prescription)	Qingdao Bright Moon Biomedical Materials Co., Ltd.	2025-12-19	2025-07-10	FRO	Unknown	U	Traditional/Hardware
K253577	IB3D_x0099_ PL Spinal System (A24000000 / IB3D Universal Implant Inserter)	Medicrea International S.A.S. (Medtronic)	2025-12-19	2025-11-17	MAX	Orthopedic	2	Traditional/Hardware
K251402	LIA-1 Catheter (542-1)	Leadoptik, Inc.	2025-12-19	2025-05-06	KTI	Ear, Nose, Throat	2	Traditional/Hardware
K251011	Chiavaye Personal Moisturizer	Unipack, LLC	2025-12-19	2025-04-01	NUC	Obstetrics/Gynecology	2	Traditional/Hardware
K251037	Rectal Applicator	Nucletron B.V.	2025-12-19	2025-04-03	JAQ	Radiology	2	Traditional/Hardware
K251077	JOULE 1064nm System and Accessories	Sciton, Inc.	2025-12-19	2025-04-08	GEX	General, Plastic Surgery	2	Traditional/Hardware
K251152	DBLG2	Diabeloop	2025-12-19	2025-04-14	QJI	Clinical Chemistry	2	Traditional/Hardware
K252974	EMPOWR Knee	Encore Medical, L.P.	2025-12-19	2025-09-17	JWH	Orthopedic	2	Traditional/Hardware
K252754	Wearable Electric Breast Pump (YM-8803)	Guangdong Youmeng Electrical Technology Co., Ltd.	2025-12-19	2025-08-29	HGX	Obstetrics/Gynecology	2	Traditional/Hardware
K253479	Optiflow Switch+ Filtered Nasal Interface with CO2 Sampling (AA042J)	Fisher &Paykel Healthcare , Ltd.	2025-12-19	2025-10-14	BTT	Anesthesiology	2	Traditional/Hardware
K252956	Helo Thrombectomy System	Endovascular Engineering, Inc.	2025-12-18	2025-09-16	QEW	Cardiovascular	2	Traditional/Hardware
K251915	Amethyst HP PTA OTW 0.035 Catheter	Natec Medical , Ltd.	2025-12-18	2025-06-23	LIT	Cardiovascular	2	Traditional/Hardware
K253518	FX CorAL 40; FX CorAL 50	Fresenius Medical Care Renal Therapies Group, LLC	2025-12-18	2025-11-12	KDI	Gastroenterology, Urology	2	Traditional/Hardware
K253516	Assert-IQ (DM5100)	Abbott Medical	2025-12-18	2025-11-12	MXD	Cardiovascular	2	Traditional/Hardware
K252348	Tomey Optical Biometer OA-2000 (OA-2000)	Tomey Corporation	2025-12-18	2025-07-29	MXK	Ophthalmic	2	Traditional/Hardware
K252976	Park Dental Nylon MAD	Park Dental Research Corp.	2025-12-18	2025-09-17	LRK	Dental	2	Traditional/Hardware
K252402	Midline Catheter	Terumo Medical Products (Hangzhou) Co., Ltd.	2025-12-18	2025-07-31	PND	General Hospital	2	Traditional/Hardware
K252533	HemoSphere Alta Advanced Monitoring Platform (ALTAALL1; ALTACR1; ALTASR1)	Edwards Lifesciences	2025-12-18	2025-08-12	DQK	Cardiovascular	2	Traditional/Hardware
K252793	ARMI® Endoscopic Video Image Processor (JY-MIP-3000); ARMI® Single-Use Hysteroscope (SH-01A, SH-02A, SH-03A, SH-04A, SH-05A, SH-01B, SH-02B, SH-03B, SH-04B, SH-01C, SH-02C, SH-03C, SH-04C)	Jiangsu Jiyuan Medical Technology Co., Ltd.	2025-12-18	2025-08-29	HIH	Obstetrics/Gynecology	2	Traditional/Hardware
K250993	Single Use Cytology Brush V (BC-V600P-3010)	Olympus Medical Systems Corporation	2025-12-18	2025-03-31	FDX	Gastroenterology, Urology	2	Traditional/Hardware
K251562	OTSCneo System Set (100.03n-14n, 100.27n-31n)	Ovesco Endoscopy AG	2025-12-18	2025-05-22	PKL	Gastroenterology, Urology	2	Traditional/Hardware
K252071	RefleXion Medical Radiotherapy System, Reflexion X2	Reflexion Medical, Inc.	2025-12-18	2025-07-01	QVA	Radiology	2	Traditional/Hardware
K252320	SIMDA Abutments	Simda Co., Ltd.	2025-12-18	2025-07-25	NHA	Dental	2	Traditional/Hardware
K253758	Dental Cone; Dental Sponge	Medizin Produkte Neustadt GmbH (Mpn)	2025-12-18	2025-11-25	OLR	Unknown	U	Traditional/Hardware
K253915	MOVIVA® Hybrid Ablation Probe	Erbe Elektromedizin GmbH	2025-12-18	2025-12-08	GEI	General, Plastic Surgery	2	Traditional/Hardware
K253093	Vital_x0099_ Spinal Fixation System	Highridge Medical, LLC	2025-12-17	2025-09-23	NKB	Orthopedic	2	Traditional/Hardware
K252518	DuoprossTM Smart Cap (Type I)	Duopross Meditech Corporate	2025-12-17	2025-08-11	FMF	General Hospital	2	Traditional/Hardware
K253721	KHEIRON® Spinal Fixation System, including patient specific K-ROD	S.M.A.I.O	2025-12-17	2025-11-24	NKB	Orthopedic	2	Traditional/Hardware
K250854	Multi-parameter Patient Monitor (N10); Multi-parameter Patient Monitor (N12); Multi-parameter Patient Monitor (N15); Multi-parameter Patient Monitor (N10MPro); Multi-parameter Patient Monitor (N12MPro); Multi-parameter Patient Monitor (N15MPro)	Shenzhen Comen Medical Instruments Co.,Ltd	2025-12-17	2025-03-21	MHX	Cardiovascular	2	Traditional/Hardware
K252398	SURFLO Hybria Closed System Safety IV Catheter	Terumo Medical Products (Hangzhou) Co., Ltd.	2025-12-17	2025-07-31	FOZ	General Hospital	2	Traditional/Hardware
K253710	Dexcom G7 Continuous Glucose Monitoring (CGM) System, Dexcom G7 15 Day Continuous Glucose Monitoring (CGM) System	Dexcom, Inc.	2025-12-17	2025-11-24	QBJ	Clinical Chemistry	2	Traditional/Hardware
K252983	Wrinkle Retreat Pro Light Therapy Face Mask (Model: PH-m03)	Shenzhen Goodwind Technology Development Co., Ltd.	2025-12-17	2025-09-18	OHS	General, Plastic Surgery	2	Traditional/Hardware
K252417	Amplatzer Piccolo_x0099_ Delivery System (9-PDS-04F-045)	Abbott Medical	2025-12-17	2025-08-01	DQY	Cardiovascular	2	Traditional/Hardware
K252508	Intri26 Introducer Sheath	Inari Medical, Inc.	2025-12-17	2025-08-08	DYB	Cardiovascular	2	Traditional/Hardware
K253839	Elecsys Anti-SARS-CoV-2	Roche Diagnostics	2025-12-17	2025-12-01	QVP	Microbiology	2	Traditional/Hardware
K252739	ETHICON_x0099_ 4000 45mm Compact Stapler (EC3DT45C); ETHICON_x0099_ 4000 45mm Standard Stapler (EC3DT45S); ETHICON_x0099_ 4000 45mm Long Stapler (EC3DT45L); ETHICON_x0099_ 3D 45mm White Reload (ER45W); ETHICON_x0099_ 3D 45mm Blue Reload (ER45B); ETHICON_x0099_ 3D 45mm Green Reload (ER45G); ETHICON_x0099_ 3D 45mm Black Reload (ER45T)	Ethicon Endo-Surgery, LLC	2025-12-17	2025-08-28	GDW	General, Plastic Surgery	2	Traditional/Hardware
K253719	Unscented Menstrual Long Applicator Tampon; Unscented Menstrual Cardboard Applicator Tampon; Unscented Menstrual Digital Tampons	Unibeauty (Hubei) Technology Co., Ltd.	2025-12-17	2025-11-24	HEB	Obstetrics/Gynecology	2	Traditional/Hardware
K252191	BRUSIO Trauma Toolbox System; TAMINA 3.5mm Proximal Humerus System	Bonebridge AG	2025-12-17	2025-07-14	HRS	Orthopedic	2	Traditional/Hardware
K252111	Versius Surgical System (Versius Plus)	Cmr Surgical Limited	2025-12-16	2025-07-07	SCV	General, Plastic Surgery	2	Traditional/Hardware
K253118	Companion Spine DIAM_x0099_ Instrumentation	Companion Spine France	2025-12-16	2025-09-24	QLR	Orthopedic	2	Traditional/Hardware
K251256	PENTAX Medical Video Upper GI Scopes (EG Family) (EG Family); PENTAX Medical Video Colonoscopes (EC Family) (EC Family)	Pentax of America, Inc.	2025-12-16	2025-04-23	FDS	Gastroenterology, Urology	2	Traditional/Hardware
K253620	TroClose 1200	Gordian Surgical, Ltd.	2025-12-16	2025-11-18	GAM	General, Plastic Surgery	2	Traditional/Hardware
K252940	VR® Personal Protective Level 3 Gown (VR Gowns)	PolyConversions, Inc.	2025-12-16	2025-09-15	QPC	General, Plastic Surgery	2	Traditional/Hardware
K251771	Cambridge Partial Knee	Signature Orthopaedics Pty, Ltd.	2025-12-16	2025-06-10	HSX	Orthopedic	2	Traditional/Hardware
K251951	Single-Use Video Flexible Ureterorenoscope (RP-U-C03R9, RP-U-C03R3, RP-U-C03S9, RP-U-C03S3); Endoscopic Video Image Processor (RP-IPD-V2000EF); Endoscopic Video Image Processor (RP-IPD-V1000F)	Guangzhou Red Pine Medical Instrument Co., Ltd.	2025-12-16	2025-06-25	FGB	Gastroenterology, Urology	2	Traditional/Hardware
K252268	V series portable oxygen concentrator (V5, V5C, V6, V6C)	Shenzhen Harveymed Technology Co., Ltd.	2025-12-16	2025-07-21	CAW	Anesthesiology	2	Traditional/Hardware
K250925	ADVIA Centaur Cytokeratin Fragment 21-1	Fujirebio Diagnostics,Inc.	2025-12-16	2025-03-27	OVK	Immunology	2	Traditional/Hardware
K252373	BioFlo Hybrid PICC with ENDEXO Technology and PASV Valve Technology; BioFlo PICC with ENDEXO Technology and PASV Valve Technology; BioFlo PICC with ENDEXO Technology; BioFlo Midline Catheter; Xcela Power Injectable PICC; Xcela PICC with PASV Valve Technology; Xcela Hybrid PICC with PASV Valve Technology	Spectrum Vascular	2025-12-16	2025-07-30	LJS	General Hospital	2	Traditional/Hardware
K251745	Welch Allyn FlexiPort Blood Pressure Cuffs (FlexiPort Blood Pressure Cuffs)	Baxter Healthcare Corporation	2025-12-16	2025-06-06	DXQ	Cardiovascular	2	Traditional/Hardware
K250319	MFUSE (MS001)	Machina Medical, Inc.	2025-12-15	2025-02-04	QSY	Unknown	U	Traditional/Hardware
K251770	SleepRes PAP System	Sleepres, Inc.	2025-12-15	2025-06-10	BZD	Anesthesiology	2	Traditional/Hardware
K253677	Tembo Embolic System	Instylla, Inc.	2025-12-15	2025-11-21	KRD	Cardiovascular	2	Traditional/Hardware
K252574	Erchonia CLX (Model # CFL)	Erchonia Corporation	2025-12-15	2025-08-14	OLI	General, Plastic Surgery	2	Traditional/Hardware
K252675	da Vinci SP Surgical System (SP1098)	Intuitive Surgical, Inc.	2025-12-15	2025-08-25	NAY	Gastroenterology, Urology	2	Traditional/Hardware
K251302	OptiMesh Multiplanar Expandable Interbody Fusion System	Spineology, Inc.	2025-12-15	2025-04-28	OQB	Orthopedic	2	Traditional/Hardware
K252898	Triathlon® Tritanium® Asymmetric Patella; Triathlon® Tritanium® Symmetric Patella; Triathlon® Symmetric Patella; Triathlon® Asymmetric Patella; Scorpio® Universal Dome Patella; Triathlon® Hinge Bumper	Howmedica Osteonics Corp., Dba Stryker Orthopaedics	2025-12-15	2025-09-11	KRO	Orthopedic	2	Traditional/Hardware
K252950	Paradigm System	Proprio, Inc.	2025-12-15	2025-09-16	OLO	Neurology	2	Traditional/Hardware
K253741	V_x0095_Stick_x0099_ Vascular Access Set	Argon Medical Devices, Inc.	2025-12-15	2025-11-24	DYB	Cardiovascular	2	Traditional/Hardware
K250851	Hypnos (369054-200)	Cadwell Industries, Inc.	2025-12-14	2025-03-21	OLZ	Neurology	2	Traditional/Hardware
K251989	VizMark Preloaded Tissue Marker Device (VM-0001)	Breast-Med, Inc.	2025-12-12	2025-06-27	NEU	General, Plastic Surgery	2	Traditional/Hardware
K250488	Cerynë Intimate Care	Ansella Therapeutics	2025-12-12	2025-02-19	NUC	Obstetrics/Gynecology	2	Traditional/Hardware
K252120	Fundus On Phone Non Mydriatic (FOP NM-10)	Remidio Innovative Solutions Private Limited	2025-12-12	2025-07-07	HKI	Ophthalmic	2	Traditional/Hardware
K252785	TopCEM Vigor SA Self-Adhesive Resin Cement	Rizhao Huge Biomaterials Company, Ltd.	2025-12-12	2025-09-02	EMA	Dental	2	Traditional/Hardware
K251177	Self-Seal Sterilization Pouch and Roll	Guangdong Maidi Medical Co., Ltd.	2025-12-12	2025-04-16	FRG	General Hospital	2	Traditional/Hardware
K250974	Bio Arterial Deluxe (IC-BAP-DX)	Bio Compression Systems, Inc.	2025-12-12	2025-03-31	JOW	Cardiovascular	2	Traditional/Hardware
K250821	Horizon AF Plus System (Integrated A.L. One AF Plus OXYGENATOR and Horizon CVR) (US5300); A.L. One AF Plus OXYGENATOR (US5204); Horizon CVR (US5073)	Eurosets Srl	2025-12-12	2025-03-18	DTZ	Cardiovascular	2	Traditional/Hardware
K253609	TRAUMAGEL® 2.0 Hemostatic Gel	Cresilon, Inc.	2025-12-12	2025-11-18	QSY	Unknown	U	Traditional/Hardware
K250847	VaporShield	Vault Paragon Group, Inc.	2025-12-12	2025-03-20	MEG	General Hospital	2	Traditional/Hardware
K252391	Revi System	Bluewind Medical , Ltd.	2025-12-12	2025-07-31	QXM	Gastroenterology, Urology	2	Traditional/Hardware
K252090	Pterygoid Indication for GM Helix Implants	JJGC Indústria e Comércio de Materiais Dentários S.A.	2025-12-12	2025-07-02	DZE	Dental	2	Traditional/Hardware
K242817	Jason membrane	Botiss Biomaterials GmbH	2025-12-12	2024-09-18	NPL	Dental	2	Traditional/Hardware
K251085	iHealth Flu A&B/COVID-19/RSV Rapid Test; iHealth Flu A&B/COVID-19/RSV Rapid Test Pro	Ihealth Labs, Inc.	2025-12-12	2025-04-09	SCA	Microbiology	2	Traditional/Hardware
K251089	EXEL Disposable Syringe; EXEL Disposable Syringe with Needle; EXEL Disposable Syringe with Secure Touch® Safety Needle; EXEL Disposable Hypodermic Needle	Exelint International, Co.	2025-12-12	2025-04-10	FMF	General Hospital	2	Traditional/Hardware
K252745	Halo Sterile Single-use Radial Fiber (Halo-R-0.40-2.5/Halo-R-0.60-2.5/Novo-R-0.60-1.8/Novo-R-0.40-1.8)	Micro-Energy Medical Technology Co., Ltd.	2025-12-12	2025-08-29	GEX	General, Plastic Surgery	2	Traditional/Hardware
K252273	Therapy US	Dmc Importação E Exportação DE Equipamentos Ltda	2025-12-12	2025-07-22	NHN	Physical Medicine	2	Traditional/Hardware
K250863	FUJIFILM Ultrasonic Endoscope EB-710US	Fujifilm Corporation	2025-12-12	2025-03-21	EOQ	Ear, Nose, Throat	2	Traditional/Hardware
K251092	iHealth Flu A&B/COVID-19 Rapid Test; iHealth Flu A&B/COVID-19 Rapid Test Pro	Ihealth Labs, Inc.	2025-12-12	2025-04-10	SCA	Microbiology	2	Traditional/Hardware
K252681	EnCor EnCompass_x0099_ Breast Biopsy and Tissue Removal System	Bard Peripheral Vascular, Inc.	2025-12-12	2025-08-25	KNW	Gastroenterology, Urology	2	Traditional/Hardware
K252897	APS Osteotomy Fixation System (0945-1302-xx /4.5mm Cortex Screw); APS Osteotomy Fixation System (0850-4302-xx / 5.0mm Locking Screw); APS Osteotomy Fixation System (0701-xx10(1)-05 / Proximal Medial Tibial Osteotomy Locking Plate); APS Osteotomy Fixation System (0701-xx60(1)-0x / Proximal Medial Tibial Osteotomy Locking Plate, Small); APS Osteotomy Fixation System (0702-xx00(1)-03 / Proximal Late…	A Plus Biotechnology Co., Ltd.	2025-12-11	2025-09-11	HRS	Orthopedic	2	Traditional/Hardware
K252694	Target Detachable Coil	Stryker Neurovascular	2025-12-11	2025-08-26	HCG	Neurology	2	Traditional/Hardware
K252941	HALYARD* Adult Face Mask with SO SOFT* Lining and SO SOFT* Earloops	O&M Halyard, Inc.	2025-12-11	2025-09-15	FXX	General, Plastic Surgery	2	Traditional/Hardware
K253200	Cervical Spine Truss System - Stand Alone (CSTS-SA)	4Web Medical, Inc.	2025-12-11	2025-09-26	OVE	Orthopedic	2	Traditional/Hardware
K250988	KLS Martin Pure Pectus System	KLS-Martin L.P.	2025-12-11	2025-03-31	HRS	Orthopedic	2	Traditional/Hardware
K252997	HyperFlex® Bunion Correction System	Hyperflex Medical	2025-12-11	2025-09-18	HRS	Orthopedic	2	Traditional/Hardware
K252497	SANSA HSAT	Huxley Medical	2025-12-10	2025-08-08	MNR	Anesthesiology	2	Traditional/Hardware
K251598	Intellidrop	Brainspace, Inc.	2025-12-10	2025-05-27	JXG	Neurology	2	Traditional/Hardware
K250192	Verisafe Safety Retractable Insulin Syringes	Promisemed Hangzhou Meditech Co., Ltd.	2025-12-10	2025-01-23	FMF	General Hospital	2	Traditional/Hardware
K252808	GlasIonomer FX-LC	Shofu Dental Corporation	2025-12-09	2025-09-03	EMA	Dental	2	Traditional/Hardware
K250742	Focused Cryotherapy System	Focused Cryo, Inc.	2025-12-09	2025-03-11	GEH	General, Plastic Surgery	2	Traditional/Hardware
K253706	Lancing device (HH-XV-T)	Tianjin Huahong Technology Co., Ltd.	2025-12-09	2025-11-24	QRL	General, Plastic Surgery	2	Traditional/Hardware
K250805	DeVilbiss PulmO2 10-Liter Oxygen Concentrator (1060AW)	Devilbiss Healthcare, LLC	2025-12-09	2025-03-17	CAW	Anesthesiology	2	Traditional/Hardware
K252343	Atlantis® Abutments in Titanium	Dentsply Sirona	2025-12-09	2025-07-28	NHA	Dental	2	Traditional/Hardware
K243449	INFINITT DPS	Infinitt Healthcare Co., Ltd.	2025-12-09	2024-11-07	QKQ	Pathology	2	Traditional/Hardware
K252154	Portable Electro Stimulation Therapy Device (LGT-2320BE, LGT-2320ME, and LGT-2320SP)	Guangzhou Longest Medical Technology Co., Ltd.	2025-12-09	2025-07-09	NGX	Physical Medicine	2	Traditional/Hardware
K252994	LED Therapy Mask (SR11CM, SR11CM1, SR11CM2, SR11CM3, SR11CM4, SR11CM5, SR11CM6, SR11CM7, SR11CM8)	Guangdong Ace-Tec Co., Ltd.	2025-12-08	2025-09-18	OHS	General, Plastic Surgery	2	Traditional/Hardware
K250190	Sequential Compression System (SCD600)	Shenzhen Comen Medical Instruments Co.,Ltd	2025-12-08	2025-01-23	JOW	Cardiovascular	2	Traditional/Hardware
K251936	Ceribell Delirium Monitor System	Ceribell, Inc.	2025-12-08	2025-06-24	NCG	Neurology	2	Traditional/Hardware
K252789	Glass Ceramic	Shenzhen Xiangtong Co., Ltd.	2025-12-08	2025-09-02	EIH	Dental	2	Traditional/Hardware
K251829	DeGen Medical Patient Specific Implant (PSI) System	Degen Medical	2025-12-08	2025-06-13	OVD	Orthopedic	2	Traditional/Hardware
K252067	Velora Acetabular System	Restor3D, Inc.	2025-12-05	2025-07-01	LPH	Orthopedic	2	Traditional/Hardware
K250764	SpineLinc Anterior Cervical Implant System	Lincotek Medical	2025-12-05	2025-03-13	ODP	Orthopedic	2	Traditional/Hardware
K252605	mcompass Anorectal Balloon Expulsion Catheter (RMD-003-001)	Medspira, LLC	2025-12-05	2025-08-18	FFX	Gastroenterology, Urology	2	Traditional/Hardware
K251337	Thermo Scientific Oxoid Gepotidacin Disc (10 µg) GEP10	Thermo Fisher Scientific (Oxoid Ltd.)	2025-12-05	2025-04-30	JTN	Microbiology	2	Traditional/Hardware
K253868	QuietLab Pro	QuietLab, LLC	2025-12-05	2025-12-03	LRK	Dental	2	Traditional/Hardware
K251731	KARL STORZ Flexible Intubation Video Endoscope _x0096_ Sterile (FIVE-S) (0916612)	Karl Storz SE & CO. KG	2025-12-05	2025-06-06	EOQ	Ear, Nose, Throat	2	Traditional/Hardware
K251722	ProSeal_x0099_ Transfer Injector (421120, 421130, 421140)	Epic Medical Pte. , Ltd.	2025-12-05	2025-06-04	ONB	General Hospital	2	Traditional/Hardware
K250743	Remvia NightGuard	Remvia	2025-12-05	2025-03-11	MQC	Unknown	U	Traditional/Hardware
K250795	PUREVUE_x0099_ FMS	W.O.M. World of Medicine GmbH	2025-12-05	2025-03-14	HRX	Orthopedic	2	Traditional/Hardware
K252142	Multi-functional Facial Beauty Device (SKB-1703,SKB-1803,SKB-1809, SKB-1909, SKB-2109,SKB-2129,SKB-2208PRO, SKB-2209)	Shenzhen Siken 3D Technology Development Co., Ltd.	2025-12-05	2025-07-08	OHS	General, Plastic Surgery	2	Traditional/Hardware
K252504	Gastric Alimetry	Alimetry , Ltd.	2025-12-05	2025-08-08	MYE	Gastroenterology, Urology	2	Traditional/Hardware
K243438	MEMO Patch M (MPT-E08R-UNC01)	HUINNO Co., Ltd.	2025-12-05	2024-11-06	DXH	Cardiovascular	2	Traditional/Hardware
K252465	Any-Core	Mediclus Co., Ltd.	2025-12-05	2025-08-06	EBF	Dental	2	Traditional/Hardware
K252151	els unibond	Saremco Dental AG	2025-12-05	2025-07-09	KLE	Dental	2	Traditional/Hardware
K251657	Personalized Therapy Comfort Settings (PTCS)	ResMed Corp	2025-12-05	2025-05-30	BZD	Anesthesiology	2	Traditional/Hardware
K250711	VSP Orthopedics System	3D Systems, Inc.	2025-12-05	2025-03-10	PBF	Orthopedic	2	Traditional/Hardware
K251403	Dornier Bi-Polar Electrode BIP12CLM Bipolar 12° Medium Cutting Loop 24 Fr Electrode-Sterile, Single-Use BIP12CLL Bipolar 12° Large Cutting Loop 24 Fr Electrode-Sterile, Single-Use BIP30CLM Bipolar 30° Medium Cutting Loop 24 Fr Electrode-Sterile, Single-Use BIP30CLL Bipolar 30° Large Cutting Loop 24 Fr Electrode-Sterile, Single-Use BIPMBLA Bipolar Medium Bladder Loop 24 Fr Electrode-Sterile, Singl…	Dornier Medtech America Inc (Dmta)	2025-12-05	2025-05-06	FAS	Gastroenterology, Urology	2	Traditional/Hardware
K250512	Augmented Gingival Matrix	Neo Modulus (Suzhou) Medical Sci-Tech Co., Ltd.	2025-12-05	2025-02-21	NPL	Dental	2	Traditional/Hardware
K252296	OncoPatch	Oncopatch, Inc.	2025-12-05	2025-07-23	KXK	Radiology	2	Traditional/Hardware
K250679	FFX Facet Fixation System	Sc Medica	2025-12-04	2025-03-06	MRW	Unknown	U	Traditional/Hardware
K251257	nSet+ Stabilization Set [6426733]; nSet+ Stabilization Set with nSyte Needle Free Connector (NFC) [6426731]; nSyte Needle Free Connector (NFC) [6426727]	Np Medical	2025-12-04	2025-04-23	FPA	General Hospital	2	Traditional/Hardware
K252588	Mobility Scooter (T5)	Zhejiang Taotao Vehicle Co., Ltd.	2025-12-04	2025-08-15	INI	Physical Medicine	2	Traditional/Hardware
K251943	Spineology Navigation Instruments	Spineology, Inc.	2025-12-04	2025-06-24	OLO	Neurology	2	Traditional/Hardware
K250816	ADVIA Centaur Anti-Thyroglobulin II (aTgII)	Siemens Healthcare Diagnostics, Inc.	2025-12-04	2025-03-18	JNL	Immunology	2	Traditional/Hardware
K252429	Vektor Computational ECG Mapping System (vMap®)	Vektor Medical, Inc.	2025-12-04	2025-08-01	DQK	Cardiovascular	2	Traditional/Hardware
K252596	Tigon Medical Knotless and Dual Javelin All-Suture Anchors	Tigon Medical	2025-12-04	2025-08-15	MBI	Orthopedic	2	Traditional/Hardware
K250692	GentleBeam (GB1000)	Voxel Ray Solutions, LLC	2025-12-03	2025-03-07	JAD	Radiology	2	Traditional/Hardware
K252213	Bendit17 Microcatheter	Bend IT Technologies, Ltd.	2025-12-03	2025-07-15	QJP	Cardiovascular	2	Traditional/Hardware
K251881	HippoMind (v1.0)	Hippoclinic	2025-12-03	2025-06-18	OLT	Neurology	2	Traditional/Hardware
K250564	Surgical Gown (Level 3: S, M, L, XL, XXL, XXXL)	Yadu Medical (Henan) Co., Ltd.	2025-12-03	2025-02-26	FYA	General, Plastic Surgery	2	Traditional/Hardware
K253293	VitaloJAK Clinic (Model 7100)	Vitalograph , Ltd.	2025-12-03	2025-09-29	DSH	Cardiovascular	2	Traditional/Hardware
K250725	Hugo_x0099_ RAS System	Covidien, LLC	2025-12-03	2025-03-10	SCV	General, Plastic Surgery	2	Traditional/Hardware
K251779	Omnipod 5 algorithm	Insulet Corporation	2025-12-03	2025-06-10	QJI	Clinical Chemistry	2	Traditional/Hardware
K250896	Aura Wave	Aura Wellness, LLC	2025-12-02	2025-03-25	SGT	Physical Medicine	2	Traditional/Hardware
K252103	Acorn 3D Software (AC-SEG-4009); Acorn 3DP Model (AC-101-XX)	Mighty Oak Medical	2025-12-02	2025-07-03		Unknown		Traditional/Hardware
K252069	da Vinci SP Surgical System (SP1098)	Intuitive Surgical, Inc.	2025-12-02	2025-07-01	NAY	Gastroenterology, Urology	2	Traditional/Hardware
K250884	0.9 % Sodium Chloride Injection, USP, BD PosiFlush_x0099_ SP Syringe	Becton, Dickinson and Company	2025-12-02	2025-03-24	NGT	General Hospital	2	Traditional/Hardware
K252021	Disposable Endoscopic Injection Needles	Changzhou New Med Micro-Medtech Co., Ltd.	2025-12-02	2025-06-30	FBK	Gastroenterology, Urology	2	Traditional/Hardware
K253250	Minuteman® G6 MIS Fusion Plate	Spinal Simplicity, LLC	2025-12-01	2025-09-29	PEK	Orthopedic	2	Traditional/Hardware
K251691	Unimed Reusable SpO2 Sensors (-08 Series) (U403S-08); Unimed Reusable SpO2 Sensors (-08 Series) (U203S-08); Unimed Reusable SpO2 Sensors (-08 Series) (U103S-08); Unimed Reusable SpO2 Sensors (-08 Series) (U103-08)	Unimed Medical Supplies, Inc.	2025-12-01	2025-06-02	DQA	Cardiovascular	2	Traditional/Hardware
K251696	Unimed Reusable SpO2 Sensors (-48 Series and -29 Series) (U410-48); Unimed Reusable SpO2 Sensors (-48 Series and -29 Series) (U410-29)	Unimed Medical Supplies, Inc.	2025-12-01	2025-06-02	DQA	Cardiovascular	2	Traditional/Hardware
K252786	Led Light Phototherapy Bed (Pro 450/ GY-680A)	Shenzhen Suyzeko Limited.	2025-12-01	2025-09-02	OLI	General, Plastic Surgery	2	Traditional/Hardware
K252827	IBP cable Becton Dickinson (2606488); IBP cable Edwards (2606489); IBP cable Abbott, Medex (2606490); IBP cable Utah (2606491); IBP Adapter Cable Draeger 7pin (2607558); IBP Adapter Cable Draeger 10pin (2607559)	Drägerwerk AG & Co KGaA	2025-12-01	2025-09-05	DSA	Cardiovascular	2	Traditional/Hardware
K252658	Medical Diode Laser Systems (TR-B)	Baoding Te'Anzhou Electronic Technology Co., Ltd.	2025-11-28	2025-08-22	GEX	General, Plastic Surgery	2	Traditional/Hardware
K253303	Dendrite Imaging System	Dendrite Imaging, Inc.	2025-11-28	2025-09-29	QDG	General, Plastic Surgery	2	Traditional/Hardware
K250636	Sophy Mini Monopressure Valve (SM1)	Sophysa	2025-11-28	2025-03-03	JXG	Neurology	2	Traditional/Hardware
K252760	Carriere® Motion Pro® Clear Bite Corrector	Ortho Organizers, Inc.	2025-11-27	2025-08-29	DYW	Dental	2	Traditional/Hardware
K252355	K-SHIELD Advantage PORT ACCESS INFUSION SET With High Pressure Tubing	Sb-Kawasumi Laboratories, Inc.	2025-11-26	2025-07-29	PTI	General Hospital	2	Traditional/Hardware
K252388	Vanquish Water Vapor Ablation Device	Francis Medical, Inc.	2025-11-26	2025-07-31	KNS	Gastroenterology, Urology	2	Traditional/Hardware
K251058	Tru Kidney Health Test Panel; Tru Analyzer	Truvian Health	2025-11-26	2025-04-04	CGX	Clinical Chemistry	2	Traditional/Hardware
DEN240077	MuReva OM_x0099_	Mureva Phototherapy, Inc.	2025-11-26	2024-12-23	SGQ	Dental	2	Traditional/Hardware
K252248	CEREC Tessera Abutment System	Dentsply Sirona	2025-11-26	2025-07-18	NHA	Dental	2	Traditional/Hardware
K252260	RELIEEV HSG Catheter (HSG7FA1)	Li Medical Corporation , Ltd.	2025-11-26	2025-07-21	LKF	Obstetrics/Gynecology	2	Traditional/Hardware
K252405	Medline ReNewal Reprocessed Boston Scientific Dynamic Tip Unidirectional Steerable Diagnostic Catheter	Surgical Instrument Service and Savings, Inc.	2025-11-26	2025-07-31	NLH	Cardiovascular	2	Traditional/Hardware
K251697	Flowflex® Plus Strep A Rapid Test Cassette; Flowflex® Plus Strep A Rapid Test Strip	ACON Laboratories, Inc.	2025-11-26	2025-06-02	GTY	Microbiology	1	Traditional/Hardware
K253168	0.014_x0094_ Willow Guidewire	Arbor Endovascular, LLC	2025-11-26	2025-09-26	MOF	Cardiovascular	2	Traditional/Hardware
K253269	OEC One CFD	Ge Hualun Medical Systems Co. , Ltd.	2025-11-26	2025-09-29	OXO	Radiology	2	Traditional/Hardware
K251674	Fenom Flo_x0099_ FeNO Monitoring System	Mgc Diagnostics Corporation	2025-11-26	2025-05-30	MXA	Clinical Toxicology	2	Traditional/Hardware
K250635	FEops HEARTguide Simulation Application	Feops NV	2025-11-25	2025-03-03	QQI	Cardiovascular	2	Traditional/Hardware
K251070	Akura Thrombectomy System	Akura Medical	2025-11-25	2025-04-07	QEW	Cardiovascular	2	Traditional/Hardware
K252253	Geistlich Mucograft® /Geistlich Mucograft® Seal; Geistlich Fibro-Gide®	Geistlich Pharma AG	2025-11-25	2025-07-21	NPL	Dental	2	Traditional/Hardware
K253365	LuxCreo Flexible Partial Denture Resin	Luxcreo, Inc.	2025-11-25	2025-09-30	EBI	Dental	2	Traditional/Hardware
K252762	HALO AP Dx	Indica Labs, LLC	2025-11-25	2025-08-29	QKQ	Pathology	2	Traditional/Hardware
K251932	Spectra Platinum	Uzinmedicare Co., Ltd.	2025-11-25	2025-06-24	HGX	Obstetrics/Gynecology	2	Traditional/Hardware
K251550	NX01 (NX01)	Naox Technologies Sas	2025-11-25	2025-05-21	OMC	Neurology	2	Traditional/Hardware
K252289	Eva Scalp Cooling System	Stemtech Medical Devices Private Limited	2025-11-25	2025-07-23	PMC	General, Plastic Surgery	2	Traditional/Hardware
K252161	Hushd Avera	Good Sleep CO Pte , Ltd.	2025-11-25	2025-07-10	LRK	Dental	2	Traditional/Hardware
K253344	BELLUS-Q	Speclipse, Inc.	2025-11-25	2025-09-30	GEX	General, Plastic Surgery	2	Traditional/Hardware
K252610	ZSFab Lumbar Interbody System	Zsfab, Inc.	2025-11-25	2025-08-18	MAX	Orthopedic	2	Traditional/Hardware
K252555	Medusa Orthopedics Boa External Fixation System	Medusa Orthopedics, LLC	2025-11-25	2025-08-13	KTT	Orthopedic	2	Traditional/Hardware
K252004	enCore Night Guard	Encore Guards	2025-11-25	2025-06-27	OBR	Unknown	U	Traditional/Hardware
K253219	LeafPure-Echo (LM-LPNdA)	Shenzhen Leaflife Technology Co., Ltd.	2025-11-25	2025-09-29	GEX	General, Plastic Surgery	2	Traditional/Hardware
K252889	Single Use 3-Lumen Needle Knife V (KD-V441M, KD-V451M)	Olympus Medical Systems Corporation	2025-11-25	2025-09-10	KNS	Gastroenterology, Urology	2	Traditional/Hardware
K251798	RCT700	Ray Co., Ltd.	2025-11-25	2025-06-12	OAS	Radiology	2	Traditional/Hardware
K252771	Holmium Laser System (Potent HP90); Holmium Laser System (Potent HP100); Holmium Laser System (Potent HP9120); Holmium Laser System (Potent HP140); Holmium Laser System (Potent HP150)	Guangzhou Potent Medical Equipment Joint-Stock Co., Ltd.	2025-11-24	2025-09-02	GEX	General, Plastic Surgery	2	Traditional/Hardware
K252688	Transcutaneous Electrical Nerve Stimulator (RJTENS-2)	Bozhou Rongjian Medical Appliance Co., Ltd.	2025-11-24	2025-08-26	NUH	Neurology	2	Traditional/Hardware
K252704	F Care RF System (00MEDRF4000US, 05RAFAELOPROBE, 05SPHERAPROBE, 06OUTPUTKAB, 06Pedal1St)	F Care Systems USA, LLC	2025-11-24	2025-08-27	GEI	General, Plastic Surgery	2	Traditional/Hardware
K252787	Thulium Fiber Laser System (TFL-A); Thulium Fiber Laser System (TFL-B)	Guangzhou Potent Medical Equipment Joint-Stock Co., Ltd.	2025-11-24	2025-09-02	GEX	General, Plastic Surgery	2	Traditional/Hardware
K253407	NeVa PV Thrombectomy Device	Vesalio, Inc.	2025-11-24	2025-09-30	QEX	Cardiovascular	2	Traditional/Hardware
K252509	AlphaVac Multipurpose Mechanical Aspiration System F1885	AngioDynamics, Inc.	2025-11-24	2025-08-08	QEZ	Cardiovascular	2	Traditional/Hardware
K250634	BCM2-Body Composition Monitor	Fresenius Medical Care Renal Therapies Group, LLC	2025-11-24	2025-03-03	DSB	Cardiovascular	2	Traditional/Hardware
K242503	Trilly Pediatric Oxygenator with Integrated Arterial Filter (US5232)	Eurosets Srl	2025-11-24	2024-08-22	DTZ	Cardiovascular	2	Traditional/Hardware
K250769	Dakota LP System	Precision Spine, Inc.	2025-11-24	2025-03-13	ODP	Orthopedic	2	Traditional/Hardware
K251631	The BAG manual resuscitator and accessories	Laerdal Medical AS	2025-11-24	2025-05-28	BTM	Anesthesiology	2	Traditional/Hardware
K250927	KARL STORZ Cholangiography Set	Karl Storz SE & CO. KG	2025-11-22	2025-03-28	GCJ	Gastroenterology, Urology	2	Traditional/Hardware
K252696	LEGACY	Phasor Health, LLC	2025-11-21	2025-08-27	HBG	Neurology	2	Traditional/Hardware
K252666	Articulator Arthroscopic Bur	Joint Preservation Innovations, LLC	2025-11-21	2025-08-25	HRX	Orthopedic	2	Traditional/Hardware
K251205	Atlantis® Abutments in Titanium for Straumann BLX and Neodent GM Implants	Dentsply Sirona	2025-11-21	2025-04-18	NHA	Dental	2	Traditional/Hardware
K250700	Pen Injector Needle 32.5	Terumo Corporation	2025-11-21	2025-03-07	FMI	General Hospital	2	Traditional/Hardware
K250560	BEE HA	NGMedical GmbH	2025-11-21	2025-02-25	ODP	Orthopedic	2	Traditional/Hardware
K251856	Li-Battery Powered OTC TENS/EMS Combination Stimulator, Model Z4	Everyway Medical Instruments Co.,Ltd	2025-11-21	2025-06-17	NUH	Neurology	2	Traditional/Hardware
K252070	Ceribell Infant Seizure Detection Software	Ceribell, Inc.	2025-11-21	2025-07-01	OMB	Neurology	2	Traditional/Hardware
K251607	Oxygen Concentrator (J5A)	Foshan Kycare Medical Equipment Co., Ltd.	2025-11-21	2025-05-27	CAW	Anesthesiology	2	Traditional/Hardware
K250714	FluoroDose Varnish	Centrix, Inc.	2025-11-21	2025-03-10	LBH	Dental	2	Traditional/Hardware
K252686	EffortMed PEEK Cages & Corpectomy Cages	Effortmed, LLC	2025-11-21	2025-08-26	ODP	Orthopedic	2	Traditional/Hardware
K251293	CardioVision	Icardio.Ai	2025-11-21	2025-04-25	QUO	Cardiovascular	2	Traditional/Hardware
K251506	Nelli (Version 7.11)	Neuro Event Labs OY	2025-11-21	2025-05-16	POS	Neurology	2	Traditional/Hardware
K250586	Prospera Spectruum Negative Pressure Wound Therapy Black Foam Kits and White Foam Accessory	Deroyal Industries, Inc.	2025-11-21	2025-02-27	OMP	General, Plastic Surgery	2	Traditional/Hardware
K251849	StaClear Syringe (SC250AN); StaClear Syringe (SC250LS); StaClear Syringe (SC250LL)	Staclear, Inc.	2025-11-21	2025-06-16	QLY	General Hospital	2	Traditional/Hardware
K252590	Powered Mobility Scooter (PMS105, GUT177, GCAT047)	Intradin (Shanghai) Machinery Co., Ltd.	2025-11-21	2025-08-15	INI	Physical Medicine	2	Traditional/Hardware
K253681	TERA HARZ Hard Denture (THD-C-500); TERA HARZ Hard Denture (THD-C-1000); TERA HARZ Hard Denture (THD-LP-500); TERA HARZ Hard Denture (THD-LP-1000); TERA HARZ Hard Denture (THD-P-500); TERA HARZ Hard Denture (THD-P-1000); TERA HARZ Hard Denture (THD-CP-500); TERA HARZ Hard Denture (THD-CP-1000)	Graphy, Inc.	2025-11-21	2025-11-21	EBI	Dental	2	Traditional/Hardware
K242606	Nuvis® Wireless HD Camera System (Nuvis-2K)	Integrated Endoscopy, Inc.	2025-11-20	2024-08-30	GCJ	Gastroenterology, Urology	2	Traditional/Hardware
K253324	UltraPrint-Dental Denture UV	Guangzhou Heygears IMC., Inc.	2025-11-20	2025-09-30	EBI	Dental	2	Traditional/Hardware
K252846	TaperSet_x0099_ Hip System	Shalby Advanced Technologies, Inc. Dba Consensus Orthopedics	2025-11-20	2025-09-08		Unknown		Traditional/Hardware
K253123	CuRAS hybrid	Classys, Inc.	2025-11-20	2025-09-25	GEX	General, Plastic Surgery	2	Traditional/Hardware
K250643	Disposable Polymer Ligation Clips	Hangzhou Kangji Medical Instrument Co., Ltd.	2025-11-20	2025-03-04	FZP	General, Plastic Surgery	2	Traditional/Hardware
K253007	Laser Fiber (PT-OF-A-S); Laser Fiber (PT-OF-B-S); Laser Fiber (PT-OF-C-S); Laser Fiber (PT-OF-D-S); Laser Fiber (PT-OF-E-S); Laser Fiber (PT-OF-F-S)	Guangzhou Potent Medical Equipment Joint-Stock Co., Ltd.	2025-11-20	2025-09-19	GEX	General, Plastic Surgery	2	Traditional/Hardware
K251904	VascuChek Kit, VascuChek Transceiver, VascuChek Clinical Probe, VascuChek Speaker Dock (VC-KIT-02, VC-TRX-02, VC-CP-01, VC-SD-01); VascuChek Kit, VascuChek Transceiver, VascuChek Surgical Probe, VascuChek Speaker Dock (VC-KIT-02, VC-TRX-02, VC-SP-01, VC-SD-01)	Remington Medical, Inc.	2025-11-20	2025-06-20	DPW	Cardiovascular	2	Traditional/Hardware
K251365	OptumSI Implant System	Si Solutions, LLC	2025-11-20	2025-05-01	OUR	Orthopedic	2	Traditional/Hardware
K253190	CORUS-LX Implant	Providence Medical Technology, Inc.	2025-11-20	2025-09-26	MRW	Unknown	U	Traditional/Hardware
K252625	The Response Ortho Smart Fixator - Hexapod System	Response Ortho Solutions, LLC	2025-11-20	2025-08-19	KTT	Orthopedic	2	Traditional/Hardware
K253105	HardyDisk AST Cefiderocol 30µg (FDC30)	Hardy Diagnostics	2025-11-20	2025-09-24	JTN	Microbiology	2	Traditional/Hardware
K253070	Namic Radial Arm Band, 23 cm (DYNJRADBAND); Namic Radial Arm Band, 26 cm (DYNJRADBANDL)	Medline Industries, LP	2025-11-20	2025-09-23	DXC	Cardiovascular	2	Traditional/Hardware
K243753	cobas liat Bordetella panel nucleic acid test	Roche Molecular Systems, Inc.	2025-11-20	2024-12-05	OZZ	Microbiology	2	Traditional/Hardware
K252884	Guided Aarhus Applicator Set	Varian Medical Systems	2025-11-19	2025-09-10	JAQ	Radiology	2	Traditional/Hardware
K250912	IntelliSep Test	Cytovale, Inc.	2025-11-19	2025-03-27	QUT	Microbiology	2	Traditional/Hardware
K242603	MyPAO SA guides	Medacta International S.A.	2025-11-19	2024-08-30	PBF	Orthopedic	2	Traditional/Hardware
K253197	ATTUNE_x0099_ Total Knee System; ATTUNE_x0099_ Revision Sleeve LPS_x0099_ Femoral Adaptors	Depuy Ireland UC	2025-11-19	2025-09-26	JWH	Orthopedic	2	Traditional/Hardware
K252661	SternaFuse Ti Fixation System	Fusion Innovations, LLC	2025-11-19	2025-08-22	HRS	Orthopedic	2	Traditional/Hardware
K250651	OptiPAP Junior Flexi Tube US (OPTIPAPFUS); OptiPAP Junior Nasal Prongs XXS (OPTIPAPPXXS); OptiPAP Junior Nasal Prongs XS (OPTIPAPPXS); OptiPAP Junior Nasal Prongs S (OPTIPAPPS); OptiPAP Junior Nasal Prongs M (OPTIPAPPM); OptiPAP Junior Nasal Prongs L (OPTIPAPPL); OptiPAP Junior Nasal Prongs XL (OPTIPAPPXL); OptiPAP Junior Nasal Mask XXS (OPTIPAPMXXS); OptiPAP Junior Nasal Mask XS (OPTIPAPMXS); Op…	Fisher &Paykel Healthcare , Ltd.	2025-11-19	2025-03-04	SGR	Anesthesiology	2	Traditional/Hardware
K251910	Focal One®	Edap Technomed, Inc.	2025-11-19	2025-06-20	PLP	Gastroenterology, Urology	2	Traditional/Hardware
K250642	LUOFUCON® Skin and Wound Cleanser (Spray, Mist, Squeeze, Bottle.)	Huizhou Foryou Medical Devices Co., Ltd.	2025-11-19	2025-03-04	FRO	Unknown	U	Traditional/Hardware
K253073	LED Light Therapy Device (SG-FSM, SG-NK, SG-CT)	Sunglor Technology Co., Ltd.	2025-11-19	2025-09-23	OHS	General, Plastic Surgery	2	Traditional/Hardware
K252642	Microcurrent Facial Device (CEC101, EEI101)	Shenzhen Dachi Communication Co., Ltd.	2025-11-19	2025-08-21	OHS	General, Plastic Surgery	2	Traditional/Hardware
K251693	Unimed Reusable SpO2 Sensors (-75 Series) (U410-75); Unimed Reusable SpO2 Sensors (-75 Series) (U110-75); Unimed Reusable SpO2 Sensors (-75 Series) (U410S-75); Unimed Reusable SpO2 Sensors (-75 Series) (U110S-75); Unimed Reusable SpO2 Sensors (-75 Series) (U210S-75)	Unimed Medical Supplies, Inc.	2025-11-18	2025-06-02	DQA	Cardiovascular	2	Traditional/Hardware
K253411	Miniature Telescope for Urology (27033AA)	Karl Storz SE & CO. KG	2025-11-18	2025-09-30	FGB	Gastroenterology, Urology	2	Traditional/Hardware
K252729	Universal Spinal System	Double Medical Technology, Inc.	2025-11-18	2025-08-28	NKB	Orthopedic	2	Traditional/Hardware
K243981	Hexoskin Medical System (7100-00016)	Carre Technologies, Inc.	2025-11-18	2024-12-23	DXH	Cardiovascular	2	Traditional/Hardware
K252818	Dexcom Smart Basal	Dexcom, Inc.	2025-11-18	2025-09-04	QRX	Clinical Chemistry	2	Traditional/Hardware
K252636	Fluido Compact System	The Surgical Company International B.V.	2025-11-18	2025-08-20	LGZ	General Hospital	2	Traditional/Hardware
K252550	SAFElife T-Cup Multi-Drug Urine Test Cup; SAFElife T-Cup Multi-Drug Urine Test Cup Dx	Guangzhou Wondfo Biotech Co., Ltd.	2025-11-18	2025-08-13	NFT	Clinical Toxicology	2	Traditional/Hardware
K251695	Unimed Reusable SpO2 Sensors (-06 Series) (U403S-06); Unimed Reusable SpO2 Sensors (-06 Series) (U203S-06); Unimed Reusable SpO2 Sensors (-06 Series) (U103S-06)	Unimed Medical Supplies, Inc.	2025-11-18	2025-06-02	DQA	Cardiovascular	2	Traditional/Hardware
K253423	ToeJack MIS Bunion System	Nvision Biomedical Technologies, Inc.	2025-11-18	2025-09-25	HRS	Orthopedic	2	Traditional/Hardware
K252521	LifeStyles® HydraFeel Natural Rubber Latex Condom	Suretex Limited	2025-11-18	2025-08-11	HIS	Obstetrics/Gynecology	2	Traditional/Hardware
K252281	ulricheasyINJECT Max 2M (XD 10140); ulricheasyINJECT Max 3 (XD 10150); ulricheasyINJECT Max 3 (XD 10180)	Ulrich GmbH & Co. KG	2025-11-18	2025-07-22	IZQ	Cardiovascular	2	Traditional/Hardware
K251141	Powder Free Nitrile Patient Examination Glove, Blue colored, Non-sterile Tested for Use with Chemotherapy Drugs and Fentanyl Citrate; Powder Free Nitrile Patient Examination Glove, Black colored, Non-sterile Tested for Use with Chemotherapy Drugs and Fentanyl Citrate	Mercator Medical (Thailand), Ltd.	2025-11-17	2025-04-14	LZA	General Hospital	1	Traditional/Hardware
K250588	Access Rubella IgG	Beckman Coulter, Inc.	2025-11-17	2025-02-27	LFX	Microbiology	2	Traditional/Hardware
K251566	TS-RF Generator (STS10)	Starmed Co., Ltd.	2025-11-17	2025-05-22	GEI	General, Plastic Surgery	2	Traditional/Hardware
K252330	DeepRESP	Nox Medical Ehf	2025-11-17	2025-07-25	OLZ	Neurology	2	Traditional/Hardware
K252792	PM2_x0099_ System with ECGuide_x0099_ Connector	Piccolo Medical, Inc.	2025-11-17	2025-09-02	LJS	General Hospital	2	Traditional/Hardware
K251659	Mesh Nebulizer (H6)	Qingdao Future Medical Technology Co., Ltd.	2025-11-14	2025-05-30	CAF	Anesthesiology	2	Traditional/Hardware
K251756	Sterilization Trays	Paragon Implant Mfg., LLC	2025-11-14	2025-06-09	KCT	General Hospital	2	Traditional/Hardware
K251821	ARC-EX System	Onward Medical, Inc.	2025-11-14	2025-06-13	SDO	Physical Medicine	2	Traditional/Hardware
K250865	KLS Martin IPS Forearm System	KLS-Martin L.P.	2025-11-14	2025-03-21	HRS	Orthopedic	2	Traditional/Hardware
DEN250015	Neurolyser XR (NXR100)	Fusmobile, Inc.	2025-11-14	2025-04-25	SGN	Neurology	2	Traditional/Hardware
K251538	Status_x0099_ COVID-19/Flu A&B	Princeton BioMeditech Corp.	2025-11-14	2025-05-19	SCA	Microbiology	2	Traditional/Hardware
K250471	AquaC UNO H	Fresenius Medical Care Renal Therapies Group, LLC	2025-11-14	2025-02-18	FIP	Gastroenterology, Urology	2	Traditional/Hardware
K251872	Biomoneta Avata Rx	Biomoneta Research Private Limited	2025-11-14	2025-06-18	FRF	General Hospital	2	Traditional/Hardware
K250501	System Sophi	This AG	2025-11-14	2025-02-20	HQC	Ophthalmic	2	Traditional/Hardware
K252627	Lyme-ID IgG Test; Bio-ID800	Inanovate, Inc.	2025-11-14	2025-08-20	LSR	Microbiology	2	Traditional/Hardware
K252308	LED Beauty Mask (RLBXX)	Atop Lighting Co., Ltd.	2025-11-13	2025-07-24	OHS	General, Plastic Surgery	2	Traditional/Hardware
K252592	TELLTALE Electrosurgical Guidewire System	Telltale, LLC	2025-11-13	2025-08-15	SGO	Cardiovascular	2	Traditional/Hardware
K252949	Geminus Volar Distal Radius Plating System	Skeletal Dynamics, Inc.	2025-11-13	2025-09-16	HRS	Orthopedic	2	Traditional/Hardware
K251314	Rosa® Knee System	Orthosoft Inc. (d/b/a) Zimmer CAS	2025-11-13	2025-04-28	OLO	Neurology	2	Traditional/Hardware
K251842	Dental Computed Tomography X-ray System	Fussen Technology Co., Ltd.	2025-11-13	2025-06-16	OAS	Radiology	2	Traditional/Hardware
K252271	Hemoclip	Hangzhou AGS MedTech Co., Ltd.	2025-11-12	2025-07-21	PKL	Gastroenterology, Urology	2	Traditional/Hardware
K251833	EMPOWR Acetabular® Liner Extension	Encore Medical, L.P.	2025-11-12	2025-06-16	LPH	Orthopedic	2	Traditional/Hardware
K253290	XSTAT P15	Revmedx, Inc.	2025-11-12	2025-09-29	PGZ	General, Plastic Surgery	2	Traditional/Hardware
K243897	PDS_x0099_ Plus Antibacterial (Polydioxanone) Sterile Synthetic Absorbable Surgical Suture	Ethicon, Inc.	2025-11-12	2024-12-19	NEW	General, Plastic Surgery	2	Traditional/Hardware
K252959	WRISTAR MultiAx Distal Radius Kit	Intrauma S.P.A	2025-11-12	2025-09-16	HRS	Orthopedic	2	Traditional/Hardware
K251336	VISERA ELITE III Video System Center Olympus OTV-S700 (OTV-S700); VISERA ELITE III Light Source Olympus CLL-S700 (CLL-S700); 4K Camera Head Olympus CH-S700-XZ-EA (CH-S700-XZ-EA)	Olympus Medical Systems Corp.	2025-11-12	2025-04-30	OWN	Gastroenterology, Urology	2	Traditional/Hardware
K243715	Synthes Patient Specific Implants	Synthes GmbH	2025-11-12	2024-12-02	GXN	Neurology	2	Traditional/Hardware
K252327	CMORE® CT System; CMORE® CT System Navigated Instruments	Icotec AG	2025-11-12	2025-07-25	NKG	Orthopedic	2	Traditional/Hardware
K252287	Symani Surgical System	Medical Microinstruments, Inc.	2025-11-10	2025-07-23	SAQ	General, Plastic Surgery	2	Traditional/Hardware
K252573	KLS Martin Cranial Implants - MR Conditional; K944565: KLS-Martin Micro Osteosynthesis System (1.5MM); K971297: KLS Martin Centre-Drive Drill-Free Screw; K060177: KLS Martin Rigid Fixation - Sterile; K062570: Individual Patient Solutions - Ti (IPS-Ti); K072707: Individual Patient Solutions - PEEK (IPS-PEEK) ; K151382: Individual Patient Solutions - (IPS-PEEK) - STERILE	KLS-Martin L.P.	2025-11-10	2025-08-14	GXN	Neurology	2	Traditional/Hardware
K251006	NeVasc Aspiration System	Vesalio, Inc.	2025-11-10	2025-04-01	NRY	Cardiovascular	2	Traditional/Hardware
K251702	IntelliVue Patient Monitor MX750; IntelliVue Patient Monitor MX850; IntelliVue 4-Slot Module Rack FMX-4 (866471 866470 866468 )	Philips Medizin Systeme Böblingen GmbH	2025-11-10	2025-06-02	MHX	Cardiovascular	2	Traditional/Hardware
K252560	Atlas Spine HiRISE_x0099_ Expandable Cervical Corpectomy System	Atlas Spine, Inc.	2025-11-10	2025-08-13	PLR	Orthopedic	2	Traditional/Hardware
K252474	Withings BeamO (SCT02)	Withings	2025-11-10	2025-08-06	DPS	Cardiovascular	2	Traditional/Hardware
K252570	EzSensor HD, EzSensor UHD	Qpix Solutions, Inc.	2025-11-10	2025-08-14	MUH	Dental	2	Traditional/Hardware
K251596	Lunderquist Extra Stiff Wire Guide	William Cook Europe Aps	2025-11-09	2025-05-27	DQX	Cardiovascular	2	Traditional/Hardware
K250739	Primeprint Direct Aligner	Dreve Dentamid GmbH	2025-11-07	2025-03-11	NXC	Dental	2	Traditional/Hardware
K252564	Medical Diode Laser Systems (VeinCure)	Baoding Te'Anzhou Electronic Technology Co., Ltd.	2025-11-07	2025-08-14	GEX	General, Plastic Surgery	2	Traditional/Hardware
K253513	MultiMatch Flow Chameleon AntiMicrobial Composite	Premier Dental Products Company	2025-11-07	2025-11-06	EBF	Dental	2	Traditional/Hardware
K251295	ulrichINJECT CT Motion (XD 8000)	Ulrich GmbH & Co. KG	2025-11-07	2025-04-25	IZQ	Cardiovascular	2	Traditional/Hardware
K253039	AUTO KERATO-REFRACTO TONOMETER TRK-3 OMNIA	Topcon Corporation	2025-11-07	2025-09-22	HKX	Ophthalmic	2	Traditional/Hardware
K251129	S.I.N. Tapered Pro Conical Zygoma Implant System	S.I.N. Implant System Ltda	2025-11-07	2025-04-11	DZE	Dental	2	Traditional/Hardware
K243131	Triathlon Pro	Sigma Biomedical	2025-11-07	2024-09-30	NUH	Neurology	2	Traditional/Hardware
K251441	Inion CPS 1.5 Baby Bioabsorbable Fixation System; Inion CPS 1.5/2.0/2.5 Bioabsorbable Fixation System	Inion OY	2025-11-07	2025-05-09	JEY	Dental	2	Traditional/Hardware
K252519	CO2 Laser Therapy System (K106)	Hebei Keylaser Sci-Tech Co.,Ltd	2025-11-07	2025-08-11	GEX	General, Plastic Surgery	2	Traditional/Hardware
K251004	Dual-Mode Mobile C-Arm (Geelin500A, Geelin500M)	Hefei Chimed Intelligent Machine Co., Ltd.	2025-11-06	2025-04-01	OXO	Radiology	2	Traditional/Hardware
K250423	mb-FIX Cranial Stabilization Systems	Medical Bees GmbH	2025-11-06	2025-02-14	HBL	Neurology	2	Traditional/Hardware
K252515	Q-Switched Nd:Yag laser (K690)	Hebei Keylaser Sci-Tech Co.,Ltd	2025-11-06	2025-08-11	GEX	General, Plastic Surgery	2	Traditional/Hardware
K253074	Tandem Mobi insulin pump with interoperable technology	Tandem Diabetes Care, Inc.	2025-11-06	2025-09-23	QFG	Clinical Chemistry	2	Traditional/Hardware
K251555	Ultra_x0099_ Compression Screw System	Pace Surgical	2025-11-06	2025-05-21	HWC	Orthopedic	2	Traditional/Hardware
K252133	Adaptix Ortho350	Adaptix Limited	2025-11-06	2025-07-07	IZF	Radiology	2	Traditional/Hardware
K251792	Stereotaxis GenesisX RMN with Navigant _x0099_ Workstation (NWS)	Stereotaxis, Inc.	2025-11-06	2025-06-11	DXX	Cardiovascular	2	Traditional/Hardware
K250815	Hubly Drill (H100)	Hubly, Inc.	2025-11-06	2025-03-17	HBE	Neurology	2	Traditional/Hardware
K252469	MAGNABOND SE; MAGNABOND UNIVERSAL; MAGNABOND UNIVERSAL DCA	Dmp Dental Industry S.A.	2025-11-06	2025-08-06	KLE	Dental	2	Traditional/Hardware
K253478	Motive_x0099_ Muscle Stimulator for Lower Back (OT01-1003)	Motive Health, Inc.	2025-11-06	2025-10-14	NGX	Physical Medicine	2	Traditional/Hardware
K252845	Venus Nova (FP-2001)	Venus Concept, Inc.	2025-11-06	2025-09-08	GEI	General, Plastic Surgery	2	Traditional/Hardware
K252418	Catalyst F1x Shoulder System	Catalyst Orthoscience, Inc.	2025-11-06	2025-08-01	KWS	Orthopedic	2	Traditional/Hardware
K252514	EVAC-MRI	Phasor Health, LLC	2025-11-05	2025-08-11	JXG	Neurology	2	Traditional/Hardware
K252677	Polyshield Safety IV Catheters	Poly Medicure Limited	2025-11-05	2025-08-25	FOZ	General Hospital	2	Traditional/Hardware
K250375	Allure Hip Stem and Intramedullary Plugs	Waldemar Link GmbH & Co. KG	2025-11-05	2025-02-10	MEH	Orthopedic	2	Traditional/Hardware
K250599	ExcelsiusGPS_x0099_ Instruments	Globus Medical, Inc.	2025-11-05	2025-02-28	OLO	Neurology	2	Traditional/Hardware
K250363	Depth Electrode (RSDE-08); Depth Electrode (RSDE-10); Depth Electrode (RSDE-12); Depth Electrode (RSDE-14); Depth Electrode (RSDE-16); Depth Electrode (RSDE-16F); Depth Electrode (RSDE-08S); Depth Electrode (RSDE-10S); Depth Electrode (RSDE-12S); Depth Electrode (RSDE-14S); Depth Electrode (RSDE-16S); Depth Electrode (RSDE-16G); Depth Electrode (RSDE-18); Depth Electrode (RSDE-18F); Depth Electro…	Beijing Sinovation Medical Technology Co., Ltd.	2025-11-05	2025-02-10	GZL	Neurology	2	Traditional/Hardware
K250376	ViVY	Viatherm Therapeutics, LLC	2025-11-05	2025-02-10	IMJ	Physical Medicine	2	Traditional/Hardware
K251303	Tamburo Thulium Fiber Laser System	Menovex Medical Technology (Shenzhen) Co., Ltd.	2025-11-04	2025-04-28	GEX	General, Plastic Surgery	2	Traditional/Hardware
K252964	PRIMED Surgical and Procedure Masks	Primed Medical Products, Inc.	2025-11-04	2025-09-17	FXX	General, Plastic Surgery	2	Traditional/Hardware
K250853	Merit Syringe	Merit Medical Systems, Inc.	2025-11-04	2025-03-21	FMF	General Hospital	2	Traditional/Hardware
K251709	MedCAD® AccuStride_x0099_ System	Medcad	2025-11-04	2025-06-03	PBF	Orthopedic	2	Traditional/Hardware
K252740	Voyant® Open Fusion Device (EB240/Open Fusion)	Applied Medical Resources Corp.	2025-11-04	2025-08-28	GEI	General, Plastic Surgery	2	Traditional/Hardware
K252664	GMReis Suture Anchors	GM Dos Reis Industria e Comercio Ltda.	2025-11-04	2025-08-22	MBI	Orthopedic	2	Traditional/Hardware
K250576	Flexx Junior (FLX-J00, FLX-J50)	Karma Mobility Co, Ltd.	2025-11-04	2025-02-27	IOR	Physical Medicine	1	Traditional/Hardware
K251626	Midmark Dental Delivery System	Midmark Corporation	2025-11-03	2025-05-28	EIA	Dental	1	Traditional/Hardware
K252481	cobas CMV	Roche Molecular Systems, Inc.	2025-11-03	2025-08-07	PAB	Microbiology	2	Traditional/Hardware
K252484	cobas HCV	Roche Molecular Systems, Inc.	2025-11-03	2025-08-07	MZP	Microbiology	2	Traditional/Hardware
K252458	Kyphoplasty Balloon Dilatation Catheters	Shanghai Lange Medtech Co., Ltd.	2025-11-03	2025-08-05	HRX	Orthopedic	2	Traditional/Hardware
K251381	Ceribell Instant EEG Headcap (Small: C251, Medium: C252)	Ceribell, Inc.	2025-10-31	2025-05-02	GXY	Neurology	2	Traditional/Hardware
K250338	MSS - Humeral reverse liners extension	Medacta International S.A.	2025-10-31	2025-02-06	PHX	Orthopedic	2	Traditional/Hardware
K251547	DESS Dental Smart Solutions	Terrats Medical SL	2025-10-31	2025-05-21	NHA	Dental	2	Traditional/Hardware
K250917	Flexible Ureterorenoscope system (Electronic Endoscope Image Processor, model: SP-TXCLQ12.1, Flexible Ureterorenoscope, model: SP-SNGSYJ 2.0, SP-SNGSYJ 2.2, SP-SNGSYJ 2.5, SP-SNGSYJ 2.8)	Shenzhen Sanping Image Technology Co., Ltd.	2025-10-31	2025-03-27	FGB	Gastroenterology, Urology	2	Traditional/Hardware
K252412	Voyant® Electrosurgical Generator (EA030/Electrosurgical Generator)	Applied Medical Resources Corporation	2025-10-31	2025-08-01	GEI	General, Plastic Surgery	2	Traditional/Hardware
K252442	Kii Structural Balloon Access System	Applied Medical Resources Corp.	2025-10-31	2025-08-04	GCJ	Gastroenterology, Urology	2	Traditional/Hardware
K252060	GREEN	Phasor Health, LLC	2025-10-31	2025-07-01	HBE	Neurology	2	Traditional/Hardware
K252160	Persyst 15 EEG Review and Analysis Software (Persyst 15 (P15))	Persyst Development, LLC	2025-10-31	2025-07-10	OMB	Neurology	2	Traditional/Hardware
K252777	Freedom Metaphyseal Cone Implants (Metaphyseal Cones)	Maxx Orthopedics, Inc.	2025-10-31	2025-09-02	MBH	Orthopedic	2	Traditional/Hardware
K253501	Hydro Print Premium Fast Set - 454g (1lb) (052037); Hydro Print Premium Regular Set - 454g (1lb) (052327); Chroma Print Premium Fast Set - 454g (1lb) (052457); Chroma Print Premium Regular Set - 454g (1lb) (051460); Perfil Pro - 454g (1lb) (056213); Perfil Pro+ - 454g (1lb) (056121); Perfil Pro Chroma - 454g (1lb) (056122); Hydro Print Premium Fast Set - Multi Pack (056205); Hydro Print Premium R…	Vigodent Indústria E Comercio Ltda	2025-10-31	2025-10-30	ELW	Dental	2	Traditional/Hardware
K250306	Chex-All Sterilization Pouches and Tubes	Propper Manufacturing Co., Inc.	2025-10-31	2025-02-03	FRG	General Hospital	2	Traditional/Hardware
DEN240074	Pulsenmore ES	Pulsenmore, Ltd.	2025-10-31	2024-12-11	SGJ	Radiology	2	Traditional/Hardware
K250358	BD Enteric Bacterial Panel for BD COR System, BD Enteric Bacterial Panel plus for BD COR System, and Enteric Bacterial Panel Diluent for BD COR System	Becton, Dickinson and Company	2025-10-31	2025-02-07	PCI	Microbiology	2	Traditional/Hardware
K251041	GripTract-GI_x0099_ Endoscopic Tissue Manipulator Upper GI Model GT-GS100	Actuated Medical, Inc.	2025-10-31	2025-04-03	FDS	Gastroenterology, Urology	2	Traditional/Hardware
K252088	Firebird SI Navigation System	Orthofix Us, LLC	2025-10-31	2025-07-02	OLO	Neurology	2	Traditional/Hardware
K253376	OBSIDIO_x0099_ Conformable Embolic (M0013972101010)	Boston Scientific Corporation	2025-10-30	2025-09-30	KRD	Cardiovascular	2	Traditional/Hardware
K252387	Simplexa_x0099_ COVID-19/ Flu A/B & RSV Direct (MOL4450); Simplexa_x0099_ COVID-19/ Flu A/B & RSV Positive Control Pack (MOL4460)	Diasorin Molecular, LLC	2025-10-30	2025-07-31	QOF	Microbiology	2	Traditional/Hardware
K253327	HANAROSTENT Esophagus Upper (CCC)	M.I. Tech Co., Ltd.	2025-10-30	2025-09-30	ESW	General, Plastic Surgery	2	Traditional/Hardware
K252607	AllTest Urinary Tract Infection Test	Hangzhou AllTest Biotech Co., Ltd.	2025-10-30	2025-08-18	JMT	Clinical Chemistry	1	Traditional/Hardware
K252752	ellacor System with Micro-Coring Technology	Cytrellis Biosystems, Inc.	2025-10-30	2025-08-29	QAI	General, Plastic Surgery	2	Traditional/Hardware
K252430	Freeprint® denture flex	Detax GmbH	2025-10-30	2025-08-01	EBI	Dental	2	Traditional/Hardware
K251686	Tornier Humeral Reconstruction System Max (Tornier HRS Max)	Tornier, Inc.	2025-10-30	2025-06-02	KWT	Orthopedic	2	Traditional/Hardware
K252046	Zoom System (Zoom 4S Catheter)	Imperative Care, Inc.	2025-10-30	2025-06-30	NRY	Cardiovascular	2	Traditional/Hardware
K250632	Arctx Cool Catheter Set	Arctx Medical	2025-10-30	2025-03-03	PLA	Cardiovascular	2	Traditional/Hardware
K243619	Niti-S Esophageal Stent; Esophageal TTS Stent	Taewoong Medical Co., Ltd.	2025-10-30	2024-11-22	ESW	General, Plastic Surgery	2	Traditional/Hardware
K250325	BD Alaris Pump Infusion Set	Carefusion (Bd)	2025-10-30	2025-02-05	FPA	General Hospital	2	Traditional/Hardware
K252529	Moses_x0099_ 200 D/F/L Laser Fiber (M0068130100); Moses_x0099_ 365 D/F/L Laser Fiber (M0068130110); Moses_x0099_ 550 D/F/L Laser Fiber (M0068130120)	Boston Scientific Corporation	2025-10-30	2025-08-11	GEX	General, Plastic Surgery	2	Traditional/Hardware
K251938	GEN5 and GEN5+ Dental Implant System	Paragon Implant Mfg., LLC	2025-10-30	2025-06-24	DZE	Dental	2	Traditional/Hardware
K253232	Seguin Annuloplasty Ring	Abbott Medical	2025-10-29	2025-09-29	KRH	Cardiovascular	2	Traditional/Hardware
K252697	3D Laparoscope	Guangdong Optomedic Technologies, Inc.	2025-10-29	2025-08-27	GCJ	Gastroenterology, Urology	2	Traditional/Hardware
K251772	Navilas Laser System 577sl (156691)	Od-Os GmbH	2025-10-29	2025-06-10	HQF	Ophthalmic	2	Traditional/Hardware
K253314	Freedom Infinia_x0099_ Total Knee System	Maxx Orthopedics, Inc.	2025-10-29	2025-09-30	JWH	Orthopedic	2	Traditional/Hardware
K253283	Momcozy Wearable Breast Pump (Model: BP334-, BP380-, BP420-, BP431-, BP400-, BP432-, BP434-)	Shenzhen Root Innovation Technology Co., Ltd.	2025-10-29	2025-09-29	HGX	Obstetrics/Gynecology	2	Traditional/Hardware
K253323	Protrieve Sheath	Inari Medical	2025-10-29	2025-09-30	QEW	Cardiovascular	2	Traditional/Hardware
K253355	Difiney Advanced Anti Snoring Device 4.0	Fissiontech, LLC	2025-10-29	2025-09-30	LRK	Dental	2	Traditional/Hardware
K253345	JARVIS Diaphyseal Stem Standard	FH Industrie	2025-10-29	2025-09-30	PHX	Orthopedic	2	Traditional/Hardware
K252314	Arthrex SutureTak Suture Anchor	Arthrex, Inc.	2025-10-29	2025-07-25	MBI	Orthopedic	2	Traditional/Hardware
K251643	Synchfix EVT	Wright Medical Technology, Inc. (Stryker Corporation)	2025-10-29	2025-05-29	HTN	Orthopedic	2	Traditional/Hardware
K253242	LCD Monitor (C1216W, C822W, C821W)	Shenzhen Beacon Display Technology Co., Ltd.	2025-10-29	2025-09-29	PGY	Radiology	2	Traditional/Hardware
K252416	AETOS Shoulder System Meta Humeral Prosthesis Size 0	Smith & Nephew, Inc.	2025-10-29	2025-08-01	KWS	Orthopedic	2	Traditional/Hardware
K250316	Meduloc Intramedullary Fracture Fixation (IFF) System	Meduloc, LLC	2025-10-29	2025-02-04	JDW	Orthopedic	2	Traditional/Hardware
K252393	VITROS Immunodiagnostic Products hs Troponin I Reagent Pack	Ortho-Clinical Diagnostics, Inc.	2025-10-29	2025-07-31	MMI	Clinical Chemistry	2	Traditional/Hardware
K250882	SANSA HSAT	Huxley Medical	2025-10-29	2025-03-24	MNR	Anesthesiology	2	Traditional/Hardware
K252390	Telescope Guide Extension Catheter	Medtronic, Ireland	2025-10-29	2025-07-31	DQY	Cardiovascular	2	Traditional/Hardware
K250618	Medi Lift Essential Eye Mask	Ya-Man, Ltd.	2025-10-29	2025-02-28	NFO	Neurology	2	Traditional/Hardware
K253300	Fine Osteotomy_x0099_	Bodycad Laboratories, Inc.	2025-10-28	2025-09-29	HRS	Orthopedic	2	Traditional/Hardware
K252351	UniSpace® TPLIF Cage	Cg Medtech Co., Ltd.	2025-10-28	2025-07-29	MAX	Orthopedic	2	Traditional/Hardware
K253399	Visions® PV .014P RX Digital IVUS Catheter ; Visions® PV .018 Digital IVUS Catheter	Volcano Corporation (Dba Philips Image Guided Therapy Device	2025-10-28	2025-09-30	OBJ	Cardiovascular	2	Traditional/Hardware
K252742	Navigated Instruments	Tyber Medical, LLC	2025-10-28	2025-08-28	OLO	Neurology	2	Traditional/Hardware
K252165	ZIRCONOMER P	Shofu Dental Corporation	2025-10-28	2025-07-10	EMA	Dental	2	Traditional/Hardware
K250275	PrecisePath_x0099_ Radiofrequency Puncture Generator and PrecisePath_x0099_ Footswitch	Baylis Medical Technologies, Inc.	2025-10-28	2025-01-31	GEI	General, Plastic Surgery	2	Traditional/Hardware
K252376	Yomi S Robotic System	Neocis, Inc.	2025-10-28	2025-07-30	PLV	Dental	2	Traditional/Hardware
K252629	Electric Breast Pump (HL-3058, F5112)	Fimilla (Shanghai) Maternity & Baby Articles Co., Ltd.	2025-10-27	2025-08-20	HGX	Obstetrics/Gynecology	2	Traditional/Hardware
K251331	Blood Pressure Monitor (B73, BE23T)	Shenzhen Jamr Technology Co., Ltd.	2025-10-27	2025-04-30	DXN	Cardiovascular	2	Traditional/Hardware
K251824	Patriot Duo	Patriot Laser, LLC	2025-10-27	2025-06-13	GEX	General, Plastic Surgery	2	Traditional/Hardware
K252467	Disposable Vinyl Examination Gloves	Viet Phu Trade and Import Export Co., Ltd.	2025-10-27	2025-08-06	LYZ	General Hospital	1	Traditional/Hardware
K251875	LifeScale Gram Negative Kit (LSGN) with the LifeScale AST system	Affinity Biosensors, LLC	2025-10-27	2025-06-18	SAN	Microbiology	2	Traditional/Hardware
K252630	Electric Breast Pump (HL-3060, F5113)	Fimilla (Shanghai) Maternity & Baby Articles Co., Ltd.	2025-10-27	2025-08-20	HGX	Obstetrics/Gynecology	2	Traditional/Hardware
K252053	VITA Multi-Function Head Brush (TB-2443F, TB-2442AF, TB-2343F, TB-2442F)	Touchbeauty Beauty & Health ( Shenzhen ) Co., Ltd	2025-10-27	2025-07-01	OHS	General, Plastic Surgery	2	Traditional/Hardware
K250297	TECHFIT Patient-Specific Cranial System	Techfit Digital Surgery, Inc.	2025-10-27	2025-01-31	GWO	Neurology	2	Traditional/Hardware
K250520	OsteoCentric Navigated Instruments System	Osteocentric Technologies, Inc.	2025-10-27	2025-02-21	OLO	Neurology	2	Traditional/Hardware
K253150	Cryon-X Cold Compression	Jkh Health Co., Ltd.	2025-10-24	2025-09-25	IRP	Physical Medicine	2	Traditional/Hardware
K251312	Vesalio Peripheral System	Vesalio, Inc.	2025-10-24	2025-04-28	QEZ	Cardiovascular	2	Traditional/Hardware
K253188	CoaguChek XS Plus System	Roche Diagnostics	2025-10-24	2025-09-26	GJS	Hematology	2	Traditional/Hardware
K253335	CD Horizon_x0099_ Spinal System	Medtronic Sofamor Danek USA, Inc.	2025-10-24	2025-09-30	NKB	Orthopedic	2	Traditional/Hardware
K250687	Cocoon Solo (DX-7020s)	Dexcowin Global, Inc.	2025-10-24	2025-03-06	MUH	Dental	2	Traditional/Hardware
K252044	Triathlon® Total Knee System - Triathlon® Gold Femoral Components	Howmedica Osteonics Corp., Dba Stryker Orthopaedics	2025-10-24	2025-06-30	MBH	Orthopedic	2	Traditional/Hardware
K252645	LumiGuide Equipment R2.1; LumiGuide Wire; LumiGuide 3D Hub	Philips Medical Systems Nederland B.V.	2025-10-24	2025-08-21	DQK	Cardiovascular	2	Traditional/Hardware
K252238	CoroFlow Cardiovascular System	Coroventis Research AB	2025-10-24	2025-07-17	DQK	Cardiovascular	2	Traditional/Hardware
K253129	Infinity_x0099_ OCT System	Medtronic Sofamor Danek USA, Inc.	2025-10-24	2025-09-25	NKG	Orthopedic	2	Traditional/Hardware
K250345	Medline Bag Decanter	Medline Industries, LP	2025-10-24	2025-02-06	LHI	General Hospital	2	Traditional/Hardware
K252646	Single-Use Fine Needle Biopsy (FNB) device (NA-U210H)	Olympus Medical Systems Corp.	2025-10-24	2025-08-21	FCG	Gastroenterology, Urology	2	Traditional/Hardware
K253377	Expandable Titanium PLIF/TLIF System	Spectrum Spine, Inc.	2025-10-24	2025-09-30	MAX	Orthopedic	2	Traditional/Hardware
K252730	Fule Spinal Fixation System	Beijing Fule Science & Technology Development Co., Ltd.	2025-10-24	2025-08-28	NKB	Orthopedic	2	Traditional/Hardware
K251372	VersaD Delivery Catheter	Unity Medical, Inc.	2025-10-24	2025-05-02	QJP	Cardiovascular	2	Traditional/Hardware
K250904	Atalante X	Wandercraft Sas	2025-10-24	2025-03-26	PHL	Physical Medicine	2	Traditional/Hardware
K253106	AngioVac Cannula	AngioDynamics, Inc.	2025-10-24	2025-09-24	DWF	Cardiovascular	2	Traditional/Hardware
K252357	Glucose2	Abbott Ireland	2025-10-24	2025-07-29	CFR	Clinical Chemistry	2	Traditional/Hardware
K253125	Parietene_x0099_ Flat Sheet Mesh	Medtronic - Sofradim Production	2025-10-24	2025-09-25	FTL	General, Plastic Surgery	2	Traditional/Hardware
K251784	Hushd Pro Z-Link	Good Sleep CO Pte , Ltd.	2025-10-24	2025-06-11	LRK	Dental	2	Traditional/Hardware
K251974	Arctic Sun Temperature Management System (Model 5000)	Medivance, Inc.	2025-10-24	2025-06-26	DWJ	Cardiovascular	2	Traditional/Hardware
K252425	Silatrix Oral Gel	Sa3, LLC	2025-10-23	2025-08-01	OLR	Unknown	U	Traditional/Hardware
K250861	Nitrile Powder Free Examination Glove Tested for Use with Chemotherapy Drugs, Fentanyl Citrate, Simulated Gastric Acid and Fentanyl in Simulated Gastric Acid (Black)	Hartalega NGC Sdn. Bhd.	2025-10-23	2025-03-21	LZA	General Hospital	1	Traditional/Hardware
K253100	MultiPulse TFL	Asclepion Laser Technologies GmbH	2025-10-23	2025-09-24	GEX	General, Plastic Surgery	2	Traditional/Hardware
K252345	Picosecond Laser Device (PF131-BI)	Risu Medical Technology Co., Ltd.	2025-10-23	2025-07-28	GEX	General, Plastic Surgery	2	Traditional/Hardware
K252931	Invisalign® Palatal Expander System	Align Technology, Inc.	2025-10-23	2025-09-15	NXC	Dental	2	Traditional/Hardware
K253226	UV5000W Handle	Uroviu Corporation	2025-10-23	2025-09-29	FAJ	Gastroenterology, Urology	2	Traditional/Hardware
K252309	PerQseal Introducers	Vivasure Medical Limited	2025-10-23	2025-07-24	DYB	Cardiovascular	2	Traditional/Hardware
K252384	DESS® Dental Smart Solutions	Terrats Medical SL	2025-10-23	2025-07-31	NHA	Dental	2	Traditional/Hardware
K252732	1927nm Thulium Laser System (PZ-DJG75-01, PZ-DJG75-02)	Zhengzhou PZ Laser Slim Technology Co., Ltd.	2025-10-23	2025-08-28	GEX	General, Plastic Surgery	2	Traditional/Hardware
K252569	Carrier XL Delivery Catheter	Balt USA, LLC	2025-10-22	2025-08-14	QJP	Cardiovascular	2	Traditional/Hardware
K253147	FIBERGRAFT_x0099_ BG Putty GPS Bone Graft Substitute FIBERGRAFT_x0099_ BG Putty Bone Graft Substitute FIBERGRAFT_x0099_ AERIDYAN_x0099_ Matrix Bone Graft Substitute FIBERGRAFT_x0099_ BG Matrix Bone Graft Substitute	Prosidyan, Inc.	2025-10-22	2025-09-25	MQV	Orthopedic	2	Traditional/Hardware
K252322	SIros-X System	Genesys Spine	2025-10-22	2025-07-25	OUR	Orthopedic	2	Traditional/Hardware
K251749	Flowflex Plus RSV + Flu A/B + COVID Home Test	ACON Laboratories, Inc.	2025-10-22	2025-06-06	SCA	Microbiology	2	Traditional/Hardware
K250955	XC11 ICE System, USA	Yorlabs, Inc.	2025-10-22	2025-03-31	OBJ	Cardiovascular	2	Traditional/Hardware
K251977	electric breast pump (FZ-P8); electric breast pump (YH-P8); electric breast pump (YH-P8X)	Ningbo Youhe Electrical Appliance Technology Co., Ltd.	2025-10-22	2025-06-27	HGX	Obstetrics/Gynecology	2	Traditional/Hardware
K251663	Giraffe OmniBed Carestation (CS1); Giraffe Incubator Carestation (CS1)	Datex-Ohmeda, Inc.	2025-10-22	2025-05-30	FMZ	General Hospital	2	Traditional/Hardware
K252329	QIAstat-Dx Gastrointestinal Panel 2; QIAstat-Dx GI Panel 2 Mini B&V; QIAstat-Dx GI Panel 2 Mini B	QIAGEN GmbH	2025-10-22	2025-07-25	PCH	Microbiology	2	Traditional/Hardware
K251289	WELLlife COVID-19 Antigen Test Rx	Guangzhou Wondfo Biotech Co., Ltd.	2025-10-22	2025-04-25	QVF	Microbiology	2	Traditional/Hardware
K253145	Pre-Sutured Tendon	Rti Surgical, Inc.	2025-10-22	2025-09-25	GAT	General, Plastic Surgery	2	Traditional/Hardware
K251185	Recana Thrombectomy Catheter System (FG014. FG015, FG016, FG017, FG018, FG019, FG020)	Intervene	2025-10-22	2025-04-16	QEW	Cardiovascular	2	Traditional/Hardware
K250666	Alegria Flash CTD Screen	Zeus Scientific	2025-10-22	2025-03-05	LLL	Immunology	2	Traditional/Hardware
K253144	Freedom® Total Knee System _x0096_ Titan PCK Components	Maxx Orthopedics, Inc.	2025-10-22	2025-09-25	JWH	Orthopedic	2	Traditional/Hardware
K251628	Mandibular Advancement Device L07	Dcstar, Inc.	2025-10-22	2025-05-28	LRK	Dental	2	Traditional/Hardware
K253033	Chemfort® 28-day 20 mm Vial Adaptor and 13 mm Convertor	Simplivia Healthcare , Ltd.	2025-10-21	2025-09-22	ONB	General Hospital	2	Traditional/Hardware
K250409	Disposable Balloon Catheter (B5-2Q); Disposable Balloon Catheter (B7-2Q); Disposable Balloon Catheter (B7-2LA)	Olympus Medical Systems Corporation	2025-10-21	2025-02-13	FGE	Gastroenterology, Urology	2	Traditional/Hardware
K252346	OLYMPIC Posterior Spinal Fixation System; MASADA Modular Spinal Fixation System	Astura Medical	2025-10-21	2025-07-28	NKB	Orthopedic	2	Traditional/Hardware
K231897	NeuroAlign software	Medivis, Inc.	2025-10-21	2023-06-28	HAW	Neurology	2	Traditional/Hardware
K253249	TriALTIS_x0099_ Spine System	Medos International SARL	2025-10-21	2025-09-29	NKB	Orthopedic	2	Traditional/Hardware
K253034	HemoSphere Stream Module	Edwards Lifesciences	2025-10-21	2025-09-22	DQK	Cardiovascular	2	Traditional/Hardware
K250887	Neuromuscular Transmission Monitor TOF3D (2510091)	MIPM Mammendorfer Institut für Physik und Medizin GmbH	2025-10-21	2025-03-25	KOI	Anesthesiology	2	Traditional/Hardware
K250126	ArtiSeal Vessel Sealing System - ArtiSeal Instruments (AS01M)	Livsmed, Inc.	2025-10-21	2025-01-17	GEI	General, Plastic Surgery	2	Traditional/Hardware
K250394	Fine TTO_x0099_	Bodycad Laboratories, Inc.	2025-10-21	2025-02-12	PBF	Orthopedic	2	Traditional/Hardware
K251838	Introducer Sheath Set	Cardiocycle Medical(Suzhou) Co., Ltd.	2025-10-21	2025-06-16	DYB	Cardiovascular	2	Traditional/Hardware
K253040	Aevumed FASE Suture Anchor	Aevumed, Inc.	2025-10-21	2025-09-22	MBI	Orthopedic	2	Traditional/Hardware
K253182	InkSpace Imaging Small Body Array (SBA12PH30x)	Inkspace Imaging, Inc.	2025-10-20	2025-09-26	MOS	Radiology	2	Traditional/Hardware
K252640	VereSee Optical Veres Needle and Endoscopic Camera	Freyja Healthcare, LLC	2025-10-20	2025-08-21	GCJ	Gastroenterology, Urology	2	Traditional/Hardware
K252155	AVAVA_x0099_ Skin Treatment System	Avava, Inc.	2025-10-20	2025-07-09	ONG	General, Plastic Surgery	2	Traditional/Hardware
K251414	Miracu_x0099_ Polydioxanone (PDO) Suture and Needle (MONO)	Feeltech Co., Ltd.	2025-10-20	2025-05-07	NEW	General, Plastic Surgery	2	Traditional/Hardware
K252277	Spiral Laminar Flow_x0099_ Vascular Arteriovenous Graft (AV0645)	Vascular Flow Technologies Limited	2025-10-20	2025-07-22	DSY	Cardiovascular	2	Traditional/Hardware
K252319	Q-Switched Nd: YAG Laser machine (LFS-C13U)	Sanhe Lefis Electronics Co., Ltd.	2025-10-20	2025-07-25	GEX	General, Plastic Surgery	2	Traditional/Hardware
K242827	A8 INTEGR8_x0099_ Porous Pedicle Screws	Allumin8, Inc.	2025-10-20	2024-09-18	NKB	Orthopedic	2	Traditional/Hardware
K251146	IntelliVue Patient monitors MX400, MX450, MX500, MX550	Philips Medizin Systeme Boeblingen GmbH	2025-10-17	2025-04-14	MHX	Cardiovascular	2	Traditional/Hardware
K251832	InZone IST Detachment System; IZDS Connecting Cable	Stryker Neurovascular	2025-10-17	2025-06-16	HCG	Neurology	2	Traditional/Hardware
K250159	Immunoglobulin Isotypes (GAM) for the EXENT Analyser; EXENT Analyser	The Binding Site Group , Ltd.	2025-10-17	2025-01-21	SGG	Immunology	2	Traditional/Hardware
K250145	Biopsy Port Adapter	Endosound, Inc.	2025-10-17	2025-01-21	ODC	Gastroenterology, Urology	2	Traditional/Hardware
K252266	S.I.N. Dental Implant System	S.I.N. Implant System Ltda	2025-10-17	2025-07-21	NHA	Dental	2	Traditional/Hardware
K250945	Single Use Preloaded Sphincterotome V (Distal Wire Guided) (KD-VC600 Series); Single Use Sphincterotome V (Distal Wire Guided) (KD-VC400 Series); Single Use 3-Lumen Sphincterotome (KD-V Series); Disposable Triple Lumen Sphincterotome (KD Series)	Olympus Medical Systems Corp.	2025-10-17	2025-03-28	KNS	Gastroenterology, Urology	2	Traditional/Hardware
K251673	X9 Ultrasound System	X9, Inc.	2025-10-17	2025-05-30	SGH	Radiology	2	Traditional/Hardware
K251282	StealthStation S8 Spine Software	Medtronic Navigation, Inc.	2025-10-17	2025-04-24	OLO	Neurology	2	Traditional/Hardware
K252254	Osteotomy Wedge System	Sinaptic Surgical	2025-10-17	2025-07-21	PLF	Orthopedic	2	Traditional/Hardware
DEN240076	Modius Lean	Neurovalens Limited	2025-10-17	2024-12-18	SFW	Gastroenterology, Urology	1	Traditional/Hardware
K251778	Remi Custom Night Guard	Remi	2025-10-17	2025-06-10	OBR	Unknown	U	Traditional/Hardware
K252075	Program insite® Powder-Free, Disposable Nitrile Exam Gloves	Program Insite, LLC	2025-10-17	2025-07-02	LZA	General Hospital	1	Traditional/Hardware
K250178	Adin Customized Abutments	Adin Dental Implant Systems , Ltd.	2025-10-17	2025-01-22	NHA	Dental	2	Traditional/Hardware
K250227	JOVS Electric Stimulation Beauty Device (JE2)	Shenzhen Qianyu Technology Co., Ltd.	2025-10-17	2025-01-27	NFO	Neurology	2	Traditional/Hardware
K250203	SureAx-Guide_x0099_	Sureax Medical, LLC	2025-10-17	2025-01-24	DQX	Cardiovascular	2	Traditional/Hardware
K250250	ADVIA Centaur Anti-Thyroid Peroxidase II	Siemens Healthcare Diagnostics, Inc.	2025-10-17	2025-01-28	JZO	Immunology	2	Traditional/Hardware
K251497	Elos Accurate Hybrid Base	Elos Medtech Pinol A/S	2025-10-16	2025-05-15	NHA	Dental	2	Traditional/Hardware
K250852	Coolfase	Asterasys Co., Ltd.	2025-10-16	2025-03-21	GEI	General, Plastic Surgery	2	Traditional/Hardware
K253024	ProZip Knotless Implant	Riverpoint Medical	2025-10-16	2025-09-19	GAT	General, Plastic Surgery	2	Traditional/Hardware
K251882	Uterine Aspiration Set	Gcmedica Enterprise Ltd.(Wuxi)	2025-10-16	2025-06-20	HHK	Obstetrics/Gynecology	2	Traditional/Hardware
K253114	TargetCool_x0099_ (RM-DT02W)	Recensmedical, Inc.	2025-10-16	2025-09-24	GEH	General, Plastic Surgery	2	Traditional/Hardware
K253000	CryoFreeze Wart and Skin Tag Remover	Cryosurgery, Inc.	2025-10-16	2025-09-18	GEH	General, Plastic Surgery	2	Traditional/Hardware
K251994	Arthrex Synergy Vision Imaging System	Arthrex, Inc.	2025-10-16	2025-06-27	GCJ	Gastroenterology, Urology	2	Traditional/Hardware
K252024	NeurAxis IB-Stim (01-1020)	Neuraxis	2025-10-16	2025-06-30	QHH	Gastroenterology, Urology	2	Traditional/Hardware
K252612	INDIGO® Aspiration System _x0096_ Lightning Flash Aspiration Tubing; INDIGO® Aspiration System _x0096_ Lightning Bolt Aspiration Tubing	Penumbra, Inc.	2025-10-16	2025-08-19	QEW	Cardiovascular	2	Traditional/Hardware
K252223	Alpha Endo Handpiece (Alpha Endo)	SHENZHEN SUPERLINE TECHNOLOGY CO., LTD.	2025-10-16	2025-07-16	EKX	Dental	1	Traditional/Hardware
K243727	Re:Balans	Mode Sensors AS	2025-10-16	2024-12-03	DSB	Cardiovascular	2	Traditional/Hardware
K252247	Injector Force Max Single Use Injector (NM-400L); Injector Force Max Single Use Injector (NM-400U); Injector Force Max Single Use Injector (NM-400Y); Injector Force Max Single Use Injector (NM-401L)	Olympus Medical Systems Corporation	2025-10-16	2025-07-18	FBK	Gastroenterology, Urology	2	Traditional/Hardware
K252153	FFX Facet Fixation System	Sc Medica	2025-10-16	2025-07-09	MRW	Unknown	U	Traditional/Hardware
K252093	Light Therapy Mask (1019055)	Merchsource, LLC	2025-10-16	2025-07-03	OHS	General, Plastic Surgery	2	Traditional/Hardware
K252631	Profoject_x0099_ Disposable Needle	Cmt Health Pte., Ltd.	2025-10-16	2025-08-20	FMI	General Hospital	2	Traditional/Hardware
K252020	TunnelVision Endoscopic Soft Tissue Release System and the HBL Blade Assembly	Hand Biomechanics Lab, Inc.	2025-10-15	2025-06-30		Unknown		Traditional/Hardware
K251294	Bonafix Implant Abutments	Zentek Medical, LLC	2025-10-15	2025-04-25	NHA	Dental	2	Traditional/Hardware
K252920	ELEOS_x0099_ Limb Salvage System with NanoCept® Technology	Onkos Surgical, Inc.	2025-10-15	2025-09-12	QZZ	Orthopedic	2	Traditional/Hardware
K252367	InbellaMulti System	Inbella Medical, Inc.	2025-10-15	2025-07-30	GEI	General, Plastic Surgery	2	Traditional/Hardware
K250107	V-soft Line_x0099_ Barbed Surgical Suture (Various)	Feeltech Co., Ltd.	2025-10-15	2025-01-15	NEW	General, Plastic Surgery	2	Traditional/Hardware
K253348	TargetCool-e	Recensmedical, Inc.	2025-10-15	2025-09-30	GEH	General, Plastic Surgery	2	Traditional/Hardware
K250979	Thermogard HQ_x0099_ Temperature Management System, Thermogard XP® Temperature Management System (VitalTemp_x0099_ Universal Pad)	Zoll Circulation, Inc.	2025-10-15	2025-03-31	NZE	Cardiovascular	2	Traditional/Hardware
K252946	BioBrace® Extra-Articular Ligament Augmentation Kit	Conmed Corporation	2025-10-15	2025-09-15	MAI	Orthopedic	2	Traditional/Hardware
K252944	LOCATOR® Angled Abutment	Zest Anchors, LLC	2025-10-15	2025-09-15	NHA	Dental	2	Traditional/Hardware
K250510	Sure-Fine Insulin Syringes	Shina Med Corporation	2025-10-15	2025-02-21	FMF	General Hospital	2	Traditional/Hardware
K250115	Hemastyl(_x0099_) Wound Dressing	Rapid Nexus Nanotech Wound Solutions, Inc.	2025-10-14	2025-01-16	FRO	Unknown	U	Traditional/Hardware
K253099	LIFEPAK 15 AC Power Adapter (41577-000333)	Physio-Control, Inc.	2025-10-14	2025-09-24	MPD	Cardiovascular	2	Traditional/Hardware
K253010	Mini Superhawk Suture Anchor System	Responsive Arthroscopy, LLC	2025-10-14	2025-09-19	MBI	Orthopedic	2	Traditional/Hardware
K250776	Lithoblast Single Use Holmium Laser Fibers	Dawell Medical, LLC	2025-10-14	2025-03-14	GEX	General, Plastic Surgery	2	Traditional/Hardware
K253331	PressON Spinal Fixation System	Nexus Spine	2025-10-14	2025-09-30	NKB	Orthopedic	2	Traditional/Hardware
K253461	Demi Pro	Meta Systems Co., Ltd.	2025-10-14	2025-10-07	EBZ	Dental	2	Traditional/Hardware
K251715	FlowArt® Vial Access Device Vented	Asset Medikal	2025-10-14	2025-06-04	LHI	General Hospital	2	Traditional/Hardware
K251522	Mg OSTEOINJECT_x0099_; Mg OSTEOREVIVE_x0099_; Mg OSTEOCRETE_x0099_	Bone Solutions, Inc.	2025-10-13	2025-05-16	MQV	Orthopedic	2	Traditional/Hardware
K242227	GENEO X ELITE	Pollogen, Ltd.	2025-10-12	2024-07-30	PAY	General, Plastic Surgery	2	Traditional/Hardware
K251595	COVID-19 Detect Rapid Self -Test	InBios International, Inc.	2025-10-12	2025-05-27	QYT	Microbiology	2	Traditional/Hardware
K251034	Radiant Renewal Skincare Lid (HD-59A, HD-59B, HD-70); Radiant Renewal Skincare Wand (HD-44)	Shenzhen Nuon Medical Equipment Co., Ltd.	2025-10-12	2025-04-03	NFO	Neurology	2	Traditional/Hardware
K251708	EvoEndo Single-Use Endoscopy System	EvoEndo, Inc.	2025-10-10	2025-06-03	FDS	Gastroenterology, Urology	2	Traditional/Hardware
K250351	Single Use Electrosurgical Knife (KD-612L, KD-612U); Single Use Electrosurgical Knife (KD-620UR); Single Use Electrosurgical Knife (KD-650L, KD-650U)	Olympus Medical Systems Corporation	2025-10-10	2025-02-07	KNS	Gastroenterology, Urology	2	Traditional/Hardware
K251082	HYDROS Robotic System (HY1000); HYDROS Handpiece (HH1000); HYDROS TRUS Probe (HU1000)	Procept Biorobotics	2025-10-10	2025-04-09	PZP	General, Plastic Surgery	2	Traditional/Hardware
K250085	On Call® Sure GK Blood Glucose & Ketone Monitoring System; On Call® Sure Sync GK Blood Glucose & Ketone Monitoring System	ACON Laboratories, Inc.	2025-10-10	2025-01-13	NBW	Clinical Chemistry	2	Traditional/Hardware
K243815	SoClean 3+	Soclean, Inc.	2025-10-10	2024-12-11	QXQ	General Hospital	2	Traditional/Hardware
K243078	HexaPLUS S OneDrill Implant System	Osseofuse International, Inc.	2025-10-10	2024-09-30	DZE	Dental	2	Traditional/Hardware
K251866	Tegaderm Post-Op Transparent Antimicrobial Dressing	Solventum US, LLC	2025-10-10	2025-06-17	FRO	Unknown	U	Traditional/Hardware
K251835	Yomi Robotic System	Neocis, Inc.	2025-10-10	2025-06-16	PLV	Dental	2	Traditional/Hardware
K251927	Zeta Navigation System (ZNS131-US)	Zeta Surgical, Inc.	2025-10-10	2025-06-23	SGE	Neurology	2	Traditional/Hardware
K252903	Verruca-Freeze H Plus	Cryosurgery, Inc.	2025-10-10	2025-09-11	GEH	General, Plastic Surgery	2	Traditional/Hardware
K252001	Collagen Wound Dressing	Winner Medical Co., Ltd.	2025-10-10	2025-06-27	KGN	Unknown	U	Traditional/Hardware
K252544	TMINI Miniature Robotic System	THINK Surgical, Inc.	2025-10-10	2025-08-12	OLO	Neurology	2	Traditional/Hardware
K252737	DeGen Medical Latitude-C AM Cervical Interbody Fusion System	Degen Medical	2025-10-10	2025-08-28	ODP	Orthopedic	2	Traditional/Hardware
K251366	EEG-1260A Neurofax System (EEG-1260A); JE-940A EEG Amplifier Unit (JE-940A); LS-940A Photic Stimulator (LS-940A)	Nihon Kohden Corporation	2025-10-09	2025-05-01	OLT	Neurology	2	Traditional/Hardware
K250645	SleeveLUX 24 Anoscope/Proctoscope (P2001); SleeveLUX 16 Anoscope/Proctoscope (P2002)	Haemoband Surgical, Ltd.	2025-10-09	2025-03-04	FER	Gastroenterology, Urology	2	Traditional/Hardware
K252600	Pediatric Plating Platform I Small-Mini	Orthopediatrics Corp.	2025-10-09	2025-08-18	HRS	Orthopedic	2	Traditional/Hardware
K252272	ORA Method LED Gua Sha (GS-04)	Shenzhen Kaiyan Medical Equipment Co., Ltd.	2025-10-09	2025-07-22	OHS	General, Plastic Surgery	2	Traditional/Hardware
K251876	cleadew GP hydra one	Ophtecs Corporation	2025-10-09	2025-06-18	MRC	Ophthalmic	2	Traditional/Hardware
K252870	Invisalign Specifix Attachment System	Align Technology, Inc.	2025-10-09	2025-09-09	NXC	Dental	2	Traditional/Hardware
K252939	COHITECH ORGANIC COTTON COMPACT APPLICATOR TAMPONS	Cotton High Tech S.L.	2025-10-09	2025-09-15	HEB	Obstetrics/Gynecology	2	Traditional/Hardware
K253094	iFuse Bedrock Granite Implant System	SI-BONE, Inc.	2025-10-09	2025-09-23	OUR	Orthopedic	2	Traditional/Hardware
K251851	DIASAFEplusUS (F00013010)	Fresenius Medical Care Renal Therapies Group, LLC	2025-10-09	2025-06-16	FIP	Gastroenterology, Urology	2	Traditional/Hardware
K252867	VINScreen Urine Drug Test Cup; VINScreen Urine Drug Home Test Cup	Advin Biotech, Inc.	2025-10-09	2025-09-09	NFT	Clinical Toxicology	2	Traditional/Hardware
K251795	Wrist automatic blood pressure monitor (LD-735, LD-752, LD-753)	Honsun (Nantong) Co., Ltd.	2025-10-09	2025-06-12	DXN	Cardiovascular	2	Traditional/Hardware
K252553	Facial & Body Beauty Device (INIA-BD001, INIA-BD002, INIA-BD003, INIA-BD004, F2C15, F3222 Pro, F5516, F3606, F2210 Pro, F5808, INIA-ED001, INIA-ED002, INIA-BLD001, E1507)	Shenzhen Jianchao Intelligent Technology Co., Ltd.	2025-10-09	2025-08-13	NFO	Neurology	2	Traditional/Hardware
K252766	14Fr Low Profile Introducer Kit	Abiomed, Inc.	2025-10-08	2025-08-29	DYB	Cardiovascular	2	Traditional/Hardware
K250298	Kiwi® Complete Vacuum Delivery System, OmniCup® (VAC-DUAL M); Kiwi® Complete Vacuum Delivery System, OmniCup® with Traction Force Indicator (VAC-DUAL MT); Kiwi® Complete Vacuum Delivery System, OmniC Cup® for Cesarean Section (VAC-DUAL C); Kiwi® Complete Vacuum Delivery System, ProCup® (VAC-DUAL S)	Clinical Innovations, LLC	2025-10-08	2025-01-31	HDB	Obstetrics/Gynecology	2	Traditional/Hardware
K251162	CUSA® Clarity Ultrasonic Surgical Aspirator System	Integra Lifesciences Corporation	2025-10-08	2025-04-15	LFL	Unknown	U	Traditional/Hardware
K250060	GT300; GT300-C	Genoray Co., Ltd.	2025-10-08	2025-01-10	OAS	Radiology	2	Traditional/Hardware
K250536	MetaFore Small Screw System	Extremity Medical, LLC	2025-10-08	2025-02-24	HWC	Orthopedic	2	Traditional/Hardware
K251699	The Botticelli (Model: Athena)	Bellamia Technologies, Inc.	2025-10-08	2025-06-02	GEX	General, Plastic Surgery	2	Traditional/Hardware
K252874	Compass Steerable Needle with Adapters SRA-1-01 and SRA-2-01	Serpex Medical, Inc.	2025-10-08	2025-09-10	KTI	Ear, Nose, Throat	2	Traditional/Hardware
K251422	BD Saf-T-Intima_x0099_ Subcutaneous Catheter System	Becton Dickinson Infusion Therapy Systems, Inc.	2025-10-08	2025-05-07	FOZ	General Hospital	2	Traditional/Hardware
K252163	Elecsys Phospho-Tau (181P) Plasma	Roche Diagnostics	2025-10-08	2025-07-10	SET	Immunology	2	Traditional/Hardware
K250894	Eminent Spine Posterior SI System	Eminent Spine	2025-10-07	2025-03-25	OUR	Orthopedic	2	Traditional/Hardware
K244041	Ultrasound Therapy Workstation (XMS-UET2)	Xemis Medical Technology (Shenzhen) Co., Ltd.	2025-10-07	2024-12-30	IMG	Physical Medicine	2	Traditional/Hardware
K250187	Disposable Hot Biopsy Forceps (FD-210U); Disposable Hot Biopsy Forceps (FD-230U)	Olympus Medical Systems Corporation	2025-10-07	2025-01-22	KGE	Gastroenterology, Urology	2	Traditional/Hardware
K250688	Cedar_x0099_ Endovenous Radiofrequency Catheter (ERA-C70-US); Cedar_x0099_ Endovenous Radiofrequency Catheter (ERA-C30-US); Endovenous Radiofrequency Generator (ERA-G5-US)	Acotec Scientific Co., Ltd.	2025-10-07	2025-03-06	GEI	General, Plastic Surgery	2	Traditional/Hardware
K252150	Ultrasonic Bipolar Generator (USG-410); Reuseable Cordless Transducer (TD-410); THUNDERBEAT II Shears with Ultrasonic Mode, 5mm, 45cm (TB2-0545FC); THUNDERBEAT II Shears with Ultrasonic Mode, 5mm, 35cm (TB2-0535FC); THUNDERBEAT II Shears with Ultrasonic Mode, 5mm, 25cm (TB2-0525FC); THUNDERBEAT II Shears with Ultrasonic Mode, 5mm, 20cm (TB2-0520FC)	Olympus Medical Systems Corporation	2025-10-07	2025-07-09	GEI	General, Plastic Surgery	2	Traditional/Hardware
K250364	Saview SH Optic 38 UV (Senofilcon A) Visibility Tinted Soft (Hydrophilic) Contact Lens; Saview SH Optic 38 UV toric (Senofilcon A) Visibility Tinted Soft (Hydrophilic) Contact Lens; Saview SH Optic 38 UV multifocal (Senofilcon A) Visibility Tinted Soft (Hydrophilic) Contact Lens	St. shine Optical Co., Ltd.	2025-10-07	2025-02-10	LPL	Ophthalmic	2	Traditional/Hardware
K252572	Prodeon Urethral Sheath System	Prodeon Medical, Inc.	2025-10-07	2025-08-14	FED	Gastroenterology, Urology	2	Traditional/Hardware
K252502	Folding Mobility Scooter (KD101)	Nanjing Kangni Smart Technology Co., Ltd.	2025-10-06	2025-08-08	INI	Physical Medicine	2	Traditional/Hardware
K252140	Heylo_x0099_ System	Coloplast Corp.	2025-10-06	2025-07-08	EXB	Gastroenterology, Urology	1	Traditional/Hardware
K250173	Shiley_x0099_ Oral RAE Tracheal Tube Cuffless, Murphy Eye (113-XX) Shiley_x0099_ Nasal RAE Tracheal Tube Cuffless, Murphy Eye (114-XX) Shiley_x0099_ Oral RAE Tracheal Tube Cuffed, Murphy Eye (115-XX) Shiley_x0099_ Oral RAE Tracheal Tube with TaperGuard_x0099_ Cuff, Murphy Eye (115-XXOR) Shiley_x0099_ Nasal RAE Tracheal Tube with TaperGuard_x0099_ Cuff, Murphy Eye (119-XXNR)	Covidien, LLC	2025-10-06	2025-01-21	BTR	Anesthesiology	2	Traditional/Hardware
K251603	Tigertriever 17 Ultra Revascularization Device	Rapid Medical , Ltd.	2025-10-06	2025-05-27	NRY	Cardiovascular	2	Traditional/Hardware
K252806	Flexible Suction Ureterorenoscope (US27G-12-EU, US27G-12-US, US33G-17-EU, US33G-17-US, US38G-20-EU, US38G-20-US.)	Shanghai AnQing Medical Instrument Co., Ltd.	2025-10-03	2025-09-03	FGB	Gastroenterology, Urology	2	Traditional/Hardware
K251426	da Vinci SP Surgical System (SP1098)	Intuitive Surgical, Inc.	2025-10-03	2025-05-08	NAY	Gastroenterology, Urology	2	Traditional/Hardware
K252178	MAGENTIQ-COLO (ME-APDS)	Magentiq Eye, Ltd.	2025-10-03	2025-07-11	QNP	Gastroenterology, Urology	2	Traditional/Hardware
K251646	extriCARE® 1000 Negative Pressure Wound Therapy System	Alleva Medical Devices	2025-10-03	2025-05-29	OMP	General, Plastic Surgery	2	Traditional/Hardware
K251464	TRI-BEAM PRO, TRI-BEAM (Nd:YAG Laser unit)	Jeisys Medical Incorporated	2025-10-03	2025-05-13	GEX	General, Plastic Surgery	2	Traditional/Hardware
K251468	Sleeved IC 3 Family Sleeved IC 3 SWT (name not finalized) Sleeved IC 3 Pocket (name not finalized) Sleeved IC 3 Plus (name not finalized) Sleeved IC 3 Plus Pocket (name not finalized) (N/A)	Hollister Incorporated	2025-10-03	2025-05-13	EZD	Gastroenterology, Urology	2	Traditional/Hardware
K242946	HESTIA (L200-A)	Senbitec Co., Ltd.	2025-10-03	2024-09-25	GEX	General, Plastic Surgery	2	Traditional/Hardware
K250028	Anti Snore Mouthpiece	Dongguan Yiyao Science & Technology Development Co., Ltd.	2025-10-03	2025-01-06	LRK	Dental	2	Traditional/Hardware
DEN220077	ProSense_x0099_ System	Icecure Medical	2025-10-03	2022-10-19	QXW	General, Plastic Surgery	2	Traditional/Hardware
K243968	Revolve Surgical System	Revolve Surgical, Inc.	2025-10-03	2024-12-23	GCJ	Gastroenterology, Urology	2	Traditional/Hardware
K251859	EVIS EUS Ultrasound Gastrointestinal Videoscope (Olympus GF-UE190)	Olympus Medical Systems Corporation	2025-10-03	2025-06-17	ODG	Gastroenterology, Urology	2	Traditional/Hardware
K251639	xvision Spine system	Augmedics, Ltd.	2025-10-03	2025-05-29	SBF	Neurology	2	Traditional/Hardware
K252820	PGLA90 Poly(glycolide-co-L-lactide) Surgical Sutures (Calypso); PGLA90 Poly(glycolide-co-L-lactide) Surgical Sutures (Odysseus)	Internacional Farmacéutica S.A DE C.V	2025-10-03	2025-09-04	GAM	General, Plastic Surgery	2	Traditional/Hardware
K250031	Amplatzer Guidewire	Abbott Medical	2025-10-03	2025-01-07	DQX	Cardiovascular	2	Traditional/Hardware
K251442	TIANYI Extracorporeal Blood Tubing Set (TY-NDEO-A1)	Ningbo Tianyi Medical Appliance Co., Ltd.	2025-10-02	2025-05-09	FJK	Gastroenterology, Urology	2	Traditional/Hardware
K252758	Cannulated Screw and Kirschner (K wire) System	Orthonovis, Inc.	2025-10-02	2025-08-29	HWC	Orthopedic	2	Traditional/Hardware
K252059	CryoValve SG Pulmonary Valve (SGPV10) CryoValve SG Pulmonary Valve and Conduit (SGPV00)	Artivion, Inc.	2025-10-02	2025-07-01	OHA	Unknown	U	Traditional/Hardware
K250551	4K Endoscopic Camera System (SV-800, SV-800I, SV-800R, SV-800N)	Shenzhen Sophway Technology Co., Ltd.	2025-10-02	2025-02-25	GCJ	Gastroenterology, Urology	2	Traditional/Hardware
K250860	BreatheBand® (Model 1000)	Exemplar Medical, LLC	2025-10-02	2025-03-21	BYI	Anesthesiology	2	Traditional/Hardware
K252769	Upper Arm Electronic Blood Pressure Monitor (FC-BP107, FC-BP123, FC-BP125, FC-BP126, FC-BP127, FC-BP116)	Shenzhen Finicare Co., Ltd.	2025-10-02	2025-09-02	DXN	Cardiovascular	2	Traditional/Hardware
K251124	G-Bond Universal	GC America, Inc.	2025-10-02	2025-04-11	KLE	Dental	2	Traditional/Hardware
K252440	EasyTeleMed (2.0.2)	Ingeniars S.R.L.	2025-10-02	2025-08-04	DRG	Cardiovascular	2	Traditional/Hardware
K243152	GelPOINT V-Path Transvaginal Access Platform with Retroperitoneal Access Device	Applied Medical Resources Corp.	2025-10-02	2024-09-30	HEW	Obstetrics/Gynecology	2	Traditional/Hardware
K250767	Newclip Patient-matched instrumentation non sterile PSI	Newclip Technics	2025-10-01	2025-03-13	PBF	Orthopedic	2	Traditional/Hardware
K250083	PRO-DOSE System	Nu-Rise, SA	2025-10-01	2025-01-13	NZT	Radiology	2	Traditional/Hardware
K251899	E Blator	New Deantronics Taiwan , Ltd.	2025-10-01	2025-06-20	GEI	General, Plastic Surgery	2	Traditional/Hardware
K252096	Light Therapy Decollete Mask (1019135)	Merchsource, LLC	2025-10-01	2025-07-03	OHS	General, Plastic Surgery	2	Traditional/Hardware
K251767	Vena MicroAngioscope_x0099_ System	Vena Medical Holdings Corp	2025-10-01	2025-06-10	LYK	Gastroenterology, Urology	2	Traditional/Hardware
K251501	Visby Medical Men's Sexual Health Test	Visby Medical, Inc.	2025-10-01	2025-05-15	QEP	Microbiology	2	Traditional/Hardware
K252447	Picosecond laser device (BMPS4)	Hebei Newangie Technology Co., Ltd.	2025-10-01	2025-08-04	GEX	General, Plastic Surgery	2	Traditional/Hardware
K251825	Jmoon FlexGlow Light Therapy Device (JD20U SP, JD20U SG)	Shenzhen Ulike Smart Electronics Co., Ltd.	2025-10-01	2025-06-13	OHS	General, Plastic Surgery	2	Traditional/Hardware
K252072	Francisella tularensis Real-time PCR assay	Centers For Disease Control and Prevention	2025-09-30	2025-07-01	SGA	Immunology	2	Traditional/Hardware
K251799	Mobility Scooter (BBR-Q40-01); Mobility Scooter (BBR-Q40-02); Mobility Scooter (BBR-Q40-03); Mobility Scooter (BBR-Q40-04); Mobility Scooter (BBR-Q40-05); Mobility Scooter (BBR-Q40-06)	Jiangsu Bangbang Intelligent Technology Co., Ltd.	2025-09-30	2025-06-12	INI	Physical Medicine	2	Traditional/Hardware
K251197	Dexter L6 System	Distalmotion SA	2025-09-30	2025-04-17	SDD	General, Plastic Surgery	2	Traditional/Hardware
K251690	Arthrex SpeedFLEX_x0099_ Implant	Arthrex, Inc.	2025-09-30	2025-06-02	OWY	General, Plastic Surgery	2	Traditional/Hardware
K243270	TigerConnect Alarm Management	Tigerconnect	2025-09-30	2024-10-16	MSX	Cardiovascular	2	Traditional/Hardware
K252722	Biopsy Forceps	Fehling Instruments GmbH	2025-09-30	2025-08-28	DWZ	Cardiovascular	2	Traditional/Hardware
K251669	IBP transducer adapter cable, Argon/BD/Ohmeda, 2m; IBP transducer adapter cable, Draeger 10-pin, 2m; IBP transducer adapter cable, Draeger 7-pin, 2m; IBP transd. adapter cbl, Abbott/Medex, Smiths/TranStar 2m; IBP transducer adapter cable, Baxter/Edwards, 0.3m; IBP transducer adapter cable, Baxter/Edwards, 2m; IBP transducer adapter cable, Argon/BD/Ohmeda, 0.3m; IBP transducer adapter cable, Draeg…	Shanghai Draeger Medical Instrument Co., Ltd.	2025-09-30	2025-05-30	DSA	Cardiovascular	2	Traditional/Hardware
K252085	Allomatrix (Allomatrix Injectable Putty; Allomatrix C; Allomatrix DR; Allomatrix Custom)	Wright Medical Technology, Inc. (Stryker Corporation)	2025-09-30	2025-07-02	MQV	Orthopedic	2	Traditional/Hardware
K250050	miDiagnostics HSV-1&2 CSF Test	Midiagnostics NV	2025-09-30	2025-01-10	PGH	Microbiology	2	Traditional/Hardware
K243833	Portable oxygen concentrator (JAY-1000P)	Longfian Scitech Co., Ltd.	2025-09-29	2024-12-13	CAW	Anesthesiology	2	Traditional/Hardware
K251334	NEW DOUBLO 2.0	Hironic Co., Ltd.	2025-09-29	2025-04-30	GEI	General, Plastic Surgery	2	Traditional/Hardware
K252594	UltraGuideCTR® image guided soft tissue release system	Sonex Health	2025-09-29	2025-08-15	HRX	Orthopedic	2	Traditional/Hardware
K250123	Master-Pin X (MP Pin with thread) (36BMP000030 / MP30)	Hager& Meisinger GmbH	2025-09-29	2025-01-17	DZL	Dental	2	Traditional/Hardware
K252770	iLet ACE Pump	Beta Bionics, Inc.	2025-09-29	2025-09-02	QFG	Clinical Chemistry	2	Traditional/Hardware
K251104	SureTome_x0099_ SW Sphincterotome with DomeTip	Wilson-Cook Medical	2025-09-29	2025-04-11	KNS	Gastroenterology, Urology	2	Traditional/Hardware
K252054	SpineAR SNAP (SyncAR Spine)	Surgical Theater, Inc.	2025-09-29	2025-07-01	SBF	Neurology	2	Traditional/Hardware
K253236	G-BLOCK	Graphenano Dental S.L.	2025-09-29	2025-09-29	EBF	Dental	2	Traditional/Hardware
K252051	allay Nerve Cap (TL5515-1); allay Nerve Cap (TL5515-2); Delivery Tips (TL-7627)	Tulavi Therapeutics, Inc.	2025-09-29	2025-07-01	SBG	Neurology	2	Traditional/Hardware
K252441	Primero Safe Access System	South53, LLC	2025-09-29	2025-08-04	DYB	Cardiovascular	2	Traditional/Hardware
K243983	Paltop Dental Implant System	Paltop Advanced Dental Solutions, Ltd.	2025-09-29	2024-12-23	DZE	Dental	2	Traditional/Hardware
K252221	Inset Reverse Total Shoulder System	Shoulder Innovations, Inc.	2025-09-26	2025-07-16		Unknown		Traditional/Hardware
K251275	VitalStream ART Connect; VitalStream-Hemo	Caretaker Medical	2025-09-26	2025-04-24	DXG	Cardiovascular	2	Traditional/Hardware
K252700	Optima Coil System (Optima Packing Coil System)	Balt USA, LLC	2025-09-26	2025-08-27	HCG	Neurology	2	Traditional/Hardware
K252921	Radial Jaw 4 Pulmonary Biopsy Forceps	Boston Scientific Corporation	2025-09-26	2025-09-12	BWH	Ear, Nose, Throat	2	Traditional/Hardware
K251208	Tuned Self-Fitting Mobile App	Tuned , Ltd.	2025-09-26	2025-04-18	SCR	Ear, Nose, Throat	2	Traditional/Hardware
K250659	LoFric Origo	Wellspect AB	2025-09-26	2025-03-05	EZD	Gastroenterology, Urology	2	Traditional/Hardware
K252435	Magnetic Surgical System	Levita Magnetics International Corp	2025-09-26	2025-08-01	PNL	General, Plastic Surgery	2	Traditional/Hardware
K251919	Thulium Laser System (Deluxlase)	Nanjing Bestview Laser S&T Co., Ltd.	2025-09-26	2025-06-23	GEX	General, Plastic Surgery	2	Traditional/Hardware
K251262	S.I.N. Dental Implant System	S.I.N. Implant System Ltda	2025-09-26	2025-04-23	DZE	Dental	2	Traditional/Hardware
K251986	AUXILIARY WATER TUBE MAJ-855	Olympus Medical Systems Corporation	2025-09-26	2025-06-27	OCX	Gastroenterology, Urology	2	Traditional/Hardware
K250318	Planmed XFI	Planmed OY	2025-09-26	2025-02-04	SFV	Radiology	2	Traditional/Hardware
K250093	Linshom Continuous Predictive Respiratory Monitoring System (CPRMS)	Linshom Medical, Inc.	2025-09-26	2025-01-14	BZQ	Anesthesiology	2	Traditional/Hardware
K251204	FUJIFILM Stiffening Wire Device (SW-2000)	Fujifilm Healthcare Americas Corporation	2025-09-26	2025-04-18	FDA	Gastroenterology, Urology	2	Traditional/Hardware
K252063	Medical Diode Laser Systems (BERYLAS-12N); Medical Diode Laser Systems (BERYLAS-15N); Medical Diode Laser Systems (HARLAS-45JN); Medical Diode Laser Systems (HARLAS-46JN)	Wuhan Dimed Laser Technology Co., Ltd.	2025-09-25	2025-07-01	GEX	General, Plastic Surgery	2	Traditional/Hardware
K250076	Endeavor_x0099_ Stand-Alone Cervical IBF System	Innovasis	2025-09-25	2025-01-10	OVE	Orthopedic	2	Traditional/Hardware
K251512	Hi bebe super (BT-150B)	Bistos Co., Ltd.	2025-09-25	2025-05-16	HGX	Obstetrics/Gynecology	2	Traditional/Hardware
DEN250016	Essilor® Stellest®	Essilor of America, Inc.	2025-09-25	2025-04-28	QUR	Ophthalmic	2	Traditional/Hardware
K251997	Single-Use Biopsy Valve (MAJ-1555)	Olympus Medical Systems Corporation	2025-09-25	2025-06-27	OCX	Gastroenterology, Urology	2	Traditional/Hardware
K252102	Alinity m HCV	Abbott Molecular, Inc.	2025-09-25	2025-07-03	MZP	Microbiology	2	Traditional/Hardware
K252725	Stem Extension Line (U2 Total Knee System_x0097_PSA Type)	United Orthopedic Corporation	2025-09-25	2025-08-28	JWH	Orthopedic	2	Traditional/Hardware
K251789	EMBOTRAP III Revascularization Device	Neuravi Limited	2025-09-25	2025-06-11	NRY	Cardiovascular	2	Traditional/Hardware
K250837	Pulse Oximeter	Shanghai Berry Electronic Tech Co., Ltd.	2025-09-25	2025-03-20	DQA	Cardiovascular	2	Traditional/Hardware
K251148	JDEvolution Plus L and JDEvolution Plus LE	Jdentalcare Srl	2025-09-25	2025-04-14	DZE	Dental	2	Traditional/Hardware
K243785	Shiley_x0099_ Oral/Nasal Tracheal Tube with TaperGuard_x0099_ Cuff Reinforced, Murphy Eye Shiley_x0099_ Tracheal Tube TaperGuard_x0099_ Cuff Reinforced with Stylet Shiley_x0099_ Lo-Contour Oral/Nasal Tracheal Tube Cuffed Reinforced Shiley_x0099_ Lo-Contour Oral/Nasal Tracheal Tube Cuffed Reinforced, Murphy Eye Shiley_x0099_ Oral/Nasal Tracheal Tube Cuffless Reinforced	Covidien, LLC	2025-09-25	2024-12-09	BTR	Anesthesiology	2	Traditional/Hardware
K251812	Steripath® Flow_x0099_ Blood Collection System	Magnolia Medical Technologies	2025-09-25	2025-06-12	JKA	Clinical Chemistry	2	Traditional/Hardware
K251993	Panther Fusion GI Expanded Bacterial Assay	Hologic, Inc.	2025-09-25	2025-06-27	PCH	Microbiology	2	Traditional/Hardware
K251971	RPS Primary TKA Software; RPS Console; RPS Saw One; RPS Cable; RPS Saw Oscillating Tip Cartridge; RPS Console Cart Attachment; Ball Tip Pointer	Stryker Instruments	2025-09-25	2025-06-26	OLO	Neurology	2	Traditional/Hardware
K251868	Panther Fusion GI Bacterial Assay	Hologic	2025-09-25	2025-06-18	PCH	Microbiology	2	Traditional/Hardware
K251791	Auxano® Wedge Fixation System	Auxano Medical, LLC	2025-09-25	2025-06-11	PLF	Orthopedic	2	Traditional/Hardware
K252013	EnSite_x0099_ X EP System	Abbott Medical	2025-09-25	2025-06-27	DQK	Cardiovascular	2	Traditional/Hardware
K252183	Resitu Slider 09 (RESL09)	Resitu Medical AB	2025-09-24	2025-07-11	KNW	Gastroenterology, Urology	2	Traditional/Hardware
K252689	MEDRAD Centargo CT Injection System; MEDRAD Centargo Day Set; MEDRAD Centargo Patient Line; MEDRAD Centargo Replacement Spike; MEDRAD ISI2 Module (ISI2)	Imaxeon Pty, Ltd.	2025-09-24	2025-08-26	IZQ	Cardiovascular	2	Traditional/Hardware
K252703	LithoVue Elite Single-Use Digital Flexible Ureteroscope - Standard with pressure monitoring (M0067940000); LithoVue Elite Single-Use Digital Flexible Ureteroscope - Reverse with pressure monitoring (M0067940500)	Boston Scientific Corporation	2025-09-24	2025-08-27	FGB	Gastroenterology, Urology	2	Traditional/Hardware
K251206	Digital X-Ray DentiMax Pro Imaging System	Dentimax, Inc.	2025-09-24	2025-04-18	MUH	Dental	2	Traditional/Hardware
K252682	LenSx Laser System (8065000944)	Alcon Laboratories, Inc.	2025-09-24	2025-08-25	OOE	Ophthalmic	2	Traditional/Hardware
K244029	ROBOPERA (ER-R-002); ROBOPERA (ER-R-003)	Endorobotics Co., Ltd.	2025-09-24	2024-12-30	FDF	Gastroenterology, Urology	2	Traditional/Hardware
K250071	Alma FemiLift Pixel CO2 Laser System, Delivery Devices and Accessories	Alma Lasers, Inc.	2025-09-24	2025-01-10	GEX	General, Plastic Surgery	2	Traditional/Hardware
K250792	t:slim X2 insulin pump with interoperable technology	Tandem Diabetes Care, Inc.	2025-09-24	2025-03-14	QFG	Clinical Chemistry	2	Traditional/Hardware
K252680	Celerity_x0099_ 20 HP Biological Indicator	STERIS Corporation	2025-09-24	2025-08-25	FRC	General Hospital	2	Traditional/Hardware
K252227	Pounce(TM) Sheath	Surmodics,Inc.	2025-09-24	2025-07-16	DYB	Cardiovascular	2	Traditional/Hardware
K251734	ProVee Video Processing Unit (PV-003)	Proverum Limited	2025-09-24	2025-06-06	FET	Gastroenterology, Urology	2	Traditional/Hardware
K243910	Retraxil	Kulzer, LLC	2025-09-24	2024-12-19	MVL	Unknown	U	Traditional/Hardware
K251140	Zenflow Spring Scope	Zenflow, Inc.	2025-09-23	2025-04-14	FAJ	Gastroenterology, Urology	2	Traditional/Hardware
K251894	Himaging Bronchscope System	Himaging Technology (Shanghai) Co., Ltd.	2025-09-23	2025-06-20	EOQ	Ear, Nose, Throat	2	Traditional/Hardware
K251982	Edwards MC3 Tricuspid annuloplasty ring (4900)	Edwards Lifesciences, LLC	2025-09-23	2025-06-27	KRH	Cardiovascular	2	Traditional/Hardware
K250209	Polyvinyl Alcohol Embolic Microspheres	Canyon Medical, Inc.	2025-09-23	2025-01-24	KRD	Cardiovascular	2	Traditional/Hardware
K251973	Luminance Red Cold Sore Device (TN1927G)	Luminance Medical Ventures, Inc.	2025-09-23	2025-06-26	OKJ	General, Plastic Surgery	2	Traditional/Hardware
K252644	PINION_x0099_ PDO Knotless Suture - Absorbable Poly (P-Dioxanone) Knotless Suture; PINION_x0099_ PGA-PCL Knotless Suture - Absorbable Poly (Glycolide-Co-Caprolactone) Knotless Suture	M/s. Meril Endo Surgery Private Limited.	2025-09-23	2025-08-21	NEW	General, Plastic Surgery	2	Traditional/Hardware
K252043	Bipolar applicator CelonProBreath (WB990310); Bipolar applicator CelonProSleep plus (WB990311); Bipolar applicator CelonProBreath (WB990210); Bipolar applicator CelonProSleep plus (WB990211)	Olympus Winter &Ibe GmbH	2025-09-23	2025-06-30	GEI	General, Plastic Surgery	2	Traditional/Hardware
K253053	Dura-Crown (CB21-A1/CB21-A2/CB21-A3/CB21-B1)	Hangzhou SHINING3D Dental Technology Co., Ltd.	2025-09-23	2025-09-22	EBF	Dental	2	Traditional/Hardware
DEN240080	Biolinq Shine Autonomous Time-in-Range Microsensor	Biolinq Incorporated	2025-09-23	2024-12-27	SFU	Clinical Chemistry	2	Traditional/Hardware
K252045	Ion Endoluminal System (IF1000)	Intuitive Surgical, Inc.	2025-09-23	2025-06-30	EOQ	Ear, Nose, Throat	2	Traditional/Hardware
K250205	Babio® Virus Transport Kit (Non-inactivating)	Jinan Babio Biotechnology Co., Ltd.	2025-09-22	2025-01-24	JSM	Microbiology	1	Traditional/Hardware
K252315	Santreva_x0099_-ATK Endovascular Revasculariztion Catheter	AngioSafe, Inc.	2025-09-22	2025-07-25	PDU	Cardiovascular	2	Traditional/Hardware
K251743	SPI LaproSac_x0099_ Laparoscopic Single-Use Rip-Stop Nylon Specimen Retrieval System	Surgical Principals, Inc.	2025-09-22	2025-06-06	GCJ	Gastroenterology, Urology	2	Traditional/Hardware
K243645	IC-Flow_x0099_ Imaging System 2.0	Diagnostic Green GmbH	2025-09-22	2024-11-26	IZI	Radiology	2	Traditional/Hardware
K250388	ENDOFLATOR +	Karl Storz SE & CO. KG	2025-09-22	2025-02-11	HIF	Obstetrics/Gynecology	2	Traditional/Hardware
K252285	Well-Root PT	Vericom Co., Ltd.	2025-09-19	2025-07-23	KIF	Dental	2	Traditional/Hardware
K251689	VARIOS 170 LUX SCALER SYSTEM (VA170LUXS10); VARIOS 170 LUX SCALER SYSTEM (VA170LUXS11); VARIOS 170 SCALER SYSTEM (VA170S11)	Nakanishi, Inc.	2025-09-19	2025-06-02	ELC	Dental	2	Traditional/Hardware
K243920	Purema H Hemoconcentrator - Pediatric	Medica USA, Inc.	2025-09-19	2024-12-20	KDI	Gastroenterology, Urology	2	Traditional/Hardware
K242859	VEGA	Ibramed Equipamentos Médicos	2025-09-19	2024-09-20	GEX	General, Plastic Surgery	2	Traditional/Hardware
K250953	EQUIA LC ONE	GC America, Inc.	2025-09-19	2025-03-28	EMA	Dental	2	Traditional/Hardware
K250128	Single Use Suction-Evacuation Ureteral Access Sheath	Anhui Happiness Workshop Medical Instruments Co., Ltd.	2025-09-19	2025-01-17	FED	Gastroenterology, Urology	2	Traditional/Hardware
K244035	Portable mesh nebulizer (JM821)	Shenzhen Jermei Medical Device Technology Co., Ltd.	2025-09-19	2024-12-30	CAF	Anesthesiology	2	Traditional/Hardware
K243990	BondEase 2 Topical Skin Adhesive	Optmed, Inc.	2025-09-19	2024-12-26	MPN	General, Plastic Surgery	2	Traditional/Hardware
K250408	Alegria Flash ENA Screen	Zeus Scientific	2025-09-19	2025-02-13	LLL	Immunology	2	Traditional/Hardware
K241868	xR IVD	Tempus AI, Inc.	2025-09-19	2024-06-27	PZM	Pathology	2	Traditional/Hardware
K251867	EVIS EXERA III DUODENOVIDEOSCOPE OLYMPUS TJF-Q190V (TJF-Q190V)	Olympus Medical Systems Corp.	2025-09-19	2025-06-17	FDT	Gastroenterology, Urology	2	Traditional/Hardware
K252662	UniBur	Nakanishi, Inc.	2025-09-19	2025-08-22	HBE	Neurology	2	Traditional/Hardware
K252613	Unscented menstrual three-piece applicator tampon	Unibeauty (Hubei) Technology Co., Ltd.	2025-09-19	2025-08-19	HEB	Obstetrics/Gynecology	2	Traditional/Hardware
K252647	Tapestry Biointegrative Implant	Embody, Inc.	2025-09-19	2025-08-21	OWY	General, Plastic Surgery	2	Traditional/Hardware
K251100	IPGTFL-02	Ipg Medical Corporation	2025-09-19	2025-04-10	GEX	General, Plastic Surgery	2	Traditional/Hardware
DEN240067	KMT2A Breakapart FISH Probe Kit PDx (CDA-LPH013)	Cytocell Limited	2025-09-19	2024-11-22	SFS	Hematology	2	Traditional/Hardware
K250450	Coated hip implants	Medacta International S.A.	2025-09-19	2025-02-18	LZO	Orthopedic	2	Traditional/Hardware
K250649	Bunkerhill ECG-EF	BunkerHill Health	2025-09-19	2025-03-04	QYE	Cardiovascular	2	Traditional/Hardware
K251597	InnerView System	Perimetrics, Inc.	2025-09-18	2025-05-27	EKX	Dental	1	Traditional/Hardware
K251377	Magic InBra	Medela AG	2025-09-18	2025-05-02	HGX	Obstetrics/Gynecology	2	Traditional/Hardware
K251649	Sunny Plus (Sunny)	ShenB Co., Ltd.	2025-09-18	2025-05-29	NFO	Neurology	2	Traditional/Hardware
K250883	ULTRASONIC PROBE UM-3R (UM-3R); ULTRASONIC PROBE UM-G20-29R (UM-G20-29R)	Olympus Medical Systems Corporation	2025-09-18	2025-03-24	ITX	Radiology	2	Traditional/Hardware
K251479	Mobarn 80:20 Lumbar Interbody Fusion System (Posterior Lumbar Interbody Fusion Cage (PLIF)); Mobarn 80:20 Lumbar Interbody Fusion System (Transforaminal Lumbar Interbody Fusion Cage (TLIF)); Mobarn 80:20 Lumbar Interbody Fusion System (Direct Lateral Lumbar Interbody Fusion Cage (DLIF)); Mobarn 80:20 Lumbar Interbody Fusion System (Anterior Lumbar Interbody Fusion Cage (ALIF))	Mobarn Medical Devices, LLC	2025-09-18	2025-05-13	MAX	Orthopedic	2	Traditional/Hardware
K251905	Normatec Elite Hip	NormaTec Industries, LP	2025-09-18	2025-06-20	IRP	Physical Medicine	2	Traditional/Hardware
K252035	DENTURE SOFT EX (Pink set); DENTURE SOFT EX (White set); DENTURE SOFT EX (Pink powder); DENTURE SPFT EX (White powder); DENTURE SOFT EX (Liquid); DENTURE SOFT EX (Trial kit Pink); DENTURE SOFT EX (Trial kit White)	Kamemizu Chemical Industry Co., Ltd.	2025-09-17	2025-06-30	EBI	Dental	2	Traditional/Hardware
K251446	PlasmaFlow X Compression Sleeve Device (XPF0001)	Manamed, LLC	2025-09-17	2025-05-09	JOW	Cardiovascular	2	Traditional/Hardware
K252615	Ruthless Spine RJB	Ruthless, LLC Dba Ruthless Spine	2025-09-17	2025-08-19	QWL	Orthopedic	2	Traditional/Hardware
K251902	Vitaform Procedural Mask - Blue (Vitaform Blue); Vitaform Procedural Mask with Shield (Vitaform-FS)	Vitacore Industries, Inc.	2025-09-17	2025-06-20	FXX	General, Plastic Surgery	2	Traditional/Hardware
K251221	Assert-IQ (DM5000); Assert-IQ (DM5300); Assert-IQ (DM5500); Merlin.net (MN7000)	Abbott	2025-09-17	2025-04-21	MXD	Cardiovascular	2	Traditional/Hardware
K244006	FG Bone Graft M	Full Golden Biotech Co., Ltd.	2025-09-17	2024-12-26	LYC	Dental	2	Traditional/Hardware
K243752	Double Tube Herbst Appliance	The Tmj Clinic PC	2025-09-17	2024-12-05	LRK	Dental	2	Traditional/Hardware
K251688	Carpentier-Edwards Physio Annuloplasty Ring (4450)	Edwards Lifesciences, LLC	2025-09-17	2025-06-02	KRH	Cardiovascular	2	Traditional/Hardware
K252540	ACCUJECT Injector Set 2.1-1P (LP604590)	Medicel AG	2025-09-16	2025-08-12	MSS	Ophthalmic	1	Traditional/Hardware
K242287	SFIT Abutment	Cowellmedi Co., Ltd.	2025-09-16	2024-08-02	NHA	Dental	2	Traditional/Hardware
K251676	Medline Microtek C-Flo Bag Decanter, Sterile (2000S); Medline Microtek Bag Decanter II, Sterile (2002S); Medline Microtek Vial Decanter, Sterile (2006S); Medline Microtek Transfer Device, Sterile (2008S)	Microtek Medical, LLC	2025-09-16	2025-05-30	LHI	General Hospital	2	Traditional/Hardware
K252598	Flexible Cystoscope (CY50H-20EU, CY50H-20US, CY55H-24EU, CY55H-24US)	Shanghai AnQing Medical Instrument Co., Ltd.	2025-09-15	2025-08-18	FAJ	Gastroenterology, Urology	2	Traditional/Hardware
K251780	iGPS Navigation Instruments	SI-BONE, Inc.	2025-09-15	2025-06-10	OLO	Neurology	2	Traditional/Hardware
K250609	Sober Self-Test	Sober Ip, LLC	2025-09-15	2025-02-28	DIC	Clinical Toxicology	2	Traditional/Hardware
K251869	Disposable Prophy Angle (3399-60, 3399-090, 3399-105)	Premium Plus (Dongguan) Limited	2025-09-15	2025-06-18	EGS	Dental	1	Traditional/Hardware
K252443	SpaceFix Shoulder Spacer	G21, S.R.L.	2025-09-15	2025-08-04	MBB	Orthopedic	2	Traditional/Hardware
K252128	Zener® (model ZEN-001-B1)	Uvx, Inc.	2025-09-15	2025-07-07	FRA	General Hospital	2	Traditional/Hardware
K250689	CloudTMS Edge	Teleemg, LLC	2025-09-14	2025-03-06	OBP	Neurology	2	Traditional/Hardware
K252225	PowerKnot High Strength Sutures	Medacta International S.A.	2025-09-12	2025-07-16	GAT	General, Plastic Surgery	2	Traditional/Hardware
K252189	LED Light Therapy Mask (2311, 2344, 2457, 2458)	Dongguan Yanxi Technology Co., Ltd.	2025-09-12	2025-07-14	OHS	General, Plastic Surgery	2	Traditional/Hardware
K251518	Volta AF-Xplorer II	Volta Medical	2025-09-12	2025-05-16	DQK	Cardiovascular	2	Traditional/Hardware
K252576	Legend X Platform	Pollogen, Ltd.	2025-09-12	2025-08-14	GEI	General, Plastic Surgery	2	Traditional/Hardware
K252562	Spine & Trauma Navigation Instruments	Brainlab AG	2025-09-12	2025-08-14	OLO	Neurology	2	Traditional/Hardware
K251843	Erchonia EVRL	Erchonia Corporation	2025-09-12	2025-06-16	OLP	General, Plastic Surgery	2	Traditional/Hardware
K250986	S250-FIT Proton Beam Radiation Therapy Device (S250-FIT)	Mevion Medical Systems, Inc.	2025-09-12	2025-03-31	LHN	Radiology	2	Traditional/Hardware
K250445	Fast Warm - NX	Fujifilm Irvine Scientific	2025-09-12	2025-02-14	MQL	Obstetrics/Gynecology	2	Traditional/Hardware
K252593	LUX-Dx II Insertable Cardiac Monitor (M302); LUX-Dx II+ Insertable Cardiac Monitor (M312)	Boston Scientific Corporation	2025-09-12	2025-08-15	MXD	Cardiovascular	2	Traditional/Hardware
K252586	CADDIE	Odin Medical Limited	2025-09-12	2025-08-15	QNP	Gastroenterology, Urology	2	Traditional/Hardware
K250059	BD PhaSeal_x0099_ Optima Connecting Set (C83-O); BD PhaSeal_x0099_ Optima Spike Set (C180-O)	Becton, Dickinson and Company	2025-09-12	2025-01-10	ONB	General Hospital	2	Traditional/Hardware
K251083	Compact II	Enraf-Nonius, B.V.	2025-09-12	2025-04-09	IPF	Physical Medicine	2	Traditional/Hardware
K252027	Vertex(TM) Catheter	Jupiter Endovascular	2025-09-12	2025-06-30	DYB	Cardiovascular	2	Traditional/Hardware
K250047	bite away two	Mibetec, GmbH	2025-09-12	2025-01-10	IRT	Physical Medicine	2	Traditional/Hardware
K252595	Stethophone Pro	Sparrow Acoustics, Inc.	2025-09-12	2025-08-15	DQD	Cardiovascular	2	Traditional/Hardware
K251170	Tangent Single-Use Digital System: Tangent Single-Use Digital Catheter and Tangent Digital Controller	Tangent Endoscopy, LLC	2025-09-12	2025-04-15	FBN	Gastroenterology, Urology	2	Traditional/Hardware
K252554	Wisdiag Multi-Drug Urine Test Cup; Wisdiag Multi-Drug Urine Home Test Cup	Vivachek Biotech (Hangzhou) Co., Ltd.	2025-09-12	2025-08-13	NFT	Clinical Toxicology	2	Traditional/Hardware
K250507	Hypertension Notification Feature (HTNF)	Apple, Inc.	2025-09-11	2025-02-21	SFR	Cardiovascular	2	Traditional/Hardware
K251158	PowerWire® 14 Radiofrequency Guidewire Kit	Baylis Medical Technologies, Inc.	2025-09-11	2025-04-15	PDU	Cardiovascular	2	Traditional/Hardware
K250797	UV5000 Handle	Uroviu Corporation	2025-09-11	2025-03-14	FAJ	Gastroenterology, Urology	2	Traditional/Hardware
K243926	Vivatmo pro-S	Bosch Healthcare Solutions GmbH	2025-09-11	2024-12-20	MXA	Clinical Toxicology	2	Traditional/Hardware
K251320	XTRA4	Al.Chi.Mi.A. S.R.L	2025-09-11	2025-04-29	LYX	Unknown	U	Traditional/Hardware
K252374	Nylon flexTAP(R)	Airway Technologies D/B/A Airway Management	2025-09-11	2025-07-30	LRK	Dental	2	Traditional/Hardware
K251316	Mazor X System / Mazor X Stealth Edition	Mazor Robotics , Ltd.	2025-09-11	2025-04-29	OLO	Neurology	2	Traditional/Hardware
K252520	SEFRIA_x0099_ Hydrocodone Oral Fluid	Immunalysis Corporation	2025-09-11	2025-08-11	DJG	Clinical Toxicology	2	Traditional/Hardware
K251758	Serafin®	Tns Co., Ltd.	2025-09-11	2025-06-09	NXC	Dental	2	Traditional/Hardware
K250216	OsteoProbe (OP-100)	Active Life Scientific, Inc.	2025-09-11	2025-01-24	QGQ	Orthopedic	2	Traditional/Hardware
K250464	Enlight 2100 (TPL-E2103-0)	Timpel S.A.	2025-09-10	2025-02-18	QEB	Anesthesiology	2	Traditional/Hardware
K251573	VizionFocus (somofilcon A) Silicone Hydrogel Soft (hydrophilic) Contact Lens	Vizionfocus, Inc.	2025-09-10	2025-05-22	LPL	Ophthalmic	2	Traditional/Hardware
K252173	F&P OptiNIV Hospital Vented Full Face Mask Compatible with Single-limb Circuits _x0096_ Size A (ONIV117A); F&P OptiNIV Hospital Vented Full Face Mask Compatible with Single-limb Circuits _x0096_ Size B (ONIV117B); F&P OptiNIV Hospital Vented Full Face Mask Compatible with Single-limb Circuits _x0096_ Size C (ONIV117C); F&P OptiNIV ONIV117-F Hospital Vented Full Face Mask with optional Expiratory …	Fisher &Paykel Healthcare , Ltd.	2025-09-10	2025-07-11	CBK	Anesthesiology	2	Traditional/Hardware
K252527	Surfacer Inside-Out Access Catheter System	Merit Medical System, Inc.	2025-09-10	2025-08-11	QJH	Cardiovascular	2	Traditional/Hardware
K252530	OptiVu_x0099_ Shoulder	Mr Surgical Solutions, LLC	2025-09-10	2025-08-11	SBF	Neurology	2	Traditional/Hardware
K252580	iQ200 Series	Beckman Coulter, Inc.	2025-09-10	2025-08-15	LKM	Hematology	2	Traditional/Hardware
K250734	OptiLUV Device	Pollogen, Ltd.	2025-09-10	2025-03-11	PBX	General, Plastic Surgery	2	Traditional/Hardware
K251817	da Vinci SP Surgical System (SP1098)	Intuitive Surgical, Inc.	2025-09-10	2025-06-13	NAY	Gastroenterology, Urology	2	Traditional/Hardware
K252524	Quadsense (Quadsense and Quadsense Pro)	Eventum Orthopaedics, Ltd.	2025-09-09	2025-08-11	ONN	Neurology	2	Traditional/Hardware
K250922	Edema Guard Monitor (EGM) CardioSet-001	Cardioset Medical , Ltd.	2025-09-09	2025-03-27	DSB	Cardiovascular	2	Traditional/Hardware
K250483	PhotonBlade 3; PhotonBlade 3 Smoke Evacuation	Stryker Instruments	2025-09-09	2025-02-19	GEI	General, Plastic Surgery	2	Traditional/Hardware
K251773	Water-soluble Personal Lubricant (Satin Gel Vitamin E flavor lubricant; Satin Gel Caramel flavor lubricant; Satin Gel Peach flavor lubricant; Satin Gel Strawberry flavor lubricant.)	Shenzhen Yongquan Medical Devices Co., Ltd.	2025-09-09	2025-06-10	NUC	Obstetrics/Gynecology	2	Traditional/Hardware
K251040	MissLan® Early Detection Digital Pregnancy Test; MissLan® Early Result Digital Pregnancy Test	Guangzhou Decheng Biotechnology Co., Ltd.	2025-09-09	2025-04-03	LCX	Clinical Chemistry	2	Traditional/Hardware
K252181	AquaA	Fresenius Medical Care North America	2025-09-09	2025-07-11	FIP	Gastroenterology, Urology	2	Traditional/Hardware
K243846	Access anti-HAV	Beckman Coulter, Inc.	2025-09-09	2024-12-16	LOL	Microbiology	2	Traditional/Hardware
K252180	Bicarby Dialysate RFP-404 (RFP-404-W); Bicarby Dialysate RFP-403 (RFP-403-W); Bicarby Dialysate RFP-403 (RFP-403-G); Bicarby Dialysate RFP-453 (RFP-453-W); Bicarby Dialysate RFP-453 (RFP-453-G); Bicarby Dialysate RFP-454 (RFP-454-W); Bicarby Dialysate RFP-454 (RFP-454-G); Bicarby Dialysate RFP-456 (RFP-456-W)	Fresenius Medical Care Renal Therapies Group, LLC	2025-09-09	2025-07-11	KPO	Gastroenterology, Urology	2	Traditional/Hardware
K251892	MAXXOS P.A.C.E. Foot & Ankle Plating System	Maxxos Medical GmbH	2025-09-08	2025-06-20	HRS	Orthopedic	2	Traditional/Hardware
K251394	Momcozy Wearable Breast Pump (BP223)	Shenzhen Root Innovation Technology Co., Ltd.	2025-09-08	2025-05-05	HGX	Obstetrics/Gynecology	2	Traditional/Hardware
K250960	DUO Microcatheter	Rev Neuro, LLC	2025-09-08	2025-03-31	QJP	Cardiovascular	2	Traditional/Hardware
K251227	da Vinci Surgical System (IS5000)	Intuitive Surgical, Inc.	2025-09-08	2025-04-21	NAY	Gastroenterology, Urology	2	Traditional/Hardware
K251957	Coaptium Connect with Tissium Light	Tissium SA	2025-09-08	2025-06-25	SFD	Neurology	2	Traditional/Hardware
K251754	Wearable Breast Pump (Model S33)	Shenzhen TPH Technology Co., Ltd.	2025-09-08	2025-06-09	HGX	Obstetrics/Gynecology	2	Traditional/Hardware
K250229	Dual Action Tissue Closure Device	Micro-Tech (Nanjing) Co., Ltd.	2025-09-08	2025-01-27	PKL	Gastroenterology, Urology	2	Traditional/Hardware
K252478	Vaccess_x0099_ CT Low-Profile Power-Injectable Implantable Port; Vaccess_x0099_ CT Power-Injectable Implantable Port; PowerPort_x0099_ duo M.R.I. _x0099_ Implantable Port	Bard Access Systems, Inc.	2025-09-05	2025-08-07	LJT	General Hospital	2	Traditional/Hardware
K250095	All-Suture Dual Anchor System	Suturetech, Inc.	2025-09-05	2025-01-14	MBI	Orthopedic	2	Traditional/Hardware
K251753	GenaCheck COVID-19 Rapid Self-Test	Genabio Diagnostics, Inc.	2025-09-05	2025-06-09	QYT	Microbiology	2	Traditional/Hardware
K244038	High Pressure Tubing	Shandong Int Medical Instruments Co., Ltd.	2025-09-05	2024-12-30	DXT	Cardiovascular	2	Traditional/Hardware
K252528	Ion Endoluminal System (IF1000)	Intuitive Surgical, Inc.	2025-09-05	2025-08-11	EOQ	Ear, Nose, Throat	2	Traditional/Hardware
K243795	pREBOA-PRO Catheter	Prytime Medical Devices, Inc.	2025-09-05	2024-12-10	MJN	Cardiovascular	2	Traditional/Hardware
K251317	SOLOPASS 2.0 System	Intravent Medical Partners	2025-09-05	2025-04-29	HAW	Neurology	2	Traditional/Hardware
K250132	Ureteral Access Sheath	Zhejiang Yigao Medical Technology Co., Ltd.	2025-09-05	2025-01-17	FED	Gastroenterology, Urology	2	Traditional/Hardware
K250460	WatchPAT400 (WP400)	Itamar Medical , Ltd.	2025-09-05	2025-02-18	MNR	Anesthesiology	2	Traditional/Hardware
K250353	Oniris; Oniris Plus	Oniris	2025-09-04	2025-02-07	LRK	Dental	2	Traditional/Hardware
K251444	Endoskeleton_x0099_ Interbody Systems	Medtronic Sofamor Danek USA, Inc.	2025-09-04	2025-05-09	MAX	Orthopedic	2	Traditional/Hardware
K243789	LIBERTY Endovascular Robotic System (LIBERTYOS)	Microbot Medical , Ltd.	2025-09-04	2024-12-09	DXX	Cardiovascular	2	Traditional/Hardware
K250893	Ball Joint Guide Array (66295)	Bayer Medical Care, Inc.	2025-09-04	2025-03-25	HAW	Neurology	2	Traditional/Hardware
K251781	KALA MINI 2.0 (KALA-04)	Shenzhen Kaiyan Medical Equipment Co., Ltd.	2025-09-04	2025-06-11	OHS	General, Plastic Surgery	2	Traditional/Hardware
K251737	NextAR(TM) Shoulder Platform	Medacta International S.A.	2025-09-04	2025-06-06	SBF	Neurology	2	Traditional/Hardware
K243700	Apollo TMS Therapy System	Mag & More GmbH	2025-09-04	2024-11-29	OBP	Neurology	2	Traditional/Hardware
K250770	Optina-4C (MHRC-C1N)	Optina Diagnostics, Inc.	2025-09-04	2025-03-13	HKI	Ophthalmic	2	Traditional/Hardware
K251298	Mobile Laser Unit (1001-N2); Thermoguide Workstation (1100-N1); Laser Applicator (4012-N5, 4017-N2, 4017-N4); MR Introducer (4013-N6)	Clinical Laserthermia Systems, AB	2025-09-04	2025-04-28	ONO	General, Plastic Surgery	2	Traditional/Hardware
K251463	EnSite_x0099_ X EP System, AutoMark Index Software License (ENSITE-AMI-01); EnSite_x0099_ X EP System, AutoMark Index Temporary Software License (ENSITE-D-AMI-01)	Abbott Medical	2025-09-04	2025-05-12	DQK	Cardiovascular	2	Traditional/Hardware
K251545	Intense Pulsed Light Therapy Device (MMABM-1)	Micowey Medical Equipment (Guangxi) Co., Ltd.	2025-09-04	2025-05-20	ONF	General, Plastic Surgery	2	Traditional/Hardware
K251510	Symani Surgical System	Medical Microinstruments, Inc.	2025-09-04	2025-05-16	SAQ	General, Plastic Surgery	2	Traditional/Hardware
K251726	SignalNED System (Model RE)	Forest Devices, Inc.	2025-09-03	2025-06-05	OMC	Neurology	2	Traditional/Hardware
K250231	Automatic Upper Arm Blood Pressure Monitor (BA-831X, BA-832X, BA-833X, BA-837X, BA-838X, BA-842X, BA-843X, BA-845X, BA-847X, BA-849X, BA-851X, BA-852X, BA-855X, BA-835, BA-836, BA-839, BA-840, BA-856)	Dongguan E-Test Technology Co., Ltd.	2025-09-03	2025-01-27	DXN	Cardiovascular	2	Traditional/Hardware
K250765	AViTA Arm Type Blood Pressure Monitor Cuff	Avita Corporation	2025-09-03	2025-03-13	DXQ	Cardiovascular	2	Traditional/Hardware
K250217	AGNES Ultra	Agnes Medical Co., Ltd.	2025-09-03	2025-01-24	GEI	General, Plastic Surgery	2	Traditional/Hardware
K252446	BruxZir® NOW	Prismatik Dentalcraft, Inc.	2025-09-03	2025-08-04	EIH	Dental	2	Traditional/Hardware
K252454	Kinos Total Ankle System	Restor3d	2025-09-03	2025-08-04	HSN	Orthopedic	2	Traditional/Hardware
K251457	Diode laser therapy device (VADER)	Beijing Superlaser Technology Co., Ltd.	2025-09-03	2025-05-12	GEX	General, Plastic Surgery	2	Traditional/Hardware
K251575	IdentiTi_x0099_ II ALIF Standalone Interbody System; Transcend_x0099_ ALIF Standalone Interbody System	Alphatec Spine	2025-09-03	2025-05-22	OVD	Orthopedic	2	Traditional/Hardware
K251909	NeurotriS (SX2500); NeurotriS (SX3800)	A-1 Engineering	2025-09-03	2025-06-20	NFO	Neurology	2	Traditional/Hardware
K231952	MEDILIGHT	Medicreations, LLC	2025-09-03	2023-06-30	ONF	General, Plastic Surgery	2	Traditional/Hardware
K250453	IntelliVue Patient Monitor 6100 (6100); IntelliVue Patient Monitor 6300 (6300); IntelliVue Patient Monitor 6500 (6500)	Philips Medizin Systeme Böblingen GmbH	2025-09-02	2025-02-18	MHX	Cardiovascular	2	Traditional/Hardware
K251615	Aerogen Pro-X1 Controller System	Aerogen, Ltd.	2025-09-02	2025-05-27	SFP	Anesthesiology	2	Traditional/Hardware
K251975	Achieve Partial Knee System - Porous Coated CoCrMo Femoral Component	Ignite Orthomotion	2025-09-02	2025-06-26	NJD	Orthopedic	2	Traditional/Hardware
K242768	Customized Abutment and Screw	Chengdu Besmile Medical Technology Co., Ltd.	2025-09-02	2024-09-13	NHA	Dental	2	Traditional/Hardware
K251775	RODIN Cement	Belport Company, Inc., Gingi-Pak	2025-09-02	2025-06-10	EMA	Dental	2	Traditional/Hardware
K251108	Erbe ESU Model VIO® 3n with Accessories	Erbe Elektromedizin GmbH	2025-08-29	2025-04-11	GEI	General, Plastic Surgery	2	Traditional/Hardware
K251814	EZ_x0099_ IV Administration Set	Epic Medical Pte. , Ltd.	2025-08-29	2025-06-13	FPA	General Hospital	2	Traditional/Hardware
K251217	SmartGuard technology; Predictive Low Glucose technology	Medtronic Minimed, Inc.	2025-08-29	2025-04-21	QJI	Clinical Chemistry	2	Traditional/Hardware
K243745	FG Bone Graft B	Full Golden Biotech Corporation	2025-08-29	2024-12-05	LYC	Dental	2	Traditional/Hardware
K250939	SIRIUS Endoscope System (PR-SI-1230)	Precision Robotics (Hong Kong) Limited	2025-08-29	2025-03-28	HET	Obstetrics/Gynecology	2	Traditional/Hardware
K251946	G aenial Universal Injectable II	GC America, Inc.	2025-08-29	2025-06-25	EBF	Dental	2	Traditional/Hardware
K250874	Sunrise	Sunrise SA	2025-08-29	2025-03-24	QRS	Ear, Nose, Throat	2	Traditional/Hardware
K250771	Primescan 2	Dentsply Sirona, Inc.	2025-08-29	2025-03-13	NTK	Dental	2	Traditional/Hardware
K250285	NEUROVENT-P (092946-003); NEUROVENT (092956-003); NEUROVENT-IFD-R (095317-003); NEUROVENT-IFD-S (091678-003); NEUROVENT-P-TEMP (094268-003); NEUROVENT-TEMP (094278-003); NEUROVENT-TEMP-IFD-R (095327-003); NEUROVENT-TEMP-IFD-S (094288-003); NEUROVENT-PTO (095008-003); NEUROVENT-PTO 2L (095108-003); NEUROVENT-PX (091580-003); BOLT-DRILL KIT CH5 (091888-003); BOLT-DRILL KIT CH9 (091898-003); BOLT-DR…	Raumedic AG	2025-08-29	2025-01-31	GWM	Neurology	2	Traditional/Hardware
K251480	PV01 PVDF Effort Sensor	Neurotronics, LLC	2025-08-29	2025-05-13	SFK	Neurology	2	Traditional/Hardware
K252392	Millipede70 Aspiration Catheter; Perfuze Aspiration Tube Set	Perfuze, Ltd.	2025-08-29	2025-07-31	NRY	Cardiovascular	2	Traditional/Hardware
K251727	GLAM LED Facial Mask (TB-2386F)	Touchbeauty Beauty & Health (Shenzhen) Co., Ltd.	2025-08-29	2025-06-05	GEX	General, Plastic Surgery	2	Traditional/Hardware
K252019	CurvaFix Low Profile System	Curvafix, Inc.	2025-08-29	2025-06-30	HWC	Orthopedic	2	Traditional/Hardware
K250335	IVA & AEON Cervical and Lumbar Cage System	K&J Consulting	2025-08-29	2025-02-05	ODP	Orthopedic	2	Traditional/Hardware
K250003	GENESEEQPRIME NGS Tumor Profiling Assay (FFPE) (GS6005)	Geneseeq Technology, Inc.	2025-08-29	2025-01-02	PZM	Pathology	2	Traditional/Hardware
K251324	da Vinci SP Surgical System (SP1098)	Intuitive Surgical, Inc.	2025-08-29	2025-04-29	NAY	Gastroenterology, Urology	2	Traditional/Hardware
K252364	Edwards eSheath Optima introducer set	Edwards Lifesciences	2025-08-29	2025-07-29	DYB	Cardiovascular	2	Traditional/Hardware
K252380	Invisalign System	Align Technology, Inc.	2025-08-29	2025-07-30	NXC	Dental	2	Traditional/Hardware
K243799	Fetal Pillow	Coopersurgical Inc.,	2025-08-29	2024-12-11	PWB	Obstetrics/Gynecology	2	Traditional/Hardware
K251718	ArTT Augments and Buttresses and Bone Screws	Lima Corporate S.P.A.	2025-08-29	2025-06-04	LPH	Orthopedic	2	Traditional/Hardware
K251181	Splashwire Hydrophilic Guide Wire (MSWSTD35180J1O5); Splashwire Hydrophilic Guide Wire (MSWSTD35260J1O5); Splashwire Hydrophilic Guide Wire (MSWSTDA35150LT); Splashwire Hydrophilic Guide Wire (MSWSTFA35260LT); Splashwire Hydrophilic Guide Wire (MSWSTFA35150LT); Splashwire Hydrophilic Guide Wire (MSWSTFS38150LT)	Merit Medical Ireland, Ltd.	2025-08-29	2025-04-16	DQX	Cardiovascular	2	Traditional/Hardware
K252505	Powder-Free Vinyl Exam Gloves, clear	Basic Medical Technology, Inc.	2025-08-28	2025-08-08	LYZ	General Hospital	1	Traditional/Hardware
K252350	da Vinci SP Firefly Imaging System	Intuitive Surgical, Inc.	2025-08-28	2025-07-29	NAY	Gastroenterology, Urology	2	Traditional/Hardware
K252057	Symphony_x0099_ Thrombectomy System and Symphony_x0099_ 16F 82cm Thrombectomy System	Imperative Care, Inc.	2025-08-28	2025-07-01	QEW	Cardiovascular	2	Traditional/Hardware
K243767	SV600, SV800 Ventilator	Shenzhen Mindray Bio-Medical Electronics Co., Ltd.	2025-08-28	2024-12-06	CBK	Anesthesiology	2	Traditional/Hardware
K250148	Medical Gas Analyzer (AG200)	Prior Care Science Technology, Ltd.	2025-08-28	2025-01-21	CCK	Anesthesiology	2	Traditional/Hardware
K251594	truFlex	Syrma Johari Medtech Limited	2025-08-28	2025-05-27	NGX	Physical Medicine	2	Traditional/Hardware
K252411	JARVIS Glenoid Reverse Shoulder Prosthesis	FH Industrie	2025-08-28	2025-08-01	PHX	Orthopedic	2	Traditional/Hardware
K243901	SmartPilot YpsoMate NS-A2.25	Ypsomed AG	2025-08-28	2024-12-19	QOG	General Hospital	2	Traditional/Hardware
K252383	Somfit D	Compumedics Limited	2025-08-28	2025-07-31	MNR	Anesthesiology	2	Traditional/Hardware
K251429	OTC 4-Channel Rechargeable TENS Unit	Changsha Anxiang Medical Technology Co., Ltd.	2025-08-28	2025-05-08	NUH	Neurology	2	Traditional/Hardware
K251965	Proximity Anterior Cervical Plate System; Segmental Plating System (SPS)	Alphatec Spine, Inc.	2025-08-28	2025-06-26	KWQ	Orthopedic	2	Traditional/Hardware
K252437	JAZZ Spinal System	Implanet	2025-08-28	2025-08-01	NKB	Orthopedic	2	Traditional/Hardware
K252030	RadiForce GX570; RadiForce GX570-AR	Eizo Corporation	2025-08-28	2025-06-30	PGY	Radiology	2	Traditional/Hardware
K250625	Portable oxygen concentrator (W-R1(MAX)); Portable oxygen concentrator (W-R1); Portable oxygen concentrator (W-R2); Portable oxygen concentrator (W-R2(Lite))	Nanjing Yinuoji Medical Technology Co., Ltd.	2025-08-27	2025-03-03	CAW	Anesthesiology	2	Traditional/Hardware
K251382	Phoenix Sinus Tarsi Stent System	Astra Orthomed, Inc.	2025-08-27	2025-05-02	HWC	Orthopedic	2	Traditional/Hardware
K251068	KnoxFog Anti-fogging Device	Uv One Hygienics, Inc.	2025-08-27	2025-04-07	OCT	Gastroenterology, Urology	2	Traditional/Hardware
K251415	Additively Manufactured Aligner Resin	Aidite (Qinhuangdao) Technology Co., Ltd.	2025-08-27	2025-05-07	NXC	Dental	2	Traditional/Hardware
K251716	Nitrile Powder-Free Exam Gloves Tested for Use with Chemotherapy Drugs, Opioid Fentanyl Citrate, Simulated Gastric Acid and Xylazine in Fentanyl Citrate	Basic Medical Technology, Inc.	2025-08-27	2025-06-04	LZA	General Hospital	1	Traditional/Hardware
K252118	CLUNGENE Multi-Drug Test Easy Cup; CLUNGENE Multi-Drug Home Test Easy Cup	Hangzhou Clongene Biotech Co., Ltd.	2025-08-27	2025-07-07	NFT	Clinical Toxicology	2	Traditional/Hardware
K252419	HOTWIRE RF GUIDEWIRE (901XXX); HOTWIRE RF GUIDEWIRE (902XXX)	Atraverse Medical, Inc.	2025-08-27	2025-08-01	DXF	Cardiovascular	2	Traditional/Hardware
K250080	QIAstat-Dx Respiratory Panel Plus; QIAstat-Dx Respiratory Panel Mini	QIAGEN GmbH	2025-08-27	2025-01-13	QOF	Microbiology	2	Traditional/Hardware
K251752	Flexible Bronchoscope (BS27U-12EU, BS27U-12US, BS38U-20EU, BS38U-20US)	Shanghai AnQing Medical Instrument Co., Ltd.	2025-08-27	2025-06-09	EOQ	Ear, Nose, Throat	2	Traditional/Hardware
K243774	ELID (Endoscopic Less Invasive Decompression) System	Lesspine Innovations	2025-08-27	2024-12-06	HRX	Orthopedic	2	Traditional/Hardware
K243687	Vital Signs	Oxehealth Limited	2025-08-27	2024-11-29	QME	Cardiovascular	2	Traditional/Hardware
K241766	QMAPP® (Hemo, Hemo Lite, PCM, GO, Hybrid)	Fysicon BV	2025-08-27	2024-06-20	MWI	Cardiovascular	2	Traditional/Hardware
K243166	Dermalage	Infection Elimination Solutions, LLC	2025-08-27	2024-09-30	FRO	Unknown	U	Traditional/Hardware
K251637	Dewin Reproductive Media (Dewin Gamete Buffer [with HSA and without HSA]; Dewin Follicle Flushing Solution, Dewin One Step medium [with HSA and without HSA])	Donnevie Medical Technology (Shanghai) Co. , Ltd.	2025-08-27	2025-05-29	MQL	Obstetrics/Gynecology	2	Traditional/Hardware
K251305	Ultra-Fast Vitri; Ultra-Fast Warm	Kitazato Corporation	2025-08-26	2025-04-28	MQL	Obstetrics/Gynecology	2	Traditional/Hardware
K244061	X-Wire Guidewire	Imperative Care, Inc.	2025-08-26	2024-12-31	MOF	Cardiovascular	2	Traditional/Hardware
K250261	Heager Medical Laser Family (Sabrina/Adolf)	Heager GmbH	2025-08-26	2025-01-29	GEX	General, Plastic Surgery	2	Traditional/Hardware
K250049	Medical Video Endoscope [Standard Deflection] (URS3005); Medical Video Endoscope [Reverse Deflection] (URS3005E); Medical Video Endoscope [Standard Deflection] (URS3006); Medical Video Endoscope [Reverse Deflection] (URS3006E); Medical Video Endoscope [Standard Deflection] (URS3016); Medical Video Endoscope [Reverse Deflection] (URS3016E); Image processor (DIS8000)	Seplou (Zhuhai) Co., Ltd.	2025-08-26	2025-01-10	FGB	Gastroenterology, Urology	2	Traditional/Hardware
K251440	CRYOcheck Chromogenic Factor VIII	Precision Biologic, Inc.	2025-08-25	2025-05-09	GGP	Hematology	2	Traditional/Hardware
K251404	Quantra QStat Cartridge	Hemosonics, LLC	2025-08-25	2025-05-06	QFR	Hematology	2	Traditional/Hardware
K251246	Sparrow Ascent	Spark Biomedical, Inc.	2025-08-25	2025-04-22	PZR	Neurology	2	Traditional/Hardware
K251593	DenMat Multilayered Zirconia Disc	Denmat Holding, LLC	2025-08-25	2025-05-27	EIH	Dental	2	Traditional/Hardware
K243834	NobelZygoma TiUltra Implant system	Nobel Biocare AB	2025-08-25	2024-12-13	DZE	Dental	2	Traditional/Hardware
K243800	PRO Pen Microneedling System (6883)	Dermalogica, LLC	2025-08-25	2024-12-11	QAI	General, Plastic Surgery	2	Traditional/Hardware
K243709	NeuroEars-Anna_x0099_	Neuroears, Inc.	2025-08-25	2024-12-02	GWN	Neurology	2	Traditional/Hardware
K251811	Motor and Apex Module (MaAM)	Dentsply Sirona, Inc.	2025-08-25	2025-06-12	EBW	Dental	1	Traditional/Hardware
K243634	Maxx Libertas Bipolar Hip Head (Bipolar Hip)	Maxx Orthopedics, Inc.	2025-08-25	2024-11-25	KWY	Orthopedic	2	Traditional/Hardware
K243692	EnDrive (EnDriveUS)	Advanced Technology Research (A.T.R.) S.R.L.	2025-08-22	2024-11-29	EKX	Dental	1	Traditional/Hardware
K251277	CoraForce Microcatheter, CoraFlex Microcatheter	Reflow Medical, Inc.	2025-08-22	2025-04-24	DQY	Cardiovascular	2	Traditional/Hardware
K251828	CEREGLIDE 71 Catheter System; Cerenovus Aspiration Tubing Set	Cerenovus, Inc.	2025-08-22	2025-06-13	NRY	Cardiovascular	2	Traditional/Hardware
K251604	CareSuperb COVID-19/Flu A&B Antigen Combo Home Test	Access Bio, Inc.	2025-08-22	2025-05-27	SCA	Microbiology	2	Traditional/Hardware
K252302	CARTO_x0099_ 3 EP Navigation System V8.1	Biosense Webster, Inc.	2025-08-22	2025-07-24	DQK	Cardiovascular	2	Traditional/Hardware
K250147	CPS Locator 3D Delivery Catheter	Centerpoint Systems	2025-08-22	2025-01-21	DQY	Cardiovascular	2	Traditional/Hardware
K252303	Stem Extension Line (USTAR II System)	United Orthopedic Corporation	2025-08-22	2025-07-24	KRO	Orthopedic	2	Traditional/Hardware
K251884	One-Fil Putty Injectable	Mediclus Co., Ltd.	2025-08-22	2025-06-20	KIF	Dental	2	Traditional/Hardware
K241152	InSee	Tidal Medical Technologies, LLC	2025-08-21	2024-04-26	BWF	Anesthesiology	2	Traditional/Hardware
K251647	MIS C1 Implant System, MIS Seven Implant System, MIS M4 Implant System, MIS Lance+ Implant System, MIS Lance+ Conical Connection System	Dentsply Sirona, Inc.	2025-08-21	2025-05-29	DZE	Dental	2	Traditional/Hardware
K250994	ClearTip FNA and FNB Types	Finemedix Co., Ltd.	2025-08-21	2025-04-01	FCG	Gastroenterology, Urology	2	Traditional/Hardware
K251130	Portable Oxygen Concentrator (JM-P50A)	Jiangsu Jumao X-Care Medical Equipment Co., Ltd.	2025-08-21	2025-04-11	CAW	Anesthesiology	2	Traditional/Hardware
K251588	LED Light Therapy Mask (FCM902, FCM905, FCM906, FCM908, 11-001-RBMASK, FCM910)	Shenzhen Fittop Health Technology Co., Ltd.	2025-08-21	2025-05-23	OHS	General, Plastic Surgery	2	Traditional/Hardware
K243965	Origin_x0099_	Nerv Technology Inc. (D.B.A.) Fluidai Medical	2025-08-21	2024-12-23	SFO	Clinical Chemistry	2	Traditional/Hardware
K250784	Transcutaneous Electrical Nerve Stimulator ( K6133/ K6134/ K6135/ K6136/ K6137/ K6138/ K6139/ K6140/ K6141/ K6142/ K6143/ K6144/ K6122)	Shenzhen Yicai Health Technology Co., Ltd.	2025-08-21	2025-03-14	NUH	Neurology	2	Traditional/Hardware
K251135	Treace Medical Concepts (TMC) Implant Fixation System	Treace Medical Concepts	2025-08-21	2025-04-14	HRS	Orthopedic	2	Traditional/Hardware
K252356	The Acumed Wrist Fixation System - 2.4mm Screws	Acumed, LLC	2025-08-21	2025-07-29	HRS	Orthopedic	2	Traditional/Hardware
K252244	Disposable Powder Free Nitrile Examination Glove, Blue Color, Tested For Use With Chemotherapy Drugs, Fentanyl Citrate, Xylazine, Gastric acid, Fentanyl in Gastric acid and Xylazine in Gastric acid	Ever Global (Vietnam) Enterprise Corporation	2025-08-21	2025-07-18	LZA	General Hospital	1	Traditional/Hardware
K250923	Fine Osteotomy_x0099_	Bodycad Laboratories, Inc.	2025-08-21	2025-03-27	HRS	Orthopedic	2	Traditional/Hardware
K252061	Distal Xtremities System	TriMed, Inc.	2025-08-20	2025-07-01	HRS	Orthopedic	2	Traditional/Hardware
K251229	EndoFix_x0099_Tissue Fixation System	Softac Medical Technologies	2025-08-20	2025-04-21	FGE	Gastroenterology, Urology	2	Traditional/Hardware
K250417	Remanufactured EndoWrist Cobra Grasper (420190)	Rebotix	2025-08-20	2025-02-13	QSM	Gastroenterology, Urology	2	Traditional/Hardware
K251471	IPD Dental Implant Abutments	Implant Protesis Dental 2004, S.L.	2025-08-20	2025-05-13	NHA	Dental	2	Traditional/Hardware
K252104	T1D1	Comerge AG	2025-08-20	2025-07-03	NDC	Anesthesiology	2	Traditional/Hardware
K251563	WELLlife Flu A&B Home Test; WELLlife Influenza A&B Test	Wondfo USA Co., Ltd.	2025-08-20	2025-05-22	SCA	Microbiology	2	Traditional/Hardware
K250383	Wearable Breast Pump (Model W6)	Shenzhen TPH Technology Co., Ltd.	2025-08-20	2025-02-11	HGX	Obstetrics/Gynecology	2	Traditional/Hardware
K250721	LOCATOR® Angled Abutment	Zest Anchors, LLC	2025-08-20	2025-03-10	NHA	Dental	2	Traditional/Hardware
DEN250002	Delphi-MD System	Quantalx Neuroscience, Ltd.	2025-08-20	2025-01-03	SFN	Neurology	2	Traditional/Hardware
K243713	Single Use RF Surgical Electrode (Needle Type) (AN-B, AN-C, AN-E, AN-I, AN-S, AN-W3A, AN-F3A, AN-IL, AN-SL, AN-W3B, AN-F1A, AN-F3B, AN-B3A)	Agnes Medical Co., Ltd.	2025-08-19	2024-12-02	GEI	General, Plastic Surgery	2	Traditional/Hardware
K252022	OSSIOfiber® Interference Screw	OSSIO , Ltd.	2025-08-19	2025-06-30	MAI	Orthopedic	2	Traditional/Hardware
K250399	Remanufactured EndoWrist Cadiere Forceps (420049)	Rebotix	2025-08-19	2025-02-12		Unknown		Traditional/Hardware
K250313	Sterile Powder Free Synthetic Rubber Surgeon_x0092_s Gloves, Green Color, Tested For Use With Chemotherapy Drugs and Gastric Acid	Harps Europe Manufacturing GmbH	2025-08-19	2025-02-03	KGO	General, Plastic Surgery	1	Traditional/Hardware
K250387	Remanufactured EndoWrist Long Tip Forceps (420048)	Rebotix	2025-08-19	2025-02-11	QSM	Gastroenterology, Urology	2	Traditional/Hardware
K252316	Venclose digiRF Generator (VCRFG1); Venclose EVSRF Catheter (VC10A256F60, VC10A256F100)	Venclose, Inc.	2025-08-19	2025-07-25	GEI	General, Plastic Surgery	2	Traditional/Hardware
K250539	Remanufactured EndoWrist Tenaculum Forceps (420207)	Rebotix	2025-08-19	2025-02-24	QSM	Gastroenterology, Urology	2	Traditional/Hardware
K243539	Apollo TMS Therapy System	Mag & More GmbH	2025-08-18	2024-11-15	OBP	Neurology	2	Traditional/Hardware
K243604	Halyard Purple Nitrile-XTRA* Powder-Free Exam Gloves, Low Dermatitis Potential, Tested for Use with Chemotherapy Drugs, Fentanyl Citrate and Fentanyl Citrate in Simulated Gastric Acid	O&M Halyard, Inc.	2025-08-18	2024-11-21	LZA	General Hospital	1	Traditional/Hardware
K250167	Evolution Spine Navigation Instruments	Evolution Spine	2025-08-18	2025-01-21	OLO	Neurology	2	Traditional/Hardware
K251161	ANTHEM® Fracture System	Globus Medical, Inc.	2025-08-18	2025-04-15	HRS	Orthopedic	2	Traditional/Hardware
K250271	Neodent Implant System - Zirconia Implant System	JJGC Indústria e Comércio de Materiais Dentários S.A.	2025-08-18	2025-01-30	DZE	Dental	2	Traditional/Hardware
K251913	OsteoCentric® UnifiMI® TCS Plating System	OsteoCentric Technologies	2025-08-16	2025-06-23	HRS	Orthopedic	2	Traditional/Hardware
K251243	OneRF Trigeminal Nerve Radiofrequency Probes	Neuroone Medical Technologies Corp.	2025-08-15	2025-04-22	GXI	Neurology	2	Traditional/Hardware
K251969	Atlas Spine Project X Expandable Posterior Lumbar Interbody System	Atlas Spine, Inc.	2025-08-15	2025-06-26	MAX	Orthopedic	2	Traditional/Hardware
K250620	KLS Martin Ixos System	KLS Martin L.P.	2025-08-15	2025-02-28	HRS	Orthopedic	2	Traditional/Hardware
K252236	CP Relief Wand Rx - TENS/NMES	N & C Holdings, LLC	2025-08-15	2025-07-17	GZJ	Neurology	2	Traditional/Hardware
K250867	Dunamis Screw and Suture Locking System	Dunamis Medical, LLC	2025-08-15	2025-03-24	HWC	Orthopedic	2	Traditional/Hardware
K251877	JMS CAVEO A.V. Fistula Needle Set	JMS North America Corporation	2025-08-15	2025-06-18	FIE	Gastroenterology, Urology	2	Traditional/Hardware
K243650	Zio® monitor (DFG0001)	iRhythm Technologies, Inc.	2025-08-15	2024-11-26	DSH	Cardiovascular	2	Traditional/Hardware
K251972	Healgen® AccuFluor Fentanyl Fluorescence Immunoassay (FIA)Test Kit - Qualitative; Healgen® Immunofluorescence Analyzer (OG-H180)	Healgen Scientific, LLC	2025-08-15	2025-06-26	DJG	Clinical Toxicology	2	Traditional/Hardware
K250397	Helios Dermal Scaffold	Helios Biomedical, Inc.	2025-08-15	2025-02-12	KGN	Unknown	U	Traditional/Hardware
K250818	Nerveblox	Smart Alfa Teknoloji San. Ve Tic. A.S.	2025-08-15	2025-03-18	QRG	Anesthesiology	2	Traditional/Hardware
K252259	AssureTech Quick Cup Tests; AssureTech Multi-drug Urine Test Cup	Assure Tech., LLC	2025-08-15	2025-07-21	NFT	Clinical Toxicology	2	Traditional/Hardware
K251871	FEATHER 01 02 03 04 (Model:01)	Heat IN A Click, LLC	2025-08-15	2025-06-18	OHS	General, Plastic Surgery	2	Traditional/Hardware
K243851	CHLOE BLAST	Fairtility , Ltd.	2025-08-15	2024-12-16	PBH	Obstetrics/Gynecology	2	Traditional/Hardware
K251834	Persona Partial Knee	Zimmer Biomet	2025-08-15	2025-06-16	HSX	Orthopedic	2	Traditional/Hardware
K251012	TRUDERMAL Pro (ZLD-390)	Shenzhen Kaiyan Medical Equipment Co., Ltd.	2025-08-14	2025-04-02	OHS	General, Plastic Surgery	2	Traditional/Hardware
K251062	Geistlich Bio-Gide; Geistlich Bio-Gide® Shape; Geistlich Bio-Gide® Compressed; Geistlich Bio-Gide® Forte; Geistlich Bio-Gide® Perio; Geistlich Combi-Kit Collagen®; Geistlich Perio-System Combi Pack	Geistlich Pharma AG	2025-08-14	2025-04-04	NPL	Dental	2	Traditional/Hardware
K243905	Stitch Cerclage _x0096_ Suture Tapes	GM Dos Reis Industria e Comercio Ltda.	2025-08-14	2024-12-19	JDQ	Orthopedic	2	Traditional/Hardware
K243544	BIOFIRE SPOTFIRE Respiratory/Sore Throat Panel Mini	Biofire Diagnostics, LLC	2025-08-14	2024-11-15	QOF	Microbiology	2	Traditional/Hardware
K250916	WinForth (LM-E470KA)	Shenzhen Leaflife Technology Co., Ltd.	2025-08-14	2025-03-27	PBX	General, Plastic Surgery	2	Traditional/Hardware
K243437	mOm Essential Incubator (ME1)	Mom Incubators Limited	2025-08-14	2024-11-05	FMZ	General Hospital	2	Traditional/Hardware
K250164	Cassette Autoclave (ACA5)	Guangzhou Ajax Medical Equipment Co., Ltd.	2025-08-14	2025-01-21	FLE	General Hospital	2	Traditional/Hardware
K243600	3nethra neo HD FA; 3nethra neo HD	Forus Health Pvt.Ltd	2025-08-14	2024-11-21	HKI	Ophthalmic	2	Traditional/Hardware
K250898	Reprocessed HARMONIC 700 Shears (HAR723/Reprocessed HARMONIC 700, 5mm Diameter Shears with Advanced Hemostasis x 23cm); Reprocessed HARMONIC 700 Shears (HAR736/Reprocessed HARMONIC 700, 5mm Diameter Shears with Advanced Hemostasis x 36cm); Reprocessed HARMONIC 700 Shears (HAR745/Reprocessed HARMONIC 700, 5mm Diameter SHears with Advanced Hemostasis x 45cm)	Stryker Sustainability Solutions	2025-08-14	2025-03-25	NLQ	Unknown	U	Traditional/Hardware
K251526	FilmArray GI Control Panel M238	Maine Molecular Quality Controls, Inc.	2025-08-14	2025-05-19	PMN	Microbiology	2	Traditional/Hardware
K252192	Wearable Breast Pump (P9, P10, P16, P20, P21, P22, P23, P25)	Huizhou Lvb Maternal and Infant Supplies Co., Ltd.	2025-08-13	2025-07-14	HGX	Obstetrics/Gynecology	2	Traditional/Hardware
K251569	Bone Screw	Osstem Implant Co., Ltd.	2025-08-13	2025-05-22	DZL	Dental	2	Traditional/Hardware
K251519	RelieVRx (Pico G3)	Appliedvr	2025-08-13	2025-05-16	QRA	Neurology	2	Traditional/Hardware
K243279	DOLORCLAST Focused Shock Waves	E.M.S Electro Medical Systems S.A	2025-08-13	2024-10-16	PZL	General, Plastic Surgery	2	Traditional/Hardware
K252201	HS Fiber	Riverpoint Medical	2025-08-13	2025-07-14	GAT	General, Plastic Surgery	2	Traditional/Hardware
K251495	MBT Compass HT CA Software; MBT FAST Shuttle US IVD	Bruker Daltonics GmbH & Co. KG	2025-08-13	2025-05-15	QBN	Microbiology	2	Traditional/Hardware
K243653	KARL STORZ HOPKINS Telescopes for Urology	Karl Storz SE & CO. KG	2025-08-13	2024-11-26	FAJ	Gastroenterology, Urology	2	Traditional/Hardware
K250841	Electrotherapy Electrodes	Baisheng Medical Co., Ltd.	2025-08-13	2025-03-20	GXY	Neurology	2	Traditional/Hardware
K251033	Unscented menstrual long applicator tampon; Unscented menstrual Compact Applicator Tampon; Unscented menstrual Cardboard Applicator Tampon; Unscented menstrual Digital Tampons	Unibeauty (Hubei) Technology Co., Ltd.	2025-08-13	2025-04-03	HEB	Obstetrics/Gynecology	2	Traditional/Hardware
K252226	Dual Lumen Extended Length Catheter (dELC), 6F, 12cm (320101); Dual Lumen Extended Length Catheter (dELC), 6F, 16 cm (320102)	Nuwellis, Inc.	2025-08-13	2025-07-16	NQJ	Gastroenterology, Urology	2	Traditional/Hardware
K251046	S.I.N. Dental Implant System	S.I.N. Implant System Ltda	2025-08-13	2025-04-03	DZE	Dental	2	Traditional/Hardware
K243579	AeroJet Ventilation Catheter	Pipeline Medical Products, LLC	2025-08-13	2024-11-19	BTR	Anesthesiology	2	Traditional/Hardware
K250931	Unimed Reusable SpO2 Sensors (-117 and -121 Series) (U403-117); Unimed Reusable SpO2 Sensors (-117 and -121 Series) (U103-117); Unimed Reusable SpO2 Sensors (-117 and -121 Series) (U410-121); Unimed Reusable SpO2 Sensors (-117 and -121 Series) (U110-121)	Unimed Medical Supplies, Inc.	2025-08-13	2025-03-28	DQA	Cardiovascular	2	Traditional/Hardware
K251494	Eko Foundation Analysis Software with Transformers (EFAST)	Eko Health, Inc.	2025-08-12	2025-05-15	DQD	Cardiovascular	2	Traditional/Hardware
K251879	Sulopenem SPM 2 µg	Liofilchem	2025-08-12	2025-06-18	JTN	Microbiology	2	Traditional/Hardware
K250836	14F Duo-Flow® Side X Side Double Lumen Catheter	Medical Components, Inc.	2025-08-12	2025-03-20	MPB	Gastroenterology, Urology	2	Traditional/Hardware
K243562	CuffGuard	Idmed	2025-08-12	2024-11-18	BSK	Anesthesiology	2	Traditional/Hardware
K250294	Straumann® RidgeFit Implants	Institut Straumann AG	2025-08-12	2025-01-31	DZE	Dental	2	Traditional/Hardware
K252083	HOTWIRE_x0099_ System RF Generator and Footswitch (optional accessory)	Atraverse Medical, Inc.	2025-08-12	2025-07-02	GEI	General, Plastic Surgery	2	Traditional/Hardware
K250207	eufy Wearable Breast Pump S1 (T8D02); eufy Wearable Breast Pump E10 (T8D03)	Anker Innovations Limited	2025-08-11	2025-01-24	HGX	Obstetrics/Gynecology	2	Traditional/Hardware
K252211	Duoblade Plus SE (DB1EP, DB1EP-T, DB1EP-H, DB1EP-TH); Duoblade Prime (DB1P, DB1P-T, DB1P-H, DB1P-TH)	Cnc Technologies	2025-08-11	2025-07-15	GEI	General, Plastic Surgery	2	Traditional/Hardware
K251327	XERF	Lutronic Corporation	2025-08-11	2025-04-30	GEI	General, Plastic Surgery	2	Traditional/Hardware
K251823	UE BRONCHO Single-Use Bronchoscopes (EBS-380C); UE BRONCHO Single-Use Bronchoscopes (EBS-500C); UE BRONCHO Single-Use Bronchoscopes (EBS-600C); UE Display (UE-M10S)	Zhejiang UE Medical Corp.	2025-08-11	2025-06-13	EOQ	Ear, Nose, Throat	2	Traditional/Hardware
K251098	Identity Revision Humeral Stems	Zimmer, Inc.	2025-08-11	2025-04-10	MBF	Orthopedic	2	Traditional/Hardware
K251245	OxyMinder Pro (10310)	Bio-Med Device, Inc.	2025-08-11	2025-04-22	CCL	Anesthesiology	2	Traditional/Hardware
K250462	UL UHD-Clear View 4K Camera System (UL-3Chip 4K)	Univlabs Technologies Private Limited	2025-08-11	2025-02-18	FET	Gastroenterology, Urology	2	Traditional/Hardware
K241731	Outlook Surgical Versa One System (8900139)	Resnent, LLC	2025-08-11	2024-06-17	EOB	Ear, Nose, Throat	2	Traditional/Hardware
K251125	MagVenture TMS Therapy System	Tonica Elektronik A/S	2025-08-11	2025-04-11	OBP	Neurology	2	Traditional/Hardware
K251862	External Fixation Bone Distractor	Paragon 28, Inc.	2025-08-11	2025-06-17	KTT	Orthopedic	2	Traditional/Hardware
K243395	MICOR 700 with Auto I/A	Carl Zeiss Meditec Cataract Technology, Inc.	2025-08-08	2024-10-31	HQC	Ophthalmic	2	Traditional/Hardware
K250817	Coretech Compression System (Coretech RHB3003)	Vive Health, LLC	2025-08-08	2025-03-18	JOW	Cardiovascular	2	Traditional/Hardware
K243254	Parkell Pit and Fissure Sealant	Parkell, Inc.	2025-08-08	2024-10-15	EBC	Dental	2	Traditional/Hardware
K243531	Codman Libertís Shunt Catheter with Bactiseal and Endexo Technology	Integra Lifesciences Production Corporation	2025-08-08	2024-11-14	JXG	Neurology	2	Traditional/Hardware
K251226	Aqua Medical RF Vapor Ablation System	Aqua Medical, Inc.	2025-08-08	2025-04-21	KNS	Gastroenterology, Urology	2	Traditional/Hardware
K252176	Single-Use Video Flexible Cysto-Nephroscope (RP-U-C01F, RP-U-C01FS)	Guangzhou Red Pine Medical Instrument Co., Ltd.	2025-08-08	2025-07-11	FAJ	Gastroenterology, Urology	2	Traditional/Hardware
K250540	SABER-C System	Elevation Spine	2025-08-08	2025-02-24	OVE	Orthopedic	2	Traditional/Hardware
K251801	Diode laser device (BM091)	Hebei Newangie Technology Co., Ltd.	2025-08-08	2025-06-12	GEX	General, Plastic Surgery	2	Traditional/Hardware
K251119	MagVenture TMS Therapy System	Tonica Elektronik A/S	2025-08-08	2025-04-11	OBP	Neurology	2	Traditional/Hardware
K250142	Water-based Lubricant	Global Protection Corp.	2025-08-08	2025-01-17	NUC	Obstetrics/Gynecology	2	Traditional/Hardware
K250718	swiftPro System (SWF-SPS); Swift System (SWF-SYS)	Emblation Limited	2025-08-08	2025-03-10	NEY	General, Plastic Surgery	2	Traditional/Hardware
K252170	OptiVu_x0099_ Shoulder	Mr Surgical Solutions, LLC	2025-08-08	2025-07-10	SBF	Neurology	2	Traditional/Hardware
K250472	SixFix_x0099_ Hexapod Fixator and Deformity Analysis and Correction Software (DACS)	Amdt Holdings, Inc.	2025-08-08	2025-02-18	KTT	Orthopedic	2	Traditional/Hardware
K243021	Longboard Revision Hip Stem	Signature Orthopaedics Pty, Ltd.	2025-08-07	2024-09-27	LZO	Orthopedic	2	Traditional/Hardware
K251247	GX1 Radiofrequency Generator Kit (RFG-X1-120V); GX1 Radiofrequency Generator Kit (RFG-X1-220V); GX1 Radiofrequency Generator Kit (RFG-X1-240V); GX1 System Release Rest of World (GX1-SYS-ROW); GX1 Radiofrequency Generator (51779845-01); GX1 Radiofrequency Generator (51779845-02); GX1 Radiofrequency Generator (51779845-03)	Boston Scientific Neuromodulation Corporation	2025-08-07	2025-04-23	GXD	Neurology	2	Traditional/Hardware
K243765	LuMon(TM) System	Sentec AG	2025-08-07	2024-12-06	QEB	Anesthesiology	2	Traditional/Hardware
K250622	Succession_x0099_ AFN System	Ortho Solutions UK , Ltd.	2025-08-07	2025-02-28	HSB	Orthopedic	2	Traditional/Hardware
K251667	LED Light Therapy Mask (M01, M02, M06, M07, M08, M09)	Shenzhen Liyoutong Technology Co., Ltd.	2025-08-07	2025-05-30	OHS	General, Plastic Surgery	2	Traditional/Hardware
K250309	BTL-199	BTL Industries, Inc.	2025-08-07	2025-02-03	QPL	Neurology	2	Traditional/Hardware
K250130	Viction Disposable Irrigation and suction System (VC-FLA0514; VC-FLA0523; VC-FLA0532; VC-FLB0514; VC-FLB0523; VC-FLB0532; VC-FLC0514; VC-FLC0523; VC-FLC0532; VC-FLD0514; VC-FLD0523; VC-FLD0532)	Hangzhou Viction Medical Technology Co.,Ltd	2025-08-06	2025-01-17	GCJ	Gastroenterology, Urology	2	Traditional/Hardware
K251432	Olo	El.En S.P.A.	2025-08-06	2025-05-08	GEX	General, Plastic Surgery	2	Traditional/Hardware
K251854	SteadiSet infusion set	Tandem Diabetes Care	2025-08-06	2025-06-17	FPA	General Hospital	2	Traditional/Hardware
K242895	Aevumed PHANTOM Suture Anchors	Aevumed, Inc.	2025-08-06	2024-09-23	MBI	Orthopedic	2	Traditional/Hardware
K250569	Cardiologs Holter Platform	Philips France Commercial	2025-08-06	2025-02-26	DPS	Cardiovascular	2	Traditional/Hardware
K243552	Codman Libertís_x0099_ 1.5 mm EVD Catheter with Bactiseal® and Endexo® Technology with Luer Connection (821761); Codman Libertís_x0099_ 1.9 mm EVD Catheter with Bactiseal® and Endexo® Technology with Luer Connection (821762)	Integra Lifesciences Production Corporation	2025-08-06	2024-11-15	JXG	Neurology	2	Traditional/Hardware
K252326	InterSpace GV Hip Spacer	Tecres S.P.A.	2025-08-06	2025-07-25	KWL	Orthopedic	2	Traditional/Hardware
K250124	Viction Disposable Irrigation and suction catheter (VC-IRA0532, VC-IRA0523, VC-IRB0532, VC-IRB0523, VC-IRC0532, VC-IRC0523, VC-IRD0532, VC-IRD0532)	Hangzhou Viction Medical Technology Co.,Ltd	2025-08-06	2025-01-17	GCJ	Gastroenterology, Urology	2	Traditional/Hardware
K251120	Microlife Upper Arm Automatic Digital Blood Pressure Monitor, Model BP Progress (BP3T01-1B)	Microlife Corporation	2025-08-06	2025-04-11	DXN	Cardiovascular	2	Traditional/Hardware
K250934	Respiree Cardio- Respiratory Monitor System	Respiree Pte, Ltd.	2025-08-05	2025-03-28	BZQ	Anesthesiology	2	Traditional/Hardware
K250434	trophon2	Nanosonics	2025-08-05	2025-02-14	OUJ	Radiology	2	Traditional/Hardware
K252141	AltiVate Reverse® Glenoid	Encore Medical, L.P.	2025-08-05	2025-07-08	PHX	Orthopedic	2	Traditional/Hardware
K252113	PRADO_x0099_ Lumbar Interbody Fusion System	Bethesda Medical Devices	2025-08-05	2025-07-07	MAX	Orthopedic	2	Traditional/Hardware
K251411	Chemfort Female Luer Lock Adaptor	Simplivia Healthcare , Ltd.	2025-08-05	2025-05-07	ONB	General Hospital	2	Traditional/Hardware
K251087	Blood Volume Analyzer (200)	Daxor Corporation	2025-08-04	2025-04-09	JWO	Hematology	2	Traditional/Hardware
K250950	CUTIVA_x0099_ Topical Skin Adhesive (RM1700); CUTIVA_x0099_ PLUS Skin Closure System (RM1739)	Okapi Medical, LLC Dba Resivant Medical	2025-08-04	2025-03-28	MPN	General, Plastic Surgery	2	Traditional/Hardware
K251113	iHealth Compare Wireless Blood Pressure Monitor(BP-300C);iHealth Compare Pro Wireless Blood Pressure Monitor(BP-300CV);iHealth Compare S Wireless Blood Pressure Monitor(BP-300V);iHealth Wireless Blood Pressure Monitor(BPX1);iHealth Blood Pressure Monitor(KD-595);iHealth Track Pro Connected Blood Pressure Monitor(KN-550LT);Semi Automatic Blood Pressure Monitor(KD-388N);Arm Blood Pressure Monitor(K…	Andon Health Co, Ltd.	2025-08-04	2025-04-11	DXN	Cardiovascular	2	Traditional/Hardware
K251122	Terragene® Bionova® BT20 Biological Indicator	Terragene	2025-08-04	2025-04-11	FRC	General Hospital	2	Traditional/Hardware
K251762	Quantum Perfusion Centrifugal Blood Pump CP20NG with Integrated Sensors (CP20V-NG)	Spectrum Medical S.R.L.	2025-08-04	2025-06-09	KFM	Cardiovascular	2	Traditional/Hardware
K243462	Diazyme Colorimetric Lithium Assay	Diazyme Laboratories, Inc.	2025-08-01	2024-11-08	NDW	Clinical Toxicology	2	Traditional/Hardware
K243427	QuickSleeper 5	Dentalhitec	2025-08-01	2024-11-05	EGM	Dental	2	Traditional/Hardware
K243458	HydroPICC 4Fr Single Lumen Marked catheter, 130 cm guidewire - Basic Kit (70001301); HydroPICC 4Fr Single Lumen Marked catheter, 70 cm guidewire - Basic Kit (70001302); HydroPICC 4Fr Single Lumen Marked catheter - Maximal Barrier kit (70001304); HydroPICC 5Fr Dual Lumen Marked catheter, 130 cm guidewire - Basic Kit (70002301); HydroPICC 5Fr Dual Lumen Marked catheter, 70 cm guidewire - Basic Kit …	Access Vascular, Inc.	2025-08-01	2024-11-08	LJS	General Hospital	2	Traditional/Hardware
K250508	AK 98 Dialysis Machine (955607)	Vantive US Healthcare, LLC	2025-08-01	2025-02-21	KDI	Gastroenterology, Urology	2	Traditional/Hardware
K243483	Access hsTnI	Beckman Coulter, Inc.	2025-08-01	2024-11-08	MMI	Clinical Chemistry	2	Traditional/Hardware
K243841	Sparta Infusion Set for Insulin	Deka Research and Development	2025-08-01	2024-12-13	FPA	General Hospital	2	Traditional/Hardware
K250315	RONAVIS _x0096_ FX (FX-001)	AIRS, Inc.	2025-08-01	2025-02-04	HTY	Orthopedic	2	Traditional/Hardware
K250495	MINI VP1 (PL67_F); MINI VP1 (PL61_F)	Avizor S.A.	2025-08-01	2025-02-20	LRX	Ophthalmic	2	Traditional/Hardware
K243496	MycoMEIA Aspergillus Assay	Pearl Diagnostics, Inc.	2025-08-01	2024-11-12	NOM	Microbiology	1	Traditional/Hardware
K251652	Strauss Surgical Cystoscopes & Hysteroscopes (STS-2040-302ASA HD-endoscope, STS-2040-302AA HD-endoscope, STS-2040-302BA HD-endoscope, STS-2040-302BSA HD-endoscope, STS-2040-302ESA HD-endoscope, STS-2040-302CA HD-endoscope, STS-2029-302AA HD-endoscope, STS-2029-302BA HD-endoscope, STS-2040-298DSA-RWF-endoscope, STS-2040-298ASA-RWF-endoscope, STS-2040-300GSA-RWF-endoscope, STS-2040-303CA-RWF-endosc…	American Medical Endoscopy, Inc.	2025-08-01	2025-05-29	FAJ	Gastroenterology, Urology	2	Traditional/Hardware
K251252	NOBILCAM IMPAK Disc	Shandong Huge Dental Material Corporation	2025-08-01	2025-04-23	MQC	Unknown	U	Traditional/Hardware
K250541	Self-Forming Magnet (Flexagon Plus OTOLoc)	Gi Windows, Inc.	2025-08-01	2025-02-24	SAH	General, Plastic Surgery	2	Traditional/Hardware
K243448	Equinoxe® Shoulder System	Exactech, Inc.	2025-08-01	2024-11-07	PHX	Orthopedic	2	Traditional/Hardware
K250477	NextAR(TM) Spine	Medacta International S.A.	2025-07-31	2025-02-19	SBF	Neurology	2	Traditional/Hardware
K242728	BeneVision Central Monitoring System	Shenzhen Mindray Bio-Medical Electronics Co., Ltd.	2025-07-31	2024-09-10	MSX	Cardiovascular	2	Traditional/Hardware
K244060	eCO2 3D	Lutronic Corporation	2025-07-31	2024-12-31	ONG	General, Plastic Surgery	2	Traditional/Hardware
K243455	cobas Respiratory 4-flex for use on the cobas 5800/6800/8800 Systems	Roche Molecular Systems, Inc.	2025-07-31	2024-11-07	QOF	Microbiology	2	Traditional/Hardware
K250843	Wearable Breast Pump (Model FS12A); Wearable Breast Pump (Model FS12B)	Shenzhen TPH Technology Co., Ltd.	2025-07-31	2025-03-20	HGX	Obstetrics/Gynecology	2	Traditional/Hardware
K243656	U2 Total Knee System _x0096_ PF+ Patella; USTAR II System_x0096_ PF+ Patella	United Orthopedic Corporation	2025-07-31	2024-11-26	MBH	Orthopedic	2	Traditional/Hardware
K251574	Sleep Watch	Ambulatory Monitoring, Inc.	2025-07-31	2025-05-22	LEL	Neurology	2	Traditional/Hardware
K250724	Intraosseous Infusion Needles	Spectrum Vascular	2025-07-30	2025-03-10	FMI	General Hospital	2	Traditional/Hardware
K251361	Tyber Medical Distal Radius Plating System	Tyber Medical, LLC	2025-07-30	2025-05-01	HRS	Orthopedic	2	Traditional/Hardware
K244007	ArteVu	Cardio Ring Technologies, Inc. Taiwan Branch	2025-07-30	2024-12-26	DXN	Cardiovascular	2	Traditional/Hardware
K252032	T65 (9016E061-)	Tonica Elektronik A/S	2025-07-30	2025-06-30	OBP	Neurology	2	Traditional/Hardware
K251060	CORUS_x0099_ Navigation System-GX	Providence Medical Technology, Inc.	2025-07-30	2025-04-04	OLO	Neurology	2	Traditional/Hardware
K252144	Iconix Speed Anchor; Iconix Speed HA+ Anchor	Riverpoint Medical	2025-07-30	2025-07-08	MBI	Orthopedic	2	Traditional/Hardware
K243534	Micro Catheter	Suzhou Zenith Vascular SciTech Limited	2025-07-30	2024-11-15	KRA	Cardiovascular	2	Traditional/Hardware
K251735	Stabilis SA Cervical Stand-Alone System (Various PNs)	Acuity Surgical Devices, LLC	2025-07-30	2025-06-06	OVE	Orthopedic	2	Traditional/Hardware
K251319	Sterile Nitrile Powder Free Examination Glove Tested for Use with Chemotherapy Drugs and Fentanyl Citrate (Blue); Sterile Nitrile Powder Free Examination Glove Tested for Use with Chemotherapy Drugs and Fentanyl Citrate (Blue) _x0096_ Extended Cuff	Hartalega NGC Sdn. Bhd.	2025-07-30	2025-04-29	LZA	General Hospital	1	Traditional/Hardware
K242855	P-CON (polymacon) Soft (hydrophilic) Contact Lenses (Tinted, Color)	E.O.S Co., Ltd.	2025-07-30	2024-09-20	LPL	Ophthalmic	2	Traditional/Hardware
K241990	SpineSite Endoscope System	Hydrocision, Inc.	2025-07-30	2024-07-08	HRX	Orthopedic	2	Traditional/Hardware
K251706	TENS and EMS Unit	Changsha Anxiang Medical Technology Co., Ltd.	2025-07-30	2025-06-03	NGX	Physical Medicine	2	Traditional/Hardware
K251234	EnSite_x0099_ X EP System	Abbott Medical	2025-07-30	2025-04-22	DQK	Cardiovascular	2	Traditional/Hardware
K250127	TSK Syringe	Tsk Laboratory, Japan	2025-07-30	2025-01-17	QNQ	General Hospital	2	Traditional/Hardware
K251364	Sleepiz One+ (2.5)	Sleepiz AG	2025-07-29	2025-05-01	DRT	Cardiovascular	2	Traditional/Hardware
K250647	SImmetry+ System	Sivantage	2025-07-29	2025-03-04	OUR	Orthopedic	2	Traditional/Hardware
K243407	Forcyte Autograft Harvest Kit	Forcyte Medical, LLC	2025-07-29	2024-11-01	KNW	Gastroenterology, Urology	2	Traditional/Hardware
K250179	Patient Monitor (CX10, CX12, CX15, UX10, UX12, UX15)	Edan Instruments, Inc.	2025-07-29	2025-01-22	MHX	Cardiovascular	2	Traditional/Hardware
K250356	MoMe ARC® Wireless Ambulatory ECG Monitoring and Detection System (32000)	Infobionic, Inc.	2025-07-29	2025-02-07	DSI	Cardiovascular	2	Traditional/Hardware
K251664	Single Use Aspiration Needle (NA-201SX-4021); Single Use Aspiration Needle (NA-201SX-4022)	Olympus Medical Systems Corporation	2025-07-29	2025-05-30	KTI	Ear, Nose, Throat	2	Traditional/Hardware
K251350	BD Plastipak_x0099_ Syringe	Becton, Dickinson and Company	2025-07-29	2025-04-30	FMF	General Hospital	2	Traditional/Hardware
K250442	da Vinci Surgical System, IS5000	Intuitive Surgical, Inc.	2025-07-29	2025-02-14	NAY	Gastroenterology, Urology	2	Traditional/Hardware
K251220	NUVENTUS NV.C_x0099_ Prosthetic Components	Infinitum Eta, Ltd.	2025-07-28	2025-04-21	NHA	Dental	2	Traditional/Hardware
K251640	SIGMA Spectrum Infusion Pump with Master Drug Library	Baxter Healthcare Corporation	2025-07-28	2025-05-29	FRN	General Hospital	2	Traditional/Hardware
K251636	Spectrum IQ Infusion System with Dose IQ Safety Software (3570009)	Baxter Healthcare Corporation	2025-07-28	2025-05-29	FRN	General Hospital	2	Traditional/Hardware
K251187	3 in 1 TENS UNIT (TC1241, TC2241, TS1241)	Changsha Anxiang Medical Technology Co., Ltd.	2025-07-28	2025-04-17	NUH	Neurology	2	Traditional/Hardware
K241183	ISO Abutment	Seum Medi Co., Ltd.	2025-07-28	2024-04-29	NHA	Dental	2	Traditional/Hardware
K243489	Alinity m EBV (09N43-095)	Abbott Molecular, Inc.	2025-07-28	2024-11-12	QLX	Microbiology	2	Traditional/Hardware
K250334	Fusion Craniofacial Implant; Fusion Skull Implant	Kelyniam Global, Inc.	2025-07-25	2025-02-05	GWO	Neurology	2	Traditional/Hardware
K250859	TransForm McCarthy Mitral Annuloplasty Ring (TF)	Genesee Biomedical, Inc.	2025-07-25	2025-03-21	KRH	Cardiovascular	2	Traditional/Hardware
K252215	InbellaMAX System	Inbella Medical , Ltd.	2025-07-25	2025-07-15	GEI	General, Plastic Surgery	2	Traditional/Hardware
K243403	BD Nexiva_x0099_ Closed IV Catheter System	Becton Dickinson Infusion Therapy Systems, Inc.	2025-07-25	2024-10-31	FOZ	General Hospital	2	Traditional/Hardware
K250244	Compression Therapy Device (LGT-2210DS)	Guangzhou Longest Medical Technology Co., Ltd.	2025-07-25	2025-01-27	IRP	Physical Medicine	2	Traditional/Hardware
K251620	A.L.P.S. Proximal Humerus Plating System	Zimmer Biomet	2025-07-25	2025-05-27	HRS	Orthopedic	2	Traditional/Hardware
K250552	Hi-Torque Command 14 ST Guide Wire and Hi-Torque Command 14 MT Guide Wire	Abbott Medical	2025-07-25	2025-02-25	DQX	Cardiovascular	2	Traditional/Hardware
K250989	Stryker and Serf hip devices	Howmedica Osteonics Corp (Dba Stryker Orthopaedics)	2025-07-25	2025-03-31	LPH	Orthopedic	2	Traditional/Hardware
K250232	Vathin® Video Bronchoscope System	Hunan Vathin Medical Instrument Co., Ltd.	2025-07-25	2025-01-27	EOQ	Ear, Nose, Throat	2	Traditional/Hardware
K243244	Heated Breathing Tube	Guangdong Eda Technology Co., Ltd.	2025-07-25	2024-10-11	BZE	Anesthesiology	2	Traditional/Hardware
K251665	Triathlon® Hinge Knee System	Howmedica Osteonics Corp., Dba Stryker Orthopaedics	2025-07-25	2025-05-30	KRO	Orthopedic	2	Traditional/Hardware
K252033	Profoject_x0099_ Disposable Syringe, Profoject_x0099_ Disposable Syringe with Needle	Cmt Health Pte., Ltd.	2025-07-25	2025-06-30	FMF	General Hospital	2	Traditional/Hardware
K251955	Onflex_x0099_ Mesh	Davol Inc., Subsidiary of C. R. Bard, Inc.	2025-07-24	2025-06-25	FTL	General, Plastic Surgery	2	Traditional/Hardware
K243711	Confocal Microprobe Imaging System (BrightP980); Confocal Microprobe Imaging System (BrightP960); Confocal Microprobe Imaging System (BrightP880); Confocal Microprobe Imaging System (BrightP860); Confocal Microprobe Imaging System (BrightP780); Confocal Microprobe Imaging System (BrightP750); Confocal Microprobe Imaging System (BrightP680); Confocal Microprobe Imaging System (BrightP660); Confoca…	Wuxi Hisky Medical Technologies Co., Ltd.	2025-07-24	2024-12-02	OWN	Gastroenterology, Urology	2	Traditional/Hardware
K250284	TSK SELECT_x0099_ Needle	Tsk Laboratory, Japan	2025-07-24	2025-01-31	FMI	General Hospital	2	Traditional/Hardware
K251618	MOTO Partial Knee System Extension	Medacta International S.A.	2025-07-24	2025-05-27	HSX	Orthopedic	2	Traditional/Hardware
K252056	Isolator® Synergy_x0099_ EnCompass Clamp and Guide system (OLH, OSH, GPM100)	AtriCure, Inc.	2025-07-24	2025-07-01	OCL	General, Plastic Surgery	2	Traditional/Hardware
K243392	Infusomat® Space Volumetric Infusion Pump Administration Sets	B. Braun Medical, Inc.	2025-07-24	2024-10-31	FPA	General Hospital	2	Traditional/Hardware
K251297	MIS LYNX Conical Connection Implant System	Dentsply Sirona, Inc.	2025-07-24	2025-04-28	DZE	Dental	2	Traditional/Hardware
K250322	Respond OC Conserving Regulator (130-0800)	Responsive Respiratory	2025-07-24	2025-02-04	NFB	Anesthesiology	2	Traditional/Hardware
K251968	HemosIL Fibrinogen-C; HemosIL Fibrinogen-C XL	Instrumentation Laboratory (IL) Co.	2025-07-24	2025-06-26	KQJ	Hematology	2	Traditional/Hardware
K252010	SPY Laparoscope	Stryker Endoscopy	2025-07-24	2025-06-27	GCJ	Gastroenterology, Urology	2	Traditional/Hardware
K250280	SD TL Implant System	Arum Dentistry Co., Ltd.	2025-07-23	2025-01-31	DZE	Dental	2	Traditional/Hardware
K251265	Resilience Fully Covered Esophageal Stent System	Merit Medical Systems, Inc.	2025-07-23	2025-04-24	ESW	General, Plastic Surgery	2	Traditional/Hardware
K251748	MammoSTAR Biopsy Site Identifier	Carbon Medical Technologies, Inc.	2025-07-23	2025-06-06	NEU	General, Plastic Surgery	2	Traditional/Hardware
K251073	Innovasis Navigation Instruments (Vector G-E Navigation Instruments and the Excella G-E Navigation Instruments)	Innovasis, Inc.	2025-07-23	2025-04-08	OLO	Neurology	2	Traditional/Hardware
K251213	Da Vinci Surgical System (IS5000)	Intuitive Surgical, Inc.	2025-07-23	2025-04-18	NAY	Gastroenterology, Urology	2	Traditional/Hardware
K242615	Intermittent pressure compression system (Compression Pump PT1005A; Leg Compression Cuffs; L-1001S, L-1001L, L-1001XL, L-1001XXL, L-1001XXXL)	Xiamen Taotao Technology Co., Ltd.	2025-07-23	2024-09-03	IRP	Physical Medicine	2	Traditional/Hardware
K251280	DESS® Dental Implants	Terrats Medical SL	2025-07-23	2025-04-24	DZE	Dental	2	Traditional/Hardware
K250590	MAGiC Sweep_x0099_ EP Mapping Catheter	Stereotaxis, Inc.	2025-07-23	2025-02-27	DRF	Cardiovascular	2	Traditional/Hardware
K243415	Granudacyn® Wound Irrigation Solution	P.G.F. Industry Solutions GmbH	2025-07-22	2024-11-01	FRO	Unknown	U	Traditional/Hardware
K243367	Minnesota Medical Technologies Fecal Incontinence Insert (My Miracle)	Minnesota Medical Technologies	2025-07-22	2024-10-30	PBP	Gastroenterology, Urology	2	Traditional/Hardware
K251638	Mobility Scooter (MS160C)	Suzhou Master Machinery Manufacturing Co.,Ltd	2025-07-22	2025-05-29	INI	Physical Medicine	2	Traditional/Hardware
K244018	Disposable Biopsy Needle	Zhejiang Curaway Medical Technology Co., Ltd.	2025-07-22	2024-12-27	KNW	Gastroenterology, Urology	2	Traditional/Hardware
K243566	CardioTag_x0099_	Cardiosense, Inc.	2025-07-22	2024-11-18	DXR	Cardiovascular	2	Traditional/Hardware
K243425	Guided DAS Surgical Kit	Talladium España, SL	2025-07-22	2024-11-04	KCT	General Hospital	2	Traditional/Hardware
K251616	Clear Miracle	Ods Co., Ltd.	2025-07-22	2025-05-27	NXC	Dental	2	Traditional/Hardware
K251310	OTS 25-L (100-5)	Ots Medical , Ltd.	2025-07-22	2025-04-28	MBI	Orthopedic	2	Traditional/Hardware
K251505	VersaCoat Nerve Protector (VTP-44G2); VersaCoat Nerve Protector (VTP-12G1)	Alafair Biosciences	2025-07-22	2025-05-16	JXI	Neurology	2	Traditional/Hardware
K251300	Plastic Surgical Kits	Dentsply Sirona, Inc.	2025-07-22	2025-04-28	KCT	General Hospital	2	Traditional/Hardware
K251255	LymphaTech Mobile 3D Measuring Tool	Lymphatech, Inc.	2025-07-22	2025-04-23	SFG	General, Plastic Surgery	1	Traditional/Hardware
K251564	microINR System	Iline Microsystems, S.L.	2025-07-21	2025-05-22	GJS	Hematology	2	Traditional/Hardware
K250913	TINGSN FINDERS 2 Color Doppler Diagnostic Ultrasound System	Jiangsu Tingsn Technology Co., Ltd.	2025-07-19	2025-03-27	OBJ	Cardiovascular	2	Traditional/Hardware
K231562	ELEC ENGINE (Model: ISE-170L)	Micro-Nx Co., Ltd.	2025-07-18	2023-05-31	EBW	Dental	1	Traditional/Hardware
K251655	VersaCoat Tendon Protector (VTP-44G2); VersaCoat Tendon Protector (VTP-12G1)	Alafair Biosciences	2025-07-18	2025-05-30	OWW	General, Plastic Surgery	2	Traditional/Hardware
K252012	SPY Cystoscope/Hysteroscope	Stryker Endoscopy	2025-07-18	2025-06-27	HIH	Obstetrics/Gynecology	2	Traditional/Hardware
K251906	Z1 Hip System	Zimmer, Inc.	2025-07-18	2025-06-20	LZO	Orthopedic	2	Traditional/Hardware
K251542	InstaFAN	Onepass Medical , Ltd.	2025-07-18	2025-05-20	ODG	Gastroenterology, Urology	2	Traditional/Hardware
K250952	Baby Gorilla®/Gorilla® Plating System	Paragon 28, Inc.	2025-07-18	2025-03-28	HRS	Orthopedic	2	Traditional/Hardware
K243404	HyHub_x0099_ and HyHub_x0099_ Duo Vial Access Devices	Takeda Pharmaceuticals	2025-07-18	2024-11-01	LHI	General Hospital	2	Traditional/Hardware
K251809	Arthrex FiberTak Suture Anchor	Arthrex, Inc.	2025-07-18	2025-06-12	MBI	Orthopedic	2	Traditional/Hardware
K250902	HeartFlow Analysis	HeartFlow, Inc.	2025-07-18	2025-03-26	PJA	Cardiovascular	2	Traditional/Hardware
K251585	Profoject_x0099_ Enteral Feeding Syringe	Cmt Health Pte., Ltd.	2025-07-18	2025-05-23	PNR	Gastroenterology, Urology	2	Traditional/Hardware
K252218	MF SC GEN2 Facial Toning System	Micro Current Technology, Inc.	2025-07-18	2025-07-15	NFO	Neurology	2	Traditional/Hardware
K243775	True Non-Surgical Spinal Decompression System (DRX9000-SL)	Excite Medical of Tampa Bay, LLC	2025-07-18	2024-12-09	ITH	Physical Medicine	2	Traditional/Hardware
K250553	Tomey Cornea/Anterior Segment OCT (CASIA2)	Tomey Corporation	2025-07-18	2025-02-25	OBO	Ophthalmic	2	Traditional/Hardware
K251016	MectaLIF 3D Metal	Medacta International S.A.	2025-07-17	2025-04-02	MAX	Orthopedic	2	Traditional/Hardware
K243324	Masimo O3 Regional Oximeter	Masimo Corporation	2025-07-17	2024-10-23	MUD	Cardiovascular	2	Traditional/Hardware
K243428	e2CoilTM Imaging System for the Siemens MAGNETOM 3.0T MRI Systems with Tim 4G Connector	Dxtx Medical, Inc.	2025-07-17	2024-11-05	MOS	Radiology	2	Traditional/Hardware
K251556	Device 300423 Granules	Geistlich Pharma AG	2025-07-17	2025-05-21	MQV	Orthopedic	2	Traditional/Hardware
K243756	0.014_x0094_ Willow Guidewire	Arbor Endovascular, LLC	2025-07-17	2024-12-06	MOF	Cardiovascular	2	Traditional/Hardware
K243420	HESTIA	Genoray Co., Ltd.	2025-07-17	2024-11-04	MUE	Radiology	2	Traditional/Hardware
K251491	K5 Cart, K5 Mount, K5 Swing	Osstem Implant Company., Ltd. Chair Business	2025-07-17	2025-05-14	EIA	Dental	1	Traditional/Hardware
K242505	Elecsys Cortisol III	Roche Diagnostics	2025-07-17	2024-08-22	JFT	Clinical Chemistry	2	Traditional/Hardware
K251175	VersaWrap Nerve Protector (VTP-2201); VersaWrap Nerve Protector (VTP-1201)	Alafair Biosciences	2025-07-17	2025-04-16	JXI	Neurology	2	Traditional/Hardware
K250751	DualView Catheter	Terumo Corporation	2025-07-17	2025-03-12	DQO	Cardiovascular	2	Traditional/Hardware
K251202	da Vinci Surgical System (IS5000)	Intuitive Surgical, Inc.	2025-07-16	2025-04-18	NAY	Gastroenterology, Urology	2	Traditional/Hardware
K243412	ARCHIMEDES Biodegradable Pancreatic Stent	Q3 Medical USA, LLC (C/O Q3 Medical Devices Ltd.)	2025-07-16	2024-11-01	FGE	Gastroenterology, Urology	2	Traditional/Hardware
K251102	Automatic Blood Pressure Monitor (CH-S691L, CH-B607, CH-B606, CH-S692L, CH-S602, CH-W701L, CH-S693L, CH-B601L, CP-B01, CH-S603)	Cemho Medical Technology (Guangdong) Co., Ltd.	2025-07-16	2025-04-11	DXN	Cardiovascular	2	Traditional/Hardware
K243782	StimTrial Neuromodulation System	Bioventus, LLC	2025-07-16	2024-12-09	GZF	Neurology	2	Traditional/Hardware
K251845	Marigen Wound Extra; Kerecis Silicone; Kerecis Parvus	Kerecis Limited	2025-07-16	2025-06-16	KGN	Unknown	U	Traditional/Hardware
K242237	Jewel Soft Tissue Reinforcement Device (102-6005)	Xiros Limited	2025-07-15	2024-07-30		Unknown		Traditional/Hardware
K251844	Kerecis SurgiBind (50241)	Kerecis Limited	2025-07-15	2025-06-16	OXH	General, Plastic Surgery	2	Traditional/Hardware
K250350	Thrive 2-in-1 Breast Pump (Model P3)	Shenzhen TPH Technology Co., Ltd.	2025-07-15	2025-02-07	HGX	Obstetrics/Gynecology	2	Traditional/Hardware
K251053	Shinetell PlusTM Digital Early Pregnancy Test	Hangzhou AllTest Biotech Co., Ltd.	2025-07-15	2025-04-04	LCX	Clinical Chemistry	2	Traditional/Hardware
K250119	Tempus ECG-Low EF	Tempus AI, Inc.	2025-07-15	2025-01-16	QYE	Cardiovascular	2	Traditional/Hardware
K251045	Disposable Neonatal NIBP Cuff (U1682S-C51N); Disposable Neonatal NIBP Cuff (U1683S-C51N); Disposable Neonatal NIBP Cuff (U1684S-C51N); Disposable Neonatal NIBP Cuff (U1685S-C51N)	Unimed Medical Supplies, Inc.	2025-07-15	2025-04-03	DXQ	Cardiovascular	2	Traditional/Hardware
K242818	IsoSphere	Isoaid, LLC	2025-07-15	2024-09-18	KXK	Radiology	2	Traditional/Hardware
K251488	FLOWRUNNER Aspiration System	Expanse Medical, Inc.	2025-07-14	2025-05-14	QEZ	Cardiovascular	2	Traditional/Hardware
K250504	Leonardo Duster	Ceramoptec GmbH	2025-07-14	2025-02-20	GEX	General, Plastic Surgery	2	Traditional/Hardware
K251132	The Acumed Wrist Fixation System - Plates; The Acumed Wrist Fixation System - Screws	Acumed, LLC	2025-07-14	2025-04-11	HRS	Orthopedic	2	Traditional/Hardware
K251554	Materialise TKA Guide System	Materialise N.V	2025-07-14	2025-05-21	JWH	Orthopedic	2	Traditional/Hardware
K250185	Electronic Sphygmomanometers (ZH-X9, ZH-X12, ZH-X16, ZH-X17, ZH-X18, ZH-X19, ZH-X23, ZH-X24)	Jiangxi Aicare Medical Technology Co., Ltd.	2025-07-14	2025-01-22	DXN	Cardiovascular	2	Traditional/Hardware
K251173	Intense Pulsed Light (IPL) System (T033KQ, T033KD, T033KF, T033MQ, T033MD, T033MF, T055KQ, T055KD, T055KH, T002AQ, T002AD, T002AF, T002BQ, T002BD, T002BF, T050KQ, T050KD, T050KF)	Shenzhen Fansizhe Science And Technology Co., Ltd.	2025-07-14	2025-04-16	OHT	General, Plastic Surgery	2	Traditional/Hardware
K251378	CoolTone	Zimmer Medizinsysteme GmbH	2025-07-14	2025-05-02	NGX	Physical Medicine	2	Traditional/Hardware
K243598	Welch Allyn Connex® 360 (Multiple)	Welch Allyn, Inc.	2025-07-13	2024-11-21		Unknown		Traditional/Hardware
K243199	NightWatch+ US	Livassured BV	2025-07-12	2024-10-01	POS	Neurology	2	Traditional/Hardware
K250820	Disposable Trocars	Sinolinks Medical Innovation, Inc.	2025-07-11	2025-03-18	GCJ	Gastroenterology, Urology	2	Traditional/Hardware
K243274	CDC Human Influenza Virus Real-Time RT-PCR Diagnostic Panel: Influenza A/B Typing Kit (VER 2); Influenza A SubTyping Kit (VER 4); Influenza B Genotyping Kit (VER 1.1 and 2); and Influenza A/H5 Subtyping Kit (VER 4)	Centers For Disease Control and Prevention	2025-07-11	2024-10-16	OZE	Microbiology	2	Traditional/Hardware
K241179	Rhythm Express Remote Cardiac Monitoring System (RX-1 mini)	Vivaquant, Inc.	2025-07-11	2024-04-29	QYX	Cardiovascular	2	Traditional/Hardware
K250772	Medline ReNewal Reprocessed Boston Scientific Dynamic XT Unidirectional Steerable Diagnostic Catheter	Surgical Instrument Service and Savings, Inc.	2025-07-11	2025-03-13	NLH	Cardiovascular	2	Traditional/Hardware
K251472	Inion CPS 1.5/2.0/2.5 Bioabsorbable Fixation System; Inion CPS 1.5 Baby Bioabsorbable Fixation System	Inion OY	2025-07-11	2025-05-13	HBW	Neurology	2	Traditional/Hardware
K251134	RipCord	TriMed, Inc.	2025-07-11	2025-04-11	HTN	Orthopedic	2	Traditional/Hardware
K250034	Natural rubber latex male condom	Shaoguan Regenex Pharmaceuticals Co., Ltd.	2025-07-11	2025-01-07	HIS	Obstetrics/Gynecology	2	Traditional/Hardware
K250156	Choice 2 DC	Bisco, Inc.	2025-07-11	2025-01-21	EMA	Dental	2	Traditional/Hardware
K251155	BD Cathena_x0099_ Safety IV Catheter	Becton Dickinson Infusion Therapy Systems, Inc.	2025-07-11	2025-04-14	FOZ	General Hospital	2	Traditional/Hardware
K251482	AEON_x0099_ Endoscopic Powered Stapler	Lexington Medical, Inc.	2025-07-11	2025-05-14	GAG	General Hospital	2	Traditional/Hardware
K251352	Codonics Safe Labeling System-Point of Care Station (PCS) (SLS-700i and related 610i, 620i, 630i series enabled to retrofit RFID features); Codonics Safe Labeling System-Point of Care Station (PCS) (SLS-1, SLS XXX, Multiple Models Pending Configuration)	Codonics.Incorporated	2025-07-11	2025-04-30	BSZ	Anesthesiology	2	Traditional/Hardware
K251436	Resolve Anterior Cervical Plate System	Pioneer Surgical Technology, Inc.	2025-07-11	2025-05-08	KWQ	Orthopedic	2	Traditional/Hardware
K250762	ULTRASONIC PROBE UM-S20-17S (UM-S20-17S); ULTRASONIC PROBE UM-S20-20R (UM-S20-20R)	Olympus Medical Systems Corporation	2025-07-11	2025-03-13	ITX	Radiology	2	Traditional/Hardware
K251149	AviClear Laser System	Cutera, Inc.	2025-07-11	2025-04-14	GEX	General, Plastic Surgery	2	Traditional/Hardware
K243655	TurbAlign	Spirair, Inc.	2025-07-11	2024-11-26	LYA	Ear, Nose, Throat	1	Traditional/Hardware
K251786	Geistlich Bio-Oss®; Geistlich Bio-Oss Pen®	Geistlich Pharma AG	2025-07-11	2025-06-11	NPM	Dental	2	Traditional/Hardware
K243296	Disposable Biopsy Needle	Carbon (Shenzhen) Medical Device Co., Ltd.	2025-07-11	2024-10-18	KNW	Gastroenterology, Urology	2	Traditional/Hardware
K251470	ResiCem EX	Shofu Dental Corporation	2025-07-11	2025-05-13	EMA	Dental	2	Traditional/Hardware
K250761	KALA Therapy Wand (Model: KALA-03)	Shenzhen Kaiyan Medical Equipment Co., Ltd.	2025-07-11	2025-03-13	OHS	General, Plastic Surgery	2	Traditional/Hardware
K250671	FreeStyle Comfort (AS200 / FreeStyle Comfort)	Caire, Inc.	2025-07-11	2025-03-05	CAW	Anesthesiology	2	Traditional/Hardware
K250266	Ceragem Automatic Thermal Massager (CGM MB-2401)	Ceragem Co., Ltd.	2025-07-11	2025-01-30	JFB	Physical Medicine	2	Traditional/Hardware
K250063	ARENA Star, Galaxy Star	Arum Dentistry Co., Ltd.	2025-07-10	2025-01-10	EIH	Dental	2	Traditional/Hardware
K251885	CAVUX Facet Fixation System (CAVUX FFS) and CORUS-LX Implant	Providence Medical Technology, Inc.	2025-07-10	2025-06-20	MRW	Unknown	U	Traditional/Hardware
K250072	CONDUIT_x0099_ SYNFIX_x0099_ Evolution Secured Spacer System	Avalign Technologies, Inc.	2025-07-10	2025-01-10	OVD	Orthopedic	2	Traditional/Hardware
K244004	Microcurrent Facial Device (CEC101, EE0101, EEI101)	Shenzhen Dachi Communication Co., Ltd.	2025-07-10	2024-12-26	NFO	Neurology	2	Traditional/Hardware
K243252	ZBPro Diagnostic	Zbeats, Inc.	2025-07-10	2024-10-15	DPS	Cardiovascular	2	Traditional/Hardware
K250032	Marquee_x0099_ Disposable Core Biopsy Instrument and Instrument Kit	Bard Peripheral Vascular, Inc.	2025-07-10	2025-01-07	KNW	Gastroenterology, Urology	2	Traditional/Hardware
K251945	TriMed Total Wrist Fusion System (Total Wrist Fusion Plate)	TriMed, Inc.	2025-07-10	2025-06-25	HRS	Orthopedic	2	Traditional/Hardware
K250283	RAP Femoral Venous Cannulae	LivaNova USA, Inc.	2025-07-10	2025-01-31	DWF	Cardiovascular	2	Traditional/Hardware
K251145	Arthrex PushLock Suture Anchors	Arthrex, Inc.	2025-07-10	2025-04-14	MBI	Orthopedic	2	Traditional/Hardware
K250247	panaSIa SI Fusion System	Wenzel Spine, Inc.	2025-07-09	2025-01-27	OUR	Orthopedic	2	Traditional/Hardware
K250505	EZ-FIDUCIALS	Phasor Health, LLC	2025-07-09	2025-02-21	HAW	Neurology	2	Traditional/Hardware
K250108	OptiVu_x0099_ Shoulder	Mr Surgical Solutions, LLC	2025-07-09	2025-01-16	SBF	Neurology	2	Traditional/Hardware
K242562	Monitor B105M; Monitor B125M; Monitor B155M; Monitor B105P; Monitor B125P	Ge Medical Systems Information Technologies, Inc.	2025-07-09	2024-08-28	MHX	Cardiovascular	2	Traditional/Hardware
K243731	HEXIM Implant; Samwon General Abutments	P&A USA	2025-07-09	2024-12-04	DZE	Dental	2	Traditional/Hardware
K251759	Flexiva Pulse Laser Fiber; Flexiva Pulse TracTip Laser Fiber; Flexiva Pulse ID Laser Fiber; Flexiva Pulse ID TracTip Laser Fibers	Boston Scientific Corporation	2025-07-09	2025-06-09	GEX	General, Plastic Surgery	2	Traditional/Hardware
K250193	Nitrile Powder-Free Exam Gloves 2.8, Tested for Use with Chemotherapy Drugs, Opioid Fentanyl Citrate, Simulated Gastric Acid (light blue, dark blue)	Basic Medical Technology, Inc.	2025-07-09	2025-01-23	LZA	General Hospital	1	Traditional/Hardware
K250133	HARBOR Occlusion Device	Nuvascular, Inc.	2025-07-09	2025-01-17	KRD	Cardiovascular	2	Traditional/Hardware
K243500	ARCHITECT iGentamicin	Abbott Laboratories	2025-07-09	2024-11-12	LCD	Clinical Toxicology	2	Traditional/Hardware
K251804	KHEIRON® Spinal Fixation System, including patient specific K-ROD	S.M.A.I.O	2025-07-08	2025-06-12	NKB	Orthopedic	2	Traditional/Hardware
K251741	PathLoc Lumbar Interbody Fusion Cage System	L & K Biomed Co., Ltd.	2025-07-08	2025-06-06	MAX	Orthopedic	2	Traditional/Hardware
K250342	Powder-Free Polychloroprene Examination Glove (Green Color) Tested for Use with Chemotherapy Drugs and Fentanyl	Encompass Industries Sdn. Bhd.	2025-07-08	2025-02-06	LZA	General Hospital	1	Traditional/Hardware
K241525	ExcelsiusXR_x0099_	Globus Medical, Inc.	2025-07-08	2024-05-30	SBF	Neurology	2	Traditional/Hardware
K250065	DENSITY; DENZA; DENSITY Noir	Jeisys Medical Incorporated	2025-07-08	2025-01-10	GEI	General, Plastic Surgery	2	Traditional/Hardware
K240908	Quantum Micro-Cardioplegia Delivery System; Quantum Micro-Cardioplegia Delivery Module (QMCDM)	Spectrum Medical , Ltd.	2025-07-08	2024-04-02	DTR	Cardiovascular	2	Traditional/Hardware
K251761	Anovo Surgical System (Model 6Ne); Anovo Instrument ARM Curved Scissors ; Anovo Instrument ARM Hook Electrode	Momentis Surgical , Ltd.	2025-07-08	2025-06-09	QNM	General, Plastic Surgery	2	Traditional/Hardware
K251447	K-Pack Embrace Active Safety Needle (KNAS-2516RB, KNAS-2525RB)	Terumo Europe N.V.	2025-07-08	2025-05-09	FMI	General Hospital	2	Traditional/Hardware
K251776	EMPOWR Revision Knee_x0099_ (EMPOWR Revision VVC+, e+ Tibial Insert)	Encore Medical, L.P.	2025-07-08	2025-06-10	JWH	Orthopedic	2	Traditional/Hardware
K250695	Single-use Ureteral Access Sheath	Shenzhen HugeMed Medical Technical Development Co., Ltd.	2025-07-08	2025-03-07	FED	Gastroenterology, Urology	2	Traditional/Hardware
K251502	TruLift® Lateral Expandable Spacer & Lateral Buttress Plate System	Life Spine, Inc.	2025-07-07	2025-05-15	MAX	Orthopedic	2	Traditional/Hardware
K250827	aprevo® anterior lumbar interbody fusion device; aprevo® lateral lumbar interbody fusion device; aprevo® anterior lumbar interbody fusion device with interfixation; aprevo® transforaminal lumbar interbody fusion device; aprevo® TLIF-CA Articulating System; aprevo® Cervical ACDF; aprevo® Cervical ACDF-X; aprevo® Cervical ACDF-X No Cams	Carlsmed, Inc.	2025-07-07	2025-03-18	MAX	Orthopedic	2	Traditional/Hardware
K250496	Powder Free Polyurethane Examination Gloves (Green, Blue, Pink, White)	Zibo Shengkun Chemical Industry Co., Ltd.	2025-07-07	2025-02-20	LZA	General Hospital	1	Traditional/Hardware
K250398	Innovita Flu A/B Antigen Rapid Test	Innovita (Tangshan) Biological Technology Co., Ltd.	2025-07-03	2025-02-12	PSZ	Microbiology	2	Traditional/Hardware
K250838	Denudation Pipettes	Guangzhou Pinzhi Medical Device Co., Ltd.	2025-07-03	2025-03-20	MQH	Obstetrics/Gynecology	2	Traditional/Hardware
K250105	Boomerang Valvulotome (BMGVT080); Boomerang Push Valvulotome (BMGPVT125)	Aveera Medical, Inc.	2025-07-03	2025-01-15	MGZ	Cardiovascular	2	Traditional/Hardware
K250286	Rapid2 Magnetic Stimulators (Magstim Rapid2, Magstim Super Rapid2, Magstim Super Rapid2 Plus1)	The Magstim Company Limited	2025-07-03	2025-01-31	QPL	Neurology	2	Traditional/Hardware
K251599	Single-use Ureteral Access Sheath	Hunan Vathin Medical Instrument Co., Ltd.	2025-07-03	2025-05-27	FED	Gastroenterology, Urology	2	Traditional/Hardware
K243123	IPL Treatment Device (MDSQMC-01)	Medusa (Guangxi)Medical Devices Co., Ltd.	2025-07-03	2024-09-30	ONF	General, Plastic Surgery	2	Traditional/Hardware
K251291	Advanix_x0099_ Pancreatic Stent and NaviFlex_x0099_ Rapid Exchange (RX) Pancreatic Delivery System and Pushers	Boston Scientific	2025-07-03	2025-04-25	FGE	Gastroenterology, Urology	2	Traditional/Hardware
K250165	Pastelle	Wontech Co., Ltd.	2025-07-03	2025-01-21	GEX	General, Plastic Surgery	2	Traditional/Hardware
K251054	Hem-o-lok_x0099_ PurplePlus_x0099_ Large Polymer Ligating Clips	Teleflex Medical	2025-07-03	2025-04-04	FZP	General, Plastic Surgery	2	Traditional/Hardware
K251080	IdentiTi II Cervical Interbody System	Alphatec Spine, Inc.	2025-07-03	2025-04-08	ODP	Orthopedic	2	Traditional/Hardware
K251390	MTA vpt	Voco GmbH	2025-07-03	2025-05-05	KIF	Dental	2	Traditional/Hardware
K243826	SMR Reverse HP Shoulder System	Lima Corporate S.P.A.	2025-07-03	2024-12-12	PHX	Orthopedic	2	Traditional/Hardware
K243678	TalisMann Neuromodulation System	Bioventus, LLC	2025-07-03	2024-11-27	GZF	Neurology	2	Traditional/Hardware
K243280	Piezomed Pro (Piezomed Pro module M-PM100 incl. handpiece M-PH350, Piezomed Pro instruments (various tips) and accessories)	W&H Dentalwerk Buermoos GmbH	2025-07-03	2024-10-17	ERL	Ear, Nose, Throat	2	Traditional/Hardware
K250448	Disposable Percutaneous Nephrostomy Dilatation Kit	Shenzhen Trious Medical Technology Co., Ltd.	2025-07-03	2025-02-18	LJE	Unknown	U	Traditional/Hardware
K243220	Onera STS 2 (ONERA STS 2)	Onera B.V.	2025-07-03	2024-10-07	MNR	Anesthesiology	2	Traditional/Hardware
K243255	URIS Long Implant & Abutments	Truabutment, Inc.	2025-07-03	2024-10-15	DZE	Dental	2	Traditional/Hardware
K250524	Mendaera Guidance System	Mendaera, Inc.	2025-07-02	2025-02-21	ITX	Radiology	2	Traditional/Hardware
K251241	EMPOWR Revision Knee_x0099_ (EMPOWR Revision Knee_x0099_ Symmetric TT Cones)	Encore Medical, L.P.	2025-07-02	2025-04-22	JWH	Orthopedic	2	Traditional/Hardware
K251049	SurgiLight 1470 Diode Laser System (Model:Halo)	Micro-Energy Medical Technology Co., Ltd.	2025-07-02	2025-04-03	GEX	General, Plastic Surgery	2	Traditional/Hardware
K250391	Leksell Gamma Knife® (Elekta Esprit); Leksell Gamma Knife® (Icon_x0099_); Leksell Gamma Knife® (Perfexion_x0099_)	Elekta Solutions AB	2025-07-02	2025-02-12	IWB	Radiology	2	Traditional/Hardware
K251490	8 mm Assist Cannula; 12 mm Assist Cannula	Intuitive Surgical, Inc.	2025-07-02	2025-05-14	GCJ	Gastroenterology, Urology	2	Traditional/Hardware
K251031	Fiber Laser Treatment Systems (HS-232,HS-233)	Shanghai Apolo Medical Technology Co., Ltd.	2025-07-02	2025-04-03	ONG	General, Plastic Surgery	2	Traditional/Hardware
K243701	AuroLase® System	Nanospectra Biosciences, Inc.	2025-07-02	2024-11-29	GEX	General, Plastic Surgery	2	Traditional/Hardware
K250415	G0 Blood Pressure Monitoring System (G0)	Aktiia SA	2025-07-02	2025-02-13	DXN	Cardiovascular	2	Traditional/Hardware
K251720	OsteoFlo HydroFiber	SurGenTec, LLC	2025-07-02	2025-06-04	MQV	Orthopedic	2	Traditional/Hardware
K250587	Orthoscan TAU Mini C-Arm	Ziehm-Orthoscan, Inc.	2025-07-02	2025-02-27	OXO	Radiology	2	Traditional/Hardware
K251746	Pure Impact	Sofwave Medical, Ltd.	2025-07-02	2025-06-06	NGX	Physical Medicine	2	Traditional/Hardware
K243468	Compressor Nebulizer (NB-1100); Compressor Nebulizer (NB-1101); Compressor Nebulizer (NB-1102); Compressor Nebulizer (NB-1103)	Joytech Healthcare Co. , Ltd.	2025-07-02	2024-11-08	CAF	Anesthesiology	2	Traditional/Hardware
K250848	Identity Shoulder System	Zimmer, Inc.	2025-07-02	2025-03-20	MBF	Orthopedic	2	Traditional/Hardware
K250779	CS-Pro MED	Curative Sound Therapeutics	2025-07-02	2025-03-14	PZL	General, Plastic Surgery	2	Traditional/Hardware
K243399	Boehringer Laboratories Liver Retractor	Boehringer Laboratories, LLC	2025-07-02	2024-10-31	GCJ	Gastroenterology, Urology	2	Traditional/Hardware
K250279	RC-SwiftPrep	Belport Company, Inc., Gingi-Pak	2025-07-02	2025-01-31	KJJ	Unknown	U	Traditional/Hardware
K250312	Hudson RCI® Comfort Flo Nasal Cannula Premature, Infant; Hudson RCI® Comfort Flo Plus and Soft Plus Cannula Extra Small	Medline Industries, LP	2025-07-02	2025-02-03	BTT	Anesthesiology	2	Traditional/Hardware
K251719	Momentum® Posterior Spinal Fixation System	Ulrich Medical USA, Inc.	2025-07-01	2025-06-04	NKB	Orthopedic	2	Traditional/Hardware
K251212	Dual Lumen 5Fr HydroPICC Catheter (PICC-251CM) (PICC-251CM); Dual Lumen 5Fr HydroPICC Catheter (PICC-252CM) (PICC-252CM)	Access Vascular, Inc.	2025-07-01	2025-04-18	LJS	General Hospital	2	Traditional/Hardware
K250204	Endoscopic Camera System	Shenzhen Sophway Technology Co., Ltd.	2025-07-01	2025-01-24	FET	Gastroenterology, Urology	2	Traditional/Hardware
K251032	MiniMed 780G insulin pump	Medtronic Minimed, Inc.	2025-07-01	2025-04-03	QFG	Clinical Chemistry	2	Traditional/Hardware
K250699	Cure Twist Female 8 Catheter (T8); Cure Twist Female 10 Catheter (T10); Cure Twist Female 12 Catheter (T12); Cure Twist Female 14 Catheter (T14); Cure Twist Female 16 Catheter (T16); Cure Twist Female 8 Catheter Kit with supplies (T8K); Cure Twist Female 10 Catheter Kit with supplies (T10K); Cure Twist Female 12 Catheter Kit with supplies (T12K); Cure Twist Female 14 Catheter Kit with supplies (T…	Convatec	2025-07-01	2025-03-07	EZD	Gastroenterology, Urology	2	Traditional/Hardware
K243690	SonoMSK	Pajunk GmbH Medizintechnologie	2025-07-01	2024-11-29	BSP	Anesthesiology	2	Traditional/Hardware
K251933	SnugFit ASA Extension	Medacta International S.A.	2025-07-01	2025-06-24	MBI	Orthopedic	2	Traditional/Hardware
K250016	droplet® personal lancets	Htl-Strefa S.A	2025-07-01	2025-01-03	QRK	General, Plastic Surgery	2	Traditional/Hardware
K251453	Arthrex iBalance Partial Knee System	Arthrex, Inc.	2025-07-01	2025-05-12	HSX	Orthopedic	2	Traditional/Hardware
K243485	Alinity m CMV	Abbott Molecular, Inc.	2025-07-01	2024-11-08	PAB	Microbiology	2	Traditional/Hardware
K251088	Otsuka Digital Feedback Device	Otsuka America Pharmaceutical, Inc.	2025-06-30	2025-04-09	OZW	General Hospital	2	Traditional/Hardware
K250987	aprevo® posterior/transforaminal lumbar interbody fusion device	Carlsmed, Inc.	2025-06-30	2025-03-31	MAX	Orthopedic	2	Traditional/Hardware
K250022	HeroTracker Sense	Voluntis	2025-06-30	2025-01-03	CAF	Anesthesiology	2	Traditional/Hardware
K250972	Primum Hydrophilic Guiding Catheter	Pendracare	2025-06-29	2025-03-31	DQY	Cardiovascular	2	Traditional/Hardware
K243900	eMotus Respiratory Motion Management System	Empnia, Inc.	2025-06-27	2024-12-19	LHN	Radiology	2	Traditional/Hardware
K251654	BD Insyte_x0099_ Autoguard_x0099_ Shielded IV Catheter, BD Insyte_x0099_ Autoguard_x0099_ BC Shielded IV Catheter and BD Insyte_x0099_ Autoguard_x0099_ BC Pro Shielded IV Catheter	Becton Dickinson Infusion Therapy Systems, Inc.	2025-06-27	2025-05-30	FOZ	General Hospital	2	Traditional/Hardware
K243187	Nisus ONE Negative Pressure Wound Therapy System (OCMPP-100)	Cork Medical	2025-06-27	2024-09-30	OMP	General, Plastic Surgery	2	Traditional/Hardware
K251431	FIX-C PEEK ACIF SA System	Jeil Medical Corporation	2025-06-27	2025-05-08	OVE	Orthopedic	2	Traditional/Hardware
K251660	T3 Pro Implants_x0096_ ZimVie Packaging System	Biomet 3i, LLC	2025-06-27	2025-05-30	DZE	Dental	2	Traditional/Hardware
K242988	Genostis Osteosynthesis System	Genostis AF	2025-06-27	2024-09-26	HRS	Orthopedic	2	Traditional/Hardware
K243190	USTOMED Bone Fixation/Bone Augmentation Systems - PIN	Ustomed Instrumente Ulrich Storz GmbH & Co. KG	2025-06-27	2024-09-30	DZL	Dental	2	Traditional/Hardware
K250585	LumenaTM Ureteral Access Sheath	Cathegenix (Xiamen) Co., Ltd.	2025-06-27	2025-02-27	FED	Gastroenterology, Urology	2	Traditional/Hardware
K243130	Integral Dental Unit	Guangdong Yadeng Medical Apparatus Co., Ltd.,	2025-06-27	2024-09-30	EIA	Dental	1	Traditional/Hardware
K251329	Diode laser device (RF3120-BI)	Risu Medical Technology Co., Ltd.	2025-06-27	2025-04-30	GEX	General, Plastic Surgery	2	Traditional/Hardware
K251116	Luja Coudé	Coloplast Corp.	2025-06-27	2025-04-11	EZD	Gastroenterology, Urology	2	Traditional/Hardware
K243388	Disposable Distal Cap	Micro-Tech (Nanjing) Co., Ltd.	2025-06-27	2024-10-31	FDS	Gastroenterology, Urology	2	Traditional/Hardware
K250828	CPS Locator 3D Plus Delivery Catheter	CenterPoint Systems, LLC	2025-06-27	2025-03-19	DQY	Cardiovascular	2	Traditional/Hardware
K243144	X100/X100HT with Full Field Peripheral Blood Smear (PBS) Application	Scopio Labs , Ltd.	2025-06-27	2024-09-30	JOY	Hematology	2	Traditional/Hardware
K243682	SonoPlex STIM; SonoPlex II	Pajunk GmbH Medizintechnologie	2025-06-27	2024-11-29	BSP	Anesthesiology	2	Traditional/Hardware
K250969	JET BITE; JET BLUE BITE FAST; JET BLUE BITE SUPERFAST	Dent4you AG	2025-06-27	2025-03-31	ELW	Dental	2	Traditional/Hardware
K251210	Ampa One System (AMPA-001)	Neuromodulatory Devices & Applications	2025-06-27	2025-04-18	OBP	Neurology	2	Traditional/Hardware
K243816	Testa TP Pivoting Spacer System	Spine Wave, Inc.	2025-06-27	2024-12-12	MAX	Orthopedic	2	Traditional/Hardware
K243183	RTMsense Respiratory Monitoring System	Rtm Vital Signs, LLC	2025-06-27	2024-09-30	BZQ	Anesthesiology	2	Traditional/Hardware
K251642	Dental CBCT X-ray System	Yian Medical Technology (Haining) Co., Ltd.	2025-06-27	2025-05-29	OAS	Radiology	2	Traditional/Hardware
K250984	Maestro System (REF100)	Moon Surgical	2025-06-27	2025-03-31	QZB	Gastroenterology, Urology	2	Traditional/Hardware
K243077	Affirm 800	Digital Surgery Systems, Inc. (D.B.A True Digital Surgery)	2025-06-27	2024-09-30	IZI	Radiology	2	Traditional/Hardware
K250522	Multi4 System	Multi4 Medical AB	2025-06-27	2025-02-21	FAS	Gastroenterology, Urology	2	Traditional/Hardware
K250610	Easyflow (103-200; 103-300); Easyflow Duo (103-210; 103-310)	Sorin Group Italia S.R.L.	2025-06-27	2025-02-28	DWF	Cardiovascular	2	Traditional/Hardware
K250310	VIKING_x0099_ Fixed Curve Diagnostic Catheter	Boston Scientific Corporation	2025-06-27	2025-02-03	DRF	Cardiovascular	2	Traditional/Hardware
K250548	Arm-type Fully Automatic Digital Blood Pressure Monitors (DBP-6286B, DBP-6186)	Joytech Healthcare Co. , Ltd.	2025-06-26	2025-02-25	DXN	Cardiovascular	2	Traditional/Hardware
K243079	NeuroTrac® MyoPlus Pro (MYO120U)	Verity Medical , Ltd.	2025-06-26	2024-09-30		Unknown		Traditional/Hardware
K251694	safety lancet	Tianjin Huahong Technology Co., Ltd.	2025-06-26	2025-06-02	FMK	General, Plastic Surgery	2	Traditional/Hardware
K250956	HardyDisk AST Gepotidacin 10µg (GEP10)	Hardy Diagnostics	2025-06-26	2025-03-31	JTN	Microbiology	2	Traditional/Hardware
K250519	Lap.Ox_x0099_ Laparoscopic Tissue Oximeter	Vioptix, Inc.	2025-06-26	2025-02-21	MUD	Cardiovascular	2	Traditional/Hardware
K251395	The Rialto_x0099_ SI Fusion System	Medtronic Sofamor Danek USA, Inc.	2025-06-26	2025-05-05	OUR	Orthopedic	2	Traditional/Hardware
K250967	Sherlock	Open Implants, LLC	2025-06-26	2025-03-31	NHA	Dental	2	Traditional/Hardware
K250929	TriMed Ulnar Osteotomy System (Ulnar Osteotomy Compression Plate); TriMed Ulnar Osteotomy System (Hex Cortical Screw 3.2mm); TriMed Ulnar Osteotomy System (Locking Cortical Screw 3.2mm); TriMed Ulnar Osteotomy System (Lag Screw 3.2mm)	TriMed, Inc.	2025-06-26	2025-03-28	HRS	Orthopedic	2	Traditional/Hardware
K243179	Sterilization Pouch and Roll	Yichang Xinxin Paper Products Co., Ltd.	2025-06-26	2024-09-30	FRG	General Hospital	2	Traditional/Hardware
K243175	Disposable Intermittent Catheter (TPU Catheter)	Chengdu Daxan Innovative Medical Tech. Co., Ltd.	2025-06-26	2024-09-30		Unknown		Traditional/Hardware
K242846	Doppler FHR Detector (BF-500D+, BF-560)	Shenzhen Bestman Instrument Co., Ltd.	2025-06-26	2024-09-20	KNG	Obstetrics/Gynecology	2	Traditional/Hardware
K251717	Freedom® Total Knee System _x0096_ Titanium Tibial Base Plate	Maxx Orthopedics, Inc.	2025-06-26	2025-06-04	JWH	Orthopedic	2	Traditional/Hardware
K251632	Optimas MAX System	Inmode , Ltd.	2025-06-26	2025-05-28	GEX	General, Plastic Surgery	2	Traditional/Hardware
K251613	SwissGraft X	Geistlich Pharma AG	2025-06-26	2025-05-27	NPM	Dental	2	Traditional/Hardware
K243275	Equinoxe® Scapula Fracture System	Exactech, Inc.	2025-06-26	2024-10-16	HRS	Orthopedic	2	Traditional/Hardware
K250940	Atmo Gas Capsule System	Atmo Biosciences, Ltd.	2025-06-26	2025-03-28	NYV	Gastroenterology, Urology	2	Traditional/Hardware
K250302	Flexible Partial Resin	Prismatik Dentalcraft, Inc.	2025-06-25	2025-02-03	EBI	Dental	2	Traditional/Hardware
K243184	SAT CenterFlow Molding Balloon Catheter (IN20-00313)	Strait Access Technologies Holdings	2025-06-25	2024-09-30	DQY	Cardiovascular	2	Traditional/Hardware
K251003	X-PAC® LLIF Expandable Lateral Cage System	Expanding Innovations, Inc.	2025-06-25	2025-04-01	MAX	Orthopedic	2	Traditional/Hardware
K251725	ANAX_x0099_ OCT Spinal System	Cg Medtech Co., Ltd.	2025-06-25	2025-06-05	NKG	Orthopedic	2	Traditional/Hardware
K250774	SPROTTE® STANDARD (LUER/ NRFit®) Lumbar Puncture	Pajunk GmbH Medizintechnologie	2025-06-25	2025-03-14	BSP	Anesthesiology	2	Traditional/Hardware
K250966	CurrentBody Skin_x0099_ LED Light Therapy Mask Series 2 (MK-90H)	Shenzhen Kaiyan Medical Equipment Co., Ltd.	2025-06-25	2025-03-31	OHS	General, Plastic Surgery	2	Traditional/Hardware
K243112	Curapuls 670	Enraf-Nonius, B.V.	2025-06-25	2024-09-30	IMJ	Physical Medicine	2	Traditional/Hardware
K250921	CORIOGRAPH Pre-Op Planning and Modeling Services	Blue Belt Technologies, Inc.	2025-06-25	2025-03-27	PBF	Orthopedic	2	Traditional/Hardware
K242845	EGIS Biliary Double Bare Stent (BDB080405)	S&G Biotech, Inc.	2025-06-25	2024-09-20	FGE	Gastroenterology, Urology	2	Traditional/Hardware
K250329	GeniPhys Collymer Self-Assembling Scaffold	Geniphys, Inc.	2025-06-25	2025-02-05	KGN	Unknown	U	Traditional/Hardware
K251611	Optiflow+ Nasal Cannula - Small (OPT942); Optiflow+ Nasal Cannula - Medium (OPT944); Optiflow+ Nasal Cannula - Large (OPT946); Optiflow+ Nasal Cannula Small (MYOPT9SMALL); Optiflow+ Nasal Cannula Medium (MYOPT9MEDIUM); Optiflow+ Nasal Cannula Large (MYOPT9LARGE)	Fisher &Paykel Healthcare , Ltd.	2025-06-25	2025-05-27	BTT	Anesthesiology	2	Traditional/Hardware
K250747	Globe® Pulsed Field System	Kardium, Inc.	2025-06-25	2025-03-12	DQK	Cardiovascular	2	Traditional/Hardware
K251644	ProAM ALIF System	Pro Surgical, Inc.	2025-06-24	2025-05-29	OVD	Orthopedic	2	Traditional/Hardware
K250268	HyperSnap Surgical System (HSS)	Hypervision Surgical	2025-06-24	2025-01-30	SFE	Gastroenterology, Urology	2	Traditional/Hardware
K243009	MIST IC	Imagine Milling Technologies, LLC	2025-06-24	2024-09-26	NHA	Dental	2	Traditional/Hardware
K251648	GPS Advanced; GPS Advanced Cannula	Prosidyan, Inc.	2025-06-24	2025-05-29	FMF	General Hospital	2	Traditional/Hardware
K250326	Quantum Perfusion Centrifugal Blood Pump CP22NG with Integrated Sensors (CP22V-NG)	Spectrum Medical S.R.L.	2025-06-24	2025-02-05	KFM	Cardiovascular	2	Traditional/Hardware
K251358	Bridge Plus Occlusion Balloon (590-002)	Philips Image Guided Therapy Devices	2025-06-24	2025-04-30	MJN	Cardiovascular	2	Traditional/Hardware
K243339	WiTOF	Idmed	2025-06-23	2024-10-25	KOI	Anesthesiology	2	Traditional/Hardware
K251271	TempFIT Temporary Crown and Bridge Resin	Rizhao Huge Biomaterials Company, Ltd.	2025-06-23	2025-04-24	EBG	Dental	2	Traditional/Hardware
K250885	Ceftobiprole BPR 5 µg Disc	Liofilchem, Inc.	2025-06-23	2025-03-25	JTN	Microbiology	2	Traditional/Hardware
K250470	Ear Thermometer (EAR-E101); Ear Thermometer (EAR-E102); Ear Thermometer (EAR-E103)	Shenzhen AOJ Medical Technology Co., Ltd.	2025-06-23	2025-02-18	FLL	General Hospital	2	Traditional/Hardware
K250862	EVIS EXERA III BRONCHOVIDEOSCOPE (OLYMPUS BF-XP190); EVIS EXERA III BRONCHOVIDEOSCOPE (OLYMPUS BF-P190); EVIS EXERA III BRONCHOVIDEOSCOPE (OLYMPUS BF-XT190); BRONCHOVIDEOSCOPE (OLYMPUS BF-H1100); BRONCHOVIDEOSCOPE (OLYMPUS BF-1TH1100)	Olympus Medical Systems Corp.	2025-06-23	2025-03-21	EOQ	Ear, Nose, Throat	2	Traditional/Hardware
K250143	Digital Prism Correction Feature (DPCF)	Apple, Inc.	2025-06-23	2025-01-17	SCW	Ophthalmic	1	Traditional/Hardware
K251560	FUBUKI XF-R Neurovascular Long Sheath	Asahi Intecc Co., Ltd.	2025-06-20	2025-05-21	QJP	Cardiovascular	2	Traditional/Hardware
K243062	BD Intelliport System; BD Intelliport Reader (516230); BD Intelliport Sensor (516229); BD Intelliport Gateway (516232); BD Intelliport Mount (516233); BD Intelliport Charger (516231)	Becton Dickinson	2025-06-20	2024-09-27	PHC	General Hospital	2	Traditional/Hardware
K243120	HybridAPC probe	Erbe Elektromedizin GmbH	2025-06-20	2024-09-30	GEI	General, Plastic Surgery	2	Traditional/Hardware
K243978	LED Facial Mask	Shenzhen Sunsred Technology Co.,Ltd	2025-06-20	2024-12-23	OHS	General, Plastic Surgery	2	Traditional/Hardware
K250880	LED LIGHT MASK (A093)	Foshan Guangyu Weilai Medical Equipment Co., Ltd.	2025-06-20	2025-03-24	OHS	General, Plastic Surgery	2	Traditional/Hardware
K250151	Us2.ca	Eko.Ai Pte Ltd. D/B/A Us2.Ai	2025-06-20	2025-01-21	SDJ	Cardiovascular	2	Traditional/Hardware
K243000	Reusable Temperature Probe (T1306, T2306, T3306, T4306); Disposable Temperature Probe (T5106, T6106)	Shenzhen Medke Technology Co., Ltd.	2025-06-20	2024-09-26	FLL	General Hospital	2	Traditional/Hardware
K243589	PAL Sterilization Case	Microaire Surgical Instruments, LLC	2025-06-20	2024-11-20	KCT	General Hospital	2	Traditional/Hardware
K250583	AdheResp Smart Breath-actuated Mesh Nebulizer	Hcmed Innovations Co., Ltd.	2025-06-20	2025-02-27	CAF	Anesthesiology	2	Traditional/Hardware
K242964	Celsi Warmer	Hadleigh Health Technologies	2025-06-20	2024-09-26	DWJ	Cardiovascular	2	Traditional/Hardware
K243053	Navient Image Guided Navigation System (ENT) (955-NC-NC)	Claronav	2025-06-20	2024-09-27	PGW	Neurology	2	Traditional/Hardware
K250037	Incompass Total Ankle System	Wright Medical Technology, Inc. (Stryker)	2025-06-20	2025-01-08	HSN	Orthopedic	2	Traditional/Hardware
K251567	NovoSorb BTM	Polynovo Biomaterials Pty, Ltd.	2025-06-20	2025-05-22	QSZ	Unknown	U	Traditional/Hardware
K251240	Branchor X Balloon Guide Catheter	Asahi Intecc Co., Ltd.	2025-06-20	2025-04-22	QJP	Cardiovascular	2	Traditional/Hardware
K242911	Medconn Glycated Hemoglobin Test system	Shanghai Medconn Medical Technology Co., Ltd.	2025-06-20	2024-09-24	PDJ	Clinical Chemistry	2	Traditional/Hardware
K250566	EsCem RMGI	Spident Co., Ltd.	2025-06-20	2025-02-26	EMA	Dental	2	Traditional/Hardware
K251114	FloPatch FP120	Flosonics Medical	2025-06-20	2025-04-11	DPW	Cardiovascular	2	Traditional/Hardware
K250968	PathPresenter Clinical Viewer	Pathpresenter Corporation	2025-06-20	2025-03-31	QKQ	Pathology	2	Traditional/Hardware
K242985	CollOvine_x0099_ Wound Dressing	Ovigenex, LLC	2025-06-20	2024-09-26	KGN	Unknown	U	Traditional/Hardware
K243168	Alinity i Rubella IgG	Abbott Laboratories	2025-06-20	2024-09-30	LFX	Microbiology	2	Traditional/Hardware
K250877	TMINI Miniature Robotic System	THINK Surgical, Inc.	2025-06-20	2025-03-24	OLO	Neurology	2	Traditional/Hardware
K242981	Atellica IM Thyroglobulin (Tg)	Siemens Healthcare Diagnostics, Inc.	2025-06-20	2024-09-26	MSW	Immunology	2	Traditional/Hardware
K251258	MC2_x0099_ Two-Stage Venous Cannula; MC2X_x0099_ Three-Stage Venous Cannula	Medtronic, Inc.	2025-06-20	2025-04-23	DWF	Cardiovascular	2	Traditional/Hardware
K250732	Disposable Endoscopy Valve Set	Yangzhou Fartley Medical Instrument Technology Co., Ltd.	2025-06-20	2025-03-11	ODC	Gastroenterology, Urology	2	Traditional/Hardware
K251224	Restrata Soft Tissue Reinforcement (STR)	Acera Surgical, Inc.	2025-06-20	2025-04-21	OXF	General, Plastic Surgery	2	Traditional/Hardware
K250515	EpiMonitor	Empatica S.R.L.	2025-06-19	2025-02-21	POS	Neurology	2	Traditional/Hardware
K251235	Electrosurgical Pads	Baisheng Medical Co., Ltd.	2025-06-19	2025-04-22	GEI	General, Plastic Surgery	2	Traditional/Hardware
K242944	Leone Orthodontic Implant TAD (Temporary Anchorage Device)	Leone S.P.A.	2025-06-19	2024-09-25	OAT	Dental	2	Traditional/Hardware
K251253	PowerPort_x0099_ isp Implantable Port; PowerPort_x0099_ Slim Implantable Port; PowerPort_x0099_ M.R.I. _x0099_ Implantable Port; PowerPort_x0099_ M.R.I._x0099_ isp Implantable Port	Bard Access Systems, Inc.	2025-06-18	2025-04-23	LJT	General Hospital	2	Traditional/Hardware
K243366	DRX9000C-SL Cervical Spinal Decompression System	Excite Medical of Tampa Bay, LLC	2025-06-18	2024-10-28	ITH	Physical Medicine	2	Traditional/Hardware
K243039	Ureteral Stents (AF-D series)	Alton (Shanghai) Medical Instruments Co., Ltd.	2025-06-18	2024-09-27	FAD	Gastroenterology, Urology	2	Traditional/Hardware
K250908	Virata Spinal Fixation System	SeaSpine Orthopedics Corporation	2025-06-18	2025-03-26	NKB	Orthopedic	2	Traditional/Hardware
K242933	SPINEART Navigation Instrument System	Spineart SA	2025-06-18	2024-09-25	OLO	Neurology	2	Traditional/Hardware
K243102	Mobility Scooter (JT10)	Jiangxi Jiangte Electric Vehicle Co., Ltd.	2025-06-18	2024-09-30	INI	Physical Medicine	2	Traditional/Hardware
K251296	The Acumed Wrist Fixation System	Acumed, LLC	2025-06-18	2025-04-25	HRS	Orthopedic	2	Traditional/Hardware
K250872	Bioline Dental Implant System	Bioline Dental Implant Systems, Ltd.	2025-06-18	2025-03-24	DZE	Dental	2	Traditional/Hardware
K242922	Extracorporeal Shock Wave Lithotripter (U200)	Shenzhen Wikkon Precision Technologies Co., Ltd.	2025-06-18	2024-09-24	LNS	Gastroenterology, Urology	2	Traditional/Hardware
K250845	Curiteva Porous PEEK Standalone ALIF System	Curiteva, Inc.	2025-06-18	2025-03-20	OVD	Orthopedic	2	Traditional/Hardware
K251530	CONMED Argo Knotless® Anchor	Conmed Corporation	2025-06-18	2025-05-19	MBI	Orthopedic	2	Traditional/Hardware
K250082	Procedure mask/Surgical mask/Face mask	Winner Medical Co., Ltd.	2025-06-18	2025-01-13	FXX	General, Plastic Surgery	2	Traditional/Hardware
K251634	LZI Fentanyl III Enzyme Immunoassay	Lin-Zhi International, Inc.	2025-06-18	2025-05-29	DJG	Clinical Toxicology	2	Traditional/Hardware
K243583	F&P Nova Nasal Mask	Fisher & Paykel Healthcare Limited	2025-06-18	2024-11-20	BZD	Anesthesiology	2	Traditional/Hardware
K250492	FlexiGo 3D Delivery Catheter	CenterPoint Systems, LLC	2025-06-18	2025-02-20	DQY	Cardiovascular	2	Traditional/Hardware
K242224	Happy Health Home Sleep Test	Happy Health, Inc.	2025-06-18	2024-07-29	MNR	Anesthesiology	2	Traditional/Hardware
K243014	EyeQ nanoECP	Eyeq, Inc.	2025-06-18	2024-09-27	HQF	Ophthalmic	2	Traditional/Hardware
K242894	SanAgile_x0099_ Ultrasonic Surgery Advanced Portable Controller (SA10); SanAgile_x0099_ Ultrasonic Surgery Advanced Dissector (SASD14); SanAgile_x0099_ Ultrasonic Surgery Advanced Dissector (SASD23); SanAgile_x0099_ Ultrasonic Surgery Advanced Dissector (SASD36); SanAgile_x0099_ Ultrasonic Surgery Advanced Dissector (SASD45)	Shanghai Saints Sages Surgical Co., Ltd.	2025-06-18	2024-09-23	LFL	Unknown	U	Traditional/Hardware
DEN240066	COAPTIUM Connect with TISSIUM LIGHT	Tissium SA	2025-06-17	2024-11-21	SFD	Neurology	2	Traditional/Hardware
K250997	Integrity_x0099_ Implant	Anika Therapeutics, Inc.	2025-06-17	2025-04-01	OWX	General, Plastic Surgery	2	Traditional/Hardware
K250219	Dorado_x0099_ PTA Balloon Dilatation Catheter	Bard Peripheral Vascular, Inc.	2025-06-17	2025-01-24	DQY	Cardiovascular	2	Traditional/Hardware
DEN240038	Oxiplex®	Fziomed, Inc.	2025-06-17	2024-07-22	QVL	Orthopedic	2	Traditional/Hardware
K243133	Nitrile Powder Free Examination Gloves with Low Dermatitis Potential, Tested for Use with Chemotherapy Drugs, Fentanyl Citrate and Gastric Acid	Kl-Kepong Rubber Products Sdn. Bhd.	2025-06-17	2024-09-30	LZA	General Hospital	1	Traditional/Hardware
K243003	VitalSigns 1-Lead Holter (VSH101)	VitalSigns Technology Co., Ltd.	2025-06-17	2024-09-26	DXH	Cardiovascular	2	Traditional/Hardware
K243618	EasiSlush® Sodium Chloride Solution for Sterile Slush Preparation (BTLE-1250)	Bridge TO Life	2025-06-17	2024-11-22	KDN	Gastroenterology, Urology	2	Traditional/Hardware
K243561	Nano-Check Influenza+COVID-19 Dual Test	Nano-Ditech Corporation	2025-06-17	2024-11-18	SCA	Microbiology	2	Traditional/Hardware
K251617	X-PAC® TLIF Expandable Posterior Cage System; X-PAC® LLIF Expandable Lateral Cage System	Expanding Innovations, Inc.	2025-06-16	2025-05-27	MAX	Orthopedic	2	Traditional/Hardware
K243872	BD Veritor System for SARS-CoV-2	Becton, Dickinson and Company	2025-06-16	2024-12-17	QVF	Microbiology	2	Traditional/Hardware
K242978	Geo Abutment	Geomedi Co,., Ltd.	2025-06-16	2024-09-26	NHA	Dental	2	Traditional/Hardware
K243011	Silicone Urethral Catheter (Silicone Urethral Catheter)	Guangdong Ecan Medical Co., Ltd.	2025-06-16	2024-09-26	EZL	Gastroenterology, Urology	2	Traditional/Hardware
K250900	EvoEndo Single-Use Endoscopy System	EvoEndo, Inc.	2025-06-16	2025-03-25	FDS	Gastroenterology, Urology	2	Traditional/Hardware
K242870	Access hsTnI	Beckman Coulter, Inc.	2025-06-16	2024-09-23	MMI	Clinical Chemistry	2	Traditional/Hardware
K240795	Withings ECG App	Withings	2025-06-15	2024-03-22	QDA	Cardiovascular	2	Traditional/Hardware
K242863	Bioptimal Bipolar Pacing Catheter	Bioptimal International Pte. , Ltd.	2025-06-15	2024-09-20	LDF	Cardiovascular	2	Traditional/Hardware
K243237	2008T HD SYS. CDX BLUESTAR (191124); 2008T HD SYS. CDX W/bibag BLUESTAR (191126); 2008T HD SYS. W/O CDX BLUESTAR (191128); 2008T HD SYS. W/O CDX W/bibag BLUESTAR (191130)	Fresenius Medical Care Renal Therapies Group, LLC	2025-06-13	2024-10-10	KDI	Gastroenterology, Urology	2	Traditional/Hardware
K243638	MV Flow Aspiration Pump (MVFLOWPMP01)	Microvention	2025-06-13	2024-11-25	JCX	General, Plastic Surgery	2	Traditional/Hardware
K251485	Excipio LV Prime Thrombectomy Device	Contego Medical, Inc.	2025-06-13	2025-05-14	QEW	Cardiovascular	2	Traditional/Hardware
K250469	Accuro® 3S Needle Guide Kit	Rivanna Medical, Inc.	2025-06-13	2025-02-18	ITX	Radiology	2	Traditional/Hardware
K250075	Medtronic Stedi Extra Support Guidewire	Medtronic, Inc.	2025-06-13	2025-01-10	DQX	Cardiovascular	2	Traditional/Hardware
K244017	FUJIFILM Endoscope Model EB-710P; FUJIFILM Processor EP-8000	Fujifilm Corporation	2025-06-13	2024-12-27	EOQ	Ear, Nose, Throat	2	Traditional/Hardware
K242852	ALM Tube I.D. 6.0, O.D. 8.2 (520843), ALM Tube I.D. 7.0, O.D. 9.7 (520845), ALM Tube I.D. 7.5, O.D. 10.3 (520846), ALM Tube I.D. 8.0, O.D. 11.0 (520847)	Inomed Medizintechnik GmbH	2025-06-13	2024-09-20	ETN	Ear, Nose, Throat	2	Traditional/Hardware
K250251	Eleganz Fusion Screw System (Fusion Screw System)	Dev4	2025-06-13	2025-01-28	HWC	Orthopedic	2	Traditional/Hardware
K243729	Prismira	Lumos Labs, Inc.	2025-06-13	2024-12-03	QFT	Obstetrics/Gynecology	2	Traditional/Hardware
K251189	Aventus Thrombectomy System	Inquis Medical	2025-06-13	2025-04-17	QEW	Cardiovascular	2	Traditional/Hardware
K251166	Mfinity Femoral System	Medacta International S.A.	2025-06-13	2025-04-15	MEH	Orthopedic	2	Traditional/Hardware
K250759	3 in 1 TENS UNIT	Changsha Anxiang Medical Technology Co., Ltd.	2025-06-13	2025-03-13	NGX	Physical Medicine	2	Traditional/Hardware
K250674	Vessel Sealer Curved (480522)	Intuitive Surgical, Inc.	2025-06-13	2025-03-06	NAY	Gastroenterology, Urology	2	Traditional/Hardware
K250273	BinaxNOW COVID-19 Ag Card	Abbott Diagnostics Scarborough, Inc.	2025-06-13	2025-01-30	QVF	Microbiology	2	Traditional/Hardware
K243973	FIX-L PEEK PLIF and T-PLIF System	Jeil Medical Corporation	2025-06-12	2024-12-23	MAX	Orthopedic	2	Traditional/Hardware
K251154	RIVA Posterior Fixation System; RIVA Posterior Fixation System Navigation Instruments	Ht Medical D.B.A. Xenix Medical	2025-06-12	2025-04-14	NKB	Orthopedic	2	Traditional/Hardware
K251279	Disposable Cytology Brush BC-202D/203D Series	Olympus Medical Systems Corporation	2025-06-12	2025-04-24	BTG	Ear, Nose, Throat	2	Traditional/Hardware
K243683	Deka Bluebeam	El.En S.P.A.	2025-06-12	2024-11-29	GEX	General, Plastic Surgery	2	Traditional/Hardware
DEN240032	APO-Easy Genotyping kit	Firalis SA	2025-06-12	2024-06-21	SFC	Immunology	2	Traditional/Hardware
K250782	Fractional CO2 Laser Machine	Zhengzhou PZ Laser Slim Technology Co., Ltd.	2025-06-12	2025-03-14	GEX	General, Plastic Surgery	2	Traditional/Hardware
K242872	iDart Lyme IgM ImmunoBlot Kit	Id-Fish Technology, Inc.	2025-06-12	2024-09-23	LSR	Microbiology	2	Traditional/Hardware
K250826	Multi M Series	Dmax Co., Ltd.	2025-06-12	2025-03-18	EIH	Dental	2	Traditional/Hardware
K251459	OneLIF_x0099_ Interbody Fusion System	Novapproach Spine, LLC	2025-06-12	2025-05-12	OVD	Orthopedic	2	Traditional/Hardware
K251557	Bard® Mesh; Bard® Mesh Pre-Shaped	Davol, Inc.	2025-06-12	2025-05-21	FTL	General, Plastic Surgery	2	Traditional/Hardware
K250789	Thermo Scientific Oxoid Aztreonam/Avibactam Disc (30/20 µg) AZA50	Thermo Fisher Scientific (Oxoid Ltd.)	2025-06-12	2025-03-14	JTN	Microbiology	2	Traditional/Hardware
K243608	TRIGEN Stable Lock Nut & Washer	Smith & Nephew, Inc.	2025-06-12	2024-11-22	JDS	Orthopedic	2	Traditional/Hardware
K250936	Q-Switched Nd:YAG Laser (SHE-LSP101-1)	Beijing Sano Laser S&T Development Co.,Ltd	2025-06-12	2025-03-28	GEX	General, Plastic Surgery	2	Traditional/Hardware
K251193	Grafton_x0099_ DBM; Grafton Plus_x0099_ DBM Paste; Magnifuse_x0099_ Bone Graft	Medtronic Sofamor Danek, Inc.	2025-06-12	2025-04-17	MQV	Orthopedic	2	Traditional/Hardware
K251209	Medical Monitor (32HS710S)	Lg Electronics.Inc	2025-06-12	2025-04-18	GCJ	Gastroenterology, Urology	2	Traditional/Hardware
K242865	Synicem Hip Spacer; Synicem Knee Spacer; Synicem Shoulder Spacer	Biocomposites, Ltd.	2025-06-12	2024-09-20	KWL	Orthopedic	2	Traditional/Hardware
K242801	MICOR 700 System (N/A); MICOR 700 drive (FG-50631); MICOR 700 extractor (FG-50621); MICOR 700 vitrector (FG-51185)	Carl Zeiss Meditec Cataract Technology, Inc.	2025-06-11	2024-09-17	HQC	Ophthalmic	2	Traditional/Hardware
K250787	Liberant Thrombectomy System	Medtronic, Ireland	2025-06-11	2025-03-14	QEW	Cardiovascular	2	Traditional/Hardware
K250584	Rezum System	Boston Scientific Corporation	2025-06-11	2025-02-27	KNS	Gastroenterology, Urology	2	Traditional/Hardware
K250269	Ambu® aScope_x0099_ 5 Cysto HD (Standard Deflection); Ambu® aScope_x0099_ 5 Cysto HD (Reverse Deflection)	Ambu A/S	2025-06-11	2025-01-30	FAJ	Gastroenterology, Urology	2	Traditional/Hardware
K251499	Frova Intubating Introducer (C-CAE-14.0-70-FII); Frova Intubating Introducer (C-CAE-14.0-70-FI); Frova Intubating Introducer (C-CAE-14.0-70-FIC); Frova Intubating Introducer (C-CAE-14.0-70-FIC-SPOPS)	William Cook Europe Aps	2025-06-11	2025-05-15	BTR	Anesthesiology	2	Traditional/Hardware
K240852	da Vinci X Surgical System (IS4200); da Vinci Xi Surgical System (IS4000)	Intuitive Surgical, Inc.	2025-06-11	2024-03-28	NAY	Gastroenterology, Urology	2	Traditional/Hardware
K243482	Self-Forming Magnet (Flexagon)	Gi Windows, Inc.	2025-06-11	2024-11-08	SAH	General, Plastic Surgery	2	Traditional/Hardware
K250710	Injectable Root Canal Bioceramic Sealer (nRoot SP)	Enpuno Co., Ltd.	2025-06-11	2025-03-10	KIF	Dental	2	Traditional/Hardware
K243512	FUJIFILM Endoscope Model EG-840N; FUJIFILM Endoscope Model EG-840T; FUJIFILM Endoscope Model EG-840TP	Fujifilm Corporation	2025-06-10	2024-11-12	FDS	Gastroenterology, Urology	2	Traditional/Hardware
K250735	Dental Barrier and Sleeves	Fomed Industries, Inc.	2025-06-10	2025-03-11	PEM	General, Plastic Surgery	2	Traditional/Hardware
K242996	EndyMed PRO MAX	Endymed Medical, Ltd.	2025-06-10	2024-09-26	GEI	General, Plastic Surgery	2	Traditional/Hardware
K250768	Elecsys Anti-SARS-CoV-2	Roche Diagnostics	2025-06-10	2025-03-13	QVP	Microbiology	2	Traditional/Hardware
K243956	TG-980P CO2 Sensor Kit (TG-980P); TG-980P1 CO2 Sensor Kit (TG-980P1)	Nihon Kohden Corporation	2025-06-10	2024-12-23	CCK	Anesthesiology	2	Traditional/Hardware
K242921	5300600-5301000 Rota-Trach Disposable Standard Tracheostomy Tube, Cuffed, sizes 6.0-10.0mm; 5310600-5311000 Rota-Trach Disposable Standard Tracheostomy Tube, Cuffed, Fenestrated, sizes 6.0-10.0mm; 5400600-5401000 Rota-Trach Disposable Standard Tracheostomy Tube, Uncuff, sizes 6.0-10.0mm; 5410500-5411000 Rota-Trach Disposable Standard Tracheostomy Tube, Uncuff, Fenestrated, sizes 6.0-10.0mm	Vitaltec Corporation	2025-06-10	2024-09-24	BTO	Anesthesiology	2	Traditional/Hardware
K250830	LED Light Therapy Mask (G15, G15P, G15K, G11P, G11, G10, G13, G14, G17, VISO, PRANA, Chin2Chest, BBL-FACEMASK)	Shenzhen Sungrow Led Technology Co., Ltd.	2025-06-09	2025-03-19	OHS	General, Plastic Surgery	2	Traditional/Hardware
K251500	MallyaG Injection Pen Adapter (MallyaG)	Biocorp Production	2025-06-09	2025-05-15	QOG	General Hospital	2	Traditional/Hardware
K251093	Bonvadis®	Oneness Biotech Co., Ltd.	2025-06-09	2025-04-10	FRO	Unknown	U	Traditional/Hardware
K250465	CO2 Laser Machine (Lume)	Nanjing Bestview Laser S&T Co., Ltd.	2025-06-09	2025-02-18	GEX	General, Plastic Surgery	2	Traditional/Hardware
K250746	Magnetic Surgical System	Levita Magnetics International Corp	2025-06-07	2025-03-12	PNL	General, Plastic Surgery	2	Traditional/Hardware
K242759	Geister K-Rex rongeurs	Geister Medizin Technik GmbH	2025-06-06	2024-09-12	HAE	Neurology	2	Traditional/Hardware
K251131	Annex® 2 Adjacent Level System	Spine Wave, Inc.	2025-06-06	2025-04-11	NKB	Orthopedic	2	Traditional/Hardware
K250591	Anovo Surgical System (6Ne)	Momentis Surgical , Ltd.	2025-06-06	2025-02-27	QNM	General, Plastic Surgery	2	Traditional/Hardware
K250321	GCI Sterilization Wrappers	George Courey, Inc.	2025-06-06	2025-02-04	FRG	General Hospital	2	Traditional/Hardware
K251042	Light Therapy System (M500, L6)	Guangzhou Ahead Intelligent Technology Co., Ltd.	2025-06-06	2025-04-03	OHS	General, Plastic Surgery	2	Traditional/Hardware
K251450	Baby Nasal Aspirator (BN002); Baby Nasal Aspirator (BN006); Baby Nasal Aspirator (BN007); Baby Nasal Aspirator (BN008); Baby Nasal Aspirator (BN009)	Shenzhen Desida Technology Co., Ltd.	2025-06-06	2025-05-09	BTA	General, Plastic Surgery	2	Traditional/Hardware
K243694	Nitrile Powder Free Examination Glove with Tremella Fuciformis Extract, Tested for Use with Chemotherapy Drugs and Fentanyl Citrate - Blue	Mah Sing Healthcare Sdn. Bhd.	2025-06-06	2024-11-29	LZA	General Hospital	1	Traditional/Hardware
K250109	TYBR Collagen Gel	Tybr Health	2025-06-06	2025-01-16	OWY	General, Plastic Surgery	2	Traditional/Hardware
K251525	SI-TECHNOLOGY® SI-DESIS® X_x0099_ Sacroiliac Joint Fusion System	Si-Technology, LLC	2025-06-06	2025-05-19	OUR	Orthopedic	2	Traditional/Hardware
K242907	DELPHI System	Cns Medical Co., Ltd.	2025-06-06	2024-09-24	GEI	General, Plastic Surgery	2	Traditional/Hardware
K242431	Omnia Medical PsiF DNA_x0099_ System	Omnia Medical, LLC	2025-06-06	2024-08-16	OUR	Orthopedic	2	Traditional/Hardware
K240983	Discovery Pico; Discovery Pico Plus; Discovery Pico Derm	Quanta System Spa	2025-06-06	2024-04-10	GEX	General, Plastic Surgery	2	Traditional/Hardware
K242774	SpydrBlade Flex Instrument (PRD-RG1-001)	Creo Medical, Ltd.	2025-06-06	2024-09-13	KNS	Gastroenterology, Urology	2	Traditional/Hardware
K250891	Cure Catheter Insertion Kit (K1); Cure Catheter Insertion Kit (K2); Cure Catheter Insertion Kit (K2-90); Cure Catheter Insertion Kit (K3); Cure Hydrophilic Catheter Kit (HM12UK); Cure Hydrophilic Catheter Kit (HM14UK); Cure Hydrophilic Catheter Kit (HM16UK); Cure Pocket Catheter Kit (M14UK); Cure Catheter Closed System Kit (CS8); Cure Catheter Closed System Kit (CS10); Cure Catheter Closed System…	Convatec Limited	2025-06-06	2025-03-25	FCM	Gastroenterology, Urology	2	Traditional/Hardware
K243994	Steam Sterilizer (2545D)	Ningbo Ican Machines Co., Ltd.	2025-06-06	2024-12-26	FLE	General Hospital	2	Traditional/Hardware
K243456	ONVOY_x0099_ Acetabular System	Globus Medical, Inc.	2025-06-06	2024-11-07	LPH	Orthopedic	2	Traditional/Hardware
K243550	KARL STORZ Flexible Video-Uretero-Renoscope (FLEX XC)	Karl Storz SE & CO. KG	2025-06-06	2024-11-15	FGB	Gastroenterology, Urology	2	Traditional/Hardware
K251452	Celerity 5 HP Biological Indicator (LCB052); Celerity 5 HP Challenge Pack (LCB059); Celerity 20 HP Biological Indicator (LCB044); Celerity 20 HP Challenge Pack (LCB045)	Steris	2025-06-06	2025-05-09	FRC	General Hospital	2	Traditional/Hardware
K250722	Nd: YAG Laser Therapy System (QN-1)	Hebei JT Medical Co., Ltd.	2025-06-06	2025-03-10	GEX	General, Plastic Surgery	2	Traditional/Hardware
K251283	Once-Fil Flow	Mediclus Co., Ltd.	2025-06-06	2025-04-25	EBF	Dental	2	Traditional/Hardware
K242737	Empatica Health Monitoring Platform; EmbracePlus; Empatica Care; Care Portal	Empatica S.R.L.	2025-06-06	2024-09-11	MWI	Cardiovascular	2	Traditional/Hardware
K243002	MBA Biotech Implant System	MBA Biotech Co., Ltd.	2025-06-06	2024-09-26	DZE	Dental	2	Traditional/Hardware
K243639	Portare System (FA-001)	Grumpy Innovation, Inc.	2025-06-05	2024-11-25	EOB	Ear, Nose, Throat	2	Traditional/Hardware
K242704	Synchrony (20-3000)	Synapse Biomedical, Inc.	2025-06-05	2024-09-09	GZI	Neurology	2	Traditional/Hardware
K242736	Portable Oxygen Concentrator (Spirit-3)	Jiangsu Yuyue Medical Equipment& Supply Co., Ltd.	2025-06-05	2024-09-11	CAW	Anesthesiology	2	Traditional/Hardware
K250701	Evis Exera III Duodenovideoscope Olympus TJF-Q190V (TJF-Q190V)	Olympus Medical Systems Corp.	2025-06-05	2025-03-07		Unknown		Traditional/Hardware
K250545	Medline ReNewal Reprocessed Biosense Webster SOUNDSTAR eco Diagnostic Ultrasound Catheter (8F, 8FG, 10F, 10FG)	Surgical Instrument Service and Savings, Inc.	2025-06-05	2025-02-25	OWQ	Cardiovascular	2	Traditional/Hardware
K242464	Stealth_x0099_ Spine Clamps; ModuLeX_x0099_ Shank Mounts	Medtronic Navigation, Inc.	2025-06-05	2024-08-19	OLO	Neurology	2	Traditional/Hardware
K242744	Trinity EVO Acetabular Shell	Corin U.S.A. Limited	2025-06-05	2024-09-11	LPH	Orthopedic	2	Traditional/Hardware
K250616	Clave_x0099_ Neutral-Displacement Needlefree Connectors	Icu Medical, Inc.	2025-06-05	2025-02-28	FPA	General Hospital	2	Traditional/Hardware
K242750	Central Station	Nihon Kohden Digital Health Solutions, LLC	2025-06-05	2024-09-12	MSX	Cardiovascular	2	Traditional/Hardware
K250749	PhysCade System	Physcade, Inc.	2025-06-04	2025-03-12	DQK	Cardiovascular	2	Traditional/Hardware
K251216	0184 CO2 Sampling line; 0184T CO2 Sampling line; 0139 CO2 Sampling line; 0182 CO2 Sampling line	Barbaras Development, Inc.	2025-06-04	2025-04-18	CCK	Anesthesiology	2	Traditional/Hardware
K243843	Tendon Protect (50242)	Kerecis Limited	2025-06-04	2024-12-13	OWY	General, Plastic Surgery	2	Traditional/Hardware
K242712	LubriZenzs	Sk Zen, LLC	2025-06-04	2024-09-09	NUC	Obstetrics/Gynecology	2	Traditional/Hardware
K243499	NG-Test® CTX-M MULTI	Ng Biotech	2025-06-04	2024-11-12	PTJ	Microbiology	2	Traditional/Hardware
K250961	Blood collection tube holders	Promisemed Hangzhou Meditech Co., Ltd.	2025-06-04	2025-03-31	JKA	Clinical Chemistry	2	Traditional/Hardware
K241433	EVE Synergy (EVE-20M)	Weero Co., Ltd.	2025-06-04	2024-05-21	IPF	Physical Medicine	2	Traditional/Hardware
K250804	ID LIGHT CURE SYSTEM	Id Korea Co., Ltd.	2025-06-04	2025-03-17	EBD	Dental	2	Traditional/Hardware
K243368	Montblanc Plate System	Medifield Medical Co., Ltd.	2025-06-04	2024-10-30	HRS	Orthopedic	2	Traditional/Hardware
K251433	Surgify Halo (54.085.SHD.H1); Surgify Halo (54.140.SHD.H1); Surgify Halo (54.070.NVG.H1); Surgify Halo (54.125.NVG.H1); Surgify Halo (54.000.SEE.H1); Surgify Halo (40.070.NVG.H1); Surgify Halo (40.125.NVG.H1); Surgify Halo (40.000.SEE.H1)	Surgify Medical OY	2025-06-04	2025-05-08	HBE	Neurology	2	Traditional/Hardware
K250259	TeleRehab Aermos Cardiopulmonary Rehabilitation	The ScottCare Corporation	2025-06-04	2025-01-28	DRG	Cardiovascular	2	Traditional/Hardware
K250118	Disposable Balloon Catheter B5-2C	Olympus Medical Systems Corporation	2025-06-04	2025-01-16	EOQ	Ear, Nose, Throat	2	Traditional/Hardware
K240788	Ultrasound Stimulator	Jkh Health Co., Ltd.	2025-06-04	2024-03-22	IMI	Physical Medicine	2	Traditional/Hardware
K250879	Paradigm System	Proprio, Inc.	2025-06-04	2025-03-24	OLO	Neurology	2	Traditional/Hardware
K251035	DISINTEK_x0099_ PA Test Strips	Serim Research	2025-06-03	2025-04-03	JOJ	General Hospital	2	Traditional/Hardware
K250529	Globe Introducer (601-01001)	Kardium, Inc.	2025-06-03	2025-02-24	DRA	Cardiovascular	2	Traditional/Hardware
K242897	Partial Flex	Clemde SA DE CV	2025-06-03	2024-09-23	EBI	Dental	2	Traditional/Hardware
K243948	Raptor Aspiration Catheter; Balt Aspiration Tubing Set	Balt USA, LLC	2025-06-03	2024-12-23	NRY	Cardiovascular	2	Traditional/Hardware
K250001	Patriot SI Implant System	Spinal Simplicity, LLC	2025-06-03	2025-01-02	OUR	Orthopedic	2	Traditional/Hardware
K243796	GLOVEONE_x0099_ Powder-Free Nitrile Examination Gloves _x0096_ Non-sterile [Tested for use with Chemotherapy Drugs and Fentanyl]	Glove One, LLC	2025-06-03	2024-12-10	LZA	General Hospital	1	Traditional/Hardware
K243205	EVAC	Phasor Health, LLC	2025-06-03	2024-10-01	JXG	Neurology	2	Traditional/Hardware
K250682	BD Nexiva_x0099_ Diffusics_x0099_ Closed IV Catheter System and BD Nexiva_x0099_ Diffusics_x0099_ Closed IV Catheter System with BD MaxZero_x0099_ Needle-free Connector	Becton Dickinson Infusion Therapy Systems, Inc.	2025-06-03	2025-03-06	FOZ	General Hospital	2	Traditional/Hardware
K243382	RZ Resectoscope System	Rz Medizintechnik GmbH	2025-06-03	2024-10-31	HIH	Obstetrics/Gynecology	2	Traditional/Hardware
K250657	gi2000 Electrosurgical Generator	Cintron Medical Corporation	2025-06-03	2025-03-05	GEI	General, Plastic Surgery	2	Traditional/Hardware
K251127	PENTAX Medical Video Processor (EPK-i8020c)	Pentax of America, Inc.	2025-06-03	2025-04-11	PEA	Gastroenterology, Urology	2	Traditional/Hardware
K250598	Endoform Reconstructive Template - PLGA	Aroa Biosurgery , Ltd.	2025-06-03	2025-02-28	FTM	General, Plastic Surgery	2	Traditional/Hardware
K250452	CoralWell_x0099_ Single-use Ureteral Access Sheath (NS-0835B, NS-0840B, NS-0845B, NS-0855B, NS-0935B, NS-0940B, NS-0945B, NS-0955B, NS-1035B, NS-1040B, NS-1045B, NS-1055B, NS-1135B, NS-1140B, NS-1145B, NS-1155B, NS-1235B, NS-1240B, NS-1245B, NS-1255B, NS-1335B, NS-1340B, NS-1345B, NS-1355B, NS-1435B, NS-1440B, NS-1445B, NS-1455B)	MacroLux Medical Technology Co., Ltd.	2025-06-02	2025-02-18	FED	Gastroenterology, Urology	2	Traditional/Hardware
K251335	Tera Lumbar Interbody Fusion System (Various PNs)	Acuity Surgical Devices, LLC	2025-06-02	2025-04-30	MAX	Orthopedic	2	Traditional/Hardware
K250844	PULLUP®; PULLUP® CLIP; BT LOOP®; PULLUP® TEX CLIP; RIGIDLOOP_x0099_ T; RIGIDLOOP_x0099_ Clip; RIGIDLOOP_x0099_ BTB; RIGIDLOOP_x0099_ Suture Loop	Science & Bio Materials (S.B.M.) Sas	2025-06-02	2025-03-20	MBI	Orthopedic	2	Traditional/Hardware
K250410	GORE® Tri-Lobe Balloon Catheter	W.L. Gore & Associates, Inc.	2025-06-02	2025-02-13	DQY	Cardiovascular	2	Traditional/Hardware
K251376	LimFlow ARC	LimFlow, Inc.	2025-05-31	2025-05-02	PDU	Cardiovascular	2	Traditional/Hardware
K241313	OHC COVID-19 Antigen Self Test	Osang, LLC	2025-05-30	2024-05-09	QYT	Microbiology	2	Traditional/Hardware
K250368	Wearable Breast Pump (Model S21)	Shenzhen TPH Technology Co., Ltd.	2025-05-30	2025-02-10	HGX	Obstetrics/Gynecology	2	Traditional/Hardware
K251238	Vasoview Hemopro 3 Endoscopic Vessel Harvesting System (VH-6000); Vasoview Hemopro 3 Endoscopic Vessel Harvesting System with Vasoshield (VH-6001); Vasoview Hemopro 3 Power Supply (VH-6010)	Maquet Cardiovascular, LLC	2025-05-30	2025-04-22	GEI	General, Plastic Surgery	2	Traditional/Hardware
K243530	Dynamic TiBase	Talladium España, SL	2025-05-30	2024-11-14	NHA	Dental	2	Traditional/Hardware
K250078	Informed Vital Core Application (IVC App) (v2.0.0.2.0.0)	Mindset Medical, Inc.	2025-05-30	2025-01-13	QME	Cardiovascular	2	Traditional/Hardware
K243654	DentalJect	Vapocoolshot, Inc.	2025-05-30	2024-11-26	MLY	Unknown	U	Traditional/Hardware
K242640	FertiCult Flushing medium; FertiCult Flushing medium with phenol red and gentamicin	Fertipro NV	2025-05-30	2024-09-03	MQL	Obstetrics/Gynecology	2	Traditional/Hardware
K250637	VCFix Spinal System	Amber Implants	2025-05-30	2025-03-03	NDN	Orthopedic	2	Traditional/Hardware
K242751	ARIX Pectus Bar System	Jeil Medical Corporation	2025-05-30	2024-09-12	HRS	Orthopedic	2	Traditional/Hardware
K251063	TekBrace Solo Soft Tissue Reinforcement Device	Theramicro	2025-05-30	2025-04-04	QUW	General, Plastic Surgery	2	Traditional/Hardware
K250150	VANGUARD Blood cardioplegia Systems (Vanguard 4:1 Blood cardioplegia set); VANGUARD Blood cardioplegia Systems (Vanguard 4:1 Blood cardioplegia set with shunt); VANGUARD Blood cardioplegia Systems (Vanguard 4:1 Blood Cardioplegia Set Mini)	Sorin Group Italia S.R.L.	2025-05-30	2025-01-21	DTR	Cardiovascular	2	Traditional/Hardware
K243522	ViVi® Toga Premium	Thi Total Healthcare Innovation GmbH	2025-05-30	2024-11-14	FYA	General, Plastic Surgery	2	Traditional/Hardware
K250317	EsFlow PLUS	Spident Co., Ltd.	2025-05-30	2025-02-04	EBF	Dental	2	Traditional/Hardware
K250957	Disposable Biopsy Forceps (FB-211D); Disposable Biopsy Forceps (FB-221D); Disposable Biopsy Forceps (FB-231D); Disposable Biopsy Forceps (FB-241D)	Olympus Medical Systems Corporation	2025-05-30	2025-03-31	EOQ	Ear, Nose, Throat	2	Traditional/Hardware
K242725	Youha electric breast pumps (The INs, The INs Gen2, The INs NEXT, and P3) and BEBEBAO electric breast pump (P1s)	Ningbo Youhe Electrical Appliance Technology Co., Ltd.	2025-05-30	2024-09-10	HGX	Obstetrics/Gynecology	2	Traditional/Hardware
K251383	Prestige Coil System (Prestige Packing Line Extension)	Balt USA, LLC	2025-05-30	2025-05-02	KRD	Cardiovascular	2	Traditional/Hardware
K242635	Endoscopic Distal Attachment (AF-D series)	Alton (Shanghai) Medical Instruments Co., Ltd.	2025-05-30	2024-09-03	FDS	Gastroenterology, Urology	2	Traditional/Hardware
K243010	Fluidshield * 3 Fog-Free Surgical Mask with Wraparound Anti-Glare Visor (28804); Fluidshield * 3 Surgical Mask with SO SOFT* Lining (48208); Fluidshield * 3 Fog-Free Surgical Mask with SO SOFT* Lining (48207); Fluidshield * 3 Fog-Free Surgical Mask with SO SOFT* Lining, with Visor (48237); Fluidshield* 3 Fog-Free Surgical Mask with SO SOFT* Lining, Anti-Glare WrapAround Visor (48247); Fluidshield…	Owens & Minor (O&M) Halyard, Inc.	2025-05-30	2024-09-26	FXX	General, Plastic Surgery	2	Traditional/Hardware
K243505	5008X Hemodialysis System	Fresenius Medical Care Renal Therapies Group, LLC	2025-05-30	2024-11-12	KDI	Gastroenterology, Urology	2	Traditional/Hardware
K242830	LensHooke X3 PRO Semen Quality Analyzer; LensHooke X3 PRO SE Semen Quality Analyzer	Bonraybio Co., Ltd.	2025-05-30	2024-09-19	POV	Hematology	2	Traditional/Hardware
K250581	KALA Red Light Face Mask (KALA-01)	Shenzhen Kaiyan Medical Equipment Co., Ltd.	2025-05-30	2025-02-27	OHS	General, Plastic Surgery	2	Traditional/Hardware
K250365	Motif Aura Glow breast pump (Model Motif Aura Glow)	Shenzhen TPH Technology Co., Ltd.	2025-05-30	2025-02-10	HGX	Obstetrics/Gynecology	2	Traditional/Hardware
K242926	XBody Go USA, XBody Pro USA	Xbody Hungary Kft.	2025-05-30	2024-09-24	NGX	Physical Medicine	2	Traditional/Hardware
K250606	Dental Barrier and Sleeves	Yueying Medical Instruments (Langfang) Co., Ltd.	2025-05-29	2025-02-28	PEM	General, Plastic Surgery	2	Traditional/Hardware
K243309	27G x 1/2 TW K-Pack Surshield Needle (KN-S2713RBT)	Terumo Europe N.V.	2025-05-29	2024-10-21	FMI	General Hospital	2	Traditional/Hardware
K243497	Portable Video Processor (EA101), Flexible Bronchoscope BS41H-12EU, BS41H-12US, BS46H-17EU, BS50H-20EU, BS46H-17US, BS50H-20US, BS53H-22EU, BS53H-22US, BS55H-24EU, BS55H-24US, BS59H-28EU, BS59H-28US	Shanghai AnQing Medical Instrument Co., Ltd.	2025-05-29	2024-11-12	EOQ	Ear, Nose, Throat	2	Traditional/Hardware
DEN240048	Spur Peripheral Retrievable Stent System	Reflow Medical, Inc.	2025-05-29	2024-09-20	SEU	Cardiovascular	2	Traditional/Hardware
K250215	Baha 7 Sound Processor; Baha Fitting Software 7 (P2121898); Baha Smart App (iOS) (P1646054); Baha Smart App (Android) (P1646035); Baha SoundBand	Cochlear	2025-05-29	2025-01-24	LXB	Ear, Nose, Throat	2	Traditional/Hardware
K243856	TENS AND EMS (TENS and Muscle Stimulator) ( Model AS8012C,AS8016,AS8019,AS9020E,AS9026)	Shenzhen Astec Technology Co., Ltd.	2025-05-29	2024-12-16	NUH	Neurology	2	Traditional/Hardware
K243480	SuturePatch Tissue Reinforcement	Arthrex, Inc.	2025-05-29	2024-11-08	OWX	General, Plastic Surgery	2	Traditional/Hardware
K243484	PM2+ System and SmartPICC Stylet	Piccolo Medical, Inc.	2025-05-29	2024-11-08	LJS	General Hospital	2	Traditional/Hardware
K251315	Anatase Spine Surgery Navigation System and Remex Spine Surgery Navigation System II	Remex Medical Corp.	2025-05-29	2025-04-29	OLO	Neurology	2	Traditional/Hardware
K243372	BiliWrap	Gerium Medical, Ltd.	2025-05-29	2024-10-30	LBI	General Hospital	2	Traditional/Hardware
K250757	Radius VSM and Accessories	Masimo Corporation	2025-05-29	2025-03-12	MHX	Cardiovascular	2	Traditional/Hardware
K251340	ProSeal_x0099_ Bag Spike with Additive Port (423370ST, 423370)	Epic Medical Pte. , Ltd.	2025-05-29	2025-04-30	ONB	General Hospital	2	Traditional/Hardware
K243469	SIGNEX	Osteonic Co., Ltd.	2025-05-29	2024-11-08	HRS	Orthopedic	2	Traditional/Hardware
K250048	NEUROMARK System (NMK00301)	Neurent Medical , Ltd.	2025-05-29	2025-01-10	GEI	General, Plastic Surgery	2	Traditional/Hardware
K251325	VersaCross Connect_x0099_ Transseptal Dilator	Baylis Medical Company, Inc.	2025-05-29	2025-04-29	DRE	Cardiovascular	2	Traditional/Hardware
K250307	Visualase V2 MRI-guided Laser Ablation System (9736422)	Medtronic Navigation	2025-05-29	2025-02-03	ONO	General, Plastic Surgery	2	Traditional/Hardware
K251344	OptiMap_x0099_ System	Boston Scientific Corporation	2025-05-28	2025-04-30	DQK	Cardiovascular	2	Traditional/Hardware
K242793	Insighters_x0099_ Single-use Bronchoscope/Insight Bimodel-Integral iS-B12A 4.6/2.0; Insighters_x0099_ Single-use Bronchoscope/Insight Bimodel-Integral iS-B22A 5.5 /2.6; Insighters_x0099_ Single-use Bronchoscope/Insight Bimodel-Integral iS-B26A 6.0/3.0; Insighters_x0099_ Insight Workstation iS-PF1.	Shenzhen Insighters Medical Technology Co., Ltd.	2025-05-28	2024-09-16	EOQ	Ear, Nose, Throat	2	Traditional/Hardware
K243949	OsteoFlo HydroFiber	SurGenTec, LLC	2025-05-28	2024-12-23	MQV	Orthopedic	2	Traditional/Hardware
K240950	Disposable Prophy Angle	Pacific Care Limited	2025-05-28	2024-04-08	EGS	Dental	1	Traditional/Hardware
K243047	Zoom 7X Catheter; Zoom Aspiration Tubing; Zoom POD Aspiration Tubing	Imperative Care, Inc.	2025-05-28	2024-09-27	NRY	Cardiovascular	2	Traditional/Hardware
K242699	Flexible Ureteroscope (U-Scope)(2.8/1.2) (OMI161-2F28-CH12-US); Flexible Ureteroscope (U-Scope)(2.5/1.2) (OMI161-2F25-CH12-US); Images Systems (Camera-Controlled Unit) (OMI01M12)	Opcom Medical, Inc.	2025-05-28	2024-09-09	FGB	Gastroenterology, Urology	2	Traditional/Hardware
K243716	Zionic Pro Max (Radiofrequency)	Termosalud S.L.	2025-05-28	2024-12-02	PBX	General, Plastic Surgery	2	Traditional/Hardware
K242752	MRidium 3870 MRI Infusion Pump System (3870)	Iradimed Corporation	2025-05-28	2024-09-12	FRN	General Hospital	2	Traditional/Hardware
K251578	BEAUTIFIL II	Shofu Dental Corporation	2025-05-27	2025-05-22	EBF	Dental	2	Traditional/Hardware
K242611	Integral Dental Units	Mipont Medical Equipment Co., Ltd.	2025-05-27	2024-09-03	EIA	Dental	1	Traditional/Hardware
K242820	Puritan PurSafe Plus Collection and Transport System	Puritan Medical Products, LLC	2025-05-27	2024-09-18	QBD	Microbiology	2	Traditional/Hardware
K251309	OSSIOfiber® Suture Anchor	OSSIO , Ltd.	2025-05-27	2025-04-28	MAI	Orthopedic	2	Traditional/Hardware
K250614	Neodent Implant System - Custom Abutments	Jjgc Indústria E Comércia DE Materiais Dentários S.A.	2025-05-27	2025-02-28	NHA	Dental	2	Traditional/Hardware
K242604	Helios+ UV-C System	Preventamed Technologies, Inc. Dba Surfacide Manufacturing	2025-05-27	2024-08-30	QXJ	General Hospital	2	Traditional/Hardware
K243777	Rennou_x0099_ Varnish (3% / Spearmint); Rennou_x0099_ Varnish (3% / Strawberry); Rennou_x0099_ Varnish (3% / Cherry); Rennou_x0099_ Varnish (3% / Bubble Gum)	Theodent, LLC	2025-05-27	2024-12-09	LBH	Dental	2	Traditional/Hardware
K242841	Disposable RF Electrode (RFDE-5/RFDE-10/RFDE-15/RFDE-20)	Abbott Medical	2025-05-27	2024-09-19	GXI	Neurology	2	Traditional/Hardware
K250435	Dexter L6 System	Distalmotion SA	2025-05-27	2025-02-14	SDD	General, Plastic Surgery	2	Traditional/Hardware
K250573	Single Use Cannula V PR-V223Q/V414Q/V416Q/V418Q/V420Q/V427Q/V434Q/V435Q; Single Use 2-Lumen Cannula V PR-V614M	Olympus Medical Systems Corp.	2025-05-27	2025-02-26	ODD	Gastroenterology, Urology	2	Traditional/Hardware
K242575	Stereotaxic Guiding Surgical Devices, NaoTrac S	Brain Navi Biotechnology Co., Ltd.	2025-05-23	2024-08-29	HAW	Neurology	2	Traditional/Hardware
K250549	Optilite® Freelite Mx Kappa Free Kit; Optilite® Freelite Mx Lambda Free Kit	The Binding Site Group , Ltd.	2025-05-23	2025-02-25	DFH	Immunology	2	Traditional/Hardware
K244047	Navi_x0099_ Needle-free Blood Collection Device (VNC20500FG, VNC22500FG, VNC24500FG)	Venocare, Inc.	2025-05-23	2024-12-31	JKA	Clinical Chemistry	2	Traditional/Hardware
K250239	NeuroMatch	LVIS Corporation	2025-05-23	2025-01-27	OLX	Neurology	2	Traditional/Hardware
K243023	WiZARD 520 Full Face Mask	Wellell, Inc.	2025-05-23	2024-09-27	BZD	Anesthesiology	2	Traditional/Hardware
K243474	MagnetOs MIS	Kuros Biosciences B.V	2025-05-23	2024-11-08	MQV	Orthopedic	2	Traditional/Hardware
K251044	93 NeuFlex Catheter	Piraeus Medical	2025-05-23	2025-04-03	QJP	Cardiovascular	2	Traditional/Hardware
K250544	Knotilus+ Biocomposite Knotless Anchor	Stryker Endoscopy	2025-05-23	2025-02-25	MAI	Orthopedic	2	Traditional/Hardware
K250361	SmartAppGuidedTM MicroCurrent Face-Lift Pen 6 in 1	Geske Beauty Tech GmbH	2025-05-23	2025-02-10	NFO	Neurology	2	Traditional/Hardware
K250446	Frida_x0099_ Anterior Cervical Plate System	Spineup, Inc.	2025-05-23	2025-02-14	KWQ	Orthopedic	2	Traditional/Hardware
K243261	FUJIFILM Endoscope Model EC-860P/M; FUJIFILM Endoscope Model EC-860P/L; FUJIFILM Endoscope Model EC-860S/L	Fujifilm Corporation	2025-05-23	2024-10-15	FDF	Gastroenterology, Urology	2	Traditional/Hardware
K242545	RadiForce MX317W-PA	Eizo Corporation	2025-05-23	2024-08-27	PZZ	Pathology	2	Traditional/Hardware
K251211	ViewFlex_x0099_ Xtra ICE Catheter; ViewFlex_x0099_ Eco Reprocessed ICE Catheter; Advisor_x0099_ HD Grid Mapping Catheter, Sensor Enabled_x0099_; Advisor_x0099_ HD Grid X Mapping Catheter, Sensor Enabled_x0099_; Agilis_x0099_ NxT Steerable Introducer; Agilis_x0099_ NxT Steerable Introducer Dual-Reach_x0099_	Abbott Medical	2025-05-23	2025-04-18	OBJ	Cardiovascular	2	Traditional/Hardware
K250384	IPL400	El Global Trade, Ltd.	2025-05-23	2025-02-11	OHT	General, Plastic Surgery	2	Traditional/Hardware
K250778	Sil-Flow	Dsi Dental Solutions, Ltd.	2025-05-23	2025-03-14	EBF	Dental	2	Traditional/Hardware
K251052	Trivicta® Hip Stem	Ortho Development Corp.	2025-05-22	2025-04-03	MEH	Orthopedic	2	Traditional/Hardware
K250532	Solawave 2-in-1 Skincare Mini (Model: 61043)	Shenzhen Kaiyan Medical Equipment Co., Ltd.	2025-05-22	2025-02-24	OHS	General, Plastic Surgery	2	Traditional/Hardware
K242684	Harioculture TL-16 Time-lapse Incubator	Hua Yue Medical Technology Co., Ltd.	2025-05-22	2024-09-06	MQG	Obstetrics/Gynecology	2	Traditional/Hardware
K251493	Skin Clinic Freeze Point for Warts and Skin Tags	Cryoconcepts Lp,	2025-05-22	2025-05-15	GEH	General, Plastic Surgery	2	Traditional/Hardware
K250639	DESS Dental Smart Solutions	Terrats Medical SL	2025-05-22	2025-03-03	NHA	Dental	2	Traditional/Hardware
K250897	Koala Intrauterine Pressure Catheter (IPC-5000E)	Clinical Innovations, LLC	2025-05-22	2025-03-25	HFN	Obstetrics/Gynecology	2	Traditional/Hardware
K250878	YUWELL® Infrared Ear Thermometer (YHT100); YUWELL® Infrared Ear Thermometer (YHT107)	Jiangsu Yuyue Medical Equipment& Supply Co., Ltd.	2025-05-22	2025-03-24	FLL	General Hospital	2	Traditional/Hardware
K250630	Nitrile Powder-Free Exam Gloves with Hyaluronic Acid, and tested for Use with Chemotherapy Drugs, Opioid Fentanyl Citrate, Simulated Gastric Acid and Xylazine in Fentanyl Citrate	Basic Medical Technology, Inc.	2025-05-22	2025-03-03	LZA	General Hospital	1	Traditional/Hardware
K250980	Physica System (Physica CR Porous Femoral components)	Lima Corporate S.P.A.	2025-05-22	2025-03-31	MBH	Orthopedic	2	Traditional/Hardware
K250910	Optilume® High Pressure Urological Balloon Dilation Catheter	Urotronic, Inc.	2025-05-22	2025-03-26	EZN	Gastroenterology, Urology	2	Traditional/Hardware
K250935	TriMed Fifth Metatarsal System (Fifth Metatarsal Plate); TriMed Fifth Metatarsal System (Fifth Metatarsal Screw)	TriMed, Inc.	2025-05-22	2025-03-28	HRS	Orthopedic	2	Traditional/Hardware
K250920	Arthrex Spine Compression FT Screw	Arthrex, Inc.	2025-05-22	2025-03-27	MRW	Unknown	U	Traditional/Hardware
K242586	ArgoCap (200.52)	Ovesco Endoscopy AG	2025-05-22	2024-08-30	OCX	Gastroenterology, Urology	2	Traditional/Hardware
DEN240035	ConcizuTrace_x0099_ ELISA	Randox Laboratories, Ltd.	2025-05-22	2024-07-01	SES	Hematology	2	Traditional/Hardware
K251239	GrandioSO Unlimited	Voco GmbH	2025-05-21	2025-04-22	EBF	Dental	2	Traditional/Hardware
K250493	MotiliCap GI Monitoring System	Anx Robotica Corporation	2025-05-21	2025-02-20	NYV	Gastroenterology, Urology	2	Traditional/Hardware
K251230	The Alma Hybrid Laser System	Alma Lasers, Inc.	2025-05-21	2025-04-21	GEX	General, Plastic Surgery	2	Traditional/Hardware
K242637	MEM Clear Aligner System	Mem Dental Technology Co., Ltd.	2025-05-21	2024-09-03	NXC	Dental	2	Traditional/Hardware
K250798	Control-IQ+ technology	Tandem Diabetes Care, Inc.	2025-05-21	2025-03-14	QJI	Clinical Chemistry	2	Traditional/Hardware
K242527	The Karma® Fixation System	Spinal Elements, Inc.	2025-05-21	2024-08-26	MRW	Unknown	U	Traditional/Hardware
K243116	FlareHawk Interbody Fusion System	Integrity Implants Inc. Dba Accelus	2025-05-21	2024-09-30	MAX	Orthopedic	2	Traditional/Hardware
K243866	InVision Precision Cardiac Amyloid	Invision Medical Technology Corporation	2025-05-21	2024-12-17	SDJ	Cardiovascular	2	Traditional/Hardware
K243302	3DMatrix DynaFlex (DynaFlex)	Printbio, Inc.	2025-05-21	2024-10-18	OXF	General, Plastic Surgery	2	Traditional/Hardware
K243429	HJY VisualNext 3D Endoscopic Vision System	Hjy Smart Medical Device Co., Ltd.	2025-05-21	2024-11-05	GWG	Neurology	2	Traditional/Hardware
K242857	ClearHemograsper	Finemedix Co., Ltd.	2025-05-21	2024-09-20	KGE	Gastroenterology, Urology	2	Traditional/Hardware
K250528	Stryker AlphaVent_x0099_ Knotless SP Biocomposite Anchor	Stryker Endoscopy	2025-05-21	2025-02-24	MAI	Orthopedic	2	Traditional/Hardware
K250199	VitalFlow Console	Medtronic, Inc.	2025-05-20	2025-01-23	QNR	Cardiovascular	2	Traditional/Hardware
K250489	FP3D	Keystone Industries	2025-05-20	2025-02-19	EBI	Dental	2	Traditional/Hardware
K251231	ViewFlex_x0099_ X ICE Catheter, Sensor Enabled_x0099_	Abbott Medical	2025-05-20	2025-04-22	OBJ	Cardiovascular	2	Traditional/Hardware
K250243	ProVu Single Use Video Stylet with Reinforced ET Tube (Size 6.5) (038-995-065U); ProVu Single Use Video Stylet with Reinforced ET Tube (Size 7.0) (038-995-070U); ProVu Single Use Video Stylet with Reinforced ET Tube (Size 7.5) (038-995-075U); ProVu Single Use Video Stylet with Reinforced ET Tube (Size 8.0) (038-995-080U)	Flexicare Medical Limited.	2025-05-20	2025-01-27	BTR	Anesthesiology	2	Traditional/Hardware
K250602	X-PAC® N-GAGE_x0099_ Lumbar Plate System	Expanding Innovations, Inc.	2025-05-20	2025-02-28	KWQ	Orthopedic	2	Traditional/Hardware
K250534	Biomic Color Opaque	Aidite (Qinhuangdao) Technology Co., Ltd.	2025-05-20	2025-02-24	EIH	Dental	2	Traditional/Hardware
K250866	Sovereign Posterior Cervical System	Met One Technologies, LLC	2025-05-20	2025-03-24	NKG	Orthopedic	2	Traditional/Hardware
K242485	EveryWare	Breas Medical AB	2025-05-20	2024-08-21	MOD	Anesthesiology	2	Traditional/Hardware
K243601	Route 92 Medical HiPoint Reperfusion System and Aspiration Tubing Set	Route 92 Medical, Inc.	2025-05-19	2024-11-21	NRY	Cardiovascular	2	Traditional/Hardware
K250390	CloSYS® Dry Mouth Sensitive Mouth Rinse	Rowpar Pharmaceuticals, Inc.	2025-05-19	2025-02-11	LFD	Unknown	U	Traditional/Hardware
K250456	Dentemp Pro-Comfort Dental Guard	Doc Brands, Inc.	2025-05-19	2025-02-18	OBR	Unknown	U	Traditional/Hardware
K243643	restor3d Reverse Total Shoulder Arthroplasty System	Restor3d	2025-05-19	2024-11-26	PHX	Orthopedic	2	Traditional/Hardware
K242755	Medical Diode Laser Systems (VELAS II-30B, VELAS II-30A, GBOX-15AB, GBOX-20B, CHEESE II-10B)	Gigaalaser Company , Ltd.	2025-05-19	2024-09-12	ILY	Physical Medicine	2	Traditional/Hardware
K250038	Muscle Stimulator Device (PZ-100)	Zhengzhou PZ Laser Slim Technology Co., Ltd.	2025-05-19	2025-01-08	NGX	Physical Medicine	2	Traditional/Hardware
K241581	Hemodialysis Catheter	Haolang Medical USA Corporation	2025-05-16	2024-06-03	MSD	Gastroenterology, Urology	2	Traditional/Hardware
K243837	iBSM	Iorbit Digital Technologies Private Limited	2025-05-16	2024-12-13	DRG	Cardiovascular	2	Traditional/Hardware
K242438	Clearo	Breas Medical AB	2025-05-16	2024-08-16	NHJ	Anesthesiology	2	Traditional/Hardware
K243927	MobileLink Acetabular Cup System - inhouse coatings	Waldemar Link GmbH & Co. KG	2025-05-16	2024-12-20	LZO	Orthopedic	2	Traditional/Hardware
K250971	Embosphere Microspheres	Biosphere Medical, S.A.	2025-05-16	2025-03-31	KRD	Cardiovascular	2	Traditional/Hardware
K244033	Electric Nasal Aspirator (NASA601,NASA602,NASA603,NASA605,NASA606,NASA608,NASA610)	Shenzhen Desida Technology Co., Ltd.	2025-05-16	2024-12-30	BTA	General, Plastic Surgery	2	Traditional/Hardware
K243602	Arthrex Spine Endoscope	Arthrex, Inc.	2025-05-16	2024-11-21	HRX	Orthopedic	2	Traditional/Hardware
K243176	BLESSING System	Cellah Medical Co., Ltd.	2025-05-16	2024-09-30	GEI	General, Plastic Surgery	2	Traditional/Hardware
K250086	OTS Hip	Ortoma AB	2025-05-16	2025-01-13	OLO	Neurology	2	Traditional/Hardware
K251184	AltiVate Reverse Shoulder System; RSP Shoulder System; SMR Shoulder System; PRIMA Humeral System; PRIMA Glenoid System	Encore Medical, L.P.	2025-05-16	2025-04-16	PHX	Orthopedic	2	Traditional/Hardware
K242706	Lumipulse G pTau217/ß-Amyloid 1-42 Plasma Ratio	Fujirebio Diagnostics,Inc.	2025-05-16	2024-09-09	SET	Immunology	2	Traditional/Hardware
K243105	Ruby Intravascular Catheter	Venocare, Inc.	2025-05-16	2024-09-30	FOZ	General Hospital	2	Traditional/Hardware
K242569	Mixed Reality Spine Navigation	Brainlab AG	2025-05-16	2024-08-28	SBF	Neurology	2	Traditional/Hardware
K242585	Cystatin C	SENTINEL CH. SpA	2025-05-16	2024-08-30	NDY	Clinical Chemistry	2	Traditional/Hardware
K250141	Synthecure Synthetic Calcium Sulfate	Austin Medical Ventures, Inc.	2025-05-16	2025-01-17	MQV	Orthopedic	2	Traditional/Hardware
K240857	Youmagic FLM System (YM5-U1)	We Medical Technology (Wuxi) Co., Ltd.	2025-05-15	2024-03-28	GEI	General, Plastic Surgery	2	Traditional/Hardware
K251186	Bard® Temporary Pacing Electrode Catheter Needle / Cannula (Introducer)	C.R. Bard, Inc.	2025-05-15	2025-04-16	LDF	Cardiovascular	2	Traditional/Hardware
K251156	NPseal	Guard Medical, Inc.	2025-05-15	2025-04-15	OKO	General, Plastic Surgery	2	Traditional/Hardware
K250213	OptaBlate BVN Intraosseous Nerve Ablation System (10mm Probe Single Kit); OptaBlate BVN Intraosseous Nerve Ablation System (10mm Probe Dual Kit)	Stryker Instruments	2025-05-15	2025-01-24	GXI	Neurology	2	Traditional/Hardware
K242931	HFT750U	Mekics Co., Ltd.	2025-05-15	2024-09-25	MNT	Anesthesiology	2	Traditional/Hardware
K250444	NEXUS® Hip Stem	Microport Orthopedics, Inc.	2025-05-15	2025-02-14	LZO	Orthopedic	2	Traditional/Hardware
K250451	NeurAxis IB-Stim (01-1020)	Neuraxis	2025-05-15	2025-02-18	QHH	Gastroenterology, Urology	2	Traditional/Hardware
K242155	DBB-06 PRO Hemodialysis Delivery System (DBB-06 PRO)	NIKKISO CO., LTD.	2025-05-15	2024-07-23	KDI	Gastroenterology, Urology	2	Traditional/Hardware
K250454	HardyDisk Aztreonam/Avibactam 30/20µg (AZA50)	Hardy Diagnostics	2025-05-15	2025-02-18	JTN	Microbiology	2	Traditional/Hardware
K243165	Limfa Therapy System (Limfa Therapy)	Eywa Srl	2025-05-15	2024-09-30	NGX	Physical Medicine	2	Traditional/Hardware
K242479	BLOOD TUBING LINES FOR HEMODIALYSIS AL Series (Archloop) BLOOD TUBING LINES FOR HEMODIALYSIS C18 Series AL-ADC-PU, AL-CDC-PU, C18RDC-PU, C18BDD-PU, C18SFD-PU	NIKKISO CO., LTD.	2025-05-15	2024-08-21	KOC	Gastroenterology, Urology	2	Traditional/Hardware
K250432	Colonovideoscope (CF-EZ1500DL); Colonovideoscope (CF-EZ1500DI); Gastrointestinal Videoscope (GIF-EZ1500)	Olympus Medical Systems Corporation	2025-05-15	2025-02-14	FDF	Gastroenterology, Urology	2	Traditional/Hardware
K242176	BLOOD TUBING LINES FOR HEMODIALYSIS AL Series (Archloop) BLOOD TUBING LINES FOR HEMODIALYSIS C18 Series (AL-ADC-E(U), AL-CDC-E(U), C18RDC-E(U), C18BDD-E(U), C18SFD-E(U)	NIKKISO CO., LTD.	2025-05-15	2024-07-24	KOC	Gastroenterology, Urology	2	Traditional/Hardware
K250276	Nitinol Enhanced Device (NED)	Embolization, Inc.	2025-05-15	2025-01-31	KRD	Cardiovascular	2	Traditional/Hardware
K242518	Hypertension Prediction Index (HePI) Algorithm	Edwards Lifesciences, LLC	2025-05-15	2024-08-23	QAQ	Cardiovascular	2	Traditional/Hardware
K243830	Disposable ureteral stent	Shenzhen Trious Medical Technology Co., Ltd.	2025-05-14	2024-12-13	FAD	Gastroenterology, Urology	2	Traditional/Hardware
K250414	CaloPix	Tribun Health	2025-05-14	2025-02-13	QKQ	Pathology	2	Traditional/Hardware
K250405	Nerivio; Nerivio Infinity	Theranica Bio-Electronics, Ltd.	2025-05-14	2025-02-13	QGT	Neurology	2	Traditional/Hardware
K250813	MICROLET®NEXT 2 Lancing Device	Ascensia Diabetes Care U.S., Inc.	2025-05-14	2025-03-17	QRL	General, Plastic Surgery	2	Traditional/Hardware
K250420	Helios Dura Regeneration Matrix	Helios Biomedical, Inc.	2025-05-14	2025-02-13	GXQ	Neurology	2	Traditional/Hardware
K251288	Veincare	Wontech Co., Ltd.	2025-05-14	2025-04-25	GEX	General, Plastic Surgery	2	Traditional/Hardware
K250533	Magnesium alloy scooter (RS100)	Taizhou Reach Technology Co., Ltd.	2025-05-14	2025-02-24	INI	Physical Medicine	2	Traditional/Hardware
K250775	Symphony_x0099_ Thrombectomy System; Symphony_x0099_ 16F 82cm Thrombectomy System	Imperative Care, Inc.	2025-05-14	2025-03-14	QEW	Cardiovascular	2	Traditional/Hardware
K250041	Medical Picosecond ND: YAG Laser System (PZ-6)	Zhengzhou PZ Laser Slim Technology Co., Ltd.	2025-05-14	2025-01-08	GEX	General, Plastic Surgery	2	Traditional/Hardware
K250712	Linkt Compression Staple System	Trax Surgical	2025-05-14	2025-03-10	JDR	Orthopedic	2	Traditional/Hardware
K250835	ETHICON 4000 60mm Compact Stapler (EC3D60C); ETHICON 4000 60mm Standard Stapler (EC3D60S); ETHICON 4000 60mm Long Stapler (EC3D60L); ETHICON 3D 60mm White Reload (ER60W); ETHICON 3D 60mm Blue Reload (ER60B); ETHICON 3D 60mm Green Reload (ER60G); ETHICON 3D 60mm Black Reload (ER60T)	Ethicon Endo-Surgery, LLC	2025-05-14	2025-03-20	GDW	General, Plastic Surgery	2	Traditional/Hardware
K242072	CeraRoot TL Implant System (TL)	Ceraroot SL	2025-05-14	2024-07-16	DZE	Dental	2	Traditional/Hardware
K242674	Freedom Posterior Cervical Screws	Signature Orthopaedics Pty, Ltd.	2025-05-13	2024-09-06	NKG	Orthopedic	2	Traditional/Hardware
K250418	Ulthera System (UC-1 Control Unit PRIME Model 2.1)	Ulthera, Inc.	2025-05-13	2025-02-13	OHV	General, Plastic Surgery	2	Traditional/Hardware
K250786	SP Endoscope, 0° (430600)	Intuitive Surgical, Inc.	2025-05-13	2025-03-14	NAY	Gastroenterology, Urology	2	Traditional/Hardware
K251138	Promisemed Safety Huber Needles	Promisemed Hangzhou Meditech Co., Ltd.	2025-05-13	2025-04-14	PTI	General Hospital	2	Traditional/Hardware
K250421	InThrill_x0099_ Thrombectomy System	Inari Medical, Inc.	2025-05-12	2025-02-13	QEW	Cardiovascular	2	Traditional/Hardware
K242418	P-Cure Proton Therapy System (PPTS)	P-Cure, Ltd.	2025-05-12	2024-08-15	LHN	Radiology	2	Traditional/Hardware
K250592	NES Reprocessed Visions PV .018 Digital IVUS Catheter (R-86700)	Northeast Scientific, Inc.	2025-05-12	2025-02-27	OWQ	Cardiovascular	2	Traditional/Hardware
K242477	Shoulder Soft Tissue Anchors	Signature Orthopaedics Pty, Ltd.	2025-05-12	2024-08-21	MBI	Orthopedic	2	Traditional/Hardware
K250868	SPECTRALIS HRA+OCT and variants	Heidelberg Engineering GmbH	2025-05-12	2025-03-24	OBO	Ophthalmic	2	Traditional/Hardware
K250393	ZircaGlow & ZircaGlow HT Zirconia	United Zirconia	2025-05-12	2025-02-12	EIH	Dental	2	Traditional/Hardware
K243509	Archer PSI System	3D-Side	2025-05-12	2024-11-12	QHE	Orthopedic	2	Traditional/Hardware
K244050	AYON Body Contouring System (AYON SYSTEM)	Apyx Medical Corporation	2025-05-12	2024-12-31	QPB	General, Plastic Surgery	2	Traditional/Hardware
K250763	Reon	C.E.I.B.Med	2025-05-12	2025-03-13	EBF	Dental	2	Traditional/Hardware
K250360	TENS AND EMS (TENS and Muscle Stimulator) (JT8012C,JT8016,JT9020E,JT9026)	Shenzhen Jiantuo Electronics Co., Ltd.	2025-05-11	2025-02-10	NUH	Neurology	2	Traditional/Hardware
K250377	Flowflex Plus COVID-19 + Flu A/B Home Test	ACON Laboratories, Inc.	2025-05-10	2025-02-10	SCA	Microbiology	2	Traditional/Hardware
K251425	turbodent touch	Mectron S.P.A.	2025-05-09	2025-05-08	KOJ	Dental	2	Traditional/Hardware
K251126	SKOUT system	Iterative Health	2025-05-09	2025-04-11	QNP	Gastroenterology, Urology	2	Traditional/Hardware
K243812	Volta AF-Xplorer	Volta Medical	2025-05-09	2024-12-11	DQK	Cardiovascular	2	Traditional/Hardware
DEN240045	Teal Wand	Teal Health, Inc.	2025-05-09	2024-08-27	SEP	Microbiology	2	Traditional/Hardware
K242692	SteadiSet Infusion Set	Capillary Biomedical, LLC	2025-05-09	2024-09-09	FPA	General Hospital	2	Traditional/Hardware
K242392	PATH BGC	Crossroads Neurovascular, Inc.	2025-05-09	2024-08-12	QJP	Cardiovascular	2	Traditional/Hardware
K243322	Altaviz Intravitreal Syringe	Altaviz, LLC	2025-05-09	2024-10-23	QLY	General Hospital	2	Traditional/Hardware
K243290	BTL-785MJ	BTL Industries, Inc.	2025-05-09	2024-10-18	NUW	Physical Medicine	2	Traditional/Hardware
K250299	CT/ MR Tandem and Ovoid Set	Varian Medical Systems, Inc.	2025-05-09	2025-01-31	JAQ	Radiology	2	Traditional/Hardware
K241086	Avidhrt Sense SpO2	Avidhrt, Inc.	2025-05-09	2024-04-19	DQA	Cardiovascular	2	Traditional/Hardware
K250400	Vigeon Laparoscopic Universal Smoke Evacuator (VG003)	Vigeon Technology Co., Ltd.	2025-05-09	2025-02-12	GEI	General, Plastic Surgery	2	Traditional/Hardware
K250053	TENS AND EMS (TENS and Muscle Stimulator) (JT8012, JT8012B)	Shenzhen Jiantuo Electronics Co., Ltd.	2025-05-09	2025-01-10	NUH	Neurology	2	Traditional/Hardware
K243107	Water Solubility Human Body Lubricant	Dongguan Yanxuan Biotechnology Co., Ltd.	2025-05-09	2024-09-30	NUC	Obstetrics/Gynecology	2	Traditional/Hardware
K251103	VeriSight Intracardiac Echocardiography Catheter (VSICE2D); VeriSight Pro Intracardiac Echocardiography Catheter (VSICE3D)	Philips Image Guided Therapy Corporation	2025-05-09	2025-04-11	OBJ	Cardiovascular	2	Traditional/Hardware
K242294	DiaSys Procalcitonin FS; DiaSys TruCal Procalcitonin Calibrator Set; DiaSys TruLab Procalcitonin Bi-Level Controls	Diasys Diagnostic Systems GmbH	2025-05-09	2024-08-02	PTF	Microbiology	2	Traditional/Hardware
K242388	LensHooke X12 PRO Semen Analysis System	Bonraybio Co., Ltd.	2025-05-09	2024-08-12	POV	Hematology	2	Traditional/Hardware
K242732	Tristel OPH	Tristel Solutions , Ltd.	2025-05-09	2024-09-10	QWS	General Hospital	2	Traditional/Hardware
K251133	AVEA disposable expiratory filter/water trap (11790)	Telesair, Inc.	2025-05-08	2025-04-11	CBK	Anesthesiology	2	Traditional/Hardware
K250582	COLONNADE Posterior Screw Fixation System	CG Bio Co., Ltd.	2025-05-08	2025-02-27	NKB	Orthopedic	2	Traditional/Hardware
K243824	Preat Abutments	Preat Corporation	2025-05-08	2024-12-12	NHA	Dental	2	Traditional/Hardware
K243764	Medical Diode Laser (UTU3-F7B,UTU3-F7W,UTU3-G7B,UTU3-G7W,UTU-G20B,UTU-G20W)	Wuhan Pioon Technology Co., Ltd.	2025-05-08	2024-12-06	NVK	General, Plastic Surgery	2	Traditional/Hardware
K242410	NextStep Arthropedix Total Knee System	Nextstep Arthropedix	2025-05-08	2024-08-14	JWH	Orthopedic	2	Traditional/Hardware
K233271	OsseOne Dental Implant System	Synoross Dba Osseone	2025-05-08	2023-09-29	DZE	Dental	2	Traditional/Hardware
K250482	Advanced Anti Snoring Device 4.0 Clear/ Advanced Anti Snoring Device 4.0 Blue	Fissiontech, LLC	2025-05-08	2025-02-19	LRK	Dental	2	Traditional/Hardware
K243419	Altus Spine Navigation System	Altus Partners, LLC	2025-05-08	2024-11-04	OLO	Neurology	2	Traditional/Hardware
K251111	Cary	Excitus AS	2025-05-07	2025-04-11	JCX	General, Plastic Surgery	2	Traditional/Hardware
K243776	Anti-Neutrophil Cytoplasmic Antibodies (Ethanol-Fixed); Anti-Neutrophil Cytoplasmic Antibodies (Formalin-Fixed)	Zeus Scientific	2025-05-07	2024-12-09	MOB	Immunology	2	Traditional/Hardware
K251128	Extremity Medical External Fixation System	Extremity Medical, LLC	2025-05-07	2025-04-11	KTT	Orthopedic	2	Traditional/Hardware
K242975	Mobility Scooter (Model X-01, X-02)	Wuyi Aichi Industry & Trade Co., Ltd.	2025-05-07	2024-09-26	INI	Physical Medicine	2	Traditional/Hardware
K250222	SDF Pro	Belport Company, Inc., Gingi-Pak	2025-05-07	2025-01-27	PHR	Dental	2	Traditional/Hardware
K251094	Alma Veil	Wontech Co., Ltd.	2025-05-06	2025-04-10	GEX	General, Plastic Surgery	2	Traditional/Hardware
K250160	ANKYRAS	Mentice Spain S.L.	2025-05-06	2025-01-21	PZO	Radiology	2	Traditional/Hardware
K250785	Single-use Flexible Ureteroscope	Hunan Vathin Medical Instrument Co., Ltd.	2025-05-06	2025-03-14	FGB	Gastroenterology, Urology	2	Traditional/Hardware
K242962	Telemetry Monitor 5500 Release 4.0 (867232)	Philips Medizin Systeme Böblingen GmbH	2025-05-05	2024-09-25	MHX	Cardiovascular	2	Traditional/Hardware
K242937	Dream Medi Sterile Surgical Gown (SurgicalGownUL)	Dae Myung Chemical Co., Ltd. (Vietnam)	2025-05-05	2024-09-25	FYA	General, Plastic Surgery	2	Traditional/Hardware
K243370	DentaTOOTH	Asiga Pty, Ltd.	2025-05-05	2024-10-30	EBG	Dental	2	Traditional/Hardware
K242754	ZT Clinic (MG675A); ZT Cube (ZC3) (MG465A); Z-ONE (MG455A)	Zamar Medical D.O.O.	2025-05-05	2024-09-12	IRP	Physical Medicine	2	Traditional/Hardware
K240447	ThermoChem HT-2000 System and Intraperitoneal Hyperthermia (IPH) Procedure Kit (HT-2000)	Thermasolutions, LLC	2025-05-05	2024-02-15	MLW	Gastroenterology, Urology	2	Traditional/Hardware
K243603	AeviceMD	Aevice Health Pte. , Ltd.	2025-05-05	2024-11-21	DSH	Cardiovascular	2	Traditional/Hardware
K242386	Bluemoon	GENOSS Co., Ltd.	2025-05-05	2024-08-12	EBZ	Dental	2	Traditional/Hardware
K250728	Arthrex Synergy Vision Endoscopic Imaging System	Arthrex, Inc.	2025-05-05	2025-03-11	GCJ	Gastroenterology, Urology	2	Traditional/Hardware
K243457	Nixall Antimicrobial Solutions_x0099_ Skin & Wound Hydrogel	Seriously Clean, Ltd.	2025-05-02	2024-11-07	FRO	Unknown	U	Traditional/Hardware
K243757	Shockwave CS Guide Catheter	Shockwave Medical., Inc.	2025-05-02	2024-12-06	DQY	Cardiovascular	2	Traditional/Hardware
K250629	Sutil Rich Personal Lubricant	Hathor Professional Skincare , Ltd.	2025-05-02	2025-03-03	NUC	Obstetrics/Gynecology	2	Traditional/Hardware
K251056	Anovo Instrument ARM Curved Scissors ; Anovo Instrument ARM Hook Electrode	Momentis Surgical , Ltd.	2025-05-02	2025-04-04	QNM	General, Plastic Surgery	2	Traditional/Hardware
K243043	Origin_x0099_ Cemented Hip Stem	Signature Orthopaedics Pty, Ltd.	2025-05-02	2024-09-27	LZO	Orthopedic	2	Traditional/Hardware
K244001	KARL STORZ Cysto-Urethro-Fiberscope (11272CU1); KARL STORZ Cysto-Urethro-Fiberscope (11272C2)	Karl Storz SE & CO. KG	2025-05-02	2024-12-26	FBO	Gastroenterology, Urology	2	Traditional/Hardware
K250161	Wrist Blood Pressure Monitor (AOJ-35A); Wrist Blood Pressure Monitor (AOJ-35B); Wrist Blood Pressure Monitor (WRS-35B); Wrist Blood Pressure Monitor (AOJ-35D); Wrist Blood Pressure Monitor (AOJ-35E); Wrist Blood Pressure Monitor (AOJ-35F); Wrist Blood Pressure Monitor (AOJ-35G); Wrist Blood Pressure Monitor (WRS-35G); Wrist Blood Pressure Monitor (WRS-35H); Wrist Blood Pressure Monitor (WRS-35K);…	Shenzhen AOJ Medical Technology Co., Ltd.	2025-05-02	2025-01-21	DXN	Cardiovascular	2	Traditional/Hardware
K243114	SQA-iOw Sperm Quality Analyzer	Medical Electronic Systems , Ltd.	2025-05-02	2024-09-30	POV	Hematology	2	Traditional/Hardware
K243894	F88 URE-SD/RD Flexible Ureteroscope	Sg Endoscopy Pte, Ltd.	2025-05-02	2024-12-18	FGB	Gastroenterology, Urology	2	Traditional/Hardware
K244014	i-STAT CG4+ cartridge with the i-STAT 1 System	Abbott Point of Care, Inc.	2025-05-02	2024-12-26	CHL	Clinical Chemistry	2	Traditional/Hardware
K242986	SpO2 Extension Cable	Beijing Rongrui-Century Science & Technology Co., Ltd.	2025-05-02	2024-09-26	DSA	Cardiovascular	2	Traditional/Hardware
K250292	OSPREY Midline Closed IV Catheter System (OspreyEDC-F20)	Skydance Vascular, Inc.	2025-05-02	2025-01-31	FOZ	General Hospital	2	Traditional/Hardware
K242763	JetCan® Pro Safety Huber Needle	Pfm Medical, Inc.	2025-05-02	2024-09-12	FPA	General Hospital	2	Traditional/Hardware
K242583	AT-Patch (ATP-C130/ATP-C70)	Atsens Co., Ltd.	2025-05-02	2024-08-30	DSH	Cardiovascular	2	Traditional/Hardware
K242315	Resolve Modular Revision Hip Stem	United Orthopedic Corporation	2025-05-01	2024-08-05	MEH	Orthopedic	2	Traditional/Hardware
K250296	Disposable Distal Attachment D-201 Series	Olympus Medical Systems Corp.	2025-05-01	2025-01-31	FDS	Gastroenterology, Urology	2	Traditional/Hardware
K243870	X°Port Lung Preservation System; X°Port Lung Preservation Solution	Traferox Technologies, Inc.	2025-05-01	2024-12-17	KDN	Gastroenterology, Urology	2	Traditional/Hardware
K250995	Xpert Xpress CoV-2/Flu/RSV plus	Cepheid®	2025-05-01	2025-04-01	QOF	Microbiology	2	Traditional/Hardware
K243521	Conical Ti Base abutments	BioHorizons Implant Systems, Inc.	2025-05-01	2024-11-13	NHA	Dental	2	Traditional/Hardware
K251007	CrossWise RF Transseptal Access System (Models: CW-1085S, CW-1085A, CW-1012W, CW-1012C, CW-1085C, CW-1085V, CW-1013F)	Circa Scientific, Inc.	2025-05-01	2025-04-01	DXF	Cardiovascular	2	Traditional/Hardware
K251014	APRO 45 Catheter	Alembic, LLC	2025-05-01	2025-04-02	DQY	Cardiovascular	2	Traditional/Hardware
K250641	APEX 3D Total Ankle Replacement System	Paragon 28, Inc.	2025-05-01	2025-03-04	HSN	Orthopedic	2	Traditional/Hardware
K244020	Wrinkle Treatment Device (JM1, JM2B)	Shenzhen Qianyu Technology Co., Ltd.	2025-05-01	2024-12-27	OHS	General, Plastic Surgery	2	Traditional/Hardware
K250996	Xpert Xpress CoV-2/Flu/RSV plus	Cepheid®	2025-05-01	2025-04-01	QOF	Microbiology	2	Traditional/Hardware
K243934	Stable-L Lumbar Interbody System	Nexus Spine, LLC	2025-04-30	2024-12-20	OVD	Orthopedic	2	Traditional/Hardware
K251024	TEG 6s Hemostasis System Citrated: K, KH, RT, FF Assay Cartridge	Haemonetics	2025-04-30	2025-04-02	JPA	Hematology	2	Traditional/Hardware
K251015	APRO 45 Catheter and Alembic Aspiration Tubing	Alembic, LLC	2025-04-30	2025-04-02	NRY	Cardiovascular	2	Traditional/Hardware
K251051	AuST Steerable Sheath	CenterPoint Systems, LLC	2025-04-30	2025-04-03	DYB	Cardiovascular	2	Traditional/Hardware
K244000	Arm Blood Pressure Monitor (ARM-30A+);Arm Blood Pressure Monitor (ARM-30G2);Arm Blood Pressure Monitor (ARM-30Q);Arm Blood Pressure Monitor (ARM-30E+);	Shenzhen AOJ Medical Technology Co., Ltd.	2025-04-30	2024-12-26	DXN	Cardiovascular	2	Traditional/Hardware
K250683	Resolve Fundus Camera	Optain Health, Inc.	2025-04-30	2025-03-06	HKI	Ophthalmic	2	Traditional/Hardware
K250295	Dentsply Sirona Titanium Bases system	Dentsply Sirona	2025-04-30	2025-01-31	NHA	Dental	2	Traditional/Hardware
K250907	Sol-Guard TM XtraThin Safety Pull-Button Blood Collection Set	Sol-Millennium Medical, Inc.	2025-04-30	2025-03-26	JKA	Clinical Chemistry	2	Traditional/Hardware
K243541	LumiRex Bronchoscope	Contra Healthcare Solutions, LLC	2025-04-30	2024-11-15	EOQ	Ear, Nose, Throat	2	Traditional/Hardware
K250497	Additive Manufacturing (Light Curing) Crown Bridge Resin	Aidite (Qinhuangdao) Technology Co., Ltd.	2025-04-30	2025-02-20	EBF	Dental	2	Traditional/Hardware
K243942	Arctic Sun Stat Temperature Management System	Medivance, Inc.	2025-04-30	2024-12-20	DWJ	Cardiovascular	2	Traditional/Hardware
K242354	AllNEB	Enchant Tek Co. , Ltd.	2025-04-29	2024-08-08	CAF	Anesthesiology	2	Traditional/Hardware
K243886	ExpressCore Biopsy Device	Inrad, Inc.	2025-04-29	2024-12-18	KNW	Gastroenterology, Urology	2	Traditional/Hardware
K243963	Pediatric Plating Platform Hip	Orthopediatrics Corp.	2025-04-29	2024-12-23	HRS	Orthopedic	2	Traditional/Hardware
K250617	Apex Flex	Sprintray, Inc.	2025-04-29	2025-02-28	EBI	Dental	2	Traditional/Hardware
K250962	APRO 55 Intermediate Catheter	Alembic, LLC	2025-04-29	2025-03-31	DQY	Cardiovascular	2	Traditional/Hardware
K242255	Qitexio® 4-Way Stopcock (QIT014)	Medex	2025-04-29	2024-07-31	FMG	General Hospital	2	Traditional/Hardware
K242495	LMA Fastrach ETT SU	Teleflex Medical	2025-04-29	2024-08-22	BTR	Anesthesiology	2	Traditional/Hardware
K242211	PUMA-G Pediatric System	Coaptech, Inc.	2025-04-29	2024-07-29	KGC	Gastroenterology, Urology	2	Traditional/Hardware
K243896	LenSx Laser System (8065998162)	Alcon Laboratories, Inc.	2025-04-28	2024-12-18	OOE	Ophthalmic	2	Traditional/Hardware
K250958	APRO 55 Swift Catheter and Alembic Aspiration Tubing	Alembic, LLC	2025-04-28	2025-03-31	NRY	Cardiovascular	2	Traditional/Hardware
K250977	Suture-TOOL System	Suturion AB	2025-04-28	2025-03-31	NEW	General, Plastic Surgery	2	Traditional/Hardware
K250256	Solo+ Tympanostomy Tube Device (TTD), Solo+ TTD, Solo+ (Solo+ Tympanostomy Tube Handpiece (Catalogue #: 12115-100-000) and Solo+ Tympanostomy Tube Cartridge (Catalogue #: 12115-200-000))	Aventamed Dac	2025-04-28	2025-01-28	ETD	Ear, Nose, Throat	2	Traditional/Hardware
K243532	LumiRex Ureteroscope	Contra Healthcare Solutions, LLC	2025-04-28	2024-11-15	FGB	Gastroenterology, Urology	2	Traditional/Hardware
K241663	Eminent Spine 3D Titanium Pedicle Screw System	Eminent Spine	2025-04-28	2024-06-07	NKB	Orthopedic	2	Traditional/Hardware
K243082	Infrared Thermometer	Guangzhou Daxin Health Technology Co., Ltd.	2025-04-25	2024-09-30	FLL	General Hospital	2	Traditional/Hardware
K243821	i-Cut	A.M.I. Agency For Medical Innovations GmbH	2025-04-25	2024-12-12	HET	Obstetrics/Gynecology	2	Traditional/Hardware
K250608	Mako Total Knee Application (3.0); Hybrid Tip Pointer	Mako Surgical Corp.	2025-04-25	2025-02-28	OLO	Neurology	2	Traditional/Hardware
K243998	DCX Disposable Cassette (DCX)	Institut Geroges Lopez	2025-04-25	2024-12-26	KDN	Gastroenterology, Urology	2	Traditional/Hardware
K250289	Intracavitary/Interstitial System	Varian Medical Systems	2025-04-25	2025-01-31	JAQ	Radiology	2	Traditional/Hardware
K243400	cobas liat SARS-CoV-2 & Influenza A/B v2 nucleic acid test	Roche Molecular Systems, Inc.	2025-04-25	2024-10-31	QOF	Microbiology	2	Traditional/Hardware
K250554	prodisc® L Instruments	Centinel Spine, LLC	2025-04-25	2025-02-25	QLQ	Orthopedic	2	Traditional/Hardware
K243406	cobas liat SARS-CoV-2, Influenza A/B & RSV nucleic acid test	Roche Molecular Systems, Inc.	2025-04-25	2024-11-01	QOF	Microbiology	2	Traditional/Hardware
K244026	PAL 7020 Console	Microaire Surgical Instruments, LLC	2025-04-25	2024-12-30	QPB	General, Plastic Surgery	2	Traditional/Hardware
K243721	Self Sealing Sterilization Pouches	Wellmed Dental Medical Supply Co., Ltd.	2025-04-25	2024-12-03	FRG	General Hospital	2	Traditional/Hardware
K243041	contact forte Alpha	Bhm-Tech Produktionsgesellschaft Mbh	2025-04-25	2024-09-27	LXB	Ear, Nose, Throat	2	Traditional/Hardware
K243876	VERIFY STEAM Integrating Indicator	STERIS Corporation	2025-04-25	2024-12-18	JOJ	General Hospital	2	Traditional/Hardware
K251117	Cervical Spine Truss System (CSTS)	4Web Medical	2025-04-25	2025-04-11	OVE	Orthopedic	2	Traditional/Hardware
K243570	Dimension LOCI Thyroid Stimulating Hormone Flex reagent cartridge (TSHL); Dimension LOCI Free Thyroxine Flex reagent cartridge (FT4L)	Siemens Healthcare Diagnostics	2025-04-25	2024-11-18	JLW	Clinical Chemistry	2	Traditional/Hardware
K243861	butterflyBVM	Compact Medical, Inc.	2025-04-25	2024-12-16	BTM	Anesthesiology	2	Traditional/Hardware
K250426	Amulet_x0099_ Steerable Delivery Sheath	Abbott Medical	2025-04-25	2025-02-14	DQY	Cardiovascular	2	Traditional/Hardware
K250892	CastleLoc Pectus Bar System	L & K Biomed Co., Ltd.	2025-04-25	2025-03-25	HRS	Orthopedic	2	Traditional/Hardware
K250153	Neu Platform	Neuhealth Digital , Ltd.	2025-04-25	2025-01-21	GYD	Neurology	2	Traditional/Hardware
K250909	Prelude Wave Hydrophilic Sheath Introducer	Merit Medical Systems, Inc.	2025-04-25	2025-03-26	DYB	Cardiovascular	2	Traditional/Hardware
K251075	DYNAMIS_x0099_ Implant System	Promethean Restorative, LLC	2025-04-25	2025-04-08	OUR	Orthopedic	2	Traditional/Hardware
K243264	DHF 0.2 Hemoconcentrator (DHF 02); DHF 0.6 Hemoconcentrator (DHF 06); SH 14 Hemoconcentrator (SH 14)	Sorin Group Italia S.R.L.	2025-04-25	2024-10-15	KDI	Gastroenterology, Urology	2	Traditional/Hardware
K242469	RFMagik Lite	Agnes Medical Co., Ltd.	2025-04-25	2024-08-20	GEI	General, Plastic Surgery	2	Traditional/Hardware
K250723	FreedomFlow_x0099_ Orbital Circumferential Atherectomy System (H6005/ 4Fr 3-Sphere Configuration)	Cardio Flow Inc.,	2025-04-25	2025-03-10	MCW	Cardiovascular	2	Traditional/Hardware
K242214	Sonu	Sound Health Systems, Inc.	2025-04-24	2024-07-29	QZC	Ear, Nose, Throat	2	Traditional/Hardware
K250183	CO2 Laser System (CO2 Laser SST-L23)	Zhuozhou Summer Star Technologies Co., Ltd.	2025-04-24	2025-01-22	GEX	General, Plastic Surgery	2	Traditional/Hardware
K233337	Freespira Breathing System	Freespira, Inc.	2025-04-24	2023-09-29	SEN	Neurology	2	Traditional/Hardware
K250206	Diode laser system (Night Universe; Predator)	Ivylaser (Beijing) Technology Co.,Ltd	2025-04-24	2025-01-24	GEX	General, Plastic Surgery	2	Traditional/Hardware
K250002	Smart Check O2 (MA0236)	Life Spark Medical, LLC	2025-04-24	2025-01-02	CCL	Anesthesiology	2	Traditional/Hardware
K243954	PeriCross_x0099_ Epicardial Access Kit	Circa Scientific, Inc.	2025-04-24	2024-12-23	DYB	Cardiovascular	2	Traditional/Hardware
K242973	CanMINI Hand and Foot System	Canwell Medical Co., Ltd.	2025-04-24	2024-09-26	HRS	Orthopedic	2	Traditional/Hardware
K250262	GO-PEN®	Go-Pen Aps	2025-04-24	2025-01-29	FMF	General Hospital	2	Traditional/Hardware
K243714	da Vinci SP Surgical System (SP1098)	Intuitive Surgical, Inc.	2025-04-24	2024-12-02	NAY	Gastroenterology, Urology	2	Traditional/Hardware
K250116	Arm Blood Pressure Monitor (ARM-30H); Arm Blood Pressure Monitor (ARM-30J); Arm Blood Pressure Monitor (ARM-30K); Arm Blood Pressure Monitor (ARM-90B)	Shenzhen AOJ Medical Technology Co., Ltd.	2025-04-24	2025-01-16	DXN	Cardiovascular	2	Traditional/Hardware
K243945	ALARA BMA Neuro Access Kit (ALARA BMAN and ALARA BMAC Kit)	SurGenTec, LLC	2025-04-24	2024-12-20	KNW	Gastroenterology, Urology	2	Traditional/Hardware
K242963	MENTOR_x0099_ PliaForm_x0099_ Breast Tissue Expander w/ Suture Tabs	Mentor Worldwide, LLC	2025-04-24	2024-09-25	LCJ	Unknown	U	Traditional/Hardware
K242514	Endo Motor (E-LITE MAX, E-LITE PRO, E-LITE INO)	Shenzhen Rogin Medical Co., Ltd.	2025-04-24	2024-08-23	EKX	Dental	1	Traditional/Hardware
K250697	Electric Nasal Aspirator (BC026, BC025, BC023)	Shenzhen Kingboom Technology Co., Ltd.	2025-04-23	2025-03-07	BTA	General, Plastic Surgery	2	Traditional/Hardware
K250869	Parietene_x0099_ Macroporous Mesh (PPM5050 )	Sofradim Production	2025-04-23	2025-03-24	FTL	General, Plastic Surgery	2	Traditional/Hardware
K242531	NOVEOS Specific IgE (sIgE) Assay; Capture Reagent G010, Johnson Grass (Sorghum halepense); Capture Reagent T007, Oak (Quercus alba) ; Capture Reagent G002, Bermuda Grass (Cynodon dactylon); Capture Reagent W001, Common Ragweed (Ambrosia artemisiifolia); Capture Reagent E005, Dog Dander (Canis familiaris); Capture Reagent T003, Common Silver Birch (Betula verrucosa); Capture Reagent F001, Egg Whit…	Hycor Biomedical	2025-04-23	2024-08-26	DHB	Immunology	2	Traditional/Hardware
K250944	Nitrile Powder Free Examination Glove, Blue Tested for Use with 60 Chemotherapy Drugs, Gastric Acid, Xylazine and Fentanyl	Gmp Medicare Sdn. Bhd.	2025-04-23	2025-03-28	LZA	General Hospital	1	Traditional/Hardware
K250198	Laon Ortho	Laon Medi, Inc.	2025-04-23	2025-01-23	PNN	Dental	2	Traditional/Hardware
K250155	Xpert Knee	Newclip Technics	2025-04-23	2025-01-21	HRS	Orthopedic	2	Traditional/Hardware
K242232	Mpact 3D Metal Augments II	Medacta International S.A.	2025-04-23	2024-07-30	LPH	Orthopedic	2	Traditional/Hardware
K243326	Dynamis Robotic Surgical System	Lem Surgical AG	2025-04-23	2024-10-24	OLO	Neurology	2	Traditional/Hardware
K242542	Medentika CAD/CAM Abutments	Medentika GmbH	2025-04-22	2024-08-26	NHA	Dental	2	Traditional/Hardware
K243343	BD CTGCTV2	Bd Integrated Diagnostic Solutions/Becton,	2025-04-22	2024-10-25	QEP	Microbiology	2	Traditional/Hardware
K243621	Evoblock, Perléon	Evoden Indústria Comércio Importação E Exportação	2025-04-22	2024-11-22	EBG	Dental	2	Traditional/Hardware
K241931	OcuMet Beacon (OCUB100)	Ocusciences, Inc.	2025-04-22	2024-07-01	MYC	Ophthalmic	2	Traditional/Hardware
K250669	Adaptix_x0099_ Interbody System with Titan nanoLOCK_x0099_ Surface Technology	Medtronic Sofamor Danek USA, Inc.	2025-04-22	2025-03-05	MAX	Orthopedic	2	Traditional/Hardware
K243944	Aperta NSE PTA Balloon Dilatation Catheter	Goodman Co., Ltd.	2025-04-22	2024-12-20	PNO	Cardiovascular	2	Traditional/Hardware
K243386	Ventris Intervertebral Body Fusion Device	Acuity Surgical Devices, LLC	2025-04-22	2024-10-31	OVD	Orthopedic	2	Traditional/Hardware
K251196	Composite Orthodontic Brackets and Buttons	Ec Certification Service GmbH	2025-04-21	2025-04-17	DYW	Dental	2	Traditional/Hardware
K250176	DAND Dental Implant System	D.A.N.D. Metal Industries North, Ltd.	2025-04-21	2025-01-22	DZE	Dental	2	Traditional/Hardware
K242254	D·Kutting_x0099_ LL Peripheral Scoring Balloon Dilatation Catheter	Dk Medical Technology Co., Ltd.	2025-04-21	2024-07-31	PNO	Cardiovascular	2	Traditional/Hardware
K243508	Wearable breast pump (model S12A)	Shenzhen TPH Technology Co., Ltd.	2025-04-21	2024-11-12	HGX	Obstetrics/Gynecology	2	Traditional/Hardware
K243875	Spectricept Skin and Wound Cleanser	Spectrum Antimicrobials, Inc.	2025-04-21	2024-12-17	FRO	Unknown	U	Traditional/Hardware
K250146	SofWave System	Sofwave Medical, Ltd.	2025-04-18	2025-01-21	NGX	Physical Medicine	2	Traditional/Hardware
K250224	handLITE (TN19S)	Ismart Developments, Ltd.	2025-04-18	2025-01-27	ONE	General, Plastic Surgery	2	Traditional/Hardware
K242170	K-ASSAY CRP (Ver.2)	Kamiya Biomedical Company, LLC	2025-04-18	2024-07-24	DCK	Immunology	2	Traditional/Hardware
K250842	PADLOCK CLIP EFTR Kit (00713229)	STERIS Corporation	2025-04-18	2025-03-20	PKL	Gastroenterology, Urology	2	Traditional/Hardware
K240775	PeriBeam® Pericardial Membrane	Tamabio	2025-04-18	2024-03-21	DXZ	Cardiovascular	2	Traditional/Hardware
K250481	Extension Feeding Set with ENFit_x0099_ Connectors	SKY Medical, a.s.	2025-04-18	2025-02-19	PIF	Gastroenterology, Urology	2	Traditional/Hardware
K250834	Zimmer Biomet Ceramic Heads (22.2mm diameter)	Zimmer Biomet	2025-04-18	2025-03-19	LZO	Orthopedic	2	Traditional/Hardware
K240355	FROG (Filter Removal of Glass)	Carrtech Corp	2025-04-18	2024-02-05	FMI	General Hospital	2	Traditional/Hardware
K241188	Acucy® Influenza A&B Test with the Acucy® 2 System	Sekisui Diagnostics, LLC	2025-04-18	2024-04-29	PSZ	Microbiology	2	Traditional/Hardware
DEN240062	Minder System	Epi-Minder Pty, Ltd.	2025-04-17	2024-10-18	SEM	Neurology	2	Traditional/Hardware
K242337	FlowGuide (FG60F); GuidionShort (GS60F)	Imds Operations B.V.	2025-04-17	2024-08-07	DQY	Cardiovascular	2	Traditional/Hardware
K250829	Lacevo Wearable Breast Pump (Model S70)	Shenzhen TPH Technology Co., Ltd.	2025-04-17	2025-03-19	HGX	Obstetrics/Gynecology	2	Traditional/Hardware
K243878	CLARUS (700)	Carl Zeiss Meditec, Inc.	2025-04-17	2024-12-18	QER	Ophthalmic	2	Traditional/Hardware
K243337	Dental Cone Beam Computed Tomography System	Yofo Medical Technology Co., Ltd.	2025-04-17	2024-10-25	OAS	Radiology	2	Traditional/Hardware
K250499	RELiZORB (100300/100301)	Alcresta Therapeutics, Inc.	2025-04-17	2025-02-20	PLQ	Gastroenterology, Urology	2	Traditional/Hardware
K243459	Ultimate rTMS for OCD (M-series)	Brain Ultimate, Inc.	2025-04-17	2024-11-08	QCI	Neurology	2	Traditional/Hardware
K250270	Luja Set	Coloplast Corp.	2025-04-17	2025-01-30	EZD	Gastroenterology, Urology	2	Traditional/Hardware
K250889	EXULT Knee Replacement System	Corentec Co., Ltd.	2025-04-17	2025-03-25	JWH	Orthopedic	2	Traditional/Hardware
K242129	VitalRhythm	Vitalconnect, Inc.	2025-04-17	2024-07-22	DQK	Cardiovascular	2	Traditional/Hardware
K243460	Ultimate rTMS	Brain Ultimate, Inc.	2025-04-17	2024-11-08	OBP	Neurology	2	Traditional/Hardware
K243750	SimpleStitch Suturing System	Envision Endoscopy	2025-04-17	2024-12-05	OCW	Gastroenterology, Urology	2	Traditional/Hardware
K250455	FLUOBEAM LX Imaging System (FBLX); FLUOBEAM LM Imaging System (FBLM)	Fluoptics Sas (A Getinge Group Company}	2025-04-17	2025-02-18	QDG	General, Plastic Surgery	2	Traditional/Hardware
K241733	HEBE (NP0000763)	Novasonix Technology S.L.	2025-04-16	2024-06-17	PBX	General, Plastic Surgery	2	Traditional/Hardware
K250809	Stellar M22	Lumenis Be, Ltd.	2025-04-16	2025-03-17	GEX	General, Plastic Surgery	2	Traditional/Hardware
K243513	DCM (PW-DCM)	Pneumowave, Ltd.	2025-04-16	2024-11-12	LEL	Neurology	2	Traditional/Hardware
K250850	Nanox.ARC X	Nano-X Imaging , Ltd.	2025-04-16	2025-03-20	IZF	Radiology	2	Traditional/Hardware
K242806	Medyssey Navigation System	Medyssey Co, Ltd.	2025-04-16	2024-09-17	OLO	Neurology	2	Traditional/Hardware
K250803	Deepblue Multi-Drug Urine Test Cup; Deepblue Home Muti-Drug Urine Test Cup	Anhui Deepblue Medical Technological Co., Ltd.	2025-04-15	2025-03-17	NGL	Clinical Toxicology	2	Traditional/Hardware
K242786	TearCare MGX System	Sight Sciences, Inc.	2025-04-15	2024-09-16	ORZ	Ophthalmic	2	Traditional/Hardware
K243055	Préime DermaFacial Collagen+	EMA Aesthetics , Ltd.	2025-04-15	2024-09-27	PBX	General, Plastic Surgery	2	Traditional/Hardware
K250824	Percuflex Ureteral Stent; Percuflex Plus Ureteral Stent; Percuflex Plus SureDrive Steerable Ureteral Stent Set; Contour Ureteral Stent; Contour SureDrive Steerable Ureteral Stent Set; Contour VL Variable Length Ureteral Stent; Contour VL SureDrive Steerable Ureteral Stent Set; Polaris Ultra Ureteral Stent; Polaris Loop Ureteral Stent; Tria Firm Ureteral Stent; Tria Soft Ureteral Stent; Percuflex …	Boston Scientific Corporation	2025-04-15	2025-03-18	FAD	Gastroenterology, Urology	2	Traditional/Hardware
K242773	Electro Lube NXT	Steris	2025-04-15	2024-09-13	GEI	General, Plastic Surgery	2	Traditional/Hardware
K250327	OptaBlate Radiofrequency (RF) Generator System	Stryker Instruments	2025-04-15	2025-02-05	GEI	General, Plastic Surgery	2	Traditional/Hardware
K242932	Skin Clinic Nitro Clear Wart Remover	Cryoconcepts Lp,	2025-04-15	2024-09-25	GEH	General, Plastic Surgery	2	Traditional/Hardware
K250833	SwissMembrane X; SwissMembrane X Socket	Geistlich Pharma AG	2025-04-15	2025-03-19	NPL	Dental	2	Traditional/Hardware
K250402	AVAVA_x0099_ Skin Treatment System	Avava, Inc.	2025-04-14	2025-02-12	ONG	General, Plastic Surgery	2	Traditional/Hardware
K250823	Any-Com Flow	Mediclus Co., Ltd.	2025-04-14	2025-03-18	EBF	Dental	2	Traditional/Hardware
K250094	Atlas Stim Headbox (NK) (31-0601-0077); Atlas Stim Headbox (Touchproof) (31-0601-0089); Atlas Stim Headbox (HD) (31-0601-0132); ASHB FIBER OPTIC DUPLEX CONN 2m (31-0204-0001); ASHB FIBER OPTIC DUPLEX CONN 7m (31-0204-0002); ATLAS Stim Headbox Software (36-0301-0006); Atlas Headbox Interface Cable (NK) (31-0204-003); Atlas Headbox Interface Cable (Touchproof) (31-0204-004); Atlas Headbox Interface…	Neuralynx, Inc.	2025-04-14	2025-01-14	GYC	Neurology	2	Traditional/Hardware
K243852	Elfor-L	Elfi-Tech , Ltd.	2025-04-14	2024-12-16	DPW	Cardiovascular	2	Traditional/Hardware
K250802	STERRAD® 100NX Sterilizer with ALLClear_x0099_ Technology (10104)	Advanced Sterilization Products, Inc.	2025-04-14	2025-03-14	MLR	General Hospital	2	Traditional/Hardware
K243356	Asiga DentaBASE	Asiga Pty, Ltd.	2025-04-11	2024-10-29	EBI	Dental	2	Traditional/Hardware
K243537	XeliteMed VertehighFix High Viscosity Spinal Bone Cement System	Xelite Biomed , Ltd.	2025-04-11	2024-11-15	NDN	Orthopedic	2	Traditional/Hardware
K243558	Canvas Dx	Cognoa, Inc.	2025-04-11	2024-11-18	QPF	Neurology	2	Traditional/Hardware
K250748	KLAXON (TWIST); KLAXON (TWIST R)	Klaxon-Mobility GmbH	2025-04-11	2025-03-12	ITI	Physical Medicine	2	Traditional/Hardware
K243260	FUJIFILM Processor EP-8000; FUJIFILM Endoscope Model EG-860R	Fujifilm Corporation	2025-04-11	2024-10-15	FET	Gastroenterology, Urology	2	Traditional/Hardware
DEN240064	CT-132	Click Therapeutics, Inc.	2025-04-11	2024-11-12	SEE	Neurology	2	Traditional/Hardware
K243710	Disposable ureteral access sheath	Shenzhen Trious Medical Technology Co., Ltd.	2025-04-11	2024-12-02	FED	Gastroenterology, Urology	2	Traditional/Hardware
K243857	Flexible Ureterorenoscope (US27F-12-EU; US27F-12-US)	Shanghai AnQing Medical Instrument Co., Ltd.	2025-04-11	2024-12-16	FGB	Gastroenterology, Urology	2	Traditional/Hardware
K250438	CooperSurgical Milex® Pessaries	Coopersurgical Inc.,	2025-04-11	2025-02-14	HHW	Obstetrics/Gynecology	2	Traditional/Hardware
K243346	cobas liat SARS-CoV-2 v2 nucleic acid test	Roche Molecular Systems, Inc.	2025-04-11	2024-10-28	QWR	Microbiology	2	Traditional/Hardware
K250081	Atlantis® Abutments in Titanium	Dentsply Sirona	2025-04-11	2025-01-13	NHA	Dental	2	Traditional/Hardware
K243044	Alma Harmony	Alma Lasers, Inc.	2025-04-11	2024-09-27	GEX	General, Plastic Surgery	2	Traditional/Hardware
K242646	Dental Implant Unit	Guilin Aesthedent Medical Instruments Co., Ltd.	2025-04-11	2024-09-03	EBW	Dental	1	Traditional/Hardware
K243898	Chlorine Sentinel II	Nelson Environmental Technologies, Inc.	2025-04-11	2024-12-19	MSY	Gastroenterology, Urology	2	Traditional/Hardware
K250811	Dental Zirconia Ceramic	Aidite (Qinhuangdao) Technology Co., Ltd.	2025-04-11	2025-03-17	EIH	Dental	2	Traditional/Hardware
K243888	Medline UNITE® REFLEX® Hybrid Nitinol Implant System	Medline Industries, LP	2025-04-11	2024-12-18	JDR	Orthopedic	2	Traditional/Hardware
K242120	OTOPLAN	Cascination AG	2025-04-11	2024-07-19	QQE	Radiology	2	Traditional/Hardware
K243921	LED Curing Lights (DB686 HALO)	Foshan Coxo Medical Instrument Co., Ltd.	2025-04-11	2024-12-20	EBZ	Dental	2	Traditional/Hardware
K242561	Dewin Reproductive Media (Dewin Vitrification Kit, Dewin Thawing Kit)	Donnevie Medical Technology (Shanghai) Co. , Ltd.	2025-04-10	2024-08-28	MQL	Obstetrics/Gynecology	2	Traditional/Hardware
K250371	cryoICE cryoXT cryoablation probe (cryoXT)	AtriCure, Inc.	2025-04-10	2025-02-10	GXH	Neurology	2	Traditional/Hardware
K242045	Initia T3 Acetabular Hemispherical Shell System	Kyocera Medical Technologies, Inc.	2025-04-10	2024-07-12	LPH	Orthopedic	2	Traditional/Hardware
K250058	NEAT 001	Brain Electrophysiology Laboratory Company, LLC	2025-04-10	2025-01-10	OLZ	Neurology	2	Traditional/Hardware
K242928	Tesera-k SC System	Kyocera Medical Technologies, Inc.	2025-04-10	2024-09-24	OVE	Orthopedic	2	Traditional/Hardware
K250009	LED Curing Light (C01-X, C02-X)	Premium Plus (Dongguan) Limited	2025-04-10	2025-01-02	EBZ	Dental	2	Traditional/Hardware
K250389	XNY Disposable Gastric Calibration Tube	Changzhou Xin Neng Yuan Medical Stapler Co.,Ltd	2025-04-10	2025-02-11	KNT	Gastroenterology, Urology	2	Traditional/Hardware
K250112	FitboneTM Trochanteric	Orthofix Srl	2025-04-10	2025-01-16	HSB	Orthopedic	2	Traditional/Hardware
K250486	Skyway Anterior Cervical Plate System	Kyocera Medical Technologies Inc. (KMTI)	2025-04-10	2025-02-19	KWQ	Orthopedic	2	Traditional/Hardware
K242089	Vitrification Freeze Kit (RFD-0101) Vitrification Thaw Kit (RFD-0201, RFD-0202)	Jiangsu Ruifuda Medical Device Co., Ltd.	2025-04-10	2024-07-17	MQL	Obstetrics/Gynecology	2	Traditional/Hardware
K243943	TriMed® Compression Screws	TriMed, Inc.	2025-04-10	2024-12-20	HWC	Orthopedic	2	Traditional/Hardware
K243819	Luminopia	Luminopia, Inc.	2025-04-09	2024-12-12	QQU	Ophthalmic	2	Traditional/Hardware
K243613	Patch-TEA (Model TRI-21)	Transtimulation Research, Inc.	2025-04-09	2024-11-22	NUH	Neurology	2	Traditional/Hardware
K250752	AURORA® Surgiscope® System (ASX15/60); AURORA® Surgiscope® System (ASX15/80)	Integra Lifesciences Corporation	2025-04-09	2025-03-12	GWG	Neurology	2	Traditional/Hardware
DEN240021	Tango® Belt (Model SAS-001-01 (XS); Model SAS-001-02 (S); Model SAS-001-03 (M); Model SAS-001-04 (L); Model SAS-001-05 (XL))	Active Protective Technologies, Inc.	2025-04-09	2024-05-16	SEC	Physical Medicine	2	Traditional/Hardware
K241589	Ceribell Seizure Detection Software	Ceribell, Inc.	2025-04-09	2024-06-03	OMB	Neurology	2	Traditional/Hardware
K243214	Dexcom G7 15 Day Continuous Glucose Monitoring System	Dexcom, Inc.	2025-04-09	2024-10-03	QBJ	Clinical Chemistry	2	Traditional/Hardware
K242429	CentroVena Central Venous Catheter (CVC) with the CentroVena One Insertion System	Becton Dickinson Inc. (Bd)	2025-04-09	2024-08-15	SEF	General Hospital	2	Traditional/Hardware
K243743	autoSCORE (V 2.0.0)	Holberg Eeg AS	2025-04-09	2024-12-04	OMB	Neurology	2	Traditional/Hardware
K250373	ProLift Expandable Spacer System	Life Spine, Inc.	2025-04-09	2025-02-10	MAX	Orthopedic	2	Traditional/Hardware
K250098	Bard Soft Mesh; Bard Soft Mesh Pre-Shaped	Davol, Inc.	2025-04-09	2025-01-14	FTL	General, Plastic Surgery	2	Traditional/Hardware
K243966	FaceHeart Vitals Software Development Kit (FH vitals SDK-RR)	Faceheart Corp.	2025-04-09	2024-12-23	BZQ	Anesthesiology	2	Traditional/Hardware
K250343	LuxCreo Clear Aligner System	Luxcreo, Inc.	2025-04-08	2025-02-06	NXC	Dental	2	Traditional/Hardware
K250708	NPseal	Guard Medical, Inc.	2025-04-08	2025-03-10	OKO	General, Plastic Surgery	2	Traditional/Hardware
K243722	Pre-B Seal Lung Biopsy Plug System - 15cm Model (FG0001); Pre-B Seal Lung Biopsy Plug System - 16cm Model (FG0002); Pre-B Seal Lung Biopsy Plug System - 20cm Model (FG0003)	Selio Medical Limited	2025-04-08	2024-12-03	OMT	General, Plastic Surgery	2	Traditional/Hardware
K250136	Globalcare Blood Pressure Monitor (GUS610)	Globalcare Medical Technology Co., Ltd.	2025-04-08	2025-01-17	DXN	Cardiovascular	2	Traditional/Hardware
K243967	ONE Nitrile Condom	Global Protection Corp.	2025-04-08	2024-12-23	MOL	Obstetrics/Gynecology	2	Traditional/Hardware
K250948	TriMed Fusion Cup System	TriMed, Inc.	2025-04-08	2025-03-21	HRS	Orthopedic	2	Traditional/Hardware
K242151	Radiant Renewal Skincare Wand (HD-44,HD-44A ,HD-44B,HD-44C, HD-69, HD-69A, HD-69B)	Shenzhen Nuon Medical Equipment Co., Ltd.	2025-04-08	2024-07-23	OHS	General, Plastic Surgery	2	Traditional/Hardware
K243027	Disposable Aqueous Humor Collector (SnovoDAHC I-50, SnovoDAHC II-50, SnovoDAHC II-50-27, SnovoDAHC II-100-27)	Hangzhou Sightnovo Medical Technology Co., Ltd.	2025-04-08	2024-09-27	QLY	General Hospital	2	Traditional/Hardware
K243749	Jmoon Conductive Gel	Shenzhen Ulike Smart Electronics Co., Ltd.	2025-04-08	2024-12-05	GYB	Neurology	2	Traditional/Hardware
K243143	E-PEN (E-PEN)	Bomtech Electronics Co., Ltd.	2025-04-07	2024-09-30	QAI	General, Plastic Surgery	2	Traditional/Hardware
K250425	Ultraviolet Phototherapy Device	APK Technology Co., Ltd.	2025-04-07	2025-02-14	FTC	General, Plastic Surgery	2	Traditional/Hardware
K250521	NanoBone® SBX Putty ; NanoBone® QD	Biocomposites, Ltd.	2025-04-07	2025-02-21	MQV	Orthopedic	2	Traditional/Hardware
K250033	Smart Pulse Relief (PZ-2622, PZ-2622T, PZ-2622E)	Guangzhou Pinzhi Medical Technology Co., Ltd.	2025-04-07	2025-01-07	NUH	Neurology	2	Traditional/Hardware
K242385	LED Therapy Mask (MN1, M226)	Shenzhen Borria Technology Co., Ltd.	2025-04-07	2024-08-12	OHS	General, Plastic Surgery	2	Traditional/Hardware
K243567	Tyto Insights for Rhonchi Detection	Tyto Care , Ltd.	2025-04-07	2024-11-18	PHZ	Anesthesiology	2	Traditional/Hardware
K250395	BioBrace ® RC Delivery System	Conmed Corporation	2025-04-07	2025-02-12	ORQ	General, Plastic Surgery	2	Traditional/Hardware
K242116	EyeBOX EBX-4.1	Oculogica, Inc.	2025-04-04	2024-07-19	QEA	Neurology	2	Traditional/Hardware
K242209	UASure II Blood Uric Acid Monitoring System	Apex BioTechnology Corp.	2025-04-04	2024-07-29	PTC	Clinical Chemistry	1	Traditional/Hardware
K242769	VentStar Resus heated (N) (MP17030); VentStar Autobreath heated (N) (MP17031)	Draegerwerk AG & CO Kgaa	2025-04-04	2024-09-13	BTL	Anesthesiology	2	Traditional/Hardware
K250011	Turbett Surgical Instrument Pod (TS1500); Turbett Surgical Instrument Pod (TS1200); Turbett Surgical Instrument Pod (TS1000)	Turbett Surgical	2025-04-04	2025-01-02	FRG	General Hospital	2	Traditional/Hardware
K242001	Philips VSC-MEDlib	Philips Medical Systems Nederland B.V.	2025-04-04	2024-07-09	BZQ	Anesthesiology	2	Traditional/Hardware
K243074	Spectrum Spine Lumbar Cage System	Spectrum Spine, Inc.	2025-04-04	2024-09-27	MAX	Orthopedic	2	Traditional/Hardware
K250706	Passeo-35 Xeo Peripheral Dilatation Catheter; Passeo-18 Peripheral Dilatation Catheters; Passeo-14 Peripheral Dilatation Catheter; Oscar Peripheral Multifunctional Catheter System; Pantera Pro Percutaneous Transluminal Coronary Angioplasty Catheter; Pantera LEO Percutaneous Transluminal Coronary Angioplasty (PTCA) Catheter	Biotronik, Inc.	2025-04-04	2025-03-10	LIT	Cardiovascular	2	Traditional/Hardware
K250667	DeGen Medical Patient Specific Implant (PSI) System	Degen Medical	2025-04-04	2025-03-05	MAX	Orthopedic	2	Traditional/Hardware
K250727	AllTest Multi-Drug Rapid Urine Test Cup; AllTest Multi-Drug Urine Test Cup	Hangzhou AllTest Biotech Co., Ltd.	2025-04-04	2025-03-11	NFT	Clinical Toxicology	2	Traditional/Hardware
K250656	Medical Diode Laser (Models: MZ-GK, MZ-K20, MZ-N75)	Wuhan Pioon Technology Co., Ltd.	2025-04-04	2025-03-05	GEX	General, Plastic Surgery	2	Traditional/Hardware
K243691	LiquID .051 LP Guide Catheter Extension	Seigla Medical, Inc.	2025-04-04	2024-11-26	DQY	Cardiovascular	2	Traditional/Hardware
K242068	LED Light Therapy Mask (RT01)	Ningbo Dechang Electrical Machinery Made Co.,Ltd	2025-04-04	2024-07-15	OLP	General, Plastic Surgery	2	Traditional/Hardware
K242103	TRIOS Ready Tip	3Shape TRIOS A/S	2025-04-04	2024-07-18	NBL	Dental	2	Traditional/Hardware
K243236	WHOOP ECG (electrocardiogram) Feature (1.0)	Whoop., Inc.	2025-04-04	2024-10-10	QDA	Cardiovascular	2	Traditional/Hardware
K243549	JETi Hydrodynamic Thrombectomy System	Abbott Medical	2025-04-04	2024-11-15	QEZ	Cardiovascular	2	Traditional/Hardware
DEN240031	Prapela SVS hospital bassinet pad (model P01)	Prapela, Inc.	2025-04-04	2024-06-17	QVY	General Hospital	2	Traditional/Hardware
K243581	K-Pack Enhance Needle (KH-2713RBBTC and KH-2913RBBTC)	Terumo Europe N.V.	2025-04-04	2024-11-14	FMI	General Hospital	2	Traditional/Hardware
K242576	AllTest Viral Transport Medium	Hangzhou AllTest Biotech Co., Ltd.	2025-04-04	2024-08-29	JSM	Microbiology	1	Traditional/Hardware
K250332	Virage® OCT Spinal Fixation System	Highridge Medical, LLC	2025-04-04	2025-02-05	NKG	Orthopedic	2	Traditional/Hardware
K243786	Bicarby Dialysate RFP-402 (RFP-402-G); Bicarby Dialysate RFP-400 (RFP-400-G); Bicarby Dialysate RFP-407 (RFP-407-G); Bicarby Dialysate RFP-401 (RFP-401-G); Bicarby Dialysate RFP-404 (RFP-404-G); Bicarby Dialysate RFP-456 (RFP-456-G); Ci-Ca Dialysate 2K (RFP-457-G); Ci-Ca Dialysate 4K (RFP-458-G)	Fresenius Medical Care Renal Therapies Group, LLC	2025-04-04	2024-12-09	KPO	Gastroenterology, Urology	2	Traditional/Hardware
K243514	Salvo® Robotic Navigation Instruments	Spine Wave, Inc.	2025-04-03	2024-11-13	OLO	Neurology	2	Traditional/Hardware
K240615	Leos Laser and Endoscopy System	Beaver-Visitec International, Inc.	2025-04-03	2024-03-05	HQF	Ophthalmic	2	Traditional/Hardware
K250658	SureFine Pen Needle	Shina Med Corporation	2025-04-03	2025-03-05	FMI	General Hospital	2	Traditional/Hardware
K243305	Masimo W1	Masimo Corporation	2025-04-03	2024-10-21	DPS	Cardiovascular	2	Traditional/Hardware
K250404	stay_x0095_safe® catheter extension set with Safe- Lock, 12 inch; stay_x0095_safe® catheter extension set with Luer-Lock, 6 inch; stay_x0095_safe® catheter extension set with Luer-Lock, 12 inch; stay_x0095_safe® catheter extension set with Luer-Lock, 18 inch; stay_x0095_safe® to Luer-Lock Adapter, 4 inch	Fresenius Medical Care Renal Therapies Group, LLC	2025-04-03	2025-02-12	KDJ	Gastroenterology, Urology	2	Traditional/Hardware
K243760	OSSIOfiber® Suture Anchor 2.5-3.5 mm	OSSIO , Ltd.	2025-04-03	2024-12-06	MAI	Orthopedic	2	Traditional/Hardware
K243936	StaClear Syringe (SC250AN); StaClear Syringe (SC250LS); StaClear Syringe (SC250LL)	Staclear, Inc.	2025-04-03	2024-12-20	QLY	General Hospital	2	Traditional/Hardware
K242067	VISERA ELITE III VIDEO SYSTEM CENTER OLYMPUS OTV-S700; VISERA ELITE III LED LIGHT SOURCE OLYMPUS CLL-S700; 4K CAMERA HEAD OLYMPUS CH-S700-XZ-EA	Olympus Corporations of the Americas	2025-04-02	2024-07-15	FET	Gastroenterology, Urology	2	Traditional/Hardware
K250705	Sonata Transcervical Fibroid Ablation System 2.2	Gynesonics, Inc.	2025-04-02	2025-03-10	KNF	Obstetrics/Gynecology	2	Traditional/Hardware
K242460	Progenix Select Stim	Progenix, LLC	2025-04-02	2024-08-19	NUH	Neurology	2	Traditional/Hardware
K242115	Plum Duo_x0099_ Precision IV Pump	Icu Medical, Inc.	2025-04-02	2024-07-19	FRN	General Hospital	2	Traditional/Hardware
K250760	SPECTRUM GV Bone Cement	Osteoremedies, LLC	2025-04-02	2025-03-13	LOD	Orthopedic	2	Traditional/Hardware
K242117	LifeShield Infusion Safety Software Suite	Icu Medical, Inc.	2025-04-02	2024-07-19	PHC	General Hospital	2	Traditional/Hardware
K250930	twiist system	Deka Research & Development Corp.	2025-04-02	2025-03-28	QFG	Clinical Chemistry	2	Traditional/Hardware
K243733	SION blue PLUS	Asahi Intecc Co., Ltd.	2025-04-02	2024-12-04	DQX	Cardiovascular	2	Traditional/Hardware
K250152	eufy Wearable Breast Pump S1 (T8D02) Model T8D02; eufy Wearable Breast Pump E10 (T8D03) Model T8D03; eufy Wearable Breast Pump S1 Pro (T8D04) Model T8D04; eufy Wearable Breast Pump E20 (T6060) Model T6060;	Shenzhen TPH Technology Co., Ltd.	2025-04-02	2025-01-21	HGX	Obstetrics/Gynecology	2	Traditional/Hardware
K250613	SnapHammer Hammertoe Correction System	Nvision Biomedical Technologies, Inc.	2025-04-02	2025-02-28	HWC	Orthopedic	2	Traditional/Hardware
K243659	FLASH_x0099_ Facet Fusion Instruments, IsoTis® Facet Fusion Instruments	SeaSpine Orthopedics Corporation	2025-04-02	2024-11-27	OLO	Neurology	2	Traditional/Hardware
K250677	LEGION Total Knee System	Smith & Nephew, Inc.	2025-04-02	2025-03-06	JWH	Orthopedic	2	Traditional/Hardware
K242114	Plum Solo_x0099_ Precision IV Pump	Icu Medical, Inc.	2025-04-02	2024-07-19	FRN	General Hospital	2	Traditional/Hardware
K243889	Remplir (ON-152, 15 x 20 mm); Remplir (ON-203, 20 x 30 mm); Remplir (ON-304, 30 x 40 mm); Remplir (ON-405, 40 x 50 mm)	Orthocell, Ltd.	2025-04-02	2024-12-18	JXI	Neurology	2	Traditional/Hardware
K242113	Nerve Wrap (07-DW-001-TAB)	Biocircuit Technologies, Inc.	2025-04-02	2024-07-19	JXI	Neurology	2	Traditional/Hardware
K242031	Béa Applicator (BAP-GB-01)	Stepone Fertility Ltd (T/A Béa Fertility)	2025-04-02	2024-07-11	HDR	Obstetrics/Gynecology	2	Traditional/Hardware
K242041	STOPWET iontophoresis apparatus (SW01)	Taiwan Medical Electronics Co., Ltd.	2025-04-01	2024-07-12	EGJ	Physical Medicine	2	Traditional/Hardware
K250189	AdvaTx	Advalight Aps	2025-04-01	2025-01-22	GEX	General, Plastic Surgery	2	Traditional/Hardware
K242105	SABA Tampons	Essity Higiene Y Salud Mexico. S.A. DE C.V.	2025-04-01	2024-07-18	HEB	Obstetrics/Gynecology	2	Traditional/Hardware
K250578	Nitrile Examination Gloves Powder Free Tested for Use With Chemotherapy Drugs & Fentanyl Citrate (Blue & Black)	Careglove Global Sdn. Bhd.	2025-04-01	2025-02-27	LZA	General Hospital	1	Traditional/Hardware
K250018	Medical Diode Laser Systems (THEIA808)	Gigaalaser Company , Ltd.	2025-04-01	2025-01-03	GEX	General, Plastic Surgery	2	Traditional/Hardware
K243938	Aristotle 14 Guidewire; Aristotle 18 Guidewire; Aristotle 24 Guidewire; Zoom Wire 14 Guidewire; Aristotle Colossus Guidewire	Scientia Vascular, Inc.	2025-04-01	2024-12-20	MOF	Cardiovascular	2	Traditional/Hardware
K243072	Préime DermaFacial (MicroT)	EMA Aesthetics , Ltd.	2025-04-01	2024-09-27	NFO	Neurology	2	Traditional/Hardware
K242427	da Vinci Xi Surgical System (IS4000); da Vinci X Surgical System (IS4200)	Intuitive Surgical, Inc.	2025-04-01	2024-08-15	NAY	Gastroenterology, Urology	2	Traditional/Hardware
K250663	Niti-S Duodenal Comfort Stent, Niti-S Colonic Comfort Stent	Taewoong Medical Co., Ltd.	2025-03-31	2025-03-05	MUM	General, Plastic Surgery	2	Traditional/Hardware
K250946	Denture Base Resin DT20	Hangzhou SHINING3D Dental Technology Co., Ltd.	2025-03-31	2025-03-28	EBI	Dental	2	Traditional/Hardware
K250263	Disposable Grasping Forceps FG-52D/FG-54D	Olympus Medical Systems Corp.	2025-03-31	2025-01-29	KTI	Ear, Nose, Throat	2	Traditional/Hardware
K243384	Belzer UW® Cold Storage Solution (BTLBUW-001)	Bridge TO Life	2025-03-31	2024-10-31	KDN	Gastroenterology, Urology	2	Traditional/Hardware
K242618	Layer 7-T	Precision Neuroscience, Corp.	2025-03-30	2024-09-03	GYC	Neurology	2	Traditional/Hardware
K250601	Neuro Omega System; NeuroSmart System	Alpha Omega Engineering , Ltd.	2025-03-30	2025-02-28	GZL	Neurology	2	Traditional/Hardware
K250596	Arthrex FiberTak Suture Anchor	Arthrex, Inc.	2025-03-28	2025-02-28	MBI	Orthopedic	2	Traditional/Hardware
K244044	PBC Separator with Selux AST System	Selux Diagnostics, Inc.	2025-03-28	2024-12-30	QZX	Microbiology	2	Traditional/Hardware
K242022	Access Toxo IgG	Beckman Coulter, Inc.	2025-03-28	2024-07-11	LGD	Microbiology	2	Traditional/Hardware
K241927	Synthes Graphic Case & Tray System	Synthes GmbH	2025-03-28	2024-07-01	KCT	General Hospital	2	Traditional/Hardware
DEN240020	Visby Medical Women's Sexual Health Test	Visby Medical, Inc.	2025-03-28	2024-05-13	SEA	Microbiology	2	Traditional/Hardware
K233953	Makani Science_x0099_ Respiration Monitoring System	Makani Science, Inc.	2025-03-28	2023-12-15	BZQ	Anesthesiology	2	Traditional/Hardware
K242952	INNOVANCE Antithrombin	Siemens Healthcare Diagnostic Products GmbH	2025-03-28	2024-09-25	JBQ	Hematology	2	Traditional/Hardware
K250571	CATALYSTEM Femoral Stems	Smith & Nephew, Inc.	2025-03-28	2025-02-26	LZO	Orthopedic	2	Traditional/Hardware
K244030	Needle Stimulator (CMNS6-1 PLUS, CMNS6-3)	Wuxi Jiajian Medical Instrument Co., Ltd.	2025-03-28	2024-12-30	BWK	Unknown	U	Traditional/Hardware
K250558	SelectSite C304 Deflectable Catheter System (C304); C315 Delivery System (C315)	Medtronic, Inc.	2025-03-27	2025-02-25	DQY	Cardiovascular	2	Traditional/Hardware
K241962	Crossloop	Asahi Intecc Co., Ltd.	2025-03-27	2024-07-03	DQX	Cardiovascular	2	Traditional/Hardware
K241862	Levina Pelvic Floor Muscle Stimulator (RS-48)	Zmi Electronics , Ltd.	2025-03-27	2024-06-27	KPI	Gastroenterology, Urology	2	Traditional/Hardware
K242201	HyperSuture White/Green Extension Line	Threadstone, LLC	2025-03-27	2024-07-26	GAT	General, Plastic Surgery	2	Traditional/Hardware
[truncated: 26,075 more rows]

## Sheet: aiml
decision_date	submission_id	device	company	panel	product_code
2025-12-30	K253532	TruSPECT Processing Station	Spectrum Dynamics Medical, Ltd.	Radiology	QIH
2025-12-23	K252379	AIR Recon DL	Ge Medical Systems, LLC	Radiology	LNH
2025-12-23	K253091	ART-Plan+ (v3.1.0)	Therapanacea Sas	Radiology	MUJ
2025-12-22	K252856	PeekMed web	Peek Health, S.A.	Radiology	QIH
2025-12-22	K253664	SKOUT system	Iterative Health	Gastroenterology-Urology	QNP
2025-12-22	K250959	BioticsAI	Bioticsai, Inc.	Radiology	IYN
2025-12-22	K252557	Lumify Diagnostic Ultrasound System	Philips Ultrasound, LLC	Radiology	IYN
2025-12-19	K252670	Alzevita	TOPIA MEDTECH LIMITED	Radiology	QIH
2025-12-19	K252284	eMurmur Heart AI	Csd Labs	Cardiovascular	DQD
2025-12-19	K252838	MAGNETOM Sola; MAGNETOM Altea; MAGNETOM Sola Fit; MAGNETOM Viato.Mobile; MAGNETOM Vida; MAGNETOM Lumina; MAGNETOM Vida Fit; MAGNETOM Flow.Elite; MAGNETOM Flow.Neo; MAGNETOM Flow.Rise	Siemens Healthcare GmbH	Radiology	LNH
2025-12-19	K252029	AI-CVD	HeartLung Corporation	Radiology	QIH
2025-12-18	K250914	MediAI-BA	Crescom Co., Ltd.	Radiology	QIH
2025-12-18	K253516	Assert-IQ (DM5100)	Abbott Medical	Cardiovascular	MXD
2025-12-18	K252235	PVAD IQ Software	Ultrasight , Ltd.	Radiology	QIH
2025-12-17	K251416	UltraSight Guidance	Ultrasight , Ltd.	Radiology	QJU
2025-12-17	K252922	Neosoma Brain Mets	Neosoma, Inc.	Radiology	QIH
2025-12-16	K251763	IRISeg	Intuitive Surgical, Inc.	Radiology	QIH
2025-12-16	K252204	prolaio eVO2peak Module (Version 1.0)	Prolaio, Inc.	Cardiovascular	PPW
2025-12-12	K253489	SwoopÂ® Portable MR ImagingÂ® System	Hyperfine, Inc.	Radiology	LNH
2025-12-11	K252482	CogNet AI-MT+	Medcognetics, Inc.	Radiology	QFM
2025-12-11	K253141	DeepRhythmAI	Medicalgorithmics S.A.	Cardiovascular	DQK
2025-12-10	K252497	SANSA HSAT	Huxley Medical	Anesthesiology	MNR
2025-12-09	K243449	INFINITT DPS	Infinitt Healthcare Co., Ltd.	Pathology	QKQ
2025-12-08	K252294	Fetal EchoScan (v1.2)	Brightheart	Radiology	POK
2025-12-08	K251936	Ceribell Delirium Monitor System	Ceribell, Inc.	Neurology	NCG
2025-12-05	K251657	Personalized Therapy Comfort Settings (PTCS)	ResMed Corp	Anesthesiology	BZD
2025-12-05	K250780	ARTAssistant	Manteia Technologies Co., Ltd.	Radiology	QKB
2025-12-05	K251514	Overjet CBCT Assist	Overjet, Inc.	Radiology	QIH
2025-12-05	K252504	Gastric Alimetry	Alimetry , Ltd.	Gastroenterology-Urology	MYE
2025-12-03	K251203	AVIEW Lung Nodule CAD	Coreline Soft Co.,Ltd	Radiology	OEB
2025-12-02	K252103	Acorn 3D Software (AC-SEG-4009); Acorn 3DP Model (AC-101-XX)	Mighty Oak Medical	Radiology	QIH
2025-12-01	K251370	Cartesion Prime (PCD-1000A/3) V10.21	Canon Medical Systems Corporation	Radiology	KPS
2025-11-28	K252217	CT VScore+	Canon Medical Informatics, Inc.	Radiology	JAK
2025-11-26	K253269	OEC One CFD	Ge Hualun Medical Systems Co. , Ltd.	Radiology	OXO
2025-11-25	K250694	Scaida BrainCT-ICH (v1.0)	Mlhealth 360	Radiology	QAS
2025-11-25	K253310	7600 Ultrasound System (MyLabC25); 7600 Ultrasound System (MyLabC30)	Esaote, S.P.A.	Radiology	IYN
2025-11-24	K252328	Voluson Expert 18; Voluson Expert 20; Voluson Expert 22	Ge Medical Systems Ultrasound and Primary Care Diagnostics	Radiology	IYN
2025-11-24	K252366	a2z-Unified-Triage	A2z Radiology Ai, Inc.	Radiology	QAS
2025-11-21	K251293	CardioVision	Icardio.Ai	Cardiovascular	QUO
2025-11-21	K251506	Nelli (Version 7.11)	Neuro Event Labs OY	Neurology	POS
2025-11-20	K251822	MAGNETOM Free.Max; MAGNETOM Free.Star	Siemens Shenzhen Magnetic Resonance , Ltd.	Radiology	LNH
2025-11-17	K252086	DTX Studio Assist	Nobel Biocare C/O Medicim NV	Radiology	MYN
2025-11-17	K252330	DeepRESP	Nox Medical Ehf	Neurology	OLZ
2025-11-14	K250525	Second OpinionÂ® Panoramic	Pearl, Inc.	Radiology	MYN
2025-11-14	K251078	AutoDensity	Eos Imaging	Radiology	QIH
2025-11-12	K252452	PeekMed web	Peek Health, S.A.	Radiology	QIH
2025-11-07	K250264	SugarBug (1.x)	Bench7, Inc.	Radiology	MYN
2025-11-07	K252041	Fibresolve (with PCCP)	Imvaria, Inc.	Radiology	QWO
2025-11-06	K253265	BriefCase-Triage	Aidoc Medical , Ltd.	Radiology	QAS
2025-11-03	K250330	3mensio Workstation	Pie Medical Imaging BV	Radiology	QIH
2025-11-03	K251532	Acorn 3D Software (AC-SEG-4009); Acorn 3DP Model (AC-101-XX)	Mighty Oak Medical	Radiology	LLZ
2025-10-31	K252074	Aplio i900, Aplio i800 and Aplio i700 Software V9.0 Diagnostic Ultrasound System	Canon Medical Systems Corporation	Radiology	IYN
2025-10-30	K250337	AiORTA - Plan	ViTAA Medical Solutions, Inc.	Radiology	QIH
2025-10-29	K251985	LOGIQ E10	Ge Medical Systems Ultrasound and Primary Care Diagnostics	Radiology	IYN
2025-10-29	K251963	LOGIQ E10s	Ge Medical Systems Ultrasound and Primary Care Diagnostics	Radiology	IYN
2025-10-29	K250882	SANSA HSAT	Huxley Medical	Anesthesiology	MNR
2025-10-27	K251027	cvi42 Coronary Plaque Software Application	Circle Cardiovascular Imaging, Inc.	Radiology	QIH
2025-10-24	K251059	Syngo Carbon Clinicals (VA41)	Siemens Healthineers AG	Radiology	QIH
2025-10-23	K250288	TeraRecon Cardiovascular.Calcification.CT	Terarecon,Inc.	Radiology	QIH
2025-10-22	K252298	ANDI 2.0	Imeka Solutions, Inc.	Radiology	QIH
2025-10-20	K252665	brAInÂ™ Shoulder Positioning	Avatar Medical	Radiology	QIH
2025-10-17	K251673	X9 Ultrasound System	X9, Inc.	Radiology	SGH
2025-10-17	K251355	X1-FFR	Spectrawave, Inc.	Radiology	QHA
2025-10-10	K251602	Alphenix, INFX-8000V/B, INFX-8000V/S, V9.6 with aEvolve Imaging	Canon Medical Systems Corporation	Radiology	OWB
2025-10-10	K251082	HYDROS Robotic System (HY1000); HYDROS Handpiece (HH1000); HYDROS TRUS Probe (HU1000)	Procept Biorobotics	General and Plastic Surgery	PZP
2025-10-09	K251651	EPIQ Series Diagnostic Ultrasound System; Affiniti Series Diagnostic Ultrasound System	Philips Ultrasound, LLC	Radiology	IYN
2025-10-07	K252214	AIAS Cephalon	Metamorphosis GmbH	Radiology	QIH
2025-10-06	K252007	BlineSlide	Deep Breathe, Inc.	Radiology	QIH
2025-10-03	K250662	Bunkerhill MAC	Bunkerhill Health	Radiology	JAK
2025-10-03	K252178	MAGENTIQ-COLO (ME-APDS)	Magentiq Eye, Ltd.	Gastroenterology-Urology	QNP
2025-10-03	K251639	xvision Spine system	Augmedics, Ltd.	Neurology	SBF
2025-10-02	K250766	LungQ 4	Thirona BV	Radiology	JAK
2025-09-29	K250023	SMART PCFD	Disior Ltd	Radiology	QIH
2025-09-29	K252054	SpineAR SNAP (SyncAR Spine)	Surgical Theater, Inc.	Neurology	SBF
2025-09-26	K252105	Ligence Heart	Ligence, UAB	Radiology	QIH
2025-09-25	K252371	uMR 680	Shanghai United Imaging Healthcare Co., Ltd.	Radiology	LNH
2025-09-25	K251527	Brain WMH	Quantib BV	Radiology	QIH
2025-09-23	K251483	SwiftSight-Brain	AIRS Medical Inc.	Radiology	QIH
2025-09-23	K251987	Rapid Aortic Measurements	iSchemaView, Inc.	Radiology	QIH
2025-09-19	K251167	uDR Aurora CX	Shanghai United Imaging Healthcare Co., Ltd.	Radiology	KPR
2025-09-19	K251002	Videa Dental AI	VideaHealth Inc.	Radiology	MYN
2025-09-19	K250649	Bunkerhill ECG-EF	BunkerHill Health	Cardiovascular	QYE
2025-09-18	K250369	Axial3D Insight	Axial Medical Printing Limited	Radiology	QIH
2025-09-17	K251386	ECHELON Synergy	Fujifilm Corporation	Radiology	LNH
2025-09-17	K251221	Assert-IQ (DM5000); Assert-IQ (DM5300); Assert-IQ (DM5500); Merlin.net (MN7000)	Abbott	Cardiovascular	MXD
2025-09-15	K250237	InferOperate Suite	Beijing Infervision Healthcare Medical Technology Co., Ltd.	Radiology	QIH
2025-09-12	K252586	CADDIE	Odin Medical Limited	Gastroenterology-Urology	QNP
2025-09-12	K251518	Volta AF-Xplorer II	Volta Medical	Cardiovascular	DQK
2025-09-12	K251368	FETOLY	Diagnoly	Radiology	IYN
2025-09-11	K251399	SIGNAÂ™ Sprint	GE Medical Systems, LLC	Radiology	LNH
2025-09-11	K250507	Hypertension Notification Feature (HTNF)	Apple Inc.	Cardiovascular	SFR
2025-09-11	K251316	Mazor X System / Mazor X Stealth Edition	Mazor Robotics Ltd.	Neurology	OLO
2025-09-10	K244002	AngioWaveNet	Angiowave Imaging, Inc.	Radiology	QIH
2025-09-09	K251072	Segmentron Viewer	DGNCT, LLC	Radiology	QIH
2025-09-09	K251682	MuscleView 2.0	Springbok, Inc. (dba Springbok Analytics)	Radiology	LNH
2025-09-08	K251931	BioTraceIO Vision (V1.7)	Techsomed Medical Technologies	Radiology	QTZ
2025-09-08	K251610	qER-CTA (v1.0)	Qure.ai Technologies	Radiology	QAS
2025-09-04	K251533	Rapid Obstructive Hydrocephalus, Rapid OH	iSchemaView Inc.	Radiology	QAS
2025-09-04	K250064	Dose+ (1.0)	Mvision AI Oy	Radiology	MUJ
2025-09-04	K251656	Careverse CoronaryDoc (Careverse CoronaryDoc)	Careverse Technology Pte. Ltd.	Radiology	QIH
2025-09-03	K252539	Tempus Pixel	Arterys, Inc.	Radiology	QIH
2025-09-02	K251408	OsteoSightÂ™ Hip (v1)	Naitive Technologies Ltd	Radiology	SAO
2025-09-02	K250753	VELMENI for DENTISTS (V4D)	Velmeni Inc.	Radiology	MYN
2025-08-29	K251106	Sonosite LX and Sonosite PX Ultrasound Systems	Fujifilm Sonosite Inc	Radiology	IYN
2025-08-29	K250003	GENESEEQPRIME NGS Tumor Profiling Assay (FFPE) (GS6005)	Geneseeq Technology Inc.	Pathology	PZM
2025-08-29	K250290	SurgiTwin	Twinsight	Radiology	LLZ
2025-08-29	K243859	PRAEVAortaÂ®2	Nurea	Radiology	QIH
2025-08-28	K250788	Definium Tempo Select	GE Hualun Medical Systems Co., Ltd	Radiology	KPR
2025-08-27	K243687	Vital Signs	Oxehealth Limited	Cardiovascular	QME
2025-08-26	K251983	Brainomix 360 Triage Stroke	Brainomix Limited	Radiology	QAS
2025-08-22	K252362	GBrain MRI	Galileo CDS, Inc	Radiology	QIH
2025-08-22	K243685	MammoScreen BD	Therapixel	Radiology	QIH
2025-08-21	K251029	Vista OS, Vista AI Scan, RTHawk	Vista AI, Inc.	Radiology	LNH
2025-08-20	K251590	Methinks CTA Stroke	Methinks Software S.L.	Radiology	QAS
2025-08-20	K251837	Salix Coronary Plaque (V1.0.0)	Artrya Limited	Radiology	QIH
2025-08-20	K251481	ACUSON Sequoia Diagnostic Ultrasound System; ACUSON Sequoia Select Diagnostic Ultrasound System; ACUSON Origin Diagnostic Ultrasound System; ACUSON Origin ICE Diagnostic Ultrasound System	Siemens Medical Solutions USA, Inc.	Radiology	IYN
2025-08-15	K251747	VEA Align; spineEOS	EOS imaging	Radiology	QIH
2025-08-15	K250818	Nerveblox	Smart Alfa Teknoloji San. Ve Tic. A.S.	Anesthesiology	QRG
2025-08-15	K243851	CHLOE BLAST	Fairtility Ltd.	Obstetrics and Gynecology	PBH
2025-08-12	K250755	DS Core Diagnosis	Dentsply Sirona Inc.	Radiology	QIH
2025-08-12	K251494	Eko Foundation Analysis Software with Transformers (EFAST)	Eko Health, Inc.	Cardiovascular	DQD
2025-08-11	K251873	Saige-Dx	DeepHealth, Inc.	Radiology	QDQ
2025-08-07	K251629	UNiDÂ™ Spine Analyzer	Medicrea International S.A.S. (Medtronic)	Radiology	QIH
2025-08-06	K250569	Cardiologs Holter Platform	Philips France Commercial	Cardiovascular	DPS
2025-08-05	K250246	uMR Jupiter	Shanghai United Imaging Healthcare Co., Ltd.	Radiology	LNH
2025-08-01	K250941	Revolution Vibe	GE Medical Systems, LLC	Radiology	JAK
2025-07-31	K243341	Genius AI Detection 2.0	Hologic, Inc.	Radiology	QDQ
2025-07-31	K250738	YSIO X.pree	Siemens Medical Solutions	Radiology	KPR
2025-07-31	DEN240068	ArteraAI Prostate	Artera Inc.	Pathology	SFH
2025-07-30	K243919	Voxel Dosimetry (00859873006226)	Hermes Medical Solutions AB	Radiology	QIH
2025-07-28	K250652	ECG-AI Low Ejection Fraction (LEF) 12-Lead algorithm (1010)	Anumana, Inc.	Cardiovascular	QYE
2025-07-25	K251322	Venue; Venue Go; Venue Fit; Venue Sprint	GE Medical Systems Ultrasound and Primary care Diagnostics,	Radiology	IYN
2025-07-24	K251455	EPIQ Series Diagnostic Ultrasound System; Affiniti Series Diagnostic Ultrasound System	Philips Ultrasound LLC	Radiology	IYN
2025-07-23	K243681	Neuro Insight V1.0	Olea Medical S.A.S.	Radiology	LLZ
2025-07-22	K250901	Vantage Fortian/Orian 1.5T, MRT-1550, V10.0 with AiCE Reconstruction Processing Unit for MR	Canon Medical Systems Corporation	Radiology	LNH
2025-07-22	K250686	GyriCalc (Version 1.0.0)	NeuroSpectrum Insights Corp.	Radiology	LLZ
2025-07-18	K250902	HeartFlow Analysis	HeartFlow, Inc.	Cardiovascular	PJA
2025-07-18	K250999	V8 Diagnostic Ultrasound System; cV8 Diagnostic Ultrasound System; V7 Diagnostic Ultrasound System; cV7 Diagnostic Ultrasound System; V6 Diagnostic Ultrasound System; cV6 Diagnostic Ultrasound System; V5 Diagnostic Ultrasound System; cV5 Diagnostic Ultrasound System; V4 Diagnostic Ultrasound System; cV4 Diagnostic Ultrasound System	Samsung Medison Co., Ltd.	Radiology	IYN
2025-07-17	K243547	uMR Ultra	Shanghai United Imaging Healthcare Co., Ltd.	Radiology	LNH
2025-07-17	K251839	uMI Panvivo (uMI Panvivo); uMI Panvivo (uMI Panvivo S)	Shanghai United Imaging Healthcare Co., Ltd.	Radiology	KPS
2025-07-16	K243397	uMR 680	Shanghai United Imaging Healthcare Co., Ltd.	Radiology	LNH
2025-07-16	K251151	Rapid CTA 360	iSchemaView	Radiology	QAS
2025-07-16	K251342	EchoPAC Software Only / EchoPAC Plug-in	GE Medical Systems Ultrasound and Primary Care Diagnostics	Radiology	QIH
2025-07-15	K250119	Tempus ECG-Low EF	Tempus AI, Inc.	Cardiovascular	QYE
2025-07-14	K251096	PeekMed web	Peek Health, S.A.	Radiology	QIH
2025-07-14	K250660	LUMINOS Q.namix T; LUMINOS Q.namix R	Siemens Medical Solutions	Radiology	OWB
2025-07-10	K251169	Vivid Pioneer	GE Medical Systems Ultrasound and Primary Care Diagnostics	Radiology	IYN
2025-07-08	K251766	TumorSight Viz	SimBioSys, Inc.	Radiology	QIH
2025-07-07	K243884	TAVIPILOT	Caranx Medical	Radiology	OWB
2025-07-03	K243679	MammoScreenÂ® (4)	Therapixel	Radiology	QDQ
2025-07-03	K251528	syngo.via MI Workflows; Scenium; syngo MBF	Siemens Medical Solutions USA, Inc.	Radiology	QIH
2025-07-01	K250221	StrokeSENS ASPECTS Software Application	Circle Cardiovascular Imaging Inc.	Radiology	POK
2025-07-01	K243779	Bunkerhill Abdominal Aortic Quantification (AAQ)	BunkerHill Health	Radiology	QIH
2025-07-01	K250096	Felix NeuroAI System	Fasikl Incorporated	Neurology	QBC
2025-06-30	K250484	PIUR tUS inside	PIUR Imaging GmbH	Radiology	QIH
2025-06-30	K243647	Synapse PACS (7.5)	FUJIFILM Healthcare Americas Corporation	Radiology	QIH
2025-06-30	K250670	EchoConfidence (USA)	Mycardium AI Limited	Radiology	QIH
2025-06-27	K250984	Maestro System (REF100)	Moon Surgical	Gastroenterology-Urology	QZB
2025-06-27	K243144	X100/X100HT with Full Field Peripheral Blood Smear (PBS) Application	Scopio Labs , Ltd.	Hematology	JOY
2025-06-24	K250268	HyperSnap Surgical System (HSS)	Hypervision Surgical	Gastroenterology-Urology	SFE
2025-06-20	K250877	TMINI Miniature Robotic System	THINK Surgical, Inc.	Neurology	OLO
2025-06-20	K250151	Us2.ca	Eko.Ai Pte Ltd. D/B/A Us2.Ai	Cardiovascular	SDJ
2025-06-19	K250515	EpiMonitor	Empatica Srl	Neurology	POS
2025-06-18	K250886	EPIQ Series Diagnostic Ultrasound Systems; Affiniti Series Diagnostic Ultrasound Systems	Philips Ultrasound LLC	Radiology	IYN
2025-06-18	K243253	6600 Ultrasound System (MyLabA50); 6600 Ultrasound System (MyLabA70)	Esaote S.p.A.	Radiology	IYN
2025-06-18	K243672	CardIQ Suite	GE Medical Systems SCS	Radiology	JAK
2025-06-17	K250440	RT Elements (4.5); (Elements) Multiple Brain Mets SRS; (Elements) Cranial SRS; (Elements) Spine SRS; (Elements) Cranial SRS w/ Cones; (Elements) RT Planning Platform; (Elements) Dose Review; (Elements) Retreatment Review; Elements Segmentation [Cranial , Basal Ganglia, Head & Neck, Pelvic, Spine, Thoracic & Spine, Extracranial] RT; Elements AI Tumor Segmentation RT; Elements SmartBrush [Angio, Sp…	Brainlab AG	Radiology	MUJ
2025-06-16	K250436	MAGNETOM Flow.Ace; MAGNETOM Flow.Plus	Siemens Shenzhen Magnetic Resonance , Ltd.	Radiology	LNH
2025-06-16	K250443	MAGNETOM Avanto Fit; MAGNETOM Skyra Fit; MAGNETOM Sola Fit; MAGNETOM Viato.Mobile	Siemens Healthcare GmbH	Radiology	LNH
2025-06-16	K250685	Methinks NCCT Stroke	Methinks Software S.L.	Radiology	QAS
2025-06-15	K240795	Withings ECG App	Withings	Cardiovascular	QDA
2025-06-13	K243633	Brainlab Elements (7.0); Brainlab Elements Image Fusion (5.0); Brainlab Elements Image Fusion Angio (1.0); Brainlab Elements Contouring (5.0); Brainlab Elements Fibertracking (3.0); Brainlab Elements BOLD MRI Mapping (1.0)	Brainlab AG	Radiology	QIH
2025-06-12	K243234	Second OpinionÂ® CS	Pearl Inc.	Radiology	MYN
2025-06-12	K251153	Aurora	GE Medical Systems Israel	Radiology	KPS
2025-06-10	K250354	Viz Subdural+, Viz SUBDURAL PLUS	Viz.ai, Inc.	Radiology	QIH
2025-06-06	K251009	Cirrus Resting State fMRI Software	Sora Neuroscience, Inc.	Radiology	QIH
2025-06-06	K242737	Empatica Health Monitoring Platform; EmbracePlus; Empatica Care; Care Portal	Empatica S.R.L.	Cardiovascular	MWI
2025-06-05	K251456	BrightHeart View Classifier	BrightHeart	Radiology	QIH
2025-06-05	K243667	Sonic DL	GE Medical Systems, LLC	Radiology	LNH
2025-06-04	K251397	Ingenia, Ingenia CX, Ingenia Elition, Ingenia Ambition, BlueSeal, MR 5300 and MR 7700 MR System	Philips Medical Systems Nederland B.V.	Radiology	LNH
2025-06-04	K243810	TraumaCad Neo (1.1)	Brainlab Ltd.	Radiology	QIH
2025-06-04	K250749	PhysCade System	PhysCade, Inc.	Cardiovascular	DQK
2025-05-30	K243005	AudaxCeph Cephalogram Analysis Software	Audax d.o.o.	Radiology	QIH
2025-05-30	K250236	SwoopÂ® Portable MR ImagingÂ® System (V2)	Hyperfine, Inc.	Radiology	LNH
2025-05-30	K243863	OpulusÂ™ Lymphoma Precision	Roche Molecular Systems, Inc.	Radiology	QIH
2025-05-30	DEN240047	Allix5	Clairity, Inc.	Radiology	SEZ
2025-05-30	K251406	BriefCase-Triage	Aidoc Medical, Ltd.	Radiology	QAS
2025-05-30	K242830	LensHooke X3 PRO Semen Quality Analyzer; LensHooke X3 PRO SE Semen Quality Analyzer	Bonraybio Co., LTD.	Hematology	POV
2025-05-29	K250543	VolusonÂ™ Performance 16; VolusonÂ™ Performance 18	GE Medical Systems Ultrasound and Primary care Diagnostics	Radiology	IYN
2025-05-28	K250367	CoLumboX	Smart Soft Healthcare AD	Radiology	QIH
2025-05-28	K250427	TAIMedImg DeepMets	Taiwan Medical Imaging Co., Ltd.	Radiology	QKB
2025-05-28	K243378	Rapid MLS	iSchemaview Inc.	Radiology	QIH
2025-05-27	K250932	DeepRhythmAI	Medicalgorithmics S.A.	Cardiovascular	DQK
2025-05-23	K243937	Accuro 3S	Rivanna Medical, Inc.	Radiology	IYO
2025-05-23	K242594	DEEPECHO	DeepEcho	Radiology	IYN
2025-05-23	K250005	Clever One	Ewoosoft Co., Ltd	Radiology	QIH
2025-05-23	K243989	Second OpinionÂ® 3D	Pearl, Inc.	Radiology	QIH
2025-05-21	K243793	EPIQ Series Diagnostic Ultrasound System; Affiniti Series Diagnostic Ultrasound System	Philips Ultrasound LLC	Radiology	IYN
2025-05-21	K243762	Synapse 3D Base Tools (V7.0)	FUJIFILM Corporation	Radiology	QIH
2025-05-21	K243866	InVision Precision Cardiac Amyloid	InVision Medical Technology Corporation	Cardiovascular	SDJ
2025-05-21	K243122	uMR Omega	Shanghai United Imaging Healthcare Co., Ltd.	Radiology	LNH
2025-05-21	K251276	SwoopÂ® Portable MR ImagingÂ® System	Hyperfine, Inc.	Radiology	LNH
2025-05-20	K250370	SCENARIA View Phase 5.0	FUJIFILM Corporation	Radiology	JAK
2025-05-16	K243617	uCT ATLAS Astound with uWS-CT-Dual Energy Analysis; uCT ATLAS with uWS-CT-Dual Energy Analysis	Shanghai United Imaging Healthcare Co.,Ltd.	Radiology	JAK
2025-05-16	K241671	6450 Ultrasound System (MyLabE80); 6450 Ultrasound System (MyLabE85)	Esaote S.p.A.	Radiology	IYN
2025-05-16	K250086	OTS Hip	Ortoma AB	Neurology	OLO
2025-05-16	K240554	InferRead Lung CT.AI	Infervision Medical Technology Co., Ltd.	Radiology	OEB
2025-05-14	K242437	Smile DxÂ®	Cube Click, Inc.	Radiology	MYN
2025-05-14	K242624	Medical Image Post-processing Software (uOmnispace.CT)	Shanghai United Imaging Healthcare Co., Ltd.	Radiology	QIH
2025-05-09	K243812	Volta AF-Xplorer	Volta Medical	Cardiovascular	DQK
2025-05-09	K242388	LensHooke X12 PRO Semen Analysis System	Bonraybio Co., LTD.	Hematology	POV
2025-05-09	K251110	EPIQ Series Diagnostic Ultrasound Systems; Affiniti Series Diagnostic Ultrasound Systems	Philips Ultrasound LLC	Radiology	IYN
2025-05-09	K251126	SKOUT system	Iterative Health	Gastroenterology-Urology	QNP
2025-05-09	K243230	Second OpinionÂ® BLE	Pearl Inc.	Radiology	QIH
2025-05-08	K250226	Clarius Median Nerve AI	Clarius Mobile Health Corp.	Radiology	QIH
2025-05-07	K243684	BrightHeart View Classifier	BrightHeart	Radiology	QIH
2025-05-05	K243893	Second OpinionÂ® Pediatric	Pearl, Inc.	Radiology	MYN
2025-05-02	K251071	Fetal EchoScan (v1.1)	BrightHeart	Radiology	POK
2025-05-02	K242583	AT-Patch (ATP-C130/ATP-C70)	ATsens Co.,Ltd.	Cardiovascular	DSH
2025-05-01	K250087	Vscan Air	GE Medical Systems Ultrasound and Primary Care Diagnostics	Radiology	IYN
2025-04-30	P230022	Jewel Patch Wearable Cardioverter Defibrillator (P-WCD) (Jewel), Jewel P-WCD Firmware, Device Accessories Skin Preparati	Element Science, Inc.	Cardiovascular	MVK
2025-04-30	K250328	UltraExtend NX CUW-U001S V2.0 Ultrasound Image Analysis Program	Canon Medical Systems Corporation	Radiology	QIH
2025-04-28	K243376	uAngio AVIVA CX	Shanghai United Imaging Healthcare Co.,Ltd.	Radiology	OWB
2025-04-24	K243239	Lung AI (LAI001)	Exo Inc	Radiology	MYN
2025-04-23	K250831	Annalise Enterprise	Annalise-AI	Radiology	QFM
2025-04-21	K243651	VersaViewer	GE Medical Systems SCS	Radiology	LLZ
2025-04-17	K243878	CLARUS (700)	Carl Zeiss Meditec, Inc.	Ophthalmic	QER
2025-04-17	K242129	VitalRhythm	VitalConnect, Inc.	Cardiovascular	DQK
2025-04-16	K242500	LARALAB	LARALAB GmbH	Radiology	QIH
2025-04-16	K243853	Clarius Prostate AI	Clarius Mobile Health Corp.	Radiology	QIH
2025-04-15	K250650	SpotLight / SpotLight Duo with Low Dose Lung Cancer Screening Option	Arineta Ltd.	Radiology	JAK
2025-04-11	K250416	GBrain MRI	Galileo CDS, Inc	Radiology	QIH
2025-04-11	K243558	Canvas Dx	Cognoa, Inc.	Neurology	QPF
2025-04-11	K242748	Oncospace	Oncospace, Inc.	Radiology	MUJ
2025-04-11	K242600	Second Opinion Periapical Radiolucency Contours	Pearl Inc.	Radiology	MYN
2025-04-10	K243145	syngo.CT LVO Detection	Siemens Medical Solutions USA, Inc.	Radiology	QAS
2025-04-10	K250177	EPIQ Series Diagnostic Ultrasound System; Affiniti Series Diagnostic Ultrasound System	Philips Ultrasound LLC	Radiology	IYN
2025-04-10	K250754	cmAngioÂ® (V1.6)	CureMetrix, Inc.	Radiology	QIH
2025-04-09	K243743	autoSCORE (V 2.0.0)	Holberg EEG AS	Neurology	OMB
2025-04-08	K242295	BunkerHill BMD	BunkerHill Health	Radiology	KGI
2025-04-07	K243567	Tyto Insights for Rhonchi Detection	Tyto Care , Ltd.	Anesthesiology	PHZ
2025-04-04	K242807	HeartFocus (V.1.1.1)	Deski	Radiology	QJU
2025-04-04	K240398	RayStation 2023B, RayPlan 2023B, RayStation 2024A, RayPlan 2024A, RayStation 2024A SP3, RayPlan 2024A SP3	RaySearch Laboratories AB (PUBL)	Radiology	MUJ
2025-04-04	K243769	QFR (3.0)	QFR Solutions bv	Radiology	QHA
2025-04-04	K241982	DeepFoqus (DeepFoqus-Accelerate)	Foqus Technologies Inc.	Radiology	QIH
2025-04-03	K242551	syngo Dynamics (Version VA41D)	Siemens Healthcare GmbH	Radiology	QIH
2025-04-02	K241984	Hi-D Imaging 4TAVR	Hi-D Imaging AG	Radiology	QIH
2025-04-01	K242925	MR Contour DL	GE HealthCare	Radiology	QKB
2025-03-31	K242166	TribusConnect	TribusMed Beheer BV	Radiology	QIH
2025-03-27	K242745	AI-Rad Companion Organs RT	Siemens Healthcare GmbH	Radiology	QKB
2025-03-27	K243038	Salix Central	Artrya Limited	Radiology	QIH
2025-03-27	K242919	V5med Lung AI	V5med Inc.	Radiology	OEB
2025-03-26	K243891	EarliPoint System	EarliTec Diagnostics	Neurology	QPF
2025-03-26	K243831	Rayvolve LN	AZmed	Radiology	MYN
2025-03-21	K243808	Rayvolve PTX-PE	AZmed	Radiology	QFM
2025-03-21	K250186	GoLIF! Lumbar Interbody Fusion System	GetSet Surgical, SA	Orthopedic	MAX
2025-03-20	K241961	Vent Creativity Knee v1.0 (Hermes)	Vent Creativity	Radiology	QIH
2025-03-20	K243292	brAInÂ™ Shoulder Positioning	Avatar Medical	Radiology	LLZ
2025-03-19	K243689	AVIEW	Coreline Soft Co., Ltd.	Radiology	QIH
2025-03-19	K250042	PeekMed web	Peek Health, S.A.	Radiology	QIH
2025-03-18	K242683	QP-ProstateÂ® CAD	Quibim S.L.	Radiology	QDQ
2025-03-17	K243862	LVivo Software Application	DiA Imaging Analysis Ltd.	Radiology	QIH
2025-03-17	K250379	SIGNA Prime Elite	GE Medical Systems, LLC	Radiology	LNH
2025-03-14	K241960	DeepRESP	Nox Medical ehf	Neurology	OLZ
2025-03-14	K242323	Maestro System (REF100)	Moon Surgical	Gastroenterology-Urology	QZB
2025-03-13	K250255	xvision Spine system	Augmedics Ltd.	Neurology	SBF
2025-03-11	K241725	Better Diagnostics Caries Assist (BDCA) Version 1.0	Better Diagnostics AI Corp	Radiology	MYN
2025-03-07	K242338	Cleerly LABS (v2.0)	Cleerly, Inc.	Radiology	QIH
2025-03-06	K243331	LVivo Seamless	DiA Imaging Analysis Ltd.	Radiology	QIH
2025-03-05	K241770	Prostate MR AI (VA10A)	Siemens Healthcare GmbH	Radiology	QDQ
2025-03-04	K243933	Ceevra Reveal 3+	Ceevra, Inc.	Radiology	QIH
2025-03-03	K243235	LVivo Software Application	DiA Imaging Analysis Ltd.	Radiology	QIH
2025-03-03	K243611	JLK-SDH	JLK, Inc.	Radiology	QAS
2025-02-28	K241922	Myomics	Phantomics Inc.	Radiology	QIH
2025-02-28	K242798	Airmod	Heroic Faith International Ltd.	Anesthesiology	BZQ
2025-02-27	K241620	ChestView US	Gleamer SAS	Radiology	MYN
2025-02-26	K241546	aiCockpit AI Viewer	Fovia, Inc.	Radiology	LLZ
2025-02-26	K241222	Ventripoint Medical System Plus (VMS+) 4.0	Ventripoint Diagnostics Ltd.	Radiology	QIH
2025-02-25	K242967	Loss of Pulse Detection	Fitbit	Cardiovascular	SDY
2025-02-25	K243446	3DXR	GE Medical Systems SCS	Radiology	OWB
2025-02-25	K242822	ART-Plan+ (v.3.0.0)	Therapanacea SAS	Radiology	MUJ
2025-02-24	K242994	OncoStudio (OS-01)	OncoSoft. Co., Ltd.	Radiology	QKB
2025-02-21	K242838	QuickRad	Aikenist Technologies Pvt Ltd	Radiology	LLZ
2025-02-21	K242607	ScanDiags Ortho L-Spine MR-Q	ScanDiags AG	Radiology	QIH
2025-02-21	K243614	Sonio Suspect	Sonio	Radiology	POK
2025-02-20	K242821	EFAI Chestsuite XR Malpositioned ETT Assessment System (ETT-XR-100)	Ever Fortune.AI, Co., Ltd.	Radiology	QAS
2025-02-20	K242447	Falcon HST	Compumedics Limited	Neurology	OLV
2025-02-20	K242240	CaRi-Plaque	Caristo Diagnostics Ltd.	Radiology	LLZ
2025-02-14	K250248	BriefCase-Triage	Aidoc Medical, Ltd.	Radiology	QAS
2025-02-14	K243294	Brainomix 360 e-ASPECTS	Brainomix Limited	Radiology	POK
2025-02-14	K243696	AVIEW CAC	Coreline Soft Co., Ltd.	Radiology	QIH
2025-02-12	K243702	V8 Diagnostic Ultrasound System; cV8 Diagnostic Ultrasound System; V7 Diagnostic Ultrasound System; cV7 Diagnostic Ultrasound System; V6 Diagnostic Ultrasound System; cV6 Diagnostic Ultrasound System	Samsung Medison Co., Ltd.	Radiology	IYN
2025-02-12	K243523	NAEOTOM Alpha.Peak/ NAEOTOM Alpha; NAEOTOM Alpha.Pro; NAEOTOM Alpha.Prime	Siemens Medical Solutions USA, Inc.	Radiology	JAK
2025-02-12	K243250	SubtleHD (1.x)	Subtle Medical, Inc.	Radiology	QIH
2025-02-11	K243628	Vivid T9/Vivid T8	GE Medical Systems Ultrasound and Primary Care Diagnostics	Radiology	IYN
2025-02-11	K243620	Vivid iq	GE Medical Systems Ultrasound and Primary Care Diagnostics	Radiology	IYN
2025-02-10	K241659	Ultrasound Workspace (UWS 6.0)	Philips Ultrasound LLC	Radiology	QIH
2025-02-06	K243794	EPIQ Series Diagnostic Ultrasound System; Affiniti Series Diagnostic Ultrasound System	Philips Ultrasound LLC	Radiology	IYN
2025-02-05	K241593	BoneMetrics (US)	Gleamer SAS	Radiology	QIH
2025-02-03	K250035	Contour ProtÃ©gÃ©AI+	MIM Software Inc.	Radiology	QKB
2025-02-03	K243268	TipTraQ (TTQ001)	PranaQ Pte. Ltd.	Anesthesiology	MNR
2025-01-30	K241292	MyShoulder Planner (5.3SSWPL)	Medacta International S.A.	Orthopedic	KWS
2025-01-29	K243042	Co-Ablation System with Sterile Co-Ablation Probe	Hygea Medical Technology Co., Ltd.	General and Plastic Surgery	GEH
2025-01-28	K244027	SANSA HSAT	Huxley Medical	Anesthesiology	MNR
2025-01-27	K243229	Bunkerhill AVC	BunkerHill Health	Radiology	JAK
2025-01-24	K243657	ClearPoint System (Software Version 3.0)	ClearPoint Neuro, Inc.	Neurology	HAW
2025-01-24	K244023	MAGENTIQ-COLO (ME-APDS)	Magentiq Eye LTD	Gastroenterology-Urology	QNP
2025-01-24	K241232	GalenÂ™ Second ReadÂ™	Ibex Medical Analytics Ltd.	Pathology	QPN
2025-01-23	K243158	TeraRecon Aorta.CT (1.1.0)	TeraRecon, Inc.	Radiology	QIH
2025-01-22	K243350	Rapid Neuro3D	iSchemaView, Inc.	Radiology	QIH
2025-01-21	K243955	Precision AI Surgical Planning System (PAI-SPS)	Precision AI Pty Ltd	Orthopedic	QHE
2025-01-17	K242825	Prenuvo Body Composition	Prenuvo	Radiology	LNH
2025-01-17	K242171	TechCare Trauma	Milvue	Radiology	QBS
2025-01-17	K241949	Digital Color Doppler Ultrasound System (P60 Series)	Sonoscape Medical Corp.	Radiology	IYN
2025-01-16	K242522	Second Opinion CC	Pearl Inc.	Radiology	MYN
2025-01-15	K243065	Cardiac Guidance	Caption Health, Inc.	Radiology	QJU
2025-01-14	K241166	uCT 550	Shanghai United Imaging Healthcare Co., Ltd.	Radiology	JAK
2025-01-13	K241200	SpotLight/SpotLight Duo with Low Dose Lung Cancer Screening Option	Arineta Ltd.	Radiology	JAK
2025-01-13	K243950	ARVISÂ® Shoulder	Kico Knee Innovation Company Pty Ltd	Neurology	SBF
2025-01-10	K241009	PeriCALM Patterns 3.0	PeriGen, Inc.	Obstetrics and Gynecology	HGM
2025-01-10	K241891	ScreenDx	Imvaria, Inc	Radiology	QWO
2025-01-10	K241676	TriVerity	Inflammatix, Inc.	Microbiology	PRE
2025-01-07	K243335	Vantage Galan 3T, MRT-3020, V10.0 with AiCE Reconstruction Processing Unit for MR	Canon Medical Systems Corporation	Radiology	LNH
2025-01-07	K241079	uCT 780	Shanghai United Imaging Healthcare Co., Ltd.	Radiology	JAK
2025-01-06	K242488	Soteria E-View	Omega Medical Imaging, LLC	Radiology	JAA
2025-01-06	K243481	TMINI Miniature Robotic System	THINK Surgical, Inc.	Neurology	OLO
2025-01-06	K242123	Brainomix 360 e-CTA	Brainomix Limited	Radiology	LLZ
2025-01-03	K241350	Clarify DL	GE Medical Systems Israel, Functional Imaging	Radiology	LLZ
2025-01-03	K243363	JLK-ICH	JLK, Inc.	Radiology	QAS
2025-01-02	K241696	Ortho AI	Ortho AI LLC	Radiology	QIH
2025-01-02	K242334	Ezra Flash	Ezra AI, Inc.	Radiology	QIH
2024-12-27	K242480	FLASH EVD System (10-0002)	7D Surgical ULC	Neurology	HAW
2024-12-23	K242403	Aquilion ONE (TSX-308A/3) V1.5	Canon Medical Systems Corporation	Radiology	JAK
2024-12-20	K242168	Voluson Expert 18; Voluson Expert 20; Voluson Expert 22	GE Medical Systems Ultrasound and Primary care Diagnostics	Radiology	IYN
2024-12-20	K242362	Lightning Viewer	Nexsys Electronics Inc. dba Medweb	Radiology	LLZ
2024-12-19	K243705	Saige-Density (2.5.0)	DeepHealth, Inc	Radiology	QIH
2024-12-19	K242270	OrthoNext Platform System	Orthofix Srl	Radiology	QIH
2024-12-19	K242467	IQ-UIP	Imbio, Inc.	Radiology	QWO
2024-12-19	K243688	Saige-Dx (3.1.0)	DeepHealth, Inc.	Radiology	QDQ
2024-12-16	K240793	MSKai	MSKai	Radiology	QIH
2024-12-12	K242020	EPIQ Series Diagnostic Ultrasound System; Affiniti Series Diagnostic Ultrasound System	Philips Ultrasound LLC	Radiology	IYN
2024-12-12	K243538	uMI Panvivo (uMI Panvivo); uMI Panvivo (uMI Panvivo S)	Shanghai United Imaging Healthcare Co.,Ltd.	Radiology	KPS
2024-12-11	K243548	BriefCase-Triage	Aidoc Medical, Ltd.	Radiology	QFM
2024-12-10	K242461	IRISeg	Intuitive Surgical Inc.	Radiology	QIH
2024-12-10	K242511	V5 Diagnostic Ultrasound System, H5 Diagnostic Ultrasound System, XV5 Diagnostic Ultrasound System, XH5 Diagnostic Ultrasound System, V4 Diagnostic Ultrasound System, H4 Diagnostic Ultrasound System, XV4 Diagnostic Ultrasound System, XH4 Diagnostic Ultrasound System	Samsung Medison Co., Ltd.	Radiology	IYN
2024-12-09	K242729	AutoContour (Model RADAC V4)	Radformation, Inc.	Radiology	QKB
2024-12-06	K241543	DrAidÂ™ for Liver Segmentation	VinBrain Joint Stock Company	Radiology	QIH
2024-12-06	K241923	EFAI Neurosuite CT Midline Shift Assessment System (MLS-CT-100)	Ever Fortune.AI, Co., Ltd.	Radiology	QAS
2024-12-06	K240680	CDM Insights	Oxford Brain Diagnostics Ltd	Radiology	QIH
2024-12-06	K240926	PeekMed web	Peek Health, S.A.	Radiology	LLZ
2024-12-04	K241197	DeepRhythmAI	Medicalgorithmics S.A.	Cardiovascular	DQK
2024-12-03	K242188	ClearRead CT CAC	Riverain Technologies, Inc.	Radiology	JAK
2024-11-27	K240645	Sonix Health	Ontact Health Co., Ltd	Radiology	QIH
2024-11-27	K242444	HERA W10 Diagnostic Ultrasound System; HERA W9 Diagnostic Ultrasound System	Samsung Medison Co., Ltd.	Radiology	IYN
2024-11-26	K241390	NeuroMatch	LVIS Corporation	Neurology	OMB
2024-11-25	K241831	Transpara (2.1.0)	ScreenPoint Medical B.V.	Radiology	QDQ
2024-11-22	K242203	BriefCase-Quantification	Aidoc Medical, Ltd.	Radiology	QIH
2024-11-22	K242094	Dreem 3S	Beacon Biosignals, Inc.	Neurology	OLZ
2024-11-20	K242359	Strain AI (SAI001)	Exo Inc	Radiology	QIH
2024-11-19	K242523	ACUSON Sequoia Diagnostic Ultrasound System; ACUSON Sequoia Select Diagnostic Ultrasound System; ACUSON Origin Diagnostic Ultrasound System; ACUSON Origin ICE Diagnostic Ultrasound System	Siemens Medical Solutions USA, Inc.	Radiology	IYN
2024-11-18	K241633	Informed Vital Core Application (IVC App)	Mindset Medical, Inc.	Cardiovascular	QME
2024-11-18	K241747	Saige-Dx	DeepHealth, Inc	Radiology	QDQ
2024-11-15	K242130	Koios DS	Koios Medical, Inc.	Radiology	POK
2024-11-15	K241439	VUNO Med-Chest X-ray Triage/VUNO Med-CXR Link Triage	Vuno Inc.	Radiology	QFM
2024-11-15	K242800	The 5000 Compact Series Ultrasound Systems	Philips Ultrasound LLC	Radiology	IYN
2024-11-15	K242062	1CMR Pro	Mycardium AI Limited	Radiology	LLZ
2024-11-15	K240860	EchoGo Amyloidosis (1.0)	Ultromics Limited	Cardiovascular	SDJ
2024-11-14	K242342	Fetal EchoScan	BrightHeart	Radiology	POK
2024-11-08	K240417	ProFound Detection (V4.0)	iCAD, Inc.	Radiology	QDQ
2024-11-07	K241719	NeuroICH	Neurocareai Inc.	Radiology	QAS
2024-11-07	K240712	icobrain aria	icometrix NV	Radiology	QBS
2024-11-05	K241312	TeraRecon Cardiac.Chambers.MR (1.0.0)	TeraRecon,Inc.	Radiology	QIH
2024-10-30	K241108	RemedyLogic AI MRI Lumbar Spine Reader	Remedy Logic Inc.	Radiology	QIH
2024-10-25	K243189	TumorSight Viz	SimBioSys, Inc.	Radiology	QIH
2024-10-25	K242215	Neurophet AQUA (V3.1)	Neurophet, Inc.	Radiology	QIH
2024-10-22	K243209	nordicMEDiVA	NordicNeurolab AS	Radiology	LLZ
2024-10-18	K241490	Contour+ (MVision AI Segmentation)	MVision AI Oy	Radiology	QKB
2024-10-18	K242837	BriefCase-Triage	Aidoc Medical, Ltd.	Radiology	QAS
2024-10-17	K241242	SIGNA MAGNUS	GE Medical Systems, LLC	Radiology	LNH
2024-10-17	K240408	REMI-AI Rapid Detection Module (REMI-AI RDM)	Epitel, Inc	Neurology	OMB
2024-10-16	K241481	xvision Spine System	Augmedics Ltd.	Neurology	SBF
2024-10-15	K242781	cvi42 Software Application	Circle Cardiovascular Imaging Inc.	Radiology	QIH
2024-10-11	K241971	HERA Z20, R20, HERA Z30, R30 Diagnostic Ultrasound System	Samsung Medison Co., Ltd.	Radiology	IYN
2024-10-10	K241430	EchoMeasure	iCardio.ai	Radiology	QIH
2024-10-09	K241837	Limbus Contour	Limbus AI Inc.	Radiology	QKB
2024-10-07	K240980	EPIQ Series Diagnostic Ultrasound System	Philips Ultrasound LLC	Radiology	IYN
2024-10-07	K241029	SpineUsÂ™ System	Verdure Imaging	Radiology	IYO
2024-10-04	K242652	Lunit INSIGHT DBT v1.1	Lunit Inc.	Radiology	QDQ
2024-10-04	K241245	EchoSolv AS	Echo IQ Ltd	Radiology	POK
2024-10-04	K240553	LVivo Software Application	DiA Imaging Analysis Ltd.	Radiology	QIH
2024-10-02	K242005	Versana Premier; Versana Premier Lotus; LOGIQ F	GE Medical Systems Ultrasound and Primary Care Diagnostics	Radiology	IYN
2024-10-02	K241561	MammoScreen BD	Therapixel	Radiology	QIH
2024-10-01	K240943	LungVision	BodyVision Medical Ltd.	Radiology	QIH
2024-10-01	K241331	MuscleView	Springbok, Inc.	Radiology	LNH
2024-09-27	K240993	encevis (2.1)	AIT Austrian Institute of Technology GmbH	Neurology	OMB
2024-09-27	K240369	CAC (gated) Algorithm	BunkerHill Health	Radiology	JAK
2024-09-27	K241480	JBS-LVO	JLK, Inc.	Radiology	QAS
2024-09-24	K242292	uAI Easy Triage ICH	Shanghai United Imaging Intelligence Co., Ltd.	Radiology	QAS
2024-09-23	K240013	EchoGo Heart Failure (2.0)	Ultromics Limited	Cardiovascular	QUO
2024-09-23	P140011/S008	MAMMOMAT B.brilliant with Tomosynthesis Option	SIEMENS MEDICAL SOLUTIONS USA, INC.	Radiology	OTE
2024-09-20	K240036	PIUR tUS Infinity	PIUR Imaging GmbH	Radiology	QIH
2024-09-13	K240929	Sleep Apnea Notification Feature (SANF)	Apple Inc.	Anesthesiology	QZW
2024-09-12	K241280	Constellation (CON-001)	Q Bio, Inc.	Radiology	QIH
2024-09-12	K240942	CINA-CSpine	Avicenna.AI	Radiology	QAS
2024-09-12	K241582	Aplio i900/i800/i700 Diagnostic Ultrasound System, Software V7.0 (TUS-AI900, TUS-AI800, TUS-AI700)	Canon Medical Systems Corporation	Radiology	IYN
2024-09-11	K241380	FETOLY-HEART	Diagnoly	Radiology	IYN
2024-09-10	K240094	LumiNE US; Lumi	Augmedit B.V.	Radiology	QIH
2024-09-09	K240791	ADAS 3D	Adas3D Medical S.L	Radiology	QIH
2024-09-09	K241681	Overjet Image Enhancement Assist	Overjet Inc	Radiology	QIH
2024-09-09	K240697	See-Mode Augmented Reporting Tool, Thyroid (SMART-T)	See-Mode Technologies Pte. Ltd.	Radiology	QDQ
2024-09-06	K240411	uAI Portal	Shanghai United Imaging Intelligence Co., Ltd.	Radiology	QIH
2024-09-05	K233998	TRAQinform IQ	AIQ Global, Inc.	Radiology	LLZ
2024-09-04	K233977	Velacur	Sonic Incytes	Radiology	IYO
2024-08-30	K240003	Velmeni for Dentists (V4D)	Velmeni Inc.	Radiology	MYN
2024-08-30	K241847	Imbio PHA (4.0.0)	Imbio, Inc	Radiology	QIH
2024-08-30	K241585	uMI Panorama	Shanghai United Imaging Healthcare Co.,Ltd.	Radiology	KPS
2024-08-30	K242300	MI View&GO	Siemens Medical Solutions USA, Inc.	Radiology	QIH
2024-08-30	K242275	syngo.via MI Workflows; Scenium; syngo MBF	Siemens Medical Solutions USA, Inc.	Radiology	QIH
2024-08-29	K233826	Kosmos	EchoNous, Inc.	Radiology	IYN
2024-08-27	K241684	Overjet Charting Assist	Overjet, Inc	Radiology	QIH
2024-08-22	K241098	NeuroQuant	CorTechs Labs, Inc.	Radiology	QIH
2024-08-21	K240290	AiMIFY (1.x)	Subtle Medical, Inc.	Radiology	LLZ
2024-08-20	K241496	Vantage Galan 3T, MRT-3020, V10.0 with AiCE Reconstruction Processing Unit for MR	Canon Medical Systems Corporation	Radiology	LNH
2024-08-20	K240200	HYDROS Robotic System; HYDROS TRUS Probe; HYDROS Handpiece	Procept BioRobotics	General and Plastic Surgery	PZP
2024-08-19	K241440	HealthCCSng	Nano-X AI Ltd.	Radiology	JAK
2024-08-16	K240740	qCT LN Quant	Qure.ai Technologies	Radiology	QIH
2024-08-16	K233755	HeartKeyÂ® Rhythm	B-Secur Limited	Cardiovascular	DQK
2024-08-15	K241596	uMI Panvivo	Shanghai United Imaging Healthcare Co., Ltd.	Radiology	KPS
2024-08-15	K241211	CoLumbo	Smart Soft Healthcare	Radiology	QIH
2024-08-13	K241429	ECHELON Synergy MRI System	FUJIFILM Healthcare Corporation	Radiology	LNH
2024-08-12	K242054	OptimMRI (v2)	Rebrain, SAS	Radiology	QIH
2024-08-08	K233822	i2Contour	MRIMath LLC	Radiology	QIH
2024-08-08	K241665	Omni Legend	GE Medical Systems Israel, Functional Imaging	Radiology	KPS
2024-08-05	K233992	Precision AI Surgical Planning System (PAI-SPS)	Precision AI Pty Ltd	Orthopedic	QHE
2024-08-05	K240953	AI Platform 2.0 (AIP002)	Exo Imaging	Radiology	QIH
2024-08-02	K233984	Acumen Assisted Fluid Management (AFM) Software Feature	Edwards Lifesciences, LLC	Cardiovascular	QMS
2024-08-01	K234141	AISAP Cardio V1.0	Aisap	Radiology	POK
2024-08-01	K233731	CardIQ Suite	GE Medical Systems SCS	Radiology	JAK
2024-08-01	K240301	MammoScreenÂ® (3)	Therapixel	Radiology	QDQ
2024-07-25	K241887	GI GeniusÂ™ Module 100 (GGM100.US); GI GeniusÂ™ Module 200 (GGM200.US); ColonPROÂ™ 4.0 (CPRO40.US); GI GeniusÂ™ Module 300 (GGM300-US); ColonPROÂ™ 4.0 (CPRO40S-US)	Cosmo Artificial Intelligence - AI Ltd	Gastroenterology-Urology	QNP
2024-07-24	K240044	CADDIE	Odin Medical Limited	Gastroenterology-Urology	QNP
2024-07-22	K240704	ACUSON Sequoia Diagnostic Ultrasound System, ACUSON Sequoia Select Diagnostic Ultrasound System, ACUSON Origin Diagnostic Ultrasound System, ACUSON Origin ICE Diagnostic Ultrasound System	Siemens Medical Solutions, USA, Inc.	Radiology	IYN
2024-07-17	K240845	Rayvolve	AZmed SAS	Radiology	QBS
2024-07-17	K241121	MICSI-RMT	Microstructure Imaging, Inc.	Radiology	LLZ
2024-07-16	K240944	SwoopÂ® Portable MR ImagingÂ® System	Hyperfine, Inc.	Radiology	LNH
2024-07-15	K240285	Huxley SANSA Home Sleep Apnea Test (1000-00)	Huxley Medical	Anesthesiology	MNR
2024-07-12	K234009	Acorn 3D Software (AC-SEG-4009); Acorn 3DP Model (AC-101-XX)	Mighty Oak Medical	Radiology	QIH
2024-07-12	K233457	RUS	Hutom Inc.	Radiology	QIH
2024-07-12	K241727	BriefCase-Triage	Aidoc Medical, Ltd.	Radiology	QAS
2024-07-11	K241329	SubtleSYNTH (1.x)	Subtle Medical, Inc.	Radiology	QIH
2024-07-03	K241508	SKOUTÂ® system	Iterative Scopes, Inc.	Gastroenterology-Urology	QNP
2024-07-02	K240736	SMART Bun-Yo-Matic X-Ray	Disior Ltd	Radiology	QIH
2024-07-02	K240555	Tyto Insights for Crackles Detection	Tyto Care Ltd.	Anesthesiology	PHZ
2024-07-01	K240353	Hyper Insight - ICH	SK Inc.	Radiology	QAS
2024-06-25	K240582	VEA Align; spineEOS	EOS imaging	Radiology	QIH
2024-06-21	K233253	eCARTv5 Clinical Deterioration Suite (Â“eCARTÂ”)	AgileMD, Inc.	Cardiovascular	QNL
2024-06-21	K240631	V8/XV8/XH8, V7/XV7/XH7, V6/XV6/XH6 Diagnostic Ultrasound System	Samsung Medison Co., Ltd.	Radiology	IYN
2024-06-21	K240465	O-arm O2 Imaging System	Medtronic Navigation, Inc	Radiology	OWB
2024-06-21	K233196	Medihub Prostate	JLK Inc.	Radiology	QIH
2024-06-21	K233549	Tempus ECG-AF	Tempus AI, Inc.	Cardiovascular	SBQ
2024-06-20	K240642	SMART Bun-Yo-Matic CT	Disior Ltd	Radiology	QIH
2024-06-14	K241083	SIS System	Surgical Information Sciences, Inc.	Radiology	QIH
2024-06-14	K233955	Clarius OB AI	Clarius Mobile Health Corp.	Radiology	IYN
2024-06-13	K233662	Radiography 7300 C	Philips Medical Systems DMC GmbH	Radiology	KPR
2024-06-13	K233925	Relu Creator	Relu BV	Radiology	QIH
2024-06-12	K240516	RS85 Diagnostic Ultrasound System	Samsung Medison Co., Ltd.	Radiology	IYN
2024-06-07	K232035	Impala	AliveCor, Inc.	Cardiovascular	DPS
2024-06-07	K231010	Corvair	AliveCor, Inc.	Cardiovascular	MHX
2024-06-07	K241038	Cardiac CT Function Software Application	Circle Cardiovascular Imaging	Radiology	QIH
2024-06-07	K234042	EFAI Bonesuite XR Bone Age Pro Assessment System (BAP-XR-100)	Ever Fortune.AI Co., Ltd.	Radiology	QIH
2024-05-31	K240612	CINA-VCF	Avicenna.AI	Radiology	QFM
2024-05-24	K234154	uPMR 790	Shanghai United Imaging Healthcare Co., Ltd.	Radiology	OUO
2024-05-24	K240769	LVivo IQS	DiA Imaging Analysis Ltd.	Radiology	QIH
2024-05-23	K240294	Syngo Carbon Enterprise Access (VA40A)	Siemens Healthcare GmbH	Radiology	LLZ
2024-05-23	K233108	VinDr-Mammo	VinBigData Joint Stock Company	Radiology	QFM
2024-05-21	K233543	YSIO X.pree	Siemens Medical Solutions	Radiology	KPR
2024-05-17	DEN230035	DentalMonitoring	Dental Monitoring SAS	Dental	SBC
2024-05-17	K233209	uOmnispace.CT	Shanghai United Imaging Healthcare Co., Ltd.	Radiology	QIH
2024-05-16	K233625	RAYDENT SW	RAY Co., Ltd.	Dental	PNN
2024-05-15	K233247	Heuron ICH	Heuron Co., Ltd.	Radiology	QAS
2024-05-15	K241112	BriefCase-Quantification	Aidoc Medical, Ltd.	Radiology	QIH
2024-05-15	DEN230043	Notal Vision Home Optical Coherence Tomography (OCT) System	Notal Vision Inc	Ophthalmic	SAX
2024-05-10	K232410	SmartChest	Milvue	Radiology	QFM
2024-05-07	K233864	ASSURE Wearable ECG	Kestra Medical Technologies, Inc.	Cardiovascular	MWJ
2024-05-07	K232928	DeepContour (V1.0)	Wisdom Technologies., Inc.	Radiology	QKB
2024-05-03	K233687	ECHELON Synergy V10.0	Fujifilm Healthcare Americas Corporation	Radiology	LNH
2024-05-03	K232416	AUTION EYE AI-4510 Urine Particle Analysis System	Arkray Inc.	Hematology	LKM
2024-05-03	K232491	CT 5300	Philips Healthcare (Suzhou) Co., Ltd.	Radiology	JAK
2024-04-30	K232923	Ethos Treatment Management (3.0); Ethos Treatment Planning (2.0)	Varian Medical Systems Inc.	Radiology	IYE
2024-04-29	K240062	ARVISÂ® Shoulder	Insight Medical Systems, Inc.	Neurology	OLO
2024-04-26	K232799	syngo.via RT Image Suite	Siemens Medical Solutions USA, Inc.	Radiology	MUJ
2024-04-26	K240406	Sonio Detect	Sonio	Radiology	IYN
2024-04-26	K233673	uMR Jupiter	Shanghai United Imaging Healthcare Co., Ltd	Radiology	LNH
2024-04-25	K232331	InVision Precision LVEF (LVEF)	InVision Medical Technology Corporation	Radiology	QIH
2024-04-24	K240850	EPIQ Series Diagnostic Ultrasound Systems; Affiniti Series Diagnostic Ultrasound Systems	Philips Ultrasound LLC	Radiology	IYN
2024-04-23	K240058	AEYE-DS	AEYE Health Inc.	Ophthalmic	PIB
2024-04-22	K234068	ART-Plan (v.2.2.0)	Therapanacea SAS	Radiology	MUJ
2024-04-22	K233582	Rapid	iSchema View Inc.	Radiology	LLZ
2024-04-19	K240781	SKOUTÂ® system	Iterative Scopes, Inc.	Gastroenterology-Urology	QNP
2024-04-17	K233186	uOmnispace.MR	Shanghai United Imaging Healthcare Co., Ltd.	Radiology	QIH
2024-04-15	K240773	VisAble.IO	Techsomed	Radiology	QTZ
2024-04-12	K240238	Vantage Fortian/Orian 1.5T, MRT-1550, V9.0 with AiCE Reconstruction Processing Unit for MR	Canon Medical Systems Corporation	Radiology	LNH
2024-04-11	K233698	True Enhance DL	GE Healthcare Japan Corporation	Radiology	JAK
2024-04-10	K240744	uMR 680	Shanghai United Imaging Healthcare Co., Ltd.	Radiology	LNH
2024-04-09	DEN230023	Rho	16 Bit Inc	Radiology	SAO
2024-04-08	K240291	EFAI CARDIOSUITE CTA ACUTE AORTIC SYNDROME ASSESSMENT SYSTEM	Ever Fortune.AI, Co., Ltd.	Radiology	QAS
2024-04-05	K233666	CorVista System with PH Add-On	Analytics for Life, Inc.	Cardiovascular	SAT
2024-04-05	K233249	APPRAISE-HRI	The Surgeon General, Department of the Army (TSG-DA)	Cardiovascular	SAR
2024-04-04	K240172	Preview Shoulder	Genesis Software Innovations	Radiology	QIH
2024-04-03	K232899	AI-Rad Companion Organs RT	Siemens Medical Solutions U.S.A.	Radiology	QKB
2024-04-03	K233618	Oxevision Sleep Device	Oxehealth Limited	Neurology	LEL
2024-04-02	DEN230036	Sepsis ImmunoScore	Prenosis, Inc.	General Hospital	SAK
2024-04-02	K232835	Aquilion ONE (TSX-308A/3) V1.4 with PIQE Reconstruction System	Canon Medical Systems Corporation	Radiology	JAK
2024-04-01	K233676	Us2.v2	Eko.ai Pte. Ltd d/b/a Us2.ai	Radiology	QIH
2024-03-29	K233211	AVIEW CAC	Coreline Soft Co., Ltd.	Radiology	QIH
2024-03-28	K233657	NAEOTOM Alpha	Siemens Medical Solutions USA, Inc.	Radiology	JAK
2024-03-28	K233409	Eko Low Ejection Fraction Tool (ELEFT)	Eko Health, Inc.	Cardiovascular	QYE
2024-03-26	K233650	SOMATOM go.Up; SOMATOM go.Now; SOMATOM go.All; SOMATOM go.Top; SOMATOM go.Sim; SOMATOM go.Open Pro; SOMATOM X.cite; SOMATOM X.ceed	Siemens Medical Solutions USA, Inc.	Radiology	JAK
2024-03-22	K232322	MAGNETOM Terra; MAGNETOM Terra.X	Siemens Medical Solutions USA, Inc.	Radiology	LNH
2024-03-22	K232431	syngo.CT Brain Hemorrhage	Siemens Medical Solutions USA, Inc.	Radiology	QAS
2024-03-22	K240540	uMR Omega	Shanghai United Imaging Healthcare Co., Ltd.	Radiology	LNH
2024-03-21	K233753	AI-Rad Companion (Pulmonary)	Siemens Healthcare GmbH	Radiology	JAK
2024-03-20	K234047	Automatic Registration	Brainlab AG	Neurology	OLO
2024-03-15	K233342	CINA-ASPECTS	Avicenna.AI	Radiology	POK
2024-03-13	K233968	CINA-iPE	Avicenna.AI	Radiology	QAS
2024-03-11	K232140	OTS Hip	Ortoma AB	Neurology	OLO
2024-03-08	K233438	SleepStageML	Beacon Biosignals, Inc.	Neurology	OLZ
2024-03-07	K233692	Voluson Signature 20, Voluson Signature 18	GE Medical Systems Ultrasound and Primary care Diagnostics,	Radiology	IYN
2024-03-06	K231677	EdgeFlow UH10	Edgecare Inc.	Radiology	IYO
2024-03-04	K233738	Overjet Caries Assist-Pediatric	Overjet, Inc	Radiology	MYN
2024-03-01	K233030	BoneMRI	MRIguidance B.V	Radiology	QIH
2024-03-01	K231690	iCAS-LV	HighRAD Ltd.	Radiology	QIH
2024-02-29	K232765	MAGNETOM Cima.X Fit	Siemens Medical Solutions USA, Inc.	Radiology	LNH
2024-02-29	K231683	inHEART Models	inHEART, SAS	Radiology	QIH
2024-02-28	K232613	CT Cardiomegaly	Innolitics, LLC	Radiology	QIH
2024-02-23	K233590	Overjet Charting Assist	Overjet, Inc	Radiology	QIH
2024-02-22	K233749	Revolution Ascend Sliding	GE Hangwei Medical Systems Co., Ltd.	Radiology	JAK
2024-02-21	K232148	X-Guide Surgical Navigation System	X-Nav Technologies, LLC	Dental	QRY
2024-02-15	K232915	EpiMonitor	Empatica Srl	Neurology	POS
2024-02-13	K233788	EPIQ Series Diagnostic Ultrasound System, Affiniti Series Diagnostic Ultrasound System	Philips Ultrasound LLC	Radiology	IYN
2024-02-13	K231855	QOCAÂ® image Smart RT Contouring System	Quanta Computer Inc.	Radiology	QKB
2024-02-09	K231355	Aurora	EnsoData	Anesthesiology	MNR
2024-02-08	K233080	HealthFLD	Nano-X AI Ltd.	Radiology	JAK
2024-02-06	DEN230041	Sleep Apnea Feature	Samsung Electronics Co., Ltd	Anesthesiology	QZW
2024-02-05	K232363	Viz HDS, Viz Volume Plus, Viz ICH+	Viz.ai, Inc.	Radiology	QIH
2024-01-31	DEN210035	Â“GeniusÂ™ Digital Diagnostics System with the GeniusÂ™ Cervical AI algorithmÂ”	Hologic Inc.	Pathology	QYV
2024-01-31	K231396	CEPHX- Cephalometric Analysis Software	Orca Dental AI LTD	Radiology	LLZ
2024-01-24	K233195	Aplio i900, Aplio i800 and Aplio i700 Software V8.1 Diagnostic Ultrasound System	Canon Medical Systems Corporation	Radiology	IYN
2024-01-19	K233728	SIGNA Champion	GE Healthcare (Tianjin) Company Limited	Radiology	LNH
2024-01-19	K232156	Rapid ASPECTS (v3)	iSchemaView, Inc.	Radiology	POK
2024-01-18	K232698	NemoScan	Software Nemotec S.L.	Radiology	QIH
2024-01-17	K231871	Radify Triage	Envisionit DeepAI Ltd	Radiology	QFM
2024-01-16	K233512	Rapid (6.0)	iSchemaView, Inc.	Radiology	QIH
2024-01-13	K233216	CLEWICU System	Clew Medical Ltd.	Cardiovascular	QNL
2024-01-12	K233677	Biograph VK10	Siemens Medical Solutions USA, Inc.	Radiology	KPS
2024-01-12	K233964	GI GeniusÂ™ Module 100 (GGM100.US); GI GeniusÂ™ Module 200 (GGM200.US); ColonPROÂ™ 4.0 (CPRO40.US)	Cosmo Artificial Intelligence - AI Ltd	Gastroenterology-Urology	QNP
2024-01-12	DEN230008	DermaSensor	DermaSensor Inc.	General and Plastic Surgery	QZS
2024-01-12	DEN220040	Fibresolve	Imvaria, Inc	Radiology	QWO
2024-01-11	DEN220066	BrainSee	Darmiyan, Inc.	Neurology	QWT
2024-01-11	K232250	SurgiCount+ System	Stryker Instruments	General Hospital	PBZ
2024-01-08	K231324	DASI Dimensions (V1.0)	DASI Simulations	Radiology	QIH
2024-01-08	K232412	LungQ v3.0.0	Thirona BV	Radiology	JAK
2024-01-07	K231068	autoSCORE	Holberg EEG AS	Neurology	OMB
2024-01-05	K231917	VEA Align	EOS imaging	Radiology	QIH
2024-01-04	K232808	Butterfly iQ3 Ultrasound System	Butterfly Network, Inc.	Radiology	IYN
2024-01-03	K231779	REMI AI Discrete Detection Module	Epitel, Inc.	Neurology	OMB
2023-12-26	K231130	TumorSight Viz	SimBioSys, Inc.	Radiology	QIH
2023-12-22	K232535	MAGNETOM Sola; MAGNETOM Altea	Siemens Medical Solutions USA, Inc.	Radiology	LNH
2023-12-22	K232479	ART-Plan	TheraPanacea	Radiology	MUJ
2023-12-22	K231805	qXR-LN	Qure.ai Technologies	Radiology	MYN
2023-12-21	K233112	HM70 EVO Diagnostic Ultrasound System	Samsung Medison CO., LTD.	Radiology	IYN
2023-12-20	K233176	uOmnispace.MI	Shanghai United Imaging Healthcare Co., Ltd.	Radiology	LLZ
2023-12-20	K230850	United Orthopedic Knee Patient Specific Instrumentation	Enhatch, Inc.	Orthopedic	OOG
2023-12-18	K231587	MAGNETOM Cima.X	Siemens Medical Solutions USA, Inc.	Radiology	LNH
2023-12-18	K231929	iQ-solutions	Sydney Neuroimaging Analysis Centre Pty Ltd	Radiology	QIH
2023-12-15	K230751	EW10-EC02 Endoscopy Support Program	FUJIFILM Corporation	Gastroenterology-Urology	QNP
2023-12-15	K232384	Videa Dental Assist	VideaHealth, Inc.	Radiology	MYN
2023-12-14	K231570	StrokeViewer Perfusion	NICo-Lab B.V.	Radiology	LLZ
2023-12-13	K232231	QP-BrainÂ®	Quibim S.L.	Radiology	QIH
2023-12-13	K232237	Tyto Insights for Wheeze Detection	Tyto Care Ltd.	Anesthesiology	PHZ
2023-12-12	DEN230027	NaviCam ProScan	Ankon Technologies co., ltd	Gastroenterology-Urology	QZF
2023-12-11	K232096	Transpara Density 1.0.0	Screenpoint Medical B.V.	Radiology	QIH
2023-12-08	K231898	DTX Studio Clinic (4.0)	Nobel Biocare AB	Radiology	LLZ
2023-12-08	K223757	Bonelogic	Disior Ltd	Radiology	LLZ
2023-12-07	K232381	LOGIQ Totus	GE Medical Systems Ultrasound and Primary care Diagnostics,	Radiology	IYN
2023-12-07	K232661	Myocardial Strain Software Application	Circle Cardiovascular Imaging	Radiology	LLZ
2023-12-06	K233334	Aquilion Serve SP (TSX-307B/1) V1.3	Canon Medical Systems Corporation	Radiology	JAK
2023-12-06	K233562	LINQ II Insertable Cardiac Monitor	Medtronic, Inc.	Cardiovascular	MXD
2023-12-05	K232440	Adravision Perio	Adra Corporation	Radiology	QIH
2023-12-05	K233568	Ceevra Reveal 3+	Ceevra, Inc.	Radiology	QIH
2023-12-01	K232856	Syngo Carbon Clinicals	Siemens Healthcare GmbH	Radiology	QIH
2023-11-30	K233545	EPIQ Series Diagnostic Ultrasound System	Philips Ultrasound LLC	Radiology	IYN
2023-11-29	K230179	6440 MyLabX90	Esaote S.p.A.	Radiology	IYN
2023-11-28	K231631	BriefCase-Quantification	Aidoc Medical, Ltd.	Radiology	JAK
2023-11-28	K232000	syngo.via MI Workflows; Scenium; syngo MBF	Siemens Medical Solutions USA, Inc.	Radiology	QIH
2023-11-27	K233243	ClearPoint System (Software Version 2.2)	ClearPoint Neuro Inc.	Neurology	HAW
2023-11-21	K232496	Brainomix 360 Triage Stroke	Brainomix Limited	Radiology	QAS
2023-11-17	K232501	AI Platform (AIP001)	Exo Inc	Radiology	QIH
2023-11-15	K232841	Axial3D Insight	Axial Medical Printing Limited	Radiology	QIH
2023-11-14	K232494	MAGNETOM Avanto fit; MAGNETOM Skyra fit	Siemens Medical Solutions USA, Inc.	Radiology	LNH
2023-11-13	K232083	BriefCase-Quantification	Aidoc Medical, Ltd.	Radiology	QIH
2023-11-13	K232257	Clarius Bladder AI	Clarius Mobile Health Corp.	Radiology	QIH
2023-11-09	K223754	BraveCX	Bering Ltd	Radiology	QFM
2023-11-09	K231617	MAGNETOM Free.Max; MAGNETOM Free.Star	Siemens Medical Solutions USA, Inc.	Radiology	LNH
2023-11-08	K230534	BriefCase-Quantification	Aidoc Medical, Ltd.	Radiology	QIH
2023-11-08	K231765	Contour ProtÃ©gÃ©AI	MIM Software Inc.	Radiology	QKB
2023-11-07	K231966	LOGIQ E10	GE Medical Systems Ultrasound and Primary care Diagnostics,	Radiology	IYN
2023-11-07	K231989	LOGIQ E10s, LOGIQ Fortis	GE Medical Systems Ultrasound and Primary Care Diagnostic,	Radiology	IYN
2023-11-06	K231470	Lunit INSIGHT DBT	Lunit Inc.	Radiology	QDQ
2023-11-03	K231955	aprevoÂ® Digital Segmentation	Carlsmed, Inc.	Radiology	QIH
2023-10-30	K232751	BriefCase-Triage	Aidoc Medical, Ltd.	Radiology	QAS
2023-10-30	K231965	Voluson Expert 22, Voluson Expert 20, Voluson Expert 18	GE Medical Systems Ultrasound and Primary Care Diagnostics,	Radiology	IYN
2023-10-30	K232145	ACUSON Sequoia Diagnostic Ultrasound System, ACUSON Sequoia Select Diagnostic Ultrasound System, ACUSON Origin Diagnostic Ultrasound System	Siemens Medical Solutions USA, Inc.	Radiology	IYN
2023-10-27	K232045	MeVis Liver Suite	MeVis Medical Solutions AG	Radiology	JAK
2023-10-27	K230854	SwiftMR	AIRS Medical Inc.	Radiology	LLZ
2023-10-26	K232500	Lumify Diagnostic Ultrasound System	Philips Ultrasound	Radiology	IYN
2023-10-25	K230842	SignalHF (IM008)	Implicity Inc.	Cardiovascular	QNL
2023-10-25	K232436	Rapid SDH	iSchemaView, Inc.	Radiology	QAS
2023-10-23	K232305	AI-Rad Companion Brain MR	Siemens Medical Solutions U.S.A.	Radiology	QIH
2023-10-23	K231560	MAGNETOM Vida; MAGNETOM Lumina; MAGNETOM Aera; MAGNETOM Skyra; MAGNETOM Prisma; MAGNETOM Prisma fit	Siemens Medical Solutions USA, Inc.	Radiology	LNH
2023-10-23	K231764	Ultrasound System 1300	BK Medical Aps	Radiology	IYN
2023-10-20	K230209	Sonix Health	Ontact Health Co., Ltd.	Radiology	QIH
2023-10-13	K231642	Veuron-Brain-pAb3	Heuron Co., Ltd.	Radiology	LLZ
2023-10-13	K230370	SpotLight/SpotLight Duo (with DLIR option)	Arineta Ltd.	Radiology	JAK
2023-10-11	K230220	NeuViz 128 Multi-Slice CT Scanner System	Neusoft Medical Systems Co., Ltd.	Radiology	JAK
2023-10-06	K230144	Denti.AI Detect	Denti.AI Technology, Inc.	Radiology	MYN
2023-10-06	K223905	VivioÂ® LVEDP System	Avicena, LLC	Cardiovascular	QUO
2023-10-06	K232787	ScanNav Anatomy Peripheral Nerve Block	Intelligent Ultrasound Limited	Anesthesiology	QRG
2023-10-06	K232760	SwoopÂ® Portable MR Imaging SystemÂ®	Hyperfine, Inc.	Radiology	LNH
2023-10-05	K232367	cmAngioÂ® V1.0	CureMetrix, Inc.	Radiology	QIH
2023-10-05	K232704	Clarius Ultrasound Scanner	Clarius Mobile Health Corp.	Radiology	IYN
2023-10-05	K231001	DeepTek CXR Analyzer v1.0	DeepTek Medical Imaging Pvt Ltd	Radiology	MYN
2023-10-04	K232023	Momentum Spine	Momentum Health Inc.	Radiology	LDK
2023-10-04	K231025	EFAI NeuroSuite CT ICH Assessment System	Ever Fortune.AI Co., Ltd.	Radiology	QAS
2023-10-04	K231398	VUNO Med-DeepBrain	VUNO Inc.	Radiology	QIH
2023-10-03	K232712	uMI Panorama	Shanghai United Imaging Healthcare Co., Ltd.	Radiology	KPS
2023-10-03	K231772	V8/H8 Diagnostic Ultrasound System, V7/H7 Diagnostic Ultrasound System, V6/H6 Diagnostic Ultrasound System	Samsung Medison Co., Ltd.	Radiology	IYN
2023-10-03	K230085	Lung-CAD	Imagen Technologies, Inc	Radiology	MYN
2023-09-29	K230045	HipCheck	Stryker Corp.	Radiology	QIH
2023-09-28	K231837	Brainomix 360 Triage LVO	Brainomix Limited	Radiology	QAS
2023-09-28	K232699	Low Ejection Fraction AI-ECG Algorithm	Anumana, Inc.	Cardiovascular	QYE
2023-09-27	K232616	Volta AF-Xplorer	Volta Medical	Cardiovascular	DQK
2023-09-26	K230252	OFIX MIS App	Orthofix US LLC	Radiology	LLZ
2023-09-25	K231928	EFAI RTSUITE CT HCAP-Segmentation System	Ever Fortune.AI Co., Ltd.	Radiology	QKB
2023-09-22	K231767	Annalise Enterprise CTB Triage Trauma	Annalise-AI Pty Ltd	Radiology	QAS
2023-09-22	K231149	qXR-CTR	Qure.ai Technologies	Radiology	QIH
2023-09-22	K223659	Jazz	AI Medical AG	Radiology	LLZ
2023-09-22	K231384	Annalise Enterprise CTB Triage Trauma	Annalise-AI Pty Ltd.	Radiology	QAS
2023-09-21	K231678	Overjet Periapical Radiolucency Assist	Overjet, Inc	Radiology	MYN
2023-09-19	K231281	Aquilion Serve (TSX-307A/1) V1.3	Canon Medical Systems Corporation	Radiology	JAK
2023-09-19	K221309	AI100 with Shonit	SigTuple Technologies Pvt. Ltd.	Hematology	JOY
2023-09-14	K220034	NEUROShield	In-Med Prognostics L3C	Radiology	LLZ
2023-09-13	K223811	Lung-CAD	Imagen Technologies, Inc	Radiology	MYN
2023-09-12	K231748	Cartesion Prime (PCD-1000A/3) V10.15	Canon Medical Systems Corporation	Radiology	KPS
2023-09-12	K232526	XIDF-AWS801, Angio Workstation (Alphenix Workstation), V9.5	Canon Medical Systems Corporation	Radiology	JAA
2023-09-09	K223864	Alignment System Cranial, Alignment Software Cranial, Cirq Alignment Software Cranial Biopsy, Cirq Alignment Software Cranial sEEG, Varioguide Alignment Software Cranial	Brainlab AG	Neurology	HAW
2023-09-08	K231335	Cleerly ISCHEMIA	Cleerly, Inc	Cardiovascular	QXZ
2023-09-08	K232686	CorVistaÂ® System	CorVista Health, Inc.	Cardiovascular	QXX
2023-09-08	K222921	Minuteful-kidney test	Healthy.io Ltd.	Clinical Chemistry	JIR
2023-09-08	K223621	DeepXray	Alpha Intelligence Manifolds, Inc.	Radiology	QIH
2023-09-07	K231207	CARTOÂ™ 3 EP Navigation System Software V8.0 (FG-5400-00, FG-5400-00U)	Biosense Webster, Inc.	Cardiovascular	DQK
2023-09-06	K232482	MAGNETOM Viato.Mobile	Siemens Medical Solutions USA, Inc.	Radiology	LNH
2023-09-01	K223622	FaceHeart Vitals Software Development Kit (FH vitals SDK)	FaceHeart Corp.	Cardiovascular	QME
2023-08-30	K230355	Vantage Galan 3T, MRT-3020, V9.0 with AiCE Reconstruction Processing Unit for MR	Canon Medical Systems Corporation	Radiology	LNH
2023-08-28	K223639	VisAble.IO	TechsoMed	Radiology	QTZ
2023-08-25	K223180	AIRAscore	AIRAmed GmbH	Radiology	LLZ
2023-08-23	K230812	Withings Scan Monitor 2.0	Withings	Cardiovascular	DPS
2023-08-22	K230899	qXR-PTX-PE	Qure.ai Technologies	Radiology	QFM
2023-08-18	K223539	Dreem 3S	Beacon Biosignals, Inc.	Neurology	OLZ
2023-08-15	K231094	Annalise Enterprise CTB Triage-OH	Annalise-AI Pty Ltd	Radiology	QAS
2023-08-03	DEN230003	Viz HCM	Viz.ai, Inc.	Cardiovascular	QXO
2023-08-03	K223133	VisiRad XR	Imidex Inc.	Radiology	MYN
2023-08-02	K223553	Spine Planning (2.0), Elements Spine Planning, Elements Planning Spine	Brainlab AG	Neurology	OLO
2023-07-27	K231195	Brainomix 360 Triage ICH	Brainomix Limited	Radiology	QAS
2023-07-27	K230074	Rapid Aneurysm Triage and Notification	iSchemaView Inc.	Radiology	QFM
2023-07-26	K231038	Global Hypoperfusion Index (GHI) Algorithm	Edwards Lifesciences, LLC	Cardiovascular	QNL
2023-07-26	K231572	uMI Panorama	Shanghai United Imaging Healthcare Co., Ltd.	Radiology	KPS
2023-07-25	K230913	ANDI	Imeka Solutions, Inc.	Radiology	QIH
2023-07-25	K223473	ME-APDSÂ™; MAGENTIQ-COLOÂ™	Magentiq Eye LTD	Gastroenterology-Urology	QNP
2023-07-25	K230365	Sonio Detect	Sonio	Radiology	IYN
2023-07-24	K223347	UltraSight AI Guidance	UltraSight Inc.	Radiology	QJU
2023-07-21	K230150	OptimMRI	RebrAIn, SAS	Radiology	QIH
2023-07-21	K223288	Cranial Navigation, Navigation Software Cranial, Navigation Software Craniofacial, Cranial EM System, Automatic Registration iMRI	Brainlab AG	Neurology	HAW
2023-07-21	K231173	Irregular Rhythm Notification Feature (IRNF)	Apple Inc.	Cardiovascular	QDB
2023-07-20	K230039	uOmnispace	Shanghai United Imaging Healthcare Co., Ltd	Radiology	QIH
2023-07-19	K231157	syngo.CT Lung CAD (Version VD30)	Siemens Healthcare GmbH	Radiology	OEB
2023-07-14	K223106	Brainlab Elements Image Fusion, Contouring (4.5);Image Fusion (4.5);Fibertracking (2.0);BOLD MRI Mapping (1.0);Image Fusion Angio (1.0)	Brainlab AG	Radiology	QIH
2023-07-14	K231757	Ez3D-i /E3	Ewoosoft Co., Ltd	Radiology	QIH
2023-07-13	K231833	Biograph Vision.X and Biograph Vision.X Edge	Siemens Medical Solutions USA, Inc.	Radiology	KPS
2023-07-13	K223424	Spine Auto Views	GE Medical Systems SCS	Radiology	JAK
2023-07-13	K223426	ECHELON Synergy MRI system	FUJIFILM Healthcare Corporation	Radiology	LNH
2023-07-12	K230823	AusculThing ACC	AusculThing Oy	Cardiovascular	DQD
2023-07-10	K223724	MOZI TPS	Manteia Technologies Co., Ltd.	Radiology	MUJ
2023-07-07	K231668	Spine CAMPÂ™ (1.1)	Medical Metrics, Inc.	Radiology	QIH
2023-07-03	K222745	Axial3D Insight	Axial Medical Printing Limited	Radiology	QIH
2023-06-29	DEN200052	KidneyIntelX.dkd	Renalytix AI, Inc.	Clinical Chemistry	QWZ
2023-06-29	K230337	EarliPoint	EarliTec Diagnostics, Inc	Neurology	QPF
2023-06-22	K230497	Bladder AI (AIBV01)	Exo Inc	Radiology	QIH
2023-06-20	K231459	HepaFatSmart (V2.0.0)	Resonance Health Analysis Services Pty Ltd	Radiology	LNH
2023-06-20	K230346	Voluson SWIFT; Voluson SWIFT+	GE Medical Systems Ultrasound & Primary Care Diagnostic, LLC	Radiology	IYN
2023-06-16	K223556	DeepCatch	MEDICALIP Co., Ltd	Radiology	QIH
2023-06-16	K223646	IB Lab LAMA	IB Lab GmbH	Radiology	QIH
2023-06-16	K223357	EyeArt v2.2.0	Eyenuk, Inc.	Ophthalmic	PIB
2023-06-13	K230112	CAC Software	Imbio, Inc.	Radiology	JAK
2023-06-06	K223855	FEops HEARTguideTM, FEops HEARTguideTM ALPACA	FEops nv	Radiology	QIH
2023-05-30	K223523	Sonic DL	GE Medical Systems,LLC (GE Healthcare)	Radiology	LNH
2023-05-25	K230273	Saranas Early Bird Bleed Monitoring System	Saranas Inc.	Cardiovascular	QFJ
2023-05-25	K223491	Critical Care Suite with Pneumothorax Detection AI Algorithm, Critical Care Suite 2.1, Critical Care Suite	GE Medical Systems, LLC	Radiology	QBS
2023-05-23	K223504	Ceribell Status Epilepticus Monitor	Ceribell, Inc.	Neurology	OMB
2023-05-23	K230096	Genius AI Detection 2.0 with CC-MLO Correlation	Hologic, Inc.	Radiology	QDQ
2023-05-19	K231143	GI Genius System 100 and GI Genius System 200	Cosmo Artificial Intelligence - AI Ltd	Gastroenterology-Urology	QNP
2023-05-19	K212758	Autoplaque	Cedars-Sinai Medical Center: AIM	Radiology	LLZ
2023-05-17	K222728	Radiation Planning Assistant (RPA)	University of Texas, MD Anderson Cancer Center	Radiology	MUJ
2023-05-12	K231190	EPIQ Series Diagnostic Ultrasound System	Philips Ultrasound LLC	Radiology	IYN
2023-05-11	K223623	SubtleMR (2.3.x)	Subtle Medical Inc.	Radiology	LLZ
2023-05-10	K220437	Neurophet AQUA	NEUROPHET, Inc.	Radiology	LLZ
2023-05-04	K230082	Auto Segmentation	GE Medical Systems, LLC	Radiology	QKB
2023-05-04	K223771	Lumify Diagnostic Ultrasound System	Philips Ultrasound	Radiology	IYN
2023-05-02	K230292	Samsung ECG Monitor Application with Irregular Heart Rhythm Notification	Samsung Electronics Co., Ltd	Cardiovascular	QDA
2023-05-02	K230977	SIS System	Surgical Information Sciences, Inc.	Radiology	QIH
2023-04-28	P210011	xT CDx	Tempus Labs, Inc.	Pathology	PQP
2023-04-27	K223212	Precision DL	GE Healthcare	Radiology	KPS
2023-04-27	K223734	ENT EM	Brainlab AG	Neurology	PGW
2023-04-26	K230552	MR DWI/FLAIR Measurement V1.0	Olea Medical	Radiology	LLZ
2023-04-26	K230553	LINQ II Insertable Cardiac Monitor, CareLink SmartSync LINQ II ICM Application	Medtronic, Inc.	Cardiovascular	MXD
2023-04-25	K230223	iCAC Device	Bunkerhill, Inc	Radiology	JAK
2023-04-25	K222676	Ceevra Reveal 3	Ceevra, Inc.	Radiology	QIH
2023-04-21	K230084	HERA W10 Diagnostic Ultrasound System; HERA W9 Diagnostic Ultrasound System	Samsung Medison CO., LTD.	Radiology	IYN
2023-04-21	K223501	ViewFinder Software Version 1.1	Elaitra Ltd	Radiology	QIH
2023-04-20	K223287	Velacur	Sonic Incytes	Radiology	IYO
2023-04-20	K230807	Deep Learning Image Reconstruction	GE Healthcare Japan Corporation	Radiology	JAK
2023-04-19	K230023	ART-Plan	Therapanacea SAS	Radiology	QKB
2023-04-19	K223552	Brainlab Elements Â– Trajectory Planning (2.6), Elements Stereotaxy, Elements Lead Localization, Elements Trajectory Planning Cranial	Brainlab AG	Neurology	HAW
2023-04-17	K230772	Quantib Prostate	Quantib BV	Radiology	LLZ
2023-04-14	K230685	AutoContour Model RADAC V3	Radformation, Inc.	Radiology	QKB
2023-04-13	K230264	Ezra Flash	Ezra AI, Inc.	Radiology	LLZ
2023-04-13	K213986	CerebralGo Plus	Yukun (Beijing) Technology Co., Ltd	Radiology	QIH
2023-04-11	K223830	Ultrasound System 2300	BK Medical Aps	Radiology	IYN
2023-04-07	K230658	SKOUTÂ® system	Iterative Scopes Inc.	Gastroenterology-Urology	QNP
2023-04-07	K230575	Limbus Contour	Limbus AI Inc.	Radiology	LLZ
2023-04-06	K222360	AI-Rad Companion (Cardiovascular)	Siemens Medical Solutions U.S.A.	Radiology	JAK
2023-04-06	K223458	Ingenia, Ingenia CX, Ingenia Elition, Ingenia Ambition, MR 5300 and MR 7700 MR Systems	Philips Medical Systems Nederland B.V.	Radiology	LNH
2023-04-06	K223774	Contour ProtÃ©gÃ©AI	MIM Software Inc.	Radiology	QKB
2023-04-05	K223630	Reveal LINQ Insertable Cardiac Monitor, LINQ II Insertable Cardiac Monitor, AccuRhythm AI ECG Classification System	Medtronic, Inc.	Cardiovascular	MXD
2023-04-03	K223240	Annalise Enterprise CTB Triage Trauma	Annalise-AI Pty Ltd	Radiology	QAS
2023-03-31	K220068	Butterfly iQ/iQ+ Ultrasound System	Butterfly Network, Inc.	Radiology	IYO
2023-03-31	K213272	Formus Hip	Formus Labs, Ltd	Radiology	QIH
2023-03-31	DEN200011	Masimo SafetyNet	Masimo Corporation	Anesthesiology	QVT
2023-03-29	K222312	RayStation 12A	RaySearch Laboratories AB (publ)	Radiology	MUJ
2023-03-28	K221921	DTX Studio Clinic 3.0	Nobel Biocare AB	Radiology	MYN
2023-03-28	K222174	RadioLens v1.0	Synapsica	Radiology	QIH
2023-03-28	K222179	Annalise Enterprise CXR Triage Trauma	Annalise-AI Pty Ltd	Radiology	QFM
2023-03-28	K222268	Annalise Enterprise CXR Triage Trauma	Annalise-AI Pty Ltd	Radiology	QFM
2023-03-28	K223343	MAGNETOM Amira; MAGNETOM Sempra	Siemens Medical Solutions USA Inc.	Radiology	LNH
2023-03-27	K222746	Overjet Caries Assist	Overjet, Inc.	Radiology	MYN
2023-03-22	K222036	MPXA-2000	Medipixel, Inc.	Radiology	QIH
2023-03-21	K223490	FlightPlan for Embolization	GE Medical Systems SCS	Radiology	LLZ
2023-03-17	K223443	Viz AAA	Viz. ai, Inc.	Radiology	QFM
2023-03-17	K223073	Alio	Alio, Inc.	Cardiovascular	DRG
2023-03-17	K221772	NeuroRPM	New Touch Digital Inc.	Neurology	GYD
2023-03-10	K223325	uMI Panorama	Shanghai United Imaging Healthcare Co., Ltd.	Radiology	KPS
2023-03-09	K223514	Spectral Bone Marrow	GE Medical Systems, LLC	Radiology	JAK
2023-03-09	K221706	AccuContour	Manteia Technologies Co., Ltd.	Radiology	QKB
2023-03-07	K223726	Aquilion Precision (TSX-304A/4) V10.14 with AiCE	Canon Medical Systems Corporation	Radiology	JAK
2023-03-03	K222819	Aquilion Serve (TSX-307A/1) V1.2 with AiCE-i	Canon Medical Systems Corporation	Radiology	JAK
2023-03-02	K222176	BoneView	Gleamer	Radiology	QBS
2023-03-02	K222884	Rapid NCCT Stroke	iSchemaView, Inc.	Radiology	QAS
2023-03-01	K221680	Xeleris V Processing and Review System	GE Healthcare	Radiology	LLZ
2023-02-24	DEN220063	Caption Interpretation Automated Ejection Fraction Software	Caption Health, Inc	Radiology	QVD
2023-02-24	K221592	AVIEW Lung Nodule CAD	Coreline Soft Co.,Ltd.	Radiology	OEB
2023-02-23	K222579	Belun Sleep System BLS-100	Belun Technology Company Limited	Anesthesiology	MNR
2023-02-23	K221564	Brainomix 360 e-ASPECTS	Brainomix Limited	Radiology	POK
2023-02-22	K230197	BoneMRI v1.6	MRIguidance B.V.	Radiology	QIH
2023-02-22	K230208	SwoopÂ® Portable MR Imaging SystemÂ™	Hyperfine, Inc.	Radiology	LNH
2023-02-17	DEN210022	PMD-200	Medasense Biometrics Ltd.	Anesthesiology	QVE
2023-02-16	K223028	uCT ATLAS Astound with uWS-CT-Dual Energy Analysis	Shanghai United Imaging Healthcare Co., Ltd.	Radiology	JAK
2023-02-16	K222755	uMR 680	Shanghai United Imaging Intelligence Co., Ltd.	Radiology	LNH
2023-02-15	K222389	ZEUS System	iRhythm Technologies, Inc.	Cardiovascular	DQK
2023-02-13	K223439	SIGNA Victor	GE Healthcare (Tianjin) Company Limited	Radiology	LNH
2023-02-13	K223387	V8 Diagnostic Ultrasound System, V7 Diagnostic Ultrasound System	Samsung Medison Co., Ltd.	Radiology	IYN
2023-02-06	K223296	Videa Perio Assist	VideaHealth, Inc.	Radiology	QIH
2023-02-02	K222803	Oncospace	Oncospace, Inc.	Radiology	MUJ
2023-02-01	K222970	LVivo IQS	DiA Imaging Analysis Ltd	Radiology	QIH
2023-02-01	K223396	Rapid RV/LV	iSchema View Inc.	Radiology	QIH
2023-02-01	K230020	BriefCase	Aidoc Medical, Ltd.	Radiology	QFM
2023-01-27	K221868	QOCA image Smart CXR Image Processing System	Quanta Computer Inc.	Radiology	QFM
2023-01-23	K222406	Clarius AI	Clarius Mobile Health Corp.	Radiology	QIH
2023-01-21	K223516	VX1+	Volta Medical	Cardiovascular	DQK
2023-01-18	K222593	TruPlan Computed Tomography (CT) Imaging Software	Circle Cardiovascular Imaging, Inc.	Radiology	LLZ
2023-01-13	K223502	MR Diffusion Perfusion Mismatch V1.0	Olea Medical	Radiology	LLZ
2023-01-12	K222458	AIBOLIT 3D+	Aibolit Technologies, LLC	Radiology	LLZ
2023-01-11	K223738	Alpha Control Liner System (ACLS)	Coapt	Neurology	GXY
2022-12-23	K214036	AVIEW	Coreline Soft Co.,Ltd.	Radiology	QIH
2022-12-23	K223442	MR 5300 and MR 7700 R11 MR Systems	Philips Medical Systems Nederlands B.V.	Radiology	LNH
2022-12-22	K223311	Philips CT 3500	Philips Healthcare (Suzhou) Co., Ltd	Radiology	JAK
2022-12-16	K220928	Overjet Calculus Assist	Overjet Inc.	Radiology	MYN
2022-12-16	K223268	BrainInsight	Hyperfine, Inc.	Radiology	QIH
2022-12-16	K222275	Saige-Density	DeepHealth, Inc.	Radiology	QIH
2022-12-06	K223247	Swoop Portable MR Imaging System	Hyperfine, Inc.	Radiology	LNH
2022-12-05	K222692	BriefCase	Aidoc Medical, Ltd.	Radiology	QFM
2022-12-01	K220786	STAR Apollo Mapping System	Rhythm Al, Ltd	Cardiovascular	DQK
2022-11-22	K221624	Avenda Health AI Prostate Cancer Planning Software	Avenda Health, Inc.	Radiology	POK
2022-11-22	K221716	CINA	AVICENNA.AI	Radiology	QAS
2022-11-21	K223032	SIS System (Version 5.6.0)	Surgical Information Sciences, Inc.	Radiology	QIH
2022-11-18	K221330	BriefCase	Aidoc Medical, Ltd.	Radiology	QAS
2022-11-16	K221762	BoneMRI v1.4	MRlguidance B.V.	Radiology	QIH
2022-11-14	K222428	Syngo Dynamics (Version VA40F)	Siemens Medical Solutions USA, Inc.	Radiology	QIH
2022-11-10	K220408	AVIEW RT ACS	Coreline Soft Co.,Ltd	Radiology	QKB
2022-11-10	K221183	AEYE-DS	AEYE Health, Inc.	Ophthalmic	PIB
2022-11-08	K221552	EFAI ChestSuite XR Pneumothorax Assessment System	Ever Fortune AI Co., Ltd.	Radiology	QFM
2022-10-31	P210015	Avive Automated External Defibrillator (AED) System	Avive Solutions, Inc.	Cardiovascular	MKJ
2022-10-27	K220332	uMR Omega with uWS-MR-MRS	Shanghai United Imaging Healthcare Co.,Ltd.	Radiology	LNH
2022-10-25	K222070	EndoNaut	Therenva SAS	Radiology	OWB
2022-10-21	K223042	Viz LVO ContaCT	Viz.ai, Inc.	Radiology	QAS
2022-10-20	K222361	AI-Rad Companion (Musculoskeletal)	Siemens Medical Solutions USA, Inc.	Radiology	JAK
2022-10-18	K221632	Spine CAMPÂ™	Medical Metrics, Inc.	Radiology	QIH
2022-10-18	DEN220024	ScanNav Anatomy Peripheral Nerve Block	Intelligent Ultrasound Limited	Anesthesiology	QRG
2022-10-14	K213857	HeartFlow Analysis	HeartFlow, Inc.	Cardiovascular	PJA
2022-10-14	K221305	AI-Rad Companion Organs RT	Siemens Medical Solutions USA, Inc	Radiology	QKB
2022-10-07	K220709	BriefCase	Aidoc Medical, Ltd.	Radiology	QAS
2022-10-06	K221449	Genius AI Detection 2.0	Hologic, Inc.	Radiology	QDQ
2022-10-05	K221892	VISIONAIR	PacificMD Biotech Llc	Anesthesiology	BXQ
2022-09-30	K211611	QIR Suite	CASIS Cardiac Simulation & Imaging Software	Radiology	QIH
2022-09-29	K220080	CogNet QmTRIAGE	MedCognetics, Inc.	Radiology	QFM
2022-09-28	K222329	BriefCase	Aidoc Medical, Ltd.	Radiology	QAS
2022-09-27	K221738	NS-HGlio	Neosoma Inc.	Radiology	QIH
2022-09-21	K221179	SomnoMetry	Neumetry Medical Inc	Neurology	OLZ
2022-09-20	K213353	Aorta-CAD	Imagen Technologies, Inc	Radiology	MYN
2022-09-13	K221733	MAGNETOM Sola, MAGNETOM Altea, MAGNETOM Sola Fit	Siemens Medical Solutions USA, Inc.	Radiology	LNH
2022-09-12	K221456	Rapid ICH	iSchemaView Inc.	Radiology	QAS
2022-09-12	K220986	Aquilion Precision (TSX-304A/4) V10.10 with AiCE	Canon Medical Systems Corporation	Radiology	JAK
2022-09-08	K222076	EFAI ChestSuite XR Pleural Effusion Assessment System	Ever Fortune.AI Co., Ltd.	Radiology	QFM
2022-09-07	K220783	syngo.via RT Image Suite	Siemens Medical Solutions USA Inc.	Radiology	MUJ
2022-09-06	K213960	LiverMultiScan v5 (LMSv5)	Perspectum	Radiology	LNH
2022-09-01	K221241	DrAid for Radiology v1	VinBrain Joint Stock Company	Radiology	QFM
2022-08-29	K221100	Viz RV/LV	Viz.ai, Inc.	Radiology	QIH
2022-08-26	K222277	BriefCase	Aidoc Medical, Ltd.	Radiology	QAS
2022-08-25	K211841	MRI Planner	Spectronic Medical AB	Radiology	MUJ
2022-08-25	K221962	LINQ II Insertable Cardiac Monitor	Medtronic, Inc.	Cardiovascular	MXD
2022-08-24	K220598	AutoContour Model RADAC V2	Radformation, Inc.	Radiology	QKB
2022-08-22	K221599	HS40 Diagnostic Ultrasound System	Samsung Medison Co., Ltd.	Radiology	IYN
2022-08-19	K222172	MI View&GO	Siemens Medical Solutions USA, Inc.	Radiology	QIH
2022-08-12	K220349	TeraRecon Neuro	TeraRecon, Inc	Radiology	LLZ
2022-08-12	K213686	SKOUT Software	Iterative Scopes Inc.	Gastroenterology-Urology	QNP
2022-08-11	K213713	AI-Rad Companion (Pulmonary)	Siemens Healthcare GmBh	Radiology	JAK
2022-08-08	K213645	ClearPoint Maestro Brain Model	ClearPoint Neuro, Inc.	Radiology	QIH
2022-08-03	K221432	Customize	3D-Side SA	Radiology	QIH
2022-08-03	K221347	Transpara 1.7.2	ScreenPoint Medical B.V.	Radiology	QDQ
2022-07-29	K213760	ABMD Software	HeartLung Corporation	Radiology	KGI
2022-07-29	K220961	Deep Learning Image Reconstruction	GE Healthcare Japan Corporation	Radiology	JAK
2022-07-28	K221923	Swoop Portable MR Imaging System	Hyperfine, Inc.	Radiology	LNH
2022-07-28	K213998	cvi42 Auto Imaging Software Application	Circle Cardiovascular Imaging Inc	Radiology	QIH
2022-07-27	K210822	DeepRhythmAI	Medicalgorithmics S.A.	Cardiovascular	DQK
2022-07-25	K220439	Viz SDH	Viz.ai, Inc.	Radiology	QAS
2022-07-22	K220940	EchoPAC Software Only, EchoPAC Plug-in	GE Medical Systems Ultrasound and Primary Care Diagnostics,	Radiology	QIH
2022-07-22	K220624	AI4CMR v1.0	AI4MedImaging Medical Solutions S.A.	Radiology	LLZ
2022-07-22	K220882	Vivid E80, Vivid E90, Vivid E95	GE Medical Systems Ultrasound and	Radiology	IYN
2022-07-20	K220956	Libby Echo:Prio	Dyad Medical, Inc	Radiology	QIH
2022-07-19	K220815	BrainInsight	Hyperfine, Inc.	Radiology	QIH
2022-07-19	K213409	ZEUS System (Zio Watch)	iRhythm Technologies, Inc.	Cardiovascular	DQK
2022-07-19	K213357	Study Watch with Irregular Pulse Monitor (Home), Study Watch with Irregular Pulse Monitor	Verily Life Sciences LLC	Cardiovascular	DXH
2022-07-18	K221148	Vivid iq	GE Medical Systems Ultrasound & Primary Care Diagnostics LLC	Radiology	IYN
2022-07-18	K221147	Vivid T8, Vivid T9	GE Medical Systems Ultrasound and Primary Care Diagnostics,	Radiology	IYN
2022-07-15	K220619	Vivid S60N, Vivid S70N	GE Medical Systems Ultrasound and Primary Care Diagnostics,	Radiology	IYN
2022-07-14	K221203	AHI System	Fifth Eye Inc.	Cardiovascular	QNV
2022-07-13	K221727	syngo.CT Extended Functionality	Siemens Medical Solutions USA, Inc.	Radiology	JAK
2022-07-08	K212783	ProstatID	ScanMed, LLC	Radiology	QDQ
2022-07-06	K210069	Minuteful - kidney test	Healthy.io Ltd.	Clinical Chemistry	JIR
2022-06-29	K220975	V8 Diagnostic Ultrasound System, V7 Diagnostic Ultrasound System	Samsung Medison Co., Ltd.	Radiology	IYN
2022-06-29	K213794	Eko Murmur Analysis Software (EMAS)	Eko Devices, Inc.	Cardiovascular	DQD
2022-06-27	K220851	Venue	GE Medical Systems	Radiology	IYN
2022-06-27	K220848	Venue Fit	GE Medical Systems	Radiology	IYN
2022-06-24	K220575	MAGNETOM Free.Max, MAGNETOM Free.Star	Siemens Medical Solutions USA, Inc.	Radiology	LNH
2022-06-23	K220497	CoLumbo	Smart Soft Healthcare AD	Radiology	QIH
2022-06-21	K220800	Venue Go	GE Medical Systems Ultrasound and Primary Care Diagnostics	Radiology	IYN
2022-06-17	K213037	IDx-DR v2.3	Digital Diagnostics Inc.	Ophthalmic	PIB
2022-06-17	K220813	ART-PLAN	TheraPanacea	Radiology	QKB
2022-06-17	K221463	ElucidVivo A.3	Elucid Bioimaging Inc.	Radiology	LLZ
2022-06-16	K213504	Aquilion ONE (TSX-306A/3) V10.12 with Spectral Imaging System, Vitrea Software Package, VSTP-001A	Canon Medical Systems Corporation	Radiology	JAK
2022-06-10	K221393	Swoop Portable MR Imaging System	Hyperfine, Inc.	Radiology	LNH
2022-06-08	K213882	EarliPoint System	EarliTec Diagnostics, Inc.	Neurology	QPF
2022-06-08	K213717	AIR Recon DL	GE Medical Systems,LLC (GE Healthcare)	Radiology	LNH
2022-06-06	K220358	Voluson Expert 22, Voluson Expert 20, Voluson Expert 18	GE Medical Systems Ultrasound and Primary Care Diagnostics,	Radiology	IYN
2022-06-03	K221314	BriefCase	Aidoc Medical, Ltd.	Radiology	QAS
2022-06-03	K213971	Atrial Fibrillation History Feature	Apple Inc.	Cardiovascular	QDB
2022-06-02	K220164	Rayvolve	AZmed SAS	Radiology	QBS
2022-05-31	K221248	Rapid LVO	iSchemaView Inc.	Radiology	QAS
2022-05-31	K220766	eMurmur Heart AI	CSD Labs GmbH	Cardiovascular	DQD
2022-05-25	K220416	SwiftMR	AIRS Medical Inc.	Radiology	LLZ
2022-05-17	K221240	BriefCase	Aidoc Medical, Ltd.	Radiology	QAS
2022-05-17	K220499	Rapid PE Triage and Notification (PETN)	iSchemaView Inc.	Radiology	QAS
2022-05-17	K221219	syngo.CT CaScoring	Siemens Medical Solutions USA, Inc.	Radiology	JAK
2022-05-16	K213583	Achieva, Ingenia, Ingenia CX, Ingenia Elition and Ingenia Ambition MR Systems	Philips Medical Systems Nederland B.V.	Radiology	LNH
2022-05-13	K221106	Quantib Prostate	Quantib BV	Radiology	LLZ
2022-05-13	K220589	MAGNETOM Skyra Fit	Siemens Medical Solutions USA, Inc.	Radiology	LNH
2022-05-12	K220105	Saige-Dx	DeepHealth, Inc.	Radiology	QDQ
2022-05-11	K220446	Versana Balance	GE Medical Systems Ultrasound and Primary Care Diagnostics,	Radiology	IYN
2022-05-10	K212519	Overjet Caries Assist	Overjet, Inc.	Radiology	MYN
2022-05-06	K211966	Segment 3DPrint	Medviso AB	Radiology	LLZ
2022-05-03	K220013	X100HT with Slide Loader with Full Field Peripheral Blood Smear (PBS) Application	Scopio Labs Ltd.	Hematology	JOY
2022-05-03	K212915	MVision AI Segmentation	MVision AI	Radiology	QKB
2022-04-29	K220939	MAGNETOM Lumina and MAGNETOM Vida Fit with syngo MR XA50A	Siemens Medical Solutions USA Inc.	Radiology	LNH
2022-04-29	K220899	Oxehealth Vital Signs	Oxehealth Limited	Cardiovascular	QME
2022-04-29	K220590	aPROMISE X	EXINI Diagnostics AB	Radiology	LLZ
2022-04-28	K220264	EFAI RTSuite CT HN-Segmentation System	Ever Fortune.AI Co., Ltd.	Radiology	QKB
2022-04-27	K212441	Philips Incisive CT	Philips Healthcare (Suzhou) Co., Ltd.	Radiology	JAK
2022-04-26	K212662	AliveCor QT Service	AliveCor, Inc.	Cardiovascular	DQK
2022-04-26	K213886	BriefCase	Aidoc Medical, Ltd.	Radiology	QAS
2022-04-22	K213944	HealthOST	NanoxAI Ltd.	Radiology	JAK
2022-04-21	K213795	Videa Caries Assist	VideaHealth, Inc	Radiology	MYN
2022-04-15	K213706	AI-Rad Companion Brain MR	Siemens Healthcare GmBh	Radiology	QIH
2022-04-15	K220141	RayStation 11B	RaySearch Laboratories AB (publ)	Radiology	MUJ
2022-04-08	K220192	Vantage Galan 3T, MRT-3020, V8.0 with AiCE Reconstruction Processing Unit for MR	Canon Medical Systems Corporation	Radiology	LNH
2022-04-08	K212274	INT Contour	Carina Medical LLC	Radiology	MUJ
2022-04-06	K203783	ClariPulmo	ClariPi Inc.	Radiology	LLZ
2022-04-05	K220043	HERA W10 Diagnostic Ultrasound System, HERA W9 Diagnostic Ultrasound System	Samsung Medison Co., LTD	Radiology	IYN
2022-04-05	K214081	MRCAT Head & Neck	Philips Oy	Radiology	MUJ
2022-04-04	K212624	EFAI Intelligent Cardiothoracic Ratio (iCTR) Assessment System	Ever Fortune. AI Co., Ltd.	Radiology	QIH
2022-04-01	K220151	MAGNETOM Avanto Fit	Siemens Medical Solutions USA, Inc.	Radiology	LNH
2022-04-01	K213657	DEEPVESSEL FFR	KeyaMed NA Inc.	Cardiovascular	PJA
2022-03-22	K212960	Aplio a550, Aplio a450, and Aplio a, Diagnostic Ultrasound System, Software V6.5	Canon Medical Systems Corporation	Radiology	IYN
2022-03-22	K200828	Athelas Home	Athelas Inc.	Hematology	GKZ
2022-03-21	K213721	BriefCase	Aidoc Medical, Ltd.	Radiology	QAS
2022-03-16	K213779	Customize	3D-Side SA	Radiology	QIH
2022-03-14	K214043	BriefCase	Aidoc Medical, Ltd.	Radiology	QFM
2022-03-14	K203744	Arterys MICA	Arterys Inc.	Radiology	QIH
2022-03-11	K213725	CardIQ Suite	GE Medical Systems SCS	Radiology	JAK
2022-03-10	K213566	ClearRead Xray Pneumothorax	Riverain Technologies, Inc.	Radiology	QFM
2022-03-04	K210365	Second Opinion	Pearl Inc.	Radiology	MYN
2022-03-01	K212365	BoneView	Gleamer	Radiology	QBS
2022-02-25	K213693	MAGNETOM Vida with syngo MR XA50A	Siemens Medical Solutions USA, Inc.	Radiology	LNH
2022-02-24	K213941	Annalise Enterprise CXR Triage Pneumothorax	Annalise-AI	Radiology	QFM
2022-02-18	K213319	Viz ANEURYSM, Viz ANX	Viz.ai, Inc.	Radiology	QFM
2022-02-18	K213999	Deep Learning Image Reconstruction	GE Medical Systems, LLC.	Radiology	JAK
2022-02-17	K213689	Voluson P6, Voluson P8	GE Healthcare	Radiology	IYN
2022-02-11	K213603	SIGNA Artist Evo	GE Healthcare(Tianjin) Company Limited	Radiology	LNH
2022-02-08	K213165	Rapid	iSchema View Inc.	Radiology	LLZ
2022-02-04	K212654	Micro C Medical Imaging System, M01	OXOS Medical, Inc.	Radiology	IZL
2022-02-04	K213938	Revolution Ascend	GE Healthcare Japan Corporation	Radiology	JAK
2022-02-03	K213976	Contour ProtÃ©gÃ©AI	MIM Software Inc.	Radiology	QKB
2022-01-28	K203260	syngo.CT Brain Hemorrhage	Siemens Medical Solutions USA, Inc.	Radiology	QAS
2022-01-24	K212333	Aplio i900/i800/i700 Diagnostic Ultrasound System, Software V6.5	Canon Medical Systems Corporation	Radiology	IYN
2022-01-20	K214019	syngo.CT Extended Functionality	Siemens Medical Solutions USA, Inc.	Radiology	JAK
2022-01-20	K213668	SIGNA Hero	GE Healthcare (GE Medical Systems, LLC)	Radiology	LNH
2022-01-19	K210747	Caption Interpretation Automated Ejection Fraction Software	Caption Health	Radiology	QIH
2022-01-19	K212012	Follicle Clarity	Cycle Clarity	Radiology	QIH
2022-01-16	K211980	SIGNA Prime	GE Healthcare (Tianjin) Company Limited	Radiology	LNH
2022-01-14	K210760	Precise Image	Philips Medical Systems Nederland, B.V.	Radiology	JAK
2022-01-14	K213307	Eclipse II with Smart Noise Cancellation	Carestream Health, Inc.	Radiology	MQB
2022-01-14	K213737	Quantib ND	Quantib B.V.	Radiology	LLZ
2022-01-13	K213642	Voluson S6, Voluson S8, Voluson S8t, Voluson S10, Voluson S10 Expert	GE Healthcare	Radiology	IYN
2022-01-12	K212005	UNiD Spine Analyzer	MEDICREA International, Inc.	Radiology	LLZ
2022-01-07	K211443	AIBOLIT 3D+	AIbolit Technologies, LLC	Radiology	LLZ
2022-01-06	K213544	TOMTEC-ARENA	TOMTEC Imaging Systems GmbH	Radiology	QIH
2021-12-29	K213776	LiverSmart	Resonance Health Analysis Services Pty Ltd	Radiology	PCS
2021-12-22	K202404	BoneMRI	MRIguidance B.V	Radiology	QIH
2021-12-21	K212690	qXR-BT	Qure.ai Technologies	Radiology	QIH
2021-12-21	K210670	BU-CAD	TaiHao Medical Inc.	Radiology	QDQ
2021-12-20	K213275	EchoGo Core (2.0)	Ultromics Limited	Radiology	QIH
2021-12-16	K213628	VBrain	Vysioneer Inc.	Radiology	QKB
2021-12-16	K212616	Koios DS	Koios Medical, Inc.	Radiology	POK
2021-12-15	K213155	RT-Mind-AI	MedMind Technology Co., Ltd.	Radiology	QKB
2021-12-15	K211803	HealthPPT	Zebra Medical Vision Ltd.	Radiology	QFM
2021-12-09	K212466	LVivo Seamless	DiA Imaging Analysis Ltd	Radiology	QIH
2021-12-06	K213096	Al-Rad Companion (Pulmonary)	Siemens Medical Solutions USA, Inc.	Radiology	JAK
2021-12-03	K212219	AHI System	Fifth Eye Inc.	Cardiovascular	QNV
2021-12-03	K212442	Cydar EV (Series B) and Cydar EV Maps	Cydar Ltd.	Radiology	OWB
2021-12-01	K213305	Vantage Fortian 1.5T, MRT-1550, V8.0 with AiCE Reconstruction Processing Unit for MR	Canon Medical Systems Corporation	Radiology	LNH
2021-11-26	K211541	MammoScreen 2.0	Therapixel	Radiology	QDQ
2021-11-19	K210831	OnQ Neuro	CorTechs Labs, Inc	Radiology	QIH
2021-11-19	K211326	EndoScreener	Chengdu Wision Medical Device Co., LTD.	Gastroenterology-Urology	QNP
2021-11-17	K212456	Swoop Point-of-Care Magnetic Resonance Imaging (POC MRI) Scanner System	Hyperfine, Inc.	Radiology	LNH
2021-11-17	K212336	Soteria.AI	Omega Medical Imaging, LLC	Radiology	OWB
2021-11-17	K211678	Lunit INSIGHT MMG	Lunit Inc.	Radiology	QDQ
2021-11-16	K212265	TEX20/TEX20 Pro/TEX20S/TEX20T/TEX20 Exp/TEX20 Elite Diagnostic Ultrasound System, TEX10/ TEX10 Pro/TEX10S/TEX10T/TEX10 Exp/TEX10 Elite/TE X/TE X Lite Diagnostic Ultrasound System	Shenzhen Mindray Bio-Medical Electronics Co.,LTD	Radiology	IYN
2021-11-15	K213436	Clarius Ultrasound Scanner	Clarius Mobile Health Corp.	Radiology	IYN
2021-11-10	K211733	Lunit INSIGHT CXR Triage	Lunit Inc.	Radiology	QFM
2021-11-03	K210543	IM007	Implicity, Inc.	Cardiovascular	DQK
2021-10-29	K211161	Critical Care Suite with Endotracheal Tube Positing AI algorithm	GE Medical Systems, LLC	Radiology	QIH
2021-10-25	K212218	Advanced Algorithms for Treatment Management Applications (AATMA)	Elekta Solutions AB	Radiology	QKB
2021-10-22	K210807	FlightPlan for Liver	GE Medical Systems SCS	Radiology	LLZ
2021-10-22	K212516	IRNF App	Apple Inc.	Cardiovascular	QDB
2021-10-20	K210632	Contour ProtegeAI	MIM Software Inc.	Radiology	QKB
2021-10-14	K210999	SwiftMR	AIRS Medical Inc.	Radiology	LLZ
2021-10-14	K212261	StrokeSENS LVO	Circle Neurovascular Imaging, Inc	Radiology	QAS
2021-10-12	K212116	VBrain-OAR	Vysioneer Inc.	Radiology	QKB
2021-10-02	K202927	EYE-SYNC	SyncThink, Inc.	Neurology	QEA
2021-09-28	K211964	SubtlePET	Subtle Medical, Inc.	Radiology	KPS
2021-09-24	K212704	Philips EPIQ Diagnostic Ultrasound System, Philips Affiniti Diagnostic Ultrasound System	Philips Medical Systems	Radiology	IYN
2021-09-21	DEN200080	Paige Prostate	Paige.AI	Pathology	QPN
2021-09-17	K212067	Deep Learning Image Reconstruction	GE Healthcare Japan Corporation	Radiology	JAK
2021-09-17	K212269	Intelligent NR	Canon Inc.	Radiology	MQB
2021-09-15	K210085	HealthCCSng	Zebra Medical Vision Ltd.	Radiology	JAK
2021-09-10	K203785	ClariSIGMAM	ClariPi Inc.	Radiology	QIH
2021-09-10	K210438	Versana Premier	GE Medical Systems Ultrasound and Primary Care Diagnostics,	Radiology	IYN
2021-09-10	K211828	Aquilion Exceed LB	Canon Medical Systems Corporation	Radiology	JAK
2021-09-09	K211824	HERA W9, HERA W10 Diagnostic Ultrasound System	Samsung Medison Co., Ltd.	Radiology	IYN
2021-09-08	K211945	V8 Diagnostic Ultrasound System	Samsung Medison CO., LTD.	Radiology	IYN
2021-09-08	DEN200030	FEops HEARTguide	FEops NV	Cardiovascular	QQI
2021-09-08	K203555	AmCAD-UT	AmCad BioMed Corporation	Radiology	QIH
2021-09-08	K211597	EPIQ Series Diagnostic Ultrasound System, Affiniti Series Diagnostic Ultrasound System	Philips Medical Systems	Radiology	IYN
2021-09-08	K211867	RayStation 11.0	RaySearch Laboratories AB (publ)	Radiology	MUJ
2021-09-02	K211881	AI Segmentation	Varian Medical Systems, Inc.	Radiology	MUJ
2021-08-31	K201560	Auto Lung Nodule Detection	Samsung Electronics Co.,Ltd.	Radiology	MYN
2021-08-31	K212383	EndoNaut	Therenva SAS	Radiology	OWB
2021-08-27	K203696	RBknee	Radiobotics ApS	Radiology	LLZ
2021-08-20	K211846	Discovery MI Gen2	GE Medical Systems, LLC.	Radiology	KPS
2021-08-16	K212230	TruSPECT Radiological Image Processing Station	Spectrum Dynamics Medical Ltd	Radiology	LLZ
2021-08-12	K211179	InferRead CT Stroke.AI	Infervision Medical Technology Co., Ltd.	Radiology	QAS
2021-08-11	K203448	uCT ATLAS with uWS-CT-Dual Energy Analysis	Shanghai United Imaging Healthcare Co., Ltd.	Radiology	JAK
2021-08-06	K211764	Vereos PET/CT	Philips Medical Systems Nederland B.V.	Radiology	KPS
2021-08-06	K212100	Kosmos	EchoNous, Inc.	Radiology	IYN
2021-08-02	K211431	breastscape v1.0	Olea Medical	Radiology	QIH
2021-07-30	K211222	qER-Quant	Qure.ai Technologies	Radiology	QIH
2021-07-30	K211379	syngo.via RT Image Suite	Siemens Medical Solutions USA Inc.	Radiology	MUJ
2021-07-27	K211655	aPROMISE	EXINI Diagnostics AB	Radiology	LLZ
2021-07-27	K212074	ClariCT.AI	ClariPi Inc.	Radiology	LLZ
2021-07-27	K211279	Volpara Imaging Software	Volpara Health Technologies Limited	Radiology	LLZ
2021-07-27	K210791	Us2.v1	eko.ai Pte. Ltd. d/b/a Us2.ai	Radiology	QIH
2021-07-23	K211951	GI Genius	Cosmo Artificial Intelligence - AI Ltd	Gastroenterology-Urology	QNP
2021-07-20	K211906	Vital Signs	Oxehealth Limited	Cardiovascular	QME
2021-07-20	K210666	Chest-CAD	Imagen Technologies, Inc	Radiology	MYN
2021-07-20	K210719	Change Healthcare Anatomical AI	Change Healthcare Canada Company	Radiology	QIH
2021-07-12	K211506	PowerLook Density Assessment V4.0	iCAD, Inc.	Radiology	QIH
2021-07-08	K211788	HALO	Nico.Lab B.V.	Radiology	QAS
2021-07-01	K210611	MAGNETOM Free.Max	Siemens Medical Solutions USA, Inc.	Radiology	LNH
2021-06-29	K210645	RayStation 10.1	RaySearch Laboratories AB (publ)	Radiology	MUJ
2021-06-17	K203514	Precise Position	Philips Healthcare (Suzhou) Co., Ltd.	Radiology	JAK
2021-06-16	K202718	Qmenta Care Platform Family	Mint Labs, Inc., d/b/a. QMENTA	Radiology	LLZ
2021-06-16	K210034	EnsoSleep	EnsoData, Inc.	Neurology	OLZ
2021-06-11	K210484	LINQ II Insertable Cardiac Monitor, Zelda AI ECG Classification System	Medtronic, Inc.	Cardiovascular	MXD
2021-06-10	K203629	IDx-DR	Digital Diagnostics Inc.	Ophthalmic	PIB
2021-06-10	K211459	syngo.via MI WorkFlows, Scenium, syngo MBF	Siemens Medical Solutions USA, Inc.	Radiology	QIH
2021-06-08	K210458	OPTIS Mobile Next Imaging System, OPTIS Integrated Next Imaging System	Abbott Medical	Radiology	NQQ
2021-06-02	DEN200069	Cognoa ASD Diagnosis Aid	Cognoa, Inc.	Neurology	QPF
2021-06-02	K210404	Transpara 1.7.0	ScreenPoint Medical B.V.	Radiology	QDQ
2021-05-21	K202527	Zio ECG Utilization Software (ZEUS) System	iRhythm Technologies, Inc.	Cardiovascular	DQK
2021-05-19	K210237	CINA CHEST	Avicenna.AI	Radiology	QAS
2021-05-19	K210187	Overjet Dental Assist	Overjet, Inc.	Radiology	LLZ
2021-05-13	K211118	SIGNA 7.0T	GE Medical Systems, LLC	Radiology	LNH
2021-05-13	K210426	HS40 Diagnostic Ultrasound System	Samsung Medison CO., LTD.	Radiology	IYN
2021-04-30	K210001	HYPER AiR	Shanghai United Imaging Healthcare Co.,Ltd.	Radiology	KPS
2021-04-23	K203314	Cartesion Prime (PCD-1000A/3) V10.8	Canon Medical Systems Corporation	Radiology	KPS
2021-04-23	K203502	MEDO-Thyroid	MEDO DX Pte. Ltd.	Radiology	QIH
2021-04-21	K210556	Preview Shoulder	Genesis Software Innovations	Radiology	QIH
2021-04-20	K203610	Automatic Anatomy Recognition (AAR)	Quantitative Radiology Solutions, LLC	Radiology	QKB
2021-04-19	K203469	AI Segmentation	Varian Medical Systems, Inc.	Radiology	MUJ
2021-04-16	K203517	Saige-Q	DeepHealth, Inc.	Radiology	QFM
2021-04-14	K202992	BriefCase, RIB Fractures Triage (RibFx)	Aidoc Medical, Ltd.	Radiology	QFM
2021-04-09	DEN200055	GI Genius	Cosmo Artificial Intelligence - AI, LTD	Gastroenterology-Urology	QNP
2021-04-02	K202928	DV. Target	Deepvoxel INC	Radiology	QKB
2021-04-02	K202441	Eclipse II with Smart Noise Cancellation	Carestream Health, Inc.	Radiology	MQB
2021-04-01	DEN200038	Gili Pro BioSensor (also known as Â“Gili BioSensor SystemÂ”)	ContinUse Biometrics Ltd.	Cardiovascular	QOK
2021-03-31	K210071	SIS System (Version 5.1.0)	Surgical Information Sciences, Inc.	Radiology	LLZ
2021-03-31	K203258	syngo.CT Lung CAD	Siemens Healthcare GmbH	Radiology	OEB
2021-03-31	K203443	MAGNETOM Vida, MAGNETOM Sola, MAGNETOM Lumina, MAGNETOM Altea	Siemens Medical Solutions USA, Inc.	Radiology	LNH
2021-03-26	DEN200019	Oxehealth Vital Signs	Oxehealth Limited	Cardiovascular	QME
2021-03-24	K203225	Aquilion ONE (TSX-306A/3) V10.4 with Spectral Imaging System	Canon Medical Systems Corporation	Radiology	JAK
2021-03-23	K210209	Viz ICH	Viz.ai, Inc.	Radiology	QAS
2021-03-19	K203235	VBrain	Vysioneer Inc.	Radiology	QKB
2021-03-12	K202284	Oncospace	Oncospace, Inc.	Radiology	MUJ
2021-03-12	K203822	ProFound AI Software V3.0	iCAD Inc.	Radiology	QDQ
2021-03-09	K203256	Imbio RV/LV Software	Imbio, LLC	Radiology	QIH
2021-03-05	K202300	Optellum Virtual Nodule Clinic, Optellum software, Optellum platform	Optellum Ltd	Radiology	POK
2021-03-04	K203323	Vantage Galan 3T, MRT-3020, V6.0 with AiCE Reconstruction Processing Unit for MR	Canon Medical Systems Corporation	Radiology	LNH
2021-03-02	K203617	MaxFOV 2	GE Medical Systems, LLC.	Radiology	JAK
2021-03-01	DEN200022	Analytic for Hemodynamic Instability (AHI)	Fifth Eye Inc.	Cardiovascular	QNV
2021-02-26	K203182	SubtleMR	Subtle Medical, Inc.	Radiology	LLZ
2021-02-25	K202990	NinesMeasure	Nines, Inc.	Radiology	LLZ
2021-02-25	K203578	OTIS 2.1 Optical Coherence Tomography System, THiA Optical Coherence Tomography System	Perimeter Medical Imaging AI, Inc.	Radiology	NQQ
2021-02-19	K202212	TruPlan	Circle Cardiovascular Imaging Inc.	Radiology	LLZ
2021-02-09	K203103	Synapse 3D, Synapse 3D Base Tools v6.1	Fujifilm Corporation	Radiology	LLZ
2021-02-05	K210053	LVivo Software Application	DiA Imaging Analysis Ltd	Radiology	QIH
2021-02-04	K203582	QUIBIM Precision Prostate (qp-Prostate)	QUIBIM S.L.	Radiology	LLZ
2021-01-29	K201411	Visage Breast Density	Visage Imaging GmbH	Radiology	QIH
2021-01-15	K202767	Vantage Orian 1.5T, MRT-1550, V6.0	Canon Medical Systems Corporation	Radiology	LNH
2021-01-15	K193271	uAI EasyTriage-Rib	Shanghai United Imaging Intelligence Co., Ltd.	Radiology	QFM
2021-01-14	K202700	ART-Plan	TheraPanacea	Radiology	QKB
2021-01-12	K203280	Hepatica v1 (Hepatica v1.0.0)	Perspectum Ltd.	Radiology	LNH
2021-01-12	K201836	Aquilion Lightning (TSX-036A/7) V10.2 with AiCE-i	Canon Medical Systems Corporation	Radiology	JAK
2021-01-11	P200003	Imagio Breast Imaging System	Seno Medical Instruments, Inc.	Radiology	QNK
2021-01-09	K200717	CLEWICU System (ClewICUServer and ClewICUnitor)	CLEW Medical Ltd.	Cardiovascular	QNL
2021-01-08	K203329	HeartFlow Analysis	HeartFlow, Inc.	Cardiovascular	PJA
2021-01-07	K202414	BrainInsight	Hyperfine Research, Inc	Radiology	LLZ
2020-12-29	K203508	BriefCase	Aidoc Medical, Ltd.	Radiology	QAS
2020-12-22	K202229	AI Metrics	AI Metrics, LLC	Radiology	LLZ
2020-12-18	K201555	EchoGo Pro	Ultromics Ltd	Radiology	POK
2020-12-10	K203042	Aquilion Exceed LB (TSX-202A/3) V10.6 with AiCE-I	Canon Medical Systems Corporation	Radiology	JAK
2020-12-10	K201745	Deep Learning Image Reconstruction for Gemstone Spectral Imaging	GE Medical Systems, LLC	Radiology	JAK
2020-12-07	K201039	HepaFat-AI	Resonance Health Analysis Services Pty Ltd	Radiology	LNH
2020-12-04	K202487	HealthJOINT	Zebra Medical Vision Ltd.	Radiology	LLZ
[truncated: 303 more rows]

## Sheet: unique_all_devices
device	company	panel	product_code	total_submissions	first_decision	last_decision	avg_days_between_submissions	median_days_between_submissions
[truncated: 1,141 more rows]

[truncated: 9 more sheets: unique_rad_sequential_submissio, pccp_non_aiml, pccp_aiml, multiple submissions, multiple_submissions_count, product_codes, scoring- pccp devices, quarterly clearances, pccp adoption]
